# Supplementary material
Source: PubMed Central journal article supplement (PMC7784039)
Supplement: NIHMS1647030-supplement-Supplemental_Materials.pdf [file NIHMS1647030-supplement-Supplemental_Materials.pdf]

## Online supplemental methods

### Study population

This study was performed in participants from the Nijmegen Biomedical Study (NBS). Details of the NBS have been described before.<sup>1</sup> Briefly, the NBS is a population-based survey conducted by the Department for Health Evidence and the Department of Laboratory Medicine of the Radboud University Medical Centre, Nijmegen, The Netherlands. Approval to conduct the study was obtained from the Radboud University Medical Centre Institutional Review Board. Age- and sex-stratified randomly selected adult inhabitants of Nijmegen (n=22,451), a city located in the eastern part of the Netherlands, received an invitation to fill out a postal questionnaire including questions about lifestyle, health status, and medical history, and to donate a blood sample for DNA isolation and biochemical studies. A total of 9350 (43%) persons filled out the questionnaire, of which 6468 (69%) responders donated blood samples. All participants gave written informed consent for participation in the NBS.

Genotype data were available for 1832 out of the 6468 blood samples, because they were selected to serve as controls in GWAS.<sup>2</sup> For all these samples, measurements of hepcidin, iron parameters (iron, ferritin, TS and TIBC), liver enzyme alanine aminotransferase (ALT), creatinine, and C-reactive protein (CRP) were available. In addition, the following variables were extracted from the self-administered questionnaire: length, weight (used to derive body mass index [BMI]), age, use of iron supplements for at least 6 months at time of blood donation, presence of anemia determined by a physician, and pregnancy.

### Laboratory methods

Serum hepcidin, total serum iron, TIBC, TS and ferritin were measured as described before.<sup>3</sup>

Serum hepcidin concentration was measured with an in house developed and validated competitive enzyme-linked immunosorbent assay.<sup>3, 4</sup> In short, 96-well plates were coated with goat anti-rabbit IgG, blocked with bovine serum albumin and incubated with an in-house raised rabbit anti-human

hepcidin antibody.<sup>5</sup> Standards, study samples and a reference sample were added and thereafter incubated with streptavidin- $\beta$ -peroxidase conjugate. A color reaction was started by adding O-phenylenediamine substrate. Optical density was measured at 492 nm in an automated c-enzyme-linked immunosorbent assay reader as a read out. The analytical sensitivity, defined as the minimum hepcidin concentration evoking a response significantly different from that of the zero calibrator, was 8.96 pM. As the samples were 20-fold diluted, samples found to have a hepcidin concentration less than 179 pM (20 x 8.96pM) were imputed with a random value out of a uniform distribution with a minimum of 0 nM and a maximum of 0.18 nM (n=9). Hepcidin concentrations are expressed in nanomoles per liter; 1 nM serum hepcidin equals 2.79  $\mu$ g/L.

#### Genotyping and selection of SNPs

A total of 1980 participants of the NBS were genotyped with the Illumina HumanHapCNV370-Duo BeadChip.<sup>2</sup> Pre-imputation quality control criteria included sample yield  $\geq 96\%$ , Caucasian ancestry  $\geq 90\%$  (based on Structure analysis), SNP yield  $\geq 96\%$ , minor allele frequency (MAF)  $\geq 1\%$ , and Hardy-Weinberg equilibrium (HWE) p-value  $>10^{-6}$ . This resulted in 1832 samples and 312,199 SNPs available for imputation, which was performed with CEU HapMap Phase II (release 22, NCBI build 36, dbSNP build 126) as a reference sample using IMPUTE software.<sup>6</sup> After imputation, a total of 2,542,995 SNPs was available. Genotype data for the SNPs within the genes *HFE* and *TMPRSS6* were extracted for the purpose of this study, including SNPs within the 10 kb surrounding region on each side of both genes. Imputed SNPs were transformed to hard calls using a genotype probability threshold of 0.9: genotypes that did not exceed the probability threshold of 0.9 were set to missing. Selection of SNPs with MAF  $\geq 1\%$  and a HWE p-value  $>10^{-3}$  resulted in the inclusion of 35 SNPs (7 genotyped) for *HFE* and 66 SNPs (16 genotyped) for *TMPRSS6* (Supplemental Table 1). All imputed SNPs that were included in our study, had a quality of imputation of  $>0.4$  as measured using the SNPtest proper-info measure.

Haplotype analyses were applied to uncover allelic interactions. We did not focus on the identification of associations with unmeasured variants in LD with the haplotypes for which the prior chance is low given the availability of high density imputed SNP data. In the haplotype analysis only non-synonymous SNPs and SNPs known to influence expression of *HFE* or *TMPRSS6* were included. With regard to the latter, SNPs were selected based on the following expression databases: SCAN<sup>7</sup>, the Chicago eQTL browser from the Pritchard lab (<http://eqtl.uchicago.edu>), seeQTL<sup>8</sup> and GTEx (Genotype-Tissue Expression) eQTL Browser (<http://www.ncbi.nlm.nih.gov/gtex/GTEX2/gtex.cgi>). We only included SNPs that were found to influence expression in liver tissue samples or in blood samples converted into cell lines (e.g. HapMap CEU cell lines). The variant selection procedure resulted in the inclusion of the SNPs rs855791 (p.Ala736Val), rs2235324 (p.Lys253Glu) and rs2160906 for *TMPRSS6* and rs1800562 (p.Cys282Tyr), rs1799945 (p.His63Asp) and rs198853 for *HFE*. These SNPs are non-synonymous variants except for rs2160906 and rs198853, which are eQTL located in an intron of *TMPRSS6* and in the 10 kb flanking region of *HFE*, respectively. There was no linkage disequilibrium between the variants within the genes ( $r$ -squared < 0.2).

#### Statistical analysis

The variables hepcidin, ferritin and the ratios of hepcidin to ferritin and hepcidin to TS were skewed towards higher values and therefore log-transformed to normalize their distributions. Outliers, defined as values that differed more than three times the standard deviation (SD) from the mean, were reduced to mean  $\pm$  3 SD (maximal number of outliers per trait: 26).

Two different subsets were created. The first one was selected based on the same criteria as used by Traglia *et al.*<sup>9</sup>: exclusion of persons with CRP >10 mg/L or ferritin <30  $\mu$ g/L. The second subset was selected based on the same criteria as previously<sup>3</sup> excluding persons with characteristics evidently influencing hepcidin concentration. The exclusion criteria were: pregnancy at time of blood sampling, ALT >50 U/L, CRP >10 mg/L, eGFR <60 mL/min/1.73 m<sup>2</sup>, use of iron supplements, presence of anemia, or BMI >30 kg/m<sup>2</sup>. Results for the subset were compared with results for the whole cohort to

investigate whether the results for the whole cohort were influenced by extreme values on these variables.

Association analyses were performed using Plink v1.07 (<http://pngu.mgh.harvard.edu/purcell/plink/>)<sup>10</sup>. The associations between the SNPs and the traits were evaluated using linear regression analyses adjusted for age, gender and time of blood sampling, since these variables are independent determinants of serum hepcidin.<sup>3</sup> We coded the most frequent homozygote genotype as 0 (reference), heterozygotes as 1, and the less frequent homozygote genotype as 2 and applied a genotypic (2 degrees of freedom) test to allow for deviation from additivity. The resulting regression coefficients express the mean change in the independent variable for the heterozygous and minor homozygous genotype relative to the reference genotype. In case of log-transformation of the independent variables, regression coefficients express the mean change in the log-transformed variable relative to the reference genotype.

Haplotypes were constructed based on inclusion of all SNPs fulfilling selection criteria in one gene. Haplotypes with estimated frequencies of 1% or higher were included in the haplotype analyses. For each trait, a haplotype association model was compared to the allelic effect of *TMPRSS6* c.2321G>A or *HFE* c.845G>A in order to conclude whether there was an additional effect of the haplotypes on top of the marginal allelic effect of *TMPRSS6* c.2321G>A or *HFE*-p.Cys282Tyr alone.

Conditional analyses to estimate the effect of a gene variant or haplotype independent of the effect of another variant was performed by including the latter as covariate in a multivariable regression model.

Due to multiple testing issues, the nominal significance level of 0.05 is not sufficient to maintain an overall study false-positive rate of 5%. Application of a Bonferroni correction for the number of tested SNPs (*i.e.* 35 + 66 = 101) would lead to a p-value threshold of significance of  $5 \times 10^{-4}$ .

1. Hoogendoorn EH, Hermus AR, de Vegt F, Ross HA, Verbeek AL, Kiemeny LA, et al. Thyroid function and prevalence of anti-thyroperoxidase antibodies in a population with borderline sufficient iodine intake: influences of age and sex. *Clinical chemistry*. 2006 Jan;52(1):104-11.
2. Kiemeny LA, Thorlacius S, Sulem P, Geller F, Aben KK, Stacey SN, et al. Sequence variant on 8q24 confers susceptibility to urinary bladder cancer. *Nature genetics*. 2008 Nov;40(11):1307-12.
3. Galesloot TE, Vermeulen SH, Geurts-Moespot AJ, Klaver SM, Kroot JJ, van Tienoven D, et al. Serum hepcidin: reference ranges and biochemical correlates in the general population. *Blood*. 2011 Jun 23;117(25):e218-25.
4. Kroot JJ, Laarakkers CM, Geurts-Moespot AJ, Grebenchtchikov N, Pickkers P, van Ede AE, et al. Immunochemical and mass-spectrometry-based serum hepcidin assays for iron metabolism disorders. *Clinical chemistry*. 2010 Oct;56(10):1570-9.
5. Grebenchtchikov N, Geurts-Moespot AJ, Kroot JJ, den Heijer M, Tjalsma H, Swinkels DW, et al. High-sensitive radioimmunoassay for human serum hepcidin. *British journal of haematology*. 2009 Aug;146(3):317-25.
6. Marchini J, Howie B, Myers S, McVean G, Donnelly P. A new multipoint method for genome-wide association studies by imputation of genotypes. *Nature genetics*. 2007 Jul;39(7):906-13.
7. Gamazon ER, Zhang W, Konkashbaev A, Duan S, Kistner EO, Nicolae DL, et al. SCAN: SNP and copy number annotation. *Bioinformatics*. 2010 Jan 15;26(2):259-62.
8. Xia K, Shabalín AA, Huang S, Madar V, Zhou YH, Wang W, et al. seeQTL: a searchable database for human eQTLs. *Bioinformatics*. 2012 Feb 1;28(3):451-2.
9. Traglia M, Girelli D, Biino G, Campostrini N, Corbella M, Sala C, et al. Association of HFE and TMPRSS6 genetic variants with iron and erythrocyte parameters is only in part dependent on serum hepcidin concentrations. *Journal of medical genetics*. 2011 Sep;48(9):629-34.
10. Purcell S, Neale B, Todd-Brown K, Thomas L, Ferreira MA, Bender D, et al. PLINK: a tool set for whole-genome association and population-based linkage analyses. *American journal of human genetics*. 2007 Sep;81(3):559-75.

## SUPPLEMENT

Table S1. SNPs in *HFE* and *TMPRSS6* included in our study.

| Gene           | SNP        | Genotyped or imputed? |
|----------------|------------|-----------------------|
| <i>HFE</i>     | rs9295687  | Imputed               |
|                | rs4529296  | Imputed               |
|                | rs9379825  | Imputed               |
|                | rs9467672  | Imputed               |
|                | rs9295688  | Imputed               |
|                | rs2006736  | Imputed               |
|                | rs1800702  | Imputed               |
|                | rs2794720  | Imputed               |
|                | rs2794719  | Imputed               |
|                | rs9366637  | Genotyped             |
|                | rs1799945  | Imputed               |
|                | rs2071303  | Imputed               |
|                | rs1800562  | Genotyped             |
|                | rs1800708  | Imputed               |
|                | rs2858996  | Imputed               |
|                | rs1572982  | Genotyped             |
|                | rs707889   | Genotyped             |
|                | rs1045537  | Imputed               |
|                | rs12346    | Imputed               |
|                | rs17596719 | Genotyped             |
|                | rs6918586  | Genotyped             |
|                | rs9393685  | Imputed               |
|                | rs1150659  | Imputed               |
|                | rs1150660  | Imputed               |
|                | rs198857   | Imputed               |
|                | rs198856   | Imputed               |
|                | rs1543680  | Genotyped             |
|                | rs198855   | Imputed               |
|                | rs7743957  | Imputed               |
|                | rs198854   | Imputed               |
|                | rs198853   | Imputed               |
|                | rs2229768  | Imputed               |
|                | rs198852   | Imputed               |
| rs198851       | Imputed    |                       |
| rs198848       | Imputed    |                       |
| <i>TMPRSS6</i> | rs2235320  | Genotyped             |
|                | rs2235321  | Imputed               |
|                | rs855791   | Genotyped             |
|                | rs5756504  | Imputed               |
|                | rs5756505  | Imputed               |
|                | rs5756506  | Imputed               |
|                | rs4820268  | Genotyped             |
|                | rs13055107 | Imputed               |
|                | rs2413450  | Imputed               |
|                | rs855789   | Genotyped             |
| rs855788       | Genotyped  |                       |

|            |           |
|------------|-----------|
| rs17750017 | Imputed   |
| rs2743820  | Imputed   |
| rs1005478  | Imputed   |
| rs7286184  | Imputed   |
| rs2246092  | Imputed   |
| rs2543519  | Imputed   |
| rs2111833  | Imputed   |
| rs2179229  | Imputed   |
| rs2235323  | Imputed   |
| rs2235324  | Genotyped |
| rs736852   | Imputed   |
| rs2019848  | Imputed   |
| rs1421312  | Genotyped |
| rs2543514  | Imputed   |
| rs2543513  | Imputed   |
| rs2413451  | Imputed   |
| rs2251655  | Imputed   |
| rs2743824  | Imputed   |
| rs2543509  | Imputed   |
| rs2743825  | Imputed   |
| rs2160906  | Genotyped |
| rs732755   | Imputed   |
| rs8139988  | Imputed   |
| rs2017764  | Imputed   |
| rs733655   | Imputed   |
| rs2281090  | Imputed   |
| rs2281091  | Imputed   |
| rs228906   | Genotyped |
| rs7289616  | Imputed   |
| rs9619658  | Imputed   |
| rs228907   | Genotyped |
| rs17750152 | Imputed   |
| rs4140590  | Imputed   |
| rs4140589  | Imputed   |
| rs5995380  | Imputed   |
| rs11704654 | Imputed   |
| rs5756515  | Imputed   |
| rs5756516  | Imputed   |
| rs228909   | Genotyped |
| rs228910   | Genotyped |
| rs2235329  | Imputed   |
| rs228913   | Genotyped |
| rs228916   | Imputed   |
| rs228918   | Genotyped |
| rs228919   | Imputed   |
| rs2092169  | Imputed   |
| rs228921   | Imputed   |
| rs3076475  | Imputed   |
| rs228924   | Genotyped |
| rs228925   | Imputed   |
| rs5756520  | Imputed   |
| rs11914132 | Genotyped |
| rs738297   | Imputed   |

|            |         |
|------------|---------|
| rs11089823 | Imputed |
| rs11089824 | Imputed |

---



**Table S2. Characteristics of subset 1 (N=1505) and subset 2 (N=1177).**

|                                     |                        | Subset 1 (N=1505) |     |             | Subset 2 (N=1177) |     |             |
|-------------------------------------|------------------------|-------------------|-----|-------------|-------------------|-----|-------------|
|                                     |                        | N*                | %   | Mean (SD)   | N*                | %   | Mean (SD)   |
| Gender                              | Males                  | 793               | 53  | NA          | 660               | 56  | NA          |
|                                     | Females                | 712               | 47  | NA          | 517               | 44  | NA          |
| Age, years                          |                        | 1505              | 100 | 62.5 (9.7)  | 1177              | 100 | 61.6 (10.0) |
| Time of blood sampling              | Before 12 pm           | 314               | 21  | NA          | 248               | 21  | NA          |
|                                     | Between 12 pm and 5 pm | 970               | 65  | NA          | 740               | 63  | NA          |
|                                     | After 5 pm             | 216               | 14  | NA          | 186               | 16  | NA          |
|                                     | Unknown                | 5                 | 0   | NA          | 3                 | 0   | NA          |
| Hepcidin, nM†                       |                        | 1505              | 100 | 7.7 (2.0)   | 1177              | 100 | 6.2 (2.5)   |
| Ferritin, µg/L†                     |                        | 1503              | 100 | 131.5 (2.0) | 1175              | 100 | 107.1 (2.5) |
| Ratio hepcidin/ferritin, nmoles/µg† |                        | 1503              | 100 | 58.8 (1.9)  | 1175              | 100 | 58.0 (1.9)  |
| Ratio hepcidin/TS, nM/%†            |                        | 1486              | 99  | 0.26 (2.1)  | 1167              | 99  | 0.21 (2.5)  |
| Iron, µM                            |                        | 1486              | 99  | 18.0 (5.3)  | 1167              | 99  | 17.9 (5.6)  |
| TS, %                               |                        | 1486              | 99  | 31.3 (9.7)  | 1167              | 99  | 31.0 (10.5) |
| TIBC, µM                            |                        | 1486              | 99  | 58.2 (8.1)  | 1167              | 99  | 59.0 (8.9)  |

Subset 1 is selected based on the following exclusion criteria: CRP >10 mg/L or ferritin <30 µg/L.

Subset 2 is selected based on the following exclusion criteria: pregnancy at time of blood sampling, ALT >50 U/L, CRP >10 mg/L, eGFR <60 mL/min/1.73 m<sup>2</sup>, use of iron supplements, presence of anemia, or BMI >30 kg/m<sup>2</sup>.

N indicates number; SD, standard deviation; NA, not applicable.

\*Numbers are different from the total number of included persons because of missing values.

†The variables hepcidin, ferritin, ratio hepcidin/ferritin and ratio hepcidin/TS were log-transformed, and therefore geometric mean and SD are given.

**Table S3. HFE and TMPRSS6 single SNP association results for ferritin, iron, TS and TIBC in the total study population.**

| Trait     | Gene | SNP       | A1 | TEST     | NMISS | BETA   | SE    | L95    | U95    | STAT  | P        |
|-----------|------|-----------|----|----------|-------|--------|-------|--------|--------|-------|----------|
| log(ferr) | HFE  | rs9295687 | C  | HOM      | 1763  | 0.011  | 0.025 | -0.038 | 0.061  | 0.45  | 6.56E-01 |
|           | HFE  | rs9295687 | C  | HET      | 1763  | -0.019 | 0.019 | -0.056 | 0.019  | -0.98 | 3.29E-01 |
|           | HFE  | rs9295687 | C  | GENO_2DF | 1763  | NA     | NA    | NA     | NA     | 1.85  | 3.98E-01 |
|           | HFE  | rs4529296 | G  | HOM      | 1763  | 0.011  | 0.025 | -0.038 | 0.061  | 0.45  | 6.56E-01 |
|           | HFE  | rs4529296 | G  | HET      | 1763  | -0.019 | 0.019 | -0.056 | 0.019  | -0.98 | 3.29E-01 |
|           | HFE  | rs4529296 | G  | GENO_2DF | 1763  | NA     | NA    | NA     | NA     | 1.85  | 3.98E-01 |
|           | HFE  | rs9379825 | A  | HOM      | 1763  | 0.011  | 0.025 | -0.038 | 0.061  | 0.45  | 6.56E-01 |
|           | HFE  | rs9379825 | A  | HET      | 1763  | -0.019 | 0.019 | -0.056 | 0.019  | -0.98 | 3.29E-01 |
|           | HFE  | rs9379825 | A  | GENO_2DF | 1763  | NA     | NA    | NA     | NA     | 1.85  | 3.98E-01 |
|           | HFE  | rs9467672 | T  | HOM      | 1763  | 0.011  | 0.025 | -0.038 | 0.061  | 0.45  | 6.56E-01 |
|           | HFE  | rs9467672 | T  | HET      | 1763  | -0.019 | 0.019 | -0.056 | 0.019  | -0.98 | 3.29E-01 |
|           | HFE  | rs9467672 | T  | GENO_2DF | 1763  | NA     | NA    | NA     | NA     | 1.85  | 3.98E-01 |
|           | HFE  | rs9295688 | A  | HOM      | 1762  | 0.010  | 0.025 | -0.039 | 0.060  | 0.41  | 6.80E-01 |
|           | HFE  | rs9295688 | A  | HET      | 1762  | -0.019 | 0.019 | -0.056 | 0.019  | -0.97 | 3.30E-01 |
|           | HFE  | rs9295688 | A  | GENO_2DF | 1762  | NA     | NA    | NA     | NA     | 1.77  | 4.12E-01 |
|           | HFE  | rs2006736 | T  | HOM      | 1762  | 0.010  | 0.025 | -0.039 | 0.060  | 0.41  | 6.80E-01 |
|           | HFE  | rs2006736 | T  | HET      | 1762  | -0.019 | 0.019 | -0.056 | 0.019  | -0.97 | 3.30E-01 |
|           | HFE  | rs2006736 | T  | GENO_2DF | 1762  | NA     | NA    | NA     | NA     | 1.77  | 4.12E-01 |
|           | HFE  | rs1800702 | G  | HOM      | 1762  | 0.010  | 0.025 | -0.039 | 0.060  | 0.41  | 6.80E-01 |
|           | HFE  | rs1800702 | G  | HET      | 1762  | -0.019 | 0.019 | -0.056 | 0.019  | -0.97 | 3.30E-01 |
|           | HFE  | rs1800702 | G  | GENO_2DF | 1762  | NA     | NA    | NA     | NA     | 1.77  | 4.12E-01 |
|           | HFE  | rs2794720 | C  | HOM      | 1762  | 0.010  | 0.025 | -0.039 | 0.060  | 0.41  | 6.80E-01 |
|           | HFE  | rs2794720 | C  | HET      | 1762  | -0.019 | 0.019 | -0.056 | 0.019  | -0.97 | 3.30E-01 |
|           | HFE  | rs2794720 | C  | GENO_2DF | 1762  | NA     | NA    | NA     | NA     | 1.77  | 4.12E-01 |
|           | HFE  | rs2794719 | G  | HOM      | 1762  | 0.010  | 0.025 | -0.039 | 0.060  | 0.41  | 6.80E-01 |
|           | HFE  | rs2794719 | G  | HET      | 1762  | -0.019 | 0.019 | -0.056 | 0.019  | -0.97 | 3.30E-01 |
|           | HFE  | rs2794719 | G  | GENO_2DF | 1762  | NA     | NA    | NA     | NA     | 1.77  | 4.12E-01 |
|           | HFE  | rs9366637 | T  | HOM      | 1822  | -0.067 | 0.138 | -0.337 | 0.202  | -0.49 | 6.25E-01 |
|           | HFE  | rs9366637 | T  | HET      | 1822  | -0.073 | 0.028 | -0.128 | -0.019 | -2.63 | 8.67E-03 |
|           | HFE  | rs9366637 | T  | GENO_2DF | 1822  | NA     | NA    | NA     | NA     | 7.09  | 2.89E-02 |

|  |            |            |   |          |      |        |       |        |        |       |          |
|--|------------|------------|---|----------|------|--------|-------|--------|--------|-------|----------|
|  | <i>HFE</i> | rs1799945  | G | HOM      | 1773 | 0.061  | 0.050 | -0.037 | 0.159  | 1.22  | 2.24E-01 |
|  | <i>HFE</i> | rs1799945  | G | HET      | 1773 | 0.022  | 0.020 | -0.018 | 0.062  | 1.09  | 2.78E-01 |
|  | <i>HFE</i> | rs1799945  | G | GENO_2DF | 1773 | NA     | NA    | NA     | NA     | 2.42  | 2.98E-01 |
|  | <i>HFE</i> | rs2071303  | C | HOM      | 1822 | 0.005  | 0.028 | -0.049 | 0.059  | 0.18  | 8.57E-01 |
|  | <i>HFE</i> | rs2071303  | C | HET      | 1822 | 0.009  | 0.018 | -0.027 | 0.045  | 0.49  | 6.26E-01 |
|  | <i>HFE</i> | rs2071303  | C | GENO_2DF | 1822 | NA     | NA    | NA     | NA     | 0.24  | 8.88E-01 |
|  | <i>HFE</i> | rs1800562  | A | HOM      | 1822 | 0.689  | 0.181 | 0.333  | 1.044  | 3.80  | 1.51E-04 |
|  | <i>HFE</i> | rs1800562  | A | HET      | 1822 | 0.044  | 0.026 | -0.008 | 0.095  | 1.67  | 9.48E-02 |
|  | <i>HFE</i> | rs1800562  | A | GENO_2DF | 1822 | NA     | NA    | NA     | NA     | 17.02 | 2.01E-04 |
|  | <i>HFE</i> | rs1800708  | C | HOM      | 1821 | -0.070 | 0.149 | -0.361 | 0.222  | -0.47 | 6.39E-01 |
|  | <i>HFE</i> | rs1800708  | C | HET      | 1821 | -0.070 | 0.027 | -0.123 | -0.016 | -2.55 | 1.09E-02 |
|  | <i>HFE</i> | rs1800708  | C | GENO_2DF | 1821 | NA     | NA    | NA     | NA     | 6.67  | 3.57E-02 |
|  | <i>HFE</i> | rs2858996  | T | HOM      | 1821 | 0.060  | 0.046 | -0.030 | 0.151  | 1.31  | 1.91E-01 |
|  | <i>HFE</i> | rs2858996  | T | HET      | 1821 | -0.010 | 0.018 | -0.045 | 0.026  | -0.54 | 5.92E-01 |
|  | <i>HFE</i> | rs2858996  | T | GENO_2DF | 1821 | NA     | NA    | NA     | NA     | 2.24  | 3.26E-01 |
|  | <i>HFE</i> | rs1572982  | A | HOM      | 1822 | -0.012 | 0.025 | -0.060 | 0.036  | -0.51 | 6.12E-01 |
|  | <i>HFE</i> | rs1572982  | A | HET      | 1822 | 0.002  | 0.020 | -0.037 | 0.041  | 0.12  | 9.07E-01 |
|  | <i>HFE</i> | rs1572982  | A | GENO_2DF | 1822 | NA     | NA    | NA     | NA     | 0.45  | 7.98E-01 |
|  | <i>HFE</i> | rs707889   | A | HOM      | 1822 | 0.060  | 0.046 | -0.030 | 0.151  | 1.31  | 1.91E-01 |
|  | <i>HFE</i> | rs707889   | A | HET      | 1822 | -0.010 | 0.018 | -0.046 | 0.025  | -0.56 | 5.76E-01 |
|  | <i>HFE</i> | rs707889   | A | GENO_2DF | 1822 | NA     | NA    | NA     | NA     | 2.28  | 3.21E-01 |
|  | <i>HFE</i> | rs1045537  | C | HOM      | 1771 | -0.085 | 0.064 | -0.210 | 0.041  | -1.32 | 1.86E-01 |
|  | <i>HFE</i> | rs1045537  | C | HET      | 1771 | 0.024  | 0.021 | -0.017 | 0.065  | 1.15  | 2.52E-01 |
|  | <i>HFE</i> | rs1045537  | C | GENO_2DF | 1771 | NA     | NA    | NA     | NA     | 3.30  | 1.92E-01 |
|  | <i>HFE</i> | rs12346    | T | HOM      | 1822 | 0.001  | 0.029 | -0.056 | 0.058  | 0.05  | 9.61E-01 |
|  | <i>HFE</i> | rs12346    | T | HET      | 1822 | 0.007  | 0.018 | -0.028 | 0.042  | 0.39  | 6.99E-01 |
|  | <i>HFE</i> | rs12346    | T | GENO_2DF | 1822 | NA     | NA    | NA     | NA     | 0.16  | 9.25E-01 |
|  | <i>HFE</i> | rs17596719 | A | HOM      | 1820 | 0.066  | 0.082 | -0.094 | 0.227  | 0.81  | 4.19E-01 |
|  | <i>HFE</i> | rs17596719 | A | HET      | 1820 | -0.038 | 0.021 | -0.080 | 0.004  | -1.75 | 7.98E-02 |
|  | <i>HFE</i> | rs17596719 | A | GENO_2DF | 1820 | NA     | NA    | NA     | NA     | 3.89  | 1.43E-01 |
|  | <i>HFE</i> | rs6918586  | C | HOM      | 1819 | 0.014  | 0.025 | -0.036 | 0.064  | 0.57  | 5.71E-01 |
|  | <i>HFE</i> | rs6918586  | C | HET      | 1819 | 0.021  | 0.019 | -0.016 | 0.058  | 1.13  | 2.59E-01 |
|  | <i>HFE</i> | rs6918586  | C | GENO_2DF | 1819 | NA     | NA    | NA     | NA     | 1.29  | 5.26E-01 |

|  |     |           |   |          |      |        |       |        |        |       |          |
|--|-----|-----------|---|----------|------|--------|-------|--------|--------|-------|----------|
|  | HFE | rs9393685 | C | HOM      | 1815 | -0.068 | 0.149 | -0.360 | 0.224  | -0.46 | 6.49E-01 |
|  | HFE | rs9393685 | C | HET      | 1815 | -0.056 | 0.027 | -0.108 | -0.003 | -2.09 | 3.71E-02 |
|  | HFE | rs9393685 | C | GENO_2DF | 1815 | NA     | NA    | NA     | NA     | 4.52  | 1.04E-01 |
|  | HFE | rs1150659 | A | HOM      | 1820 | 0.058  | 0.046 | -0.032 | 0.147  | 1.26  | 2.07E-01 |
|  | HFE | rs1150659 | A | HET      | 1820 | -0.010 | 0.018 | -0.046 | 0.025  | -0.57 | 5.68E-01 |
|  | HFE | rs1150659 | A | GENO_2DF | 1820 | NA     | NA    | NA     | NA     | 2.17  | 3.39E-01 |
|  | HFE | rs1150660 | A | HOM      | 1822 | 0.001  | 0.029 | -0.056 | 0.058  | 0.05  | 9.61E-01 |
|  | HFE | rs1150660 | A | HET      | 1822 | 0.007  | 0.018 | -0.028 | 0.042  | 0.39  | 6.99E-01 |
|  | HFE | rs1150660 | A | GENO_2DF | 1822 | NA     | NA    | NA     | NA     | 0.16  | 9.25E-01 |
|  | HFE | rs198857  | G | HOM      | 1820 | -0.012 | 0.025 | -0.060 | 0.036  | -0.49 | 6.27E-01 |
|  | HFE | rs198857  | G | HET      | 1820 | 0.003  | 0.020 | -0.036 | 0.042  | 0.15  | 8.84E-01 |
|  | HFE | rs198857  | G | GENO_2DF | 1820 | NA     | NA    | NA     | NA     | 0.45  | 7.99E-01 |
|  | HFE | rs198856  | G | HOM      | 1820 | -0.012 | 0.025 | -0.060 | 0.036  | -0.49 | 6.27E-01 |
|  | HFE | rs198856  | G | HET      | 1820 | 0.003  | 0.020 | -0.036 | 0.042  | 0.15  | 8.84E-01 |
|  | HFE | rs198856  | G | GENO_2DF | 1820 | NA     | NA    | NA     | NA     | 0.45  | 7.99E-01 |
|  | HFE | rs1543680 | A | HOM      | 1816 | 0.052  | 0.046 | -0.038 | 0.143  | 1.13  | 2.57E-01 |
|  | HFE | rs1543680 | A | HET      | 1816 | -0.012 | 0.018 | -0.047 | 0.024  | -0.64 | 5.24E-01 |
|  | HFE | rs1543680 | A | GENO_2DF | 1816 | NA     | NA    | NA     | NA     | 1.93  | 3.81E-01 |
|  | HFE | rs198855  | A | HOM      | 1773 | 0.018  | 0.034 | -0.048 | 0.084  | 0.53  | 5.97E-01 |
|  | HFE | rs198855  | A | HET      | 1773 | 0.003  | 0.018 | -0.033 | 0.038  | 0.14  | 8.86E-01 |
|  | HFE | rs198855  | A | GENO_2DF | 1773 | NA     | NA    | NA     | NA     | 0.28  | 8.69E-01 |
|  | HFE | rs7743957 | C | HOM      | 1815 | -0.068 | 0.149 | -0.360 | 0.224  | -0.46 | 6.49E-01 |
|  | HFE | rs7743957 | C | HET      | 1815 | -0.056 | 0.027 | -0.108 | -0.003 | -2.09 | 3.71E-02 |
|  | HFE | rs7743957 | C | GENO_2DF | 1815 | NA     | NA    | NA     | NA     | 4.52  | 1.04E-01 |
|  | HFE | rs198854  | T | HOM      | 1821 | -0.012 | 0.025 | -0.060 | 0.036  | -0.48 | 6.33E-01 |
|  | HFE | rs198854  | T | HET      | 1821 | 0.003  | 0.020 | -0.036 | 0.042  | 0.15  | 8.84E-01 |
|  | HFE | rs198854  | T | GENO_2DF | 1821 | NA     | NA    | NA     | NA     | 0.44  | 8.04E-01 |
|  | HFE | rs198853  | C | HOM      | 1822 | 0.001  | 0.029 | -0.056 | 0.058  | 0.05  | 9.61E-01 |
|  | HFE | rs198853  | C | HET      | 1822 | 0.007  | 0.018 | -0.028 | 0.042  | 0.39  | 6.99E-01 |
|  | HFE | rs198853  | C | GENO_2DF | 1822 | NA     | NA    | NA     | NA     | 0.16  | 9.25E-01 |
|  | HFE | rs2229768 | C | HOM      | 1821 | 0.058  | 0.046 | -0.032 | 0.147  | 1.26  | 2.07E-01 |
|  | HFE | rs2229768 | C | HET      | 1821 | -0.010 | 0.018 | -0.046 | 0.025  | -0.58 | 5.65E-01 |
|  | HFE | rs2229768 | C | GENO_2DF | 1821 | NA     | NA    | NA     | NA     | 2.17  | 3.38E-01 |

|  |                |            |   |          |      |        |       |        |       |       |          |
|--|----------------|------------|---|----------|------|--------|-------|--------|-------|-------|----------|
|  | <i>HFE</i>     | rs198852   | G | HOM      | 1822 | 0.036  | 0.026 | -0.015 | 0.086 | 1.39  | 1.65E-01 |
|  | <i>HFE</i>     | rs198852   | G | HET      | 1822 | 0.012  | 0.019 | -0.025 | 0.049 | 0.64  | 5.23E-01 |
|  | <i>HFE</i>     | rs198852   | G | GENO_2DF | 1822 | NA     | NA    | NA     | NA    | 1.94  | 3.79E-01 |
|  | <i>HFE</i>     | rs198851   | T | HOM      | 1662 | 0.071  | 0.058 | -0.041 | 0.184 | 1.24  | 2.15E-01 |
|  | <i>HFE</i>     | rs198851   | T | HET      | 1662 | 0.023  | 0.022 | -0.020 | 0.066 | 1.05  | 2.96E-01 |
|  | <i>HFE</i>     | rs198851   | T | GENO_2DF | 1662 | NA     | NA    | NA     | NA    | 2.44  | 2.96E-01 |
|  | <i>HFE</i>     | rs198848   | T | HOM      | 1822 | 0.036  | 0.026 | -0.015 | 0.086 | 1.39  | 1.65E-01 |
|  | <i>HFE</i>     | rs198848   | T | HET      | 1822 | 0.012  | 0.019 | -0.025 | 0.049 | 0.64  | 5.23E-01 |
|  | <i>HFE</i>     | rs198848   | T | GENO_2DF | 1822 | NA     | NA    | NA     | NA    | 1.94  | 3.79E-01 |
|  | <i>TMPRSS6</i> | rs2235320  | T | HOM      | 1821 | -0.136 | 0.071 | -0.275 | 0.002 | -1.93 | 5.36E-02 |
|  | <i>TMPRSS6</i> | rs2235320  | T | HET      | 1821 | 0.030  | 0.020 | -0.010 | 0.070 | 1.46  | 1.45E-01 |
|  | <i>TMPRSS6</i> | rs2235320  | T | GENO_2DF | 1821 | NA     | NA    | NA     | NA    | 6.26  | 4.36E-02 |
|  | <i>TMPRSS6</i> | rs2235321  | A | HOM      | 1577 | 0.018  | 0.030 | -0.042 | 0.078 | 0.59  | 5.53E-01 |
|  | <i>TMPRSS6</i> | rs2235321  | A | HET      | 1577 | 0.013  | 0.019 | -0.025 | 0.051 | 0.68  | 4.98E-01 |
|  | <i>TMPRSS6</i> | rs2235321  | A | GENO_2DF | 1577 | NA     | NA    | NA     | NA    | 0.60  | 7.39E-01 |
|  | <i>TMPRSS6</i> | rs855791   | A | HOM      | 1822 | -0.040 | 0.025 | -0.088 | 0.008 | -1.62 | 1.06E-01 |
|  | <i>TMPRSS6</i> | rs855791   | A | HET      | 1822 | -0.031 | 0.020 | -0.070 | 0.008 | -1.57 | 1.18E-01 |
|  | <i>TMPRSS6</i> | rs855791   | A | GENO_2DF | 1822 | NA     | NA    | NA     | NA    | 3.36  | 1.86E-01 |
|  | <i>TMPRSS6</i> | rs5756504  | T | HOM      | 1621 | 0.017  | 0.031 | -0.044 | 0.078 | 0.55  | 5.85E-01 |
|  | <i>TMPRSS6</i> | rs5756504  | T | HET      | 1621 | 0.012  | 0.019 | -0.026 | 0.050 | 0.62  | 5.32E-01 |
|  | <i>TMPRSS6</i> | rs5756504  | T | GENO_2DF | 1621 | NA     | NA    | NA     | NA    | 0.52  | 7.71E-01 |
|  | <i>TMPRSS6</i> | rs5756505  | C | HOM      | 1665 | 0.025  | 0.029 | -0.032 | 0.081 | 0.86  | 3.92E-01 |
|  | <i>TMPRSS6</i> | rs5756505  | C | HET      | 1665 | 0.016  | 0.019 | -0.022 | 0.053 | 0.81  | 4.18E-01 |
|  | <i>TMPRSS6</i> | rs5756505  | C | GENO_2DF | 1665 | NA     | NA    | NA     | NA    | 1.01  | 6.04E-01 |
|  | <i>TMPRSS6</i> | rs5756506  | C | HOM      | 1653 | 0.020  | 0.030 | -0.040 | 0.079 | 0.65  | 5.17E-01 |
|  | <i>TMPRSS6</i> | rs5756506  | C | HET      | 1653 | 0.011  | 0.019 | -0.026 | 0.049 | 0.58  | 5.59E-01 |
|  | <i>TMPRSS6</i> | rs5756506  | C | GENO_2DF | 1653 | NA     | NA    | NA     | NA    | 0.57  | 7.52E-01 |
|  | <i>TMPRSS6</i> | rs4820268  | G | HOM      | 1817 | -0.037 | 0.025 | -0.085 | 0.012 | -1.48 | 1.39E-01 |
|  | <i>TMPRSS6</i> | rs4820268  | G | HET      | 1817 | -0.017 | 0.020 | -0.057 | 0.022 | -0.85 | 3.94E-01 |
|  | <i>TMPRSS6</i> | rs4820268  | G | GENO_2DF | 1817 | NA     | NA    | NA     | NA    | 2.20  | 3.34E-01 |
|  | <i>TMPRSS6</i> | rs13055107 | A | HOM      | 1621 | 0.042  | 0.077 | -0.110 | 0.194 | 0.55  | 5.85E-01 |
|  | <i>TMPRSS6</i> | rs13055107 | A | HET      | 1621 | 0.004  | 0.022 | -0.040 | 0.048 | 0.17  | 8.62E-01 |
|  | <i>TMPRSS6</i> | rs13055107 | A | GENO_2DF | 1621 | NA     | NA    | NA     | NA    | 0.32  | 8.53E-01 |

|  |                |            |   |          |      |        |       |        |       |       |          |
|--|----------------|------------|---|----------|------|--------|-------|--------|-------|-------|----------|
|  | <i>TMPRSS6</i> | rs2413450  | T | HOM      | 1735 | -0.032 | 0.026 | -0.083 | 0.018 | -1.25 | 2.10E-01 |
|  | <i>TMPRSS6</i> | rs2413450  | T | HET      | 1735 | -0.025 | 0.021 | -0.065 | 0.016 | -1.21 | 2.29E-01 |
|  | <i>TMPRSS6</i> | rs2413450  | T | GENO_2DF | 1735 | NA     | NA    | NA     | NA    | 1.99  | 3.70E-01 |
|  | <i>TMPRSS6</i> | rs855789   | C | HOM      | 1817 | 0.265  | 0.258 | -0.241 | 0.770 | 1.03  | 3.05E-01 |
|  | <i>TMPRSS6</i> | rs855789   | C | HET      | 1817 | -0.007 | 0.029 | -0.065 | 0.050 | -0.25 | 8.01E-01 |
|  | <i>TMPRSS6</i> | rs855789   | C | GENO_2DF | 1817 | NA     | NA    | NA     | NA    | 1.12  | 5.70E-01 |
|  | <i>TMPRSS6</i> | rs855788   | A | HOM      | 1821 | 0.008  | 0.027 | -0.045 | 0.060 | 0.28  | 7.77E-01 |
|  | <i>TMPRSS6</i> | rs855788   | A | HET      | 1821 | 0.002  | 0.019 | -0.035 | 0.038 | 0.10  | 9.20E-01 |
|  | <i>TMPRSS6</i> | rs855788   | A | GENO_2DF | 1821 | NA     | NA    | NA     | NA    | 0.08  | 9.61E-01 |
|  | <i>TMPRSS6</i> | rs17750017 | A | HOM      | 1807 | NA     | NA    | NA     | NA    | NA    | NA       |
|  | <i>TMPRSS6</i> | rs17750017 | A | HET      | 1807 | NA     | NA    | NA     | NA    | NA    | NA       |
|  | <i>TMPRSS6</i> | rs17750017 | A | GENO_2DF | 1807 | NA     | NA    | NA     | NA    | NA    | NA       |
|  | <i>TMPRSS6</i> | rs2743820  | C | HOM      | 1591 | 0.021  | 0.030 | -0.037 | 0.079 | 0.71  | 4.76E-01 |
|  | <i>TMPRSS6</i> | rs2743820  | C | HET      | 1591 | 0.001  | 0.019 | -0.037 | 0.040 | 0.07  | 9.40E-01 |
|  | <i>TMPRSS6</i> | rs2743820  | C | GENO_2DF | 1591 | NA     | NA    | NA     | NA    | 0.55  | 7.61E-01 |
|  | <i>TMPRSS6</i> | rs1005478  | A | HOM      | 1551 | -0.029 | 0.029 | -0.085 | 0.028 | -0.98 | 3.25E-01 |
|  | <i>TMPRSS6</i> | rs1005478  | A | HET      | 1551 | -0.002 | 0.020 | -0.041 | 0.037 | -0.09 | 9.29E-01 |
|  | <i>TMPRSS6</i> | rs1005478  | A | GENO_2DF | 1551 | NA     | NA    | NA     | NA    | 1.05  | 5.93E-01 |
|  | <i>TMPRSS6</i> | rs7286184  | G | HOM      | 1562 | -0.036 | 0.042 | -0.119 | 0.047 | -0.85 | 3.97E-01 |
|  | <i>TMPRSS6</i> | rs7286184  | G | HET      | 1562 | -0.011 | 0.020 | -0.050 | 0.027 | -0.56 | 5.73E-01 |
|  | <i>TMPRSS6</i> | rs7286184  | G | GENO_2DF | 1562 | NA     | NA    | NA     | NA    | 0.90  | 6.36E-01 |
|  | <i>TMPRSS6</i> | rs2246092  | G | HOM      | 1550 | -0.026 | 0.029 | -0.083 | 0.030 | -0.92 | 3.60E-01 |
|  | <i>TMPRSS6</i> | rs2246092  | G | HET      | 1550 | -0.005 | 0.020 | -0.044 | 0.034 | -0.24 | 8.11E-01 |
|  | <i>TMPRSS6</i> | rs2246092  | G | GENO_2DF | 1550 | NA     | NA    | NA     | NA    | 0.85  | 6.54E-01 |
|  | <i>TMPRSS6</i> | rs2543519  | G | HOM      | 1576 | 0.014  | 0.038 | -0.060 | 0.088 | 0.37  | 7.10E-01 |
|  | <i>TMPRSS6</i> | rs2543519  | G | HET      | 1576 | -0.021 | 0.019 | -0.059 | 0.017 | -1.09 | 2.75E-01 |
|  | <i>TMPRSS6</i> | rs2543519  | G | GENO_2DF | 1576 | NA     | NA    | NA     | NA    | 1.56  | 4.58E-01 |
|  | <i>TMPRSS6</i> | rs2111833  | T | HOM      | 1614 | 0.018  | 0.029 | -0.039 | 0.076 | 0.63  | 5.30E-01 |
|  | <i>TMPRSS6</i> | rs2111833  | T | HET      | 1614 | -0.007 | 0.019 | -0.045 | 0.031 | -0.36 | 7.18E-01 |
|  | <i>TMPRSS6</i> | rs2111833  | T | GENO_2DF | 1614 | NA     | NA    | NA     | NA    | 0.78  | 6.76E-01 |
|  | <i>TMPRSS6</i> | rs2179229  | G | HOM      | 1566 | -0.018 | 0.029 | -0.074 | 0.038 | -0.62 | 5.34E-01 |
|  | <i>TMPRSS6</i> | rs2179229  | G | HET      | 1566 | -0.004 | 0.020 | -0.043 | 0.035 | -0.19 | 8.50E-01 |
|  | <i>TMPRSS6</i> | rs2179229  | G | GENO_2DF | 1566 | NA     | NA    | NA     | NA    | 0.39  | 8.24E-01 |

|  |                |           |   |          |      |        |       |        |       |       |          |
|--|----------------|-----------|---|----------|------|--------|-------|--------|-------|-------|----------|
|  | <i>TMPRSS6</i> | rs2235323 | C | HOM      | 1819 | 0.023  | 0.027 | -0.030 | 0.076 | 0.84  | 3.99E-01 |
|  | <i>TMPRSS6</i> | rs2235323 | C | HET      | 1819 | -0.010 | 0.018 | -0.046 | 0.026 | -0.53 | 5.94E-01 |
|  | <i>TMPRSS6</i> | rs2235323 | C | GENO_2DF | 1819 | NA     | NA    | NA     | NA    | 1.57  | 4.56E-01 |
|  | <i>TMPRSS6</i> | rs2235324 | C | HOM      | 1821 | 0.023  | 0.027 | -0.030 | 0.076 | 0.85  | 3.93E-01 |
|  | <i>TMPRSS6</i> | rs2235324 | C | HET      | 1821 | -0.010 | 0.018 | -0.046 | 0.026 | -0.54 | 5.90E-01 |
|  | <i>TMPRSS6</i> | rs2235324 | C | GENO_2DF | 1821 | NA     | NA    | NA     | NA    | 1.61  | 4.47E-01 |
|  | <i>TMPRSS6</i> | rs736852  | C | HOM      | 1807 | 0.023  | 0.026 | -0.028 | 0.074 | 0.88  | 3.79E-01 |
|  | <i>TMPRSS6</i> | rs736852  | C | HET      | 1807 | -0.001 | 0.019 | -0.038 | 0.036 | -0.04 | 9.70E-01 |
|  | <i>TMPRSS6</i> | rs736852  | C | GENO_2DF | 1807 | NA     | NA    | NA     | NA    | 0.98  | 6.13E-01 |
|  | <i>TMPRSS6</i> | rs2019848 | A | HOM      | 1757 | -0.002 | 0.040 | -0.080 | 0.076 | -0.06 | 9.52E-01 |
|  | <i>TMPRSS6</i> | rs2019848 | A | HET      | 1757 | -0.017 | 0.019 | -0.053 | 0.020 | -0.90 | 3.66E-01 |
|  | <i>TMPRSS6</i> | rs2019848 | A | GENO_2DF | 1757 | NA     | NA    | NA     | NA    | 0.83  | 6.62E-01 |
|  | <i>TMPRSS6</i> | rs1421312 | G | HOM      | 1821 | 0.023  | 0.027 | -0.029 | 0.075 | 0.88  | 3.80E-01 |
|  | <i>TMPRSS6</i> | rs1421312 | G | HET      | 1821 | -0.008 | 0.019 | -0.044 | 0.028 | -0.43 | 6.69E-01 |
|  | <i>TMPRSS6</i> | rs1421312 | G | GENO_2DF | 1821 | NA     | NA    | NA     | NA    | 1.48  | 4.78E-01 |
|  | <i>TMPRSS6</i> | rs2543514 | C | HOM      | 1812 | 0.023  | 0.026 | -0.028 | 0.074 | 0.88  | 3.81E-01 |
|  | <i>TMPRSS6</i> | rs2543514 | C | HET      | 1812 | -0.001 | 0.019 | -0.038 | 0.036 | -0.04 | 9.68E-01 |
|  | <i>TMPRSS6</i> | rs2543514 | C | GENO_2DF | 1812 | NA     | NA    | NA     | NA    | 0.98  | 6.14E-01 |
|  | <i>TMPRSS6</i> | rs2543513 | G | HOM      | 1812 | 0.023  | 0.026 | -0.028 | 0.074 | 0.88  | 3.81E-01 |
|  | <i>TMPRSS6</i> | rs2543513 | G | HET      | 1812 | -0.001 | 0.019 | -0.038 | 0.036 | -0.04 | 9.68E-01 |
|  | <i>TMPRSS6</i> | rs2543513 | G | GENO_2DF | 1812 | NA     | NA    | NA     | NA    | 0.98  | 6.14E-01 |
|  | <i>TMPRSS6</i> | rs2413451 | G | HOM      | 1812 | 0.023  | 0.026 | -0.028 | 0.074 | 0.88  | 3.81E-01 |
|  | <i>TMPRSS6</i> | rs2413451 | G | HET      | 1812 | -0.001 | 0.019 | -0.038 | 0.036 | -0.04 | 9.68E-01 |
|  | <i>TMPRSS6</i> | rs2413451 | G | GENO_2DF | 1812 | NA     | NA    | NA     | NA    | 0.98  | 6.14E-01 |
|  | <i>TMPRSS6</i> | rs2251655 | T | HOM      | 1812 | 0.023  | 0.026 | -0.028 | 0.074 | 0.88  | 3.81E-01 |
|  | <i>TMPRSS6</i> | rs2251655 | T | HET      | 1812 | -0.001 | 0.019 | -0.038 | 0.036 | -0.04 | 9.68E-01 |
|  | <i>TMPRSS6</i> | rs2251655 | T | GENO_2DF | 1812 | NA     | NA    | NA     | NA    | 0.98  | 6.14E-01 |
|  | <i>TMPRSS6</i> | rs2743824 | C | HOM      | 1810 | 0.023  | 0.026 | -0.028 | 0.074 | 0.89  | 3.76E-01 |
|  | <i>TMPRSS6</i> | rs2743824 | C | HET      | 1810 | -0.001 | 0.019 | -0.038 | 0.036 | -0.05 | 9.61E-01 |
|  | <i>TMPRSS6</i> | rs2743824 | C | GENO_2DF | 1810 | NA     | NA    | NA     | NA    | 1.00  | 6.05E-01 |
|  | <i>TMPRSS6</i> | rs2543509 | G | HOM      | 1810 | 0.023  | 0.026 | -0.028 | 0.074 | 0.89  | 3.76E-01 |
|  | <i>TMPRSS6</i> | rs2543509 | G | HET      | 1810 | -0.001 | 0.019 | -0.038 | 0.036 | -0.05 | 9.61E-01 |
|  | <i>TMPRSS6</i> | rs2543509 | G | GENO_2DF | 1810 | NA     | NA    | NA     | NA    | 1.00  | 6.05E-01 |

|  |                |           |   |          |      |        |       |        |       |       |          |
|--|----------------|-----------|---|----------|------|--------|-------|--------|-------|-------|----------|
|  | <i>TMPRSS6</i> | rs2743825 | G | HOM      | 1809 | 0.023  | 0.026 | -0.028 | 0.074 | 0.89  | 3.76E-01 |
|  | <i>TMPRSS6</i> | rs2743825 | G | HET      | 1809 | -0.001 | 0.019 | -0.038 | 0.036 | -0.06 | 9.53E-01 |
|  | <i>TMPRSS6</i> | rs2743825 | G | GENO_2DF | 1809 | NA     | NA    | NA     | NA    | 1.02  | 6.02E-01 |
|  | <i>TMPRSS6</i> | rs2160906 | A | HOM      | 1821 | 0.009  | 0.037 | -0.063 | 0.081 | 0.24  | 8.07E-01 |
|  | <i>TMPRSS6</i> | rs2160906 | A | HET      | 1821 | -0.018 | 0.018 | -0.053 | 0.018 | -0.98 | 3.27E-01 |
|  | <i>TMPRSS6</i> | rs2160906 | A | GENO_2DF | 1821 | NA     | NA    | NA     | NA    | 1.15  | 5.62E-01 |
|  | <i>TMPRSS6</i> | rs732755  | C | HOM      | 1745 | 0.009  | 0.037 | -0.063 | 0.081 | 0.24  | 8.14E-01 |
|  | <i>TMPRSS6</i> | rs732755  | C | HET      | 1745 | -0.021 | 0.018 | -0.057 | 0.015 | -1.14 | 2.54E-01 |
|  | <i>TMPRSS6</i> | rs732755  | C | GENO_2DF | 1745 | NA     | NA    | NA     | NA    | 1.52  | 4.67E-01 |
|  | <i>TMPRSS6</i> | rs8139988 | C | HOM      | 1798 | 0.011  | 0.037 | -0.062 | 0.083 | 0.29  | 7.68E-01 |
|  | <i>TMPRSS6</i> | rs8139988 | C | HET      | 1798 | -0.017 | 0.018 | -0.053 | 0.018 | -0.95 | 3.42E-01 |
|  | <i>TMPRSS6</i> | rs8139988 | C | GENO_2DF | 1798 | NA     | NA    | NA     | NA    | 1.14  | 5.67E-01 |
|  | <i>TMPRSS6</i> | rs2017764 | A | HOM      | 1789 | 0.023  | 0.027 | -0.030 | 0.076 | 0.86  | 3.91E-01 |
|  | <i>TMPRSS6</i> | rs2017764 | A | HET      | 1789 | -0.008 | 0.019 | -0.045 | 0.028 | -0.45 | 6.56E-01 |
|  | <i>TMPRSS6</i> | rs2017764 | A | GENO_2DF | 1789 | NA     | NA    | NA     | NA    | 1.44  | 4.87E-01 |
|  | <i>TMPRSS6</i> | rs733655  | C | HOM      | 1791 | 0.022  | 0.034 | -0.045 | 0.090 | 0.64  | 5.21E-01 |
|  | <i>TMPRSS6</i> | rs733655  | C | HET      | 1791 | -0.024 | 0.018 | -0.059 | 0.012 | -1.30 | 1.94E-01 |
|  | <i>TMPRSS6</i> | rs733655  | C | GENO_2DF | 1791 | NA     | NA    | NA     | NA    | 2.57  | 2.76E-01 |
|  | <i>TMPRSS6</i> | rs2281090 | A | HOM      | 1793 | 0.007  | 0.037 | -0.067 | 0.080 | 0.18  | 8.56E-01 |
|  | <i>TMPRSS6</i> | rs2281090 | A | HET      | 1793 | -0.017 | 0.018 | -0.053 | 0.018 | -0.95 | 3.44E-01 |
|  | <i>TMPRSS6</i> | rs2281090 | A | GENO_2DF | 1793 | NA     | NA    | NA     | NA    | 1.03  | 5.98E-01 |
|  | <i>TMPRSS6</i> | rs2281091 | T | HOM      | 1791 | 0.010  | 0.038 | -0.063 | 0.084 | 0.28  | 7.83E-01 |
|  | <i>TMPRSS6</i> | rs2281091 | T | HET      | 1791 | -0.017 | 0.018 | -0.053 | 0.019 | -0.94 | 3.49E-01 |
|  | <i>TMPRSS6</i> | rs2281091 | T | GENO_2DF | 1791 | NA     | NA    | NA     | NA    | 1.09  | 5.81E-01 |
|  | <i>TMPRSS6</i> | rs228906  | A | HOM      | 1822 | -0.005 | 0.027 | -0.058 | 0.048 | -0.20 | 8.43E-01 |
|  | <i>TMPRSS6</i> | rs228906  | A | HET      | 1822 | -0.012 | 0.018 | -0.048 | 0.024 | -0.65 | 5.14E-01 |
|  | <i>TMPRSS6</i> | rs228906  | A | GENO_2DF | 1822 | NA     | NA    | NA     | NA    | 0.43  | 8.07E-01 |
|  | <i>TMPRSS6</i> | rs7289616 | A | HOM      | 1767 | 0.030  | 0.027 | -0.024 | 0.083 | 1.08  | 2.81E-01 |
|  | <i>TMPRSS6</i> | rs7289616 | A | HET      | 1767 | -0.008 | 0.019 | -0.044 | 0.029 | -0.41 | 6.80E-01 |
|  | <i>TMPRSS6</i> | rs7289616 | A | GENO_2DF | 1767 | NA     | NA    | NA     | NA    | 1.95  | 3.77E-01 |
|  | <i>TMPRSS6</i> | rs9619658 | T | HOM      | 1459 | 0.040  | 0.033 | -0.025 | 0.105 | 1.20  | 2.30E-01 |
|  | <i>TMPRSS6</i> | rs9619658 | T | HET      | 1459 | -0.004 | 0.020 | -0.043 | 0.035 | -0.20 | 8.42E-01 |
|  | <i>TMPRSS6</i> | rs9619658 | T | GENO_2DF | 1459 | NA     | NA    | NA     | NA    | 1.79  | 4.10E-01 |



|  |                |            |   |          |      |        |       |        |       |       |          |
|--|----------------|------------|---|----------|------|--------|-------|--------|-------|-------|----------|
|  | <i>TMPRSS6</i> | rs228907   | A | HOM      | 1819 | -0.020 | 0.032 | -0.082 | 0.043 | -0.61 | 5.42E-01 |
|  | <i>TMPRSS6</i> | rs228907   | A | HET      | 1819 | -0.007 | 0.018 | -0.043 | 0.028 | -0.40 | 6.93E-01 |
|  | <i>TMPRSS6</i> | rs228907   | A | GENO_2DF | 1819 | NA     | NA    | NA     | NA    | 0.44  | 8.03E-01 |
|  | <i>TMPRSS6</i> | rs17750152 | T | HOM      | 1079 | 0.061  | 0.053 | -0.043 | 0.164 | 1.15  | 2.49E-01 |
|  | <i>TMPRSS6</i> | rs17750152 | T | HET      | 1079 | 0.010  | 0.024 | -0.037 | 0.057 | 0.43  | 6.69E-01 |
|  | <i>TMPRSS6</i> | rs17750152 | T | GENO_2DF | 1079 | NA     | NA    | NA     | NA    | 1.39  | 4.99E-01 |
|  | <i>TMPRSS6</i> | rs4140590  | A | HOM      | 1586 | -0.015 | 0.027 | -0.068 | 0.037 | -0.56 | 5.74E-01 |
|  | <i>TMPRSS6</i> | rs4140590  | A | HET      | 1586 | -0.005 | 0.021 | -0.046 | 0.035 | -0.26 | 7.93E-01 |
|  | <i>TMPRSS6</i> | rs4140590  | A | GENO_2DF | 1586 | NA     | NA    | NA     | NA    | 0.32  | 8.54E-01 |
|  | <i>TMPRSS6</i> | rs4140589  | A | HOM      | 1619 | -0.014 | 0.027 | -0.066 | 0.038 | -0.53 | 6.00E-01 |
|  | <i>TMPRSS6</i> | rs4140589  | A | HET      | 1619 | -0.006 | 0.021 | -0.046 | 0.035 | -0.28 | 7.77E-01 |
|  | <i>TMPRSS6</i> | rs4140589  | A | GENO_2DF | 1619 | NA     | NA    | NA     | NA    | 0.28  | 8.71E-01 |
|  | <i>TMPRSS6</i> | rs5995380  | T | HOM      | 1699 | 0.060  | 0.049 | -0.037 | 0.156 | 1.22  | 2.24E-01 |
|  | <i>TMPRSS6</i> | rs5995380  | T | HET      | 1699 | 0.006  | 0.020 | -0.032 | 0.045 | 0.32  | 7.45E-01 |
|  | <i>TMPRSS6</i> | rs5995380  | T | GENO_2DF | 1699 | NA     | NA    | NA     | NA    | 1.51  | 4.70E-01 |
|  | <i>TMPRSS6</i> | rs11704654 | T | HOM      | 1741 | 0.049  | 0.047 | -0.043 | 0.140 | 1.04  | 3.01E-01 |
|  | <i>TMPRSS6</i> | rs11704654 | T | HET      | 1741 | 0.000  | 0.019 | -0.037 | 0.038 | 0.01  | 9.89E-01 |
|  | <i>TMPRSS6</i> | rs11704654 | T | GENO_2DF | 1741 | NA     | NA    | NA     | NA    | 1.09  | 5.81E-01 |
|  | <i>TMPRSS6</i> | rs5756515  | G | HOM      | 1701 | -0.013 | 0.026 | -0.064 | 0.038 | -0.50 | 6.16E-01 |
|  | <i>TMPRSS6</i> | rs5756515  | G | HET      | 1701 | -0.007 | 0.020 | -0.046 | 0.032 | -0.35 | 7.28E-01 |
|  | <i>TMPRSS6</i> | rs5756515  | G | GENO_2DF | 1701 | NA     | NA    | NA     | NA    | 0.27  | 8.75E-01 |
|  | <i>TMPRSS6</i> | rs5756516  | T | HOM      | 1701 | -0.013 | 0.026 | -0.064 | 0.038 | -0.50 | 6.16E-01 |
|  | <i>TMPRSS6</i> | rs5756516  | T | HET      | 1701 | -0.007 | 0.020 | -0.046 | 0.032 | -0.35 | 7.28E-01 |
|  | <i>TMPRSS6</i> | rs5756516  | T | GENO_2DF | 1701 | NA     | NA    | NA     | NA    | 0.27  | 8.75E-01 |
|  | <i>TMPRSS6</i> | rs228909   | G | HOM      | 1821 | 0.039  | 0.042 | -0.044 | 0.122 | 0.91  | 3.61E-01 |
|  | <i>TMPRSS6</i> | rs228909   | G | HET      | 1821 | -0.003 | 0.019 | -0.040 | 0.033 | -0.18 | 8.59E-01 |
|  | <i>TMPRSS6</i> | rs228909   | G | GENO_2DF | 1821 | NA     | NA    | NA     | NA    | 0.93  | 6.28E-01 |
|  | <i>TMPRSS6</i> | rs228910   | A | HOM      | 1821 | -0.002 | 0.026 | -0.053 | 0.049 | -0.07 | 9.44E-01 |
|  | <i>TMPRSS6</i> | rs228910   | A | HET      | 1821 | -0.008 | 0.019 | -0.045 | 0.028 | -0.45 | 6.52E-01 |
|  | <i>TMPRSS6</i> | rs228910   | A | GENO_2DF | 1821 | NA     | NA    | NA     | NA    | 0.22  | 8.98E-01 |
|  | <i>TMPRSS6</i> | rs2235329  | C | HOM      | 1702 | -0.013 | 0.026 | -0.064 | 0.038 | -0.49 | 6.21E-01 |
|  | <i>TMPRSS6</i> | rs2235329  | C | HET      | 1702 | -0.004 | 0.020 | -0.043 | 0.035 | -0.20 | 8.45E-01 |
|  | <i>TMPRSS6</i> | rs2235329  | C | GENO_2DF | 1702 | NA     | NA    | NA     | NA    | 0.25  | 8.84E-01 |

|  |                |            |   |          |      |        |       |        |       |       |          |
|--|----------------|------------|---|----------|------|--------|-------|--------|-------|-------|----------|
|  | <i>TMPRSS6</i> | rs228913   | C | HOM      | 1821 | 0.028  | 0.047 | -0.063 | 0.120 | 0.60  | 5.45E-01 |
|  | <i>TMPRSS6</i> | rs228913   | C | HET      | 1821 | 0.016  | 0.019 | -0.021 | 0.052 | 0.84  | 4.04E-01 |
|  | <i>TMPRSS6</i> | rs228913   | C | GENO_2DF | 1821 | NA     | NA    | NA     | NA    | 0.95  | 6.21E-01 |
|  | <i>TMPRSS6</i> | rs228916   | C | HOM      | 1808 | -0.013 | 0.078 | -0.167 | 0.140 | -0.17 | 8.64E-01 |
|  | <i>TMPRSS6</i> | rs228916   | C | HET      | 1808 | 0.002  | 0.021 | -0.039 | 0.043 | 0.10  | 9.24E-01 |
|  | <i>TMPRSS6</i> | rs228916   | C | GENO_2DF | 1808 | NA     | NA    | NA     | NA    | 0.04  | 9.80E-01 |
|  | <i>TMPRSS6</i> | rs228918   | C | HOM      | 1820 | 0.014  | 0.025 | -0.034 | 0.063 | 0.58  | 5.63E-01 |
|  | <i>TMPRSS6</i> | rs228918   | C | HET      | 1820 | -0.025 | 0.019 | -0.062 | 0.012 | -1.32 | 1.86E-01 |
|  | <i>TMPRSS6</i> | rs228918   | C | GENO_2DF | 1820 | NA     | NA    | NA     | NA    | 3.43  | 1.80E-01 |
|  | <i>TMPRSS6</i> | rs228919   | T | HOM      | 1820 | 0.015  | 0.025 | -0.033 | 0.064 | 0.62  | 5.36E-01 |
|  | <i>TMPRSS6</i> | rs228919   | T | HET      | 1820 | -0.024 | 0.019 | -0.062 | 0.013 | -1.28 | 2.00E-01 |
|  | <i>TMPRSS6</i> | rs228919   | T | GENO_2DF | 1820 | NA     | NA    | NA     | NA    | 3.39  | 1.84E-01 |
|  | <i>TMPRSS6</i> | rs2092169  | T | HOM      | 1140 | 0.072  | 0.152 | -0.225 | 0.370 | 0.48  | 6.33E-01 |
|  | <i>TMPRSS6</i> | rs2092169  | T | HET      | 1140 | -0.038 | 0.031 | -0.099 | 0.022 | -1.24 | 2.15E-01 |
|  | <i>TMPRSS6</i> | rs2092169  | T | GENO_2DF | 1140 | NA     | NA    | NA     | NA    | 1.81  | 4.06E-01 |
|  | <i>TMPRSS6</i> | rs228921   | G | HOM      | 1819 | 0.015  | 0.025 | -0.033 | 0.064 | 0.62  | 5.36E-01 |
|  | <i>TMPRSS6</i> | rs228921   | G | HET      | 1819 | -0.024 | 0.019 | -0.062 | 0.013 | -1.28 | 2.00E-01 |
|  | <i>TMPRSS6</i> | rs228921   | G | GENO_2DF | 1819 | NA     | NA    | NA     | NA    | 3.38  | 1.85E-01 |
|  | <i>TMPRSS6</i> | rs3076475  | T | HOM      | 1078 | 0.063  | 0.054 | -0.043 | 0.169 | 1.17  | 2.42E-01 |
|  | <i>TMPRSS6</i> | rs3076475  | T | HET      | 1078 | -0.003 | 0.024 | -0.050 | 0.044 | -0.13 | 8.95E-01 |
|  | <i>TMPRSS6</i> | rs3076475  | T | GENO_2DF | 1078 | NA     | NA    | NA     | NA    | 1.47  | 4.79E-01 |
|  | <i>TMPRSS6</i> | rs228924   | A | HOM      | 1821 | -0.014 | 0.078 | -0.167 | 0.140 | -0.17 | 8.62E-01 |
|  | <i>TMPRSS6</i> | rs228924   | A | HET      | 1821 | -0.004 | 0.021 | -0.045 | 0.036 | -0.20 | 8.41E-01 |
|  | <i>TMPRSS6</i> | rs228924   | A | GENO_2DF | 1821 | NA     | NA    | NA     | NA    | 0.07  | 9.67E-01 |
|  | <i>TMPRSS6</i> | rs228925   | A | HOM      | 1139 | 0.000  | 0.049 | -0.097 | 0.096 | 0.00  | 9.96E-01 |
|  | <i>TMPRSS6</i> | rs228925   | A | HET      | 1139 | -0.033 | 0.023 | -0.079 | 0.013 | -1.42 | 1.55E-01 |
|  | <i>TMPRSS6</i> | rs228925   | A | GENO_2DF | 1139 | NA     | NA    | NA     | NA    | 2.09  | 3.52E-01 |
|  | <i>TMPRSS6</i> | rs5756520  | A | HOM      | 1817 | 0.015  | 0.025 | -0.033 | 0.064 | 0.62  | 5.36E-01 |
|  | <i>TMPRSS6</i> | rs5756520  | A | HET      | 1817 | -0.025 | 0.019 | -0.062 | 0.013 | -1.30 | 1.93E-01 |
|  | <i>TMPRSS6</i> | rs5756520  | A | GENO_2DF | 1817 | NA     | NA    | NA     | NA    | 3.46  | 1.78E-01 |
|  | <i>TMPRSS6</i> | rs11914132 | T | HOM      | 1822 | 0.037  | 0.035 | -0.032 | 0.107 | 1.06  | 2.90E-01 |
|  | <i>TMPRSS6</i> | rs11914132 | T | HET      | 1822 | -0.033 | 0.018 | -0.069 | 0.003 | -1.82 | 6.85E-02 |
|  | <i>TMPRSS6</i> | rs11914132 | T | GENO_2DF | 1822 | NA     | NA    | NA     | NA    | 5.36  | 6.87E-02 |

|      |                |            |   |          |      |        |       |        |       |       |          |
|------|----------------|------------|---|----------|------|--------|-------|--------|-------|-------|----------|
|      | <i>TMPRSS6</i> | rs738297   | C | HOM      | 1810 | 0.019  | 0.048 | -0.075 | 0.112 | 0.39  | 6.98E-01 |
|      | <i>TMPRSS6</i> | rs738297   | C | HET      | 1810 | 0.014  | 0.019 | -0.023 | 0.051 | 0.74  | 4.60E-01 |
|      | <i>TMPRSS6</i> | rs738297   | C | GENO_2DF | 1810 | NA     | NA    | NA     | NA    | 0.64  | 7.27E-01 |
|      | <i>TMPRSS6</i> | rs11089823 | C | HOM      | 1813 | 0.034  | 0.035 | -0.035 | 0.104 | 0.97  | 3.31E-01 |
|      | <i>TMPRSS6</i> | rs11089823 | C | HET      | 1813 | -0.035 | 0.018 | -0.071 | 0.001 | -1.89 | 5.87E-02 |
|      | <i>TMPRSS6</i> | rs11089823 | C | GENO_2DF | 1813 | NA     | NA    | NA     | NA    | 5.41  | 6.70E-02 |
|      | <i>TMPRSS6</i> | rs11089824 | C | HOM      | 1813 | 0.034  | 0.035 | -0.035 | 0.104 | 0.97  | 3.31E-01 |
|      | <i>TMPRSS6</i> | rs11089824 | C | HET      | 1813 | -0.035 | 0.018 | -0.071 | 0.001 | -1.89 | 5.87E-02 |
|      | <i>TMPRSS6</i> | rs11089824 | C | GENO_2DF | 1813 | NA     | NA    | NA     | NA    | 5.41  | 6.70E-02 |
| iron | <i>HFE</i>     | rs9295687  | C | HOM      | 1745 | 1.759  | 0.372 | 1.029  | 2.488 | 4.73  | 2.48E-06 |
|      | <i>HFE</i>     | rs9295687  | C | HET      | 1745 | 0.532  | 0.278 | -0.013 | 1.077 | 1.91  | 5.58E-02 |
|      | <i>HFE</i>     | rs9295687  | C | GENO_2DF | 1745 | NA     | NA    | NA     | NA    | 22.33 | 1.41E-05 |
|      | <i>HFE</i>     | rs4529296  | G | HOM      | 1745 | 1.759  | 0.372 | 1.029  | 2.488 | 4.73  | 2.48E-06 |
|      | <i>HFE</i>     | rs4529296  | G | HET      | 1745 | 0.532  | 0.278 | -0.013 | 1.077 | 1.91  | 5.58E-02 |
|      | <i>HFE</i>     | rs4529296  | G | GENO_2DF | 1745 | NA     | NA    | NA     | NA    | 22.33 | 1.41E-05 |
|      | <i>HFE</i>     | rs9379825  | A | HOM      | 1745 | 1.759  | 0.372 | 1.029  | 2.488 | 4.73  | 2.48E-06 |
|      | <i>HFE</i>     | rs9379825  | A | HET      | 1745 | 0.532  | 0.278 | -0.013 | 1.077 | 1.91  | 5.58E-02 |
|      | <i>HFE</i>     | rs9379825  | A | GENO_2DF | 1745 | NA     | NA    | NA     | NA    | 22.33 | 1.41E-05 |
|      | <i>HFE</i>     | rs9467672  | T | HOM      | 1745 | 1.759  | 0.372 | 1.029  | 2.488 | 4.73  | 2.48E-06 |
|      | <i>HFE</i>     | rs9467672  | T | HET      | 1745 | 0.532  | 0.278 | -0.013 | 1.077 | 1.91  | 5.58E-02 |
|      | <i>HFE</i>     | rs9467672  | T | GENO_2DF | 1745 | NA     | NA    | NA     | NA    | 22.33 | 1.41E-05 |
|      | <i>HFE</i>     | rs9295688  | A | HOM      | 1744 | 1.710  | 0.372 | 0.981  | 2.439 | 4.60  | 4.57E-06 |
|      | <i>HFE</i>     | rs9295688  | A | HET      | 1744 | 0.533  | 0.278 | -0.011 | 1.077 | 1.92  | 5.48E-02 |
|      | <i>HFE</i>     | rs9295688  | A | GENO_2DF | 1744 | NA     | NA    | NA     | NA    | 21.15 | 2.56E-05 |
|      | <i>HFE</i>     | rs2006736  | T | HOM      | 1744 | 1.710  | 0.372 | 0.981  | 2.439 | 4.60  | 4.57E-06 |
|      | <i>HFE</i>     | rs2006736  | T | HET      | 1744 | 0.533  | 0.278 | -0.011 | 1.077 | 1.92  | 5.48E-02 |
|      | <i>HFE</i>     | rs2006736  | T | GENO_2DF | 1744 | NA     | NA    | NA     | NA    | 21.15 | 2.56E-05 |
|      | <i>HFE</i>     | rs1800702  | G | HOM      | 1744 | 1.710  | 0.372 | 0.981  | 2.439 | 4.60  | 4.57E-06 |
|      | <i>HFE</i>     | rs1800702  | G | HET      | 1744 | 0.533  | 0.278 | -0.011 | 1.077 | 1.92  | 5.48E-02 |
|      | <i>HFE</i>     | rs1800702  | G | GENO_2DF | 1744 | NA     | NA    | NA     | NA    | 21.15 | 2.56E-05 |
|      | <i>HFE</i>     | rs2794720  | C | HOM      | 1744 | 1.710  | 0.372 | 0.981  | 2.439 | 4.60  | 4.57E-06 |
|      | <i>HFE</i>     | rs2794720  | C | HET      | 1744 | 0.533  | 0.278 | -0.011 | 1.077 | 1.92  | 5.48E-02 |
|      | <i>HFE</i>     | rs2794720  | C | GENO_2DF | 1744 | NA     | NA    | NA     | NA    | 21.15 | 2.56E-05 |

|  |     |           |   |          |      |        |       |        |        |       |          |
|--|-----|-----------|---|----------|------|--------|-------|--------|--------|-------|----------|
|  | HFE | rs2794719 | G | HOM      | 1744 | 1.710  | 0.372 | 0.981  | 2.439  | 4.60  | 4.57E-06 |
|  | HFE | rs2794719 | G | HET      | 1744 | 0.533  | 0.278 | -0.011 | 1.077  | 1.92  | 5.48E-02 |
|  | HFE | rs2794719 | G | GENO_2DF | 1744 | NA     | NA    | NA     | NA     | 21.15 | 2.56E-05 |
|  | HFE | rs9366637 | T | HOM      | 1804 | -5.077 | 2.019 | -9.033 | -1.121 | -2.52 | 1.20E-02 |
|  | HFE | rs9366637 | T | HET      | 1804 | -0.979 | 0.410 | -1.782 | -0.176 | -2.39 | 1.69E-02 |
|  | HFE | rs9366637 | T | GENO_2DF | 1804 | NA     | NA    | NA     | NA     | 11.78 | 2.77E-03 |
|  | HFE | rs1799945 | G | HOM      | 1755 | 1.147  | 0.733 | -0.291 | 2.584  | 1.56  | 1.18E-01 |
|  | HFE | rs1799945 | G | HET      | 1755 | 1.065  | 0.298 | 0.481  | 1.650  | 3.57  | 3.64E-04 |
|  | HFE | rs1799945 | G | GENO_2DF | 1755 | NA     | NA    | NA     | NA     | 14.24 | 8.07E-04 |
|  | HFE | rs2071303 | C | HOM      | 1804 | 0.177  | 0.407 | -0.621 | 0.974  | 0.43  | 6.65E-01 |
|  | HFE | rs2071303 | C | HET      | 1804 | 0.346  | 0.269 | -0.181 | 0.874  | 1.29  | 1.98E-01 |
|  | HFE | rs2071303 | C | GENO_2DF | 1804 | NA     | NA    | NA     | NA     | 1.66  | 4.36E-01 |
|  | HFE | rs1800562 | A | HOM      | 1804 | 10.710 | 2.640 | 5.534  | 15.880 | 4.06  | 5.19E-05 |
|  | HFE | rs1800562 | A | HET      | 1804 | 2.260  | 0.386 | 1.503  | 3.017  | 5.85  | 5.74E-09 |
|  | HFE | rs1800562 | A | GENO_2DF | 1804 | NA     | NA    | NA     | NA     | 50.01 | 1.39E-11 |
|  | HFE | rs1800708 | C | HOM      | 1803 | -4.887 | 2.178 | -9.155 | -0.619 | -2.24 | 2.50E-02 |
|  | HFE | rs1800708 | C | HET      | 1803 | -1.191 | 0.402 | -1.978 | -0.404 | -2.97 | 3.07E-03 |
|  | HFE | rs1800708 | C | GENO_2DF | 1803 | NA     | NA    | NA     | NA     | 13.55 | 1.14E-03 |
|  | HFE | rs2858996 | T | HOM      | 1803 | 1.728  | 0.679 | 0.397  | 3.060  | 2.54  | 1.11E-02 |
|  | HFE | rs2858996 | T | HET      | 1803 | 0.733  | 0.268 | 0.208  | 1.258  | 2.74  | 6.30E-03 |
|  | HFE | rs2858996 | T | GENO_2DF | 1803 | NA     | NA    | NA     | NA     | 12.26 | 2.18E-03 |
|  | HFE | rs1572982 | A | HOM      | 1804 | 0.085  | 0.362 | -0.624 | 0.794  | 0.23  | 8.14E-01 |
|  | HFE | rs1572982 | A | HET      | 1804 | 0.153  | 0.293 | -0.422 | 0.728  | 0.52  | 6.03E-01 |
|  | HFE | rs1572982 | A | GENO_2DF | 1804 | NA     | NA    | NA     | NA     | 0.27  | 8.73E-01 |
|  | HFE | rs707889  | A | HOM      | 1804 | 1.728  | 0.679 | 0.397  | 3.060  | 2.55  | 1.10E-02 |
|  | HFE | rs707889  | A | HET      | 1804 | 0.733  | 0.268 | 0.208  | 1.258  | 2.74  | 6.24E-03 |
|  | HFE | rs707889  | A | GENO_2DF | 1804 | NA     | NA    | NA     | NA     | 12.28 | 2.15E-03 |
|  | HFE | rs1045537 | C | HOM      | 1753 | -1.201 | 0.948 | -3.059 | 0.658  | -1.27 | 2.06E-01 |
|  | HFE | rs1045537 | C | HET      | 1753 | -0.311 | 0.306 | -0.911 | 0.289  | -1.02 | 3.10E-01 |
|  | HFE | rs1045537 | C | GENO_2DF | 1753 | NA     | NA    | NA     | NA     | 2.46  | 2.92E-01 |
|  | HFE | rs12346   | T | HOM      | 1804 | -1.156 | 0.428 | -1.994 | -0.318 | -2.70 | 6.93E-03 |
|  | HFE | rs12346   | T | HET      | 1804 | -0.706 | 0.266 | -1.226 | -0.185 | -2.66 | 7.94E-03 |
|  | HFE | rs12346   | T | GENO_2DF | 1804 | NA     | NA    | NA     | NA     | 10.89 | 4.31E-03 |

|  |     |            |   |          |      |        |       |        |        |       |          |
|--|-----|------------|---|----------|------|--------|-------|--------|--------|-------|----------|
|  | HFE | rs17596719 | A | HOM      | 1802 | -0.217 | 1.205 | -2.578 | 2.144  | -0.18 | 8.57E-01 |
|  | HFE | rs17596719 | A | HET      | 1802 | -0.277 | 0.317 | -0.898 | 0.344  | -0.87 | 3.82E-01 |
|  | HFE | rs17596719 | A | GENO_2DF | 1802 | NA     | NA    | NA     | NA     | 0.78  | 6.76E-01 |
|  | HFE | rs6918586  | C | HOM      | 1801 | 0.678  | 0.376 | -0.059 | 1.414  | 1.80  | 7.16E-02 |
|  | HFE | rs6918586  | C | HET      | 1801 | 0.528  | 0.278 | -0.016 | 1.072  | 1.90  | 5.74E-02 |
|  | HFE | rs6918586  | C | GENO_2DF | 1801 | NA     | NA    | NA     | NA     | 4.83  | 8.93E-02 |
|  | HFE | rs9393685  | C | HOM      | 1797 | -4.883 | 2.175 | -9.146 | -0.620 | -2.25 | 2.49E-02 |
|  | HFE | rs9393685  | C | HET      | 1797 | -1.070 | 0.392 | -1.838 | -0.302 | -2.73 | 6.40E-03 |
|  | HFE | rs9393685  | C | GENO_2DF | 1797 | NA     | NA    | NA     | NA     | 12.23 | 2.21E-03 |
|  | HFE | rs1150659  | A | HOM      | 1802 | 1.554  | 0.675 | 0.232  | 2.876  | 2.30  | 2.14E-02 |
|  | HFE | rs1150659  | A | HET      | 1802 | 0.754  | 0.268 | 0.228  | 1.280  | 2.81  | 5.03E-03 |
|  | HFE | rs1150659  | A | GENO_2DF | 1802 | NA     | NA    | NA     | NA     | 11.62 | 3.00E-03 |
|  | HFE | rs1150660  | A | HOM      | 1804 | -1.156 | 0.428 | -1.994 | -0.318 | -2.70 | 6.93E-03 |
|  | HFE | rs1150660  | A | HET      | 1804 | -0.706 | 0.266 | -1.226 | -0.185 | -2.66 | 7.94E-03 |
|  | HFE | rs1150660  | A | GENO_2DF | 1804 | NA     | NA    | NA     | NA     | 10.89 | 4.31E-03 |
|  | HFE | rs198857   | G | HOM      | 1802 | 0.111  | 0.362 | -0.599 | 0.820  | 0.31  | 7.60E-01 |
|  | HFE | rs198857   | G | HET      | 1802 | 0.195  | 0.294 | -0.381 | 0.770  | 0.66  | 5.08E-01 |
|  | HFE | rs198857   | G | GENO_2DF | 1802 | NA     | NA    | NA     | NA     | 0.44  | 8.02E-01 |
|  | HFE | rs198856   | G | HOM      | 1802 | 0.111  | 0.362 | -0.599 | 0.820  | 0.31  | 7.60E-01 |
|  | HFE | rs198856   | G | HET      | 1802 | 0.195  | 0.294 | -0.381 | 0.770  | 0.66  | 5.08E-01 |
|  | HFE | rs198856   | G | GENO_2DF | 1802 | NA     | NA    | NA     | NA     | 0.44  | 8.02E-01 |
|  | HFE | rs1543680  | A | HOM      | 1798 | 1.542  | 0.680 | 0.210  | 2.874  | 2.27  | 2.34E-02 |
|  | HFE | rs1543680  | A | HET      | 1798 | 0.769  | 0.269 | 0.241  | 1.297  | 2.85  | 4.36E-03 |
|  | HFE | rs1543680  | A | GENO_2DF | 1798 | NA     | NA    | NA     | NA     | 11.74 | 2.82E-03 |
|  | HFE | rs198855   | A | HOM      | 1755 | 0.483  | 0.492 | -0.481 | 1.447  | 0.98  | 3.26E-01 |
|  | HFE | rs198855   | A | HET      | 1755 | 0.834  | 0.267 | 0.310  | 1.358  | 3.12  | 1.84E-03 |
|  | HFE | rs198855   | A | GENO_2DF | 1755 | NA     | NA    | NA     | NA     | 9.83  | 7.34E-03 |
|  | HFE | rs7743957  | C | HOM      | 1797 | -4.883 | 2.175 | -9.146 | -0.620 | -2.25 | 2.49E-02 |
|  | HFE | rs7743957  | C | HET      | 1797 | -1.070 | 0.392 | -1.838 | -0.302 | -2.73 | 6.40E-03 |
|  | HFE | rs7743957  | C | GENO_2DF | 1797 | NA     | NA    | NA     | NA     | 12.23 | 2.21E-03 |
|  | HFE | rs198854   | T | HOM      | 1803 | 0.099  | 0.362 | -0.610 | 0.808  | 0.27  | 7.84E-01 |
|  | HFE | rs198854   | T | HET      | 1803 | 0.195  | 0.294 | -0.381 | 0.770  | 0.66  | 5.08E-01 |
|  | HFE | rs198854   | T | GENO_2DF | 1803 | NA     | NA    | NA     | NA     | 0.45  | 8.00E-01 |

|  |                |           |   |          |      |        |       |        |        |       |          |
|--|----------------|-----------|---|----------|------|--------|-------|--------|--------|-------|----------|
|  | <i>HFE</i>     | rs198853  | C | HOM      | 1804 | -1.156 | 0.428 | -1.994 | -0.318 | -2.70 | 6.93E-03 |
|  | <i>HFE</i>     | rs198853  | C | HET      | 1804 | -0.706 | 0.266 | -1.226 | -0.185 | -2.66 | 7.94E-03 |
|  | <i>HFE</i>     | rs198853  | C | GENO_2DF | 1804 | NA     | NA    | NA     | NA     | 10.89 | 4.31E-03 |
|  | <i>HFE</i>     | rs2229768 | C | HOM      | 1803 | 1.557  | 0.675 | 0.235  | 2.879  | 2.31  | 2.11E-02 |
|  | <i>HFE</i>     | rs2229768 | C | HET      | 1803 | 0.757  | 0.268 | 0.232  | 1.283  | 2.82  | 4.81E-03 |
|  | <i>HFE</i>     | rs2229768 | C | GENO_2DF | 1803 | NA     | NA    | NA     | NA     | 11.71 | 2.86E-03 |
|  | <i>HFE</i>     | rs198852  | G | HOM      | 1804 | 0.000  | 0.381 | -0.746 | 0.746  | 0.00  | 1.00E+00 |
|  | <i>HFE</i>     | rs198852  | G | HET      | 1804 | -0.198 | 0.276 | -0.740 | 0.344  | -0.72 | 4.74E-01 |
|  | <i>HFE</i>     | rs198852  | G | GENO_2DF | 1804 | NA     | NA    | NA     | NA     | 0.62  | 7.34E-01 |
|  | <i>HFE</i>     | rs198851  | T | HOM      | 1646 | 0.451  | 0.839 | -1.193 | 2.096  | 0.54  | 5.91E-01 |
|  | <i>HFE</i>     | rs198851  | T | HET      | 1646 | 1.276  | 0.320 | 0.648  | 1.903  | 3.98  | 7.10E-05 |
|  | <i>HFE</i>     | rs198851  | T | GENO_2DF | 1646 | NA     | NA    | NA     | NA     | 15.91 | 3.51E-04 |
|  | <i>HFE</i>     | rs198848  | T | HOM      | 1804 | 0.000  | 0.381 | -0.746 | 0.746  | 0.00  | 1.00E+00 |
|  | <i>HFE</i>     | rs198848  | T | HET      | 1804 | -0.198 | 0.276 | -0.740 | 0.344  | -0.72 | 4.74E-01 |
|  | <i>HFE</i>     | rs198848  | T | GENO_2DF | 1804 | NA     | NA    | NA     | NA     | 0.62  | 7.34E-01 |
|  | <i>TMPRSS6</i> | rs2235320 | T | HOM      | 1803 | -2.472 | 1.034 | -4.499 | -0.445 | -2.39 | 1.70E-02 |
|  | <i>TMPRSS6</i> | rs2235320 | T | HET      | 1803 | -0.955 | 0.302 | -1.547 | -0.364 | -3.16 | 1.59E-03 |
|  | <i>TMPRSS6</i> | rs2235320 | T | GENO_2DF | 1803 | NA     | NA    | NA     | NA     | 14.77 | 6.20E-04 |
|  | <i>TMPRSS6</i> | rs2235321 | A | HOM      | 1560 | 1.421  | 0.446 | 0.547  | 2.295  | 3.19  | 1.47E-03 |
|  | <i>TMPRSS6</i> | rs2235321 | A | HET      | 1560 | 0.405  | 0.285 | -0.154 | 0.964  | 1.42  | 1.56E-01 |
|  | <i>TMPRSS6</i> | rs2235321 | A | GENO_2DF | 1560 | NA     | NA    | NA     | NA     | 10.25 | 5.94E-03 |
|  | <i>TMPRSS6</i> | rs855791  | A | HOM      | 1804 | -2.530 | 0.361 | -3.237 | -1.823 | -7.02 | 3.26E-12 |
|  | <i>TMPRSS6</i> | rs855791  | A | HET      | 1804 | -1.498 | 0.288 | -2.063 | -0.933 | -5.20 | 2.22E-07 |
|  | <i>TMPRSS6</i> | rs855791  | A | GENO_2DF | 1804 | NA     | NA    | NA     | NA     | 52.84 | 3.36E-12 |
|  | <i>TMPRSS6</i> | rs5756504 | T | HOM      | 1603 | 1.173  | 0.454 | 0.283  | 2.062  | 2.58  | 9.86E-03 |
|  | <i>TMPRSS6</i> | rs5756504 | T | HET      | 1603 | 0.559  | 0.281 | 0.008  | 1.109  | 1.99  | 4.68E-02 |
|  | <i>TMPRSS6</i> | rs5756504 | T | GENO_2DF | 1603 | NA     | NA    | NA     | NA     | 8.11  | 1.73E-02 |
|  | <i>TMPRSS6</i> | rs5756505 | C | HOM      | 1647 | 1.517  | 0.426 | 0.684  | 2.351  | 3.57  | 3.73E-04 |
|  | <i>TMPRSS6</i> | rs5756505 | C | HET      | 1647 | 0.528  | 0.284 | -0.028 | 1.084  | 1.86  | 6.27E-02 |
|  | <i>TMPRSS6</i> | rs5756505 | C | GENO_2DF | 1647 | NA     | NA    | NA     | NA     | 13.02 | 1.49E-03 |
|  | <i>TMPRSS6</i> | rs5756506 | C | HOM      | 1635 | 1.312  | 0.445 | 0.439  | 2.185  | 2.95  | 3.26E-03 |
|  | <i>TMPRSS6</i> | rs5756506 | C | HET      | 1635 | 0.527  | 0.281 | -0.024 | 1.077  | 1.88  | 6.09E-02 |
|  | <i>TMPRSS6</i> | rs5756506 | C | GENO_2DF | 1635 | NA     | NA    | NA     | NA     | 9.55  | 8.46E-03 |

|  |                |            |   |          |      |        |       |        |        |       |          |
|--|----------------|------------|---|----------|------|--------|-------|--------|--------|-------|----------|
|  | <i>TMPRSS6</i> | rs4820268  | G | HOM      | 1799 | -2.399 | 0.361 | -3.107 | -1.691 | -6.64 | 4.04E-11 |
|  | <i>TMPRSS6</i> | rs4820268  | G | HET      | 1799 | -1.384 | 0.296 | -1.964 | -0.805 | -4.69 | 3.01E-06 |
|  | <i>TMPRSS6</i> | rs4820268  | G | GENO_2DF | 1799 | NA     | NA    | NA     | NA     | 45.91 | 1.07E-10 |
|  | <i>TMPRSS6</i> | rs13055107 | A | HOM      | 1603 | 4.356  | 1.123 | 2.155  | 6.556  | 3.88  | 1.09E-04 |
|  | <i>TMPRSS6</i> | rs13055107 | A | HET      | 1603 | 0.917  | 0.327 | 0.277  | 1.558  | 2.81  | 5.08E-03 |
|  | <i>TMPRSS6</i> | rs13055107 | A | GENO_2DF | 1603 | NA     | NA    | NA     | NA     | 21.72 | 1.92E-05 |
|  | <i>TMPRSS6</i> | rs2413450  | T | HOM      | 1719 | -2.376 | 0.374 | -3.108 | -1.644 | -6.36 | 2.57E-10 |
|  | <i>TMPRSS6</i> | rs2413450  | T | HET      | 1719 | -1.315 | 0.299 | -1.901 | -0.729 | -4.40 | 1.17E-05 |
|  | <i>TMPRSS6</i> | rs2413450  | T | GENO_2DF | 1719 | NA     | NA    | NA     | NA     | 42.09 | 7.23E-10 |
|  | <i>TMPRSS6</i> | rs855789   | C | HOM      | 1799 | 9.345  | 3.785 | 1.928  | 16.760 | 2.47  | 1.36E-02 |
|  | <i>TMPRSS6</i> | rs855789   | C | HET      | 1799 | 0.190  | 0.432 | -0.656 | 1.036  | 0.44  | 6.60E-01 |
|  | <i>TMPRSS6</i> | rs855789   | C | GENO_2DF | 1799 | NA     | NA    | NA     | NA     | 6.27  | 4.36E-02 |
|  | <i>TMPRSS6</i> | rs855788   | A | HOM      | 1803 | 0.890  | 0.396 | 0.114  | 1.667  | 2.25  | 2.48E-02 |
|  | <i>TMPRSS6</i> | rs855788   | A | HET      | 1803 | 0.453  | 0.274 | -0.084 | 0.990  | 1.65  | 9.84E-02 |
|  | <i>TMPRSS6</i> | rs855788   | A | GENO_2DF | 1803 | NA     | NA    | NA     | NA     | 5.74  | 5.68E-02 |
|  | <i>TMPRSS6</i> | rs17750017 | A | HOM      | 1790 | NA     | NA    | NA     | NA     | NA    | NA       |
|  | <i>TMPRSS6</i> | rs17750017 | A | HET      | 1790 | NA     | NA    | NA     | NA     | NA    | NA       |
|  | <i>TMPRSS6</i> | rs17750017 | A | GENO_2DF | 1790 | NA     | NA    | NA     | NA     | NA    | NA       |
|  | <i>TMPRSS6</i> | rs2743820  | C | HOM      | 1575 | 0.577  | 0.434 | -0.273 | 1.426  | 1.33  | 1.84E-01 |
|  | <i>TMPRSS6</i> | rs2743820  | C | HET      | 1575 | 0.541  | 0.287 | -0.021 | 1.102  | 1.89  | 5.93E-02 |
|  | <i>TMPRSS6</i> | rs2743820  | C | GENO_2DF | 1575 | NA     | NA    | NA     | NA     | 4.05  | 1.32E-01 |
|  | <i>TMPRSS6</i> | rs1005478  | A | HOM      | 1535 | 0.066  | 0.421 | -0.759 | 0.891  | 0.16  | 8.76E-01 |
|  | <i>TMPRSS6</i> | rs1005478  | A | HET      | 1535 | 0.033  | 0.289 | -0.533 | 0.598  | 0.11  | 9.10E-01 |
|  | <i>TMPRSS6</i> | rs1005478  | A | GENO_2DF | 1535 | NA     | NA    | NA     | NA     | 0.03  | 9.86E-01 |
|  | <i>TMPRSS6</i> | rs7286184  | G | HOM      | 1544 | -1.955 | 0.615 | -3.159 | -0.750 | -3.18 | 1.50E-03 |
|  | <i>TMPRSS6</i> | rs7286184  | G | HET      | 1544 | -0.791 | 0.284 | -1.349 | -0.234 | -2.78 | 5.44E-03 |
|  | <i>TMPRSS6</i> | rs7286184  | G | GENO_2DF | 1544 | NA     | NA    | NA     | NA     | 15.38 | 4.58E-04 |
|  | <i>TMPRSS6</i> | rs2246092  | G | HOM      | 1534 | 0.213  | 0.418 | -0.607 | 1.033  | 0.51  | 6.11E-01 |
|  | <i>TMPRSS6</i> | rs2246092  | G | HET      | 1534 | 0.077  | 0.289 | -0.489 | 0.644  | 0.27  | 7.89E-01 |
|  | <i>TMPRSS6</i> | rs2246092  | G | GENO_2DF | 1534 | NA     | NA    | NA     | NA     | 0.27  | 8.75E-01 |
|  | <i>TMPRSS6</i> | rs2543519  | G | HOM      | 1559 | -1.478 | 0.547 | -2.550 | -0.406 | -2.70 | 6.95E-03 |
|  | <i>TMPRSS6</i> | rs2543519  | G | HET      | 1559 | -0.669 | 0.281 | -1.218 | -0.119 | -2.38 | 1.73E-02 |
|  | <i>TMPRSS6</i> | rs2543519  | G | GENO_2DF | 1559 | NA     | NA    | NA     | NA     | 10.83 | 4.45E-03 |

|  |                |           |   |          |      |        |       |        |        |       |          |
|--|----------------|-----------|---|----------|------|--------|-------|--------|--------|-------|----------|
|  | <i>TMPRSS6</i> | rs2111833 | T | HOM      | 1598 | 0.583  | 0.431 | -0.262 | 1.429  | 1.35  | 1.77E-01 |
|  | <i>TMPRSS6</i> | rs2111833 | T | HET      | 1598 | 0.492  | 0.284 | -0.065 | 1.048  | 1.73  | 8.38E-02 |
|  | <i>TMPRSS6</i> | rs2111833 | T | GENO_2DF | 1598 | NA     | NA    | NA     | NA     | 3.62  | 1.64E-01 |
|  | <i>TMPRSS6</i> | rs2179229 | G | HOM      | 1550 | 0.266  | 0.414 | -0.546 | 1.078  | 0.64  | 5.21E-01 |
|  | <i>TMPRSS6</i> | rs2179229 | G | HET      | 1550 | 0.091  | 0.287 | -0.472 | 0.654  | 0.32  | 7.52E-01 |
|  | <i>TMPRSS6</i> | rs2179229 | G | GENO_2DF | 1550 | NA     | NA    | NA     | NA     | 0.42  | 8.11E-01 |
|  | <i>TMPRSS6</i> | rs2235323 | C | HOM      | 1801 | 1.005  | 0.397 | 0.227  | 1.782  | 2.53  | 1.14E-02 |
|  | <i>TMPRSS6</i> | rs2235323 | C | HET      | 1801 | 0.616  | 0.273 | 0.082  | 1.150  | 2.26  | 2.38E-02 |
|  | <i>TMPRSS6</i> | rs2235323 | C | GENO_2DF | 1801 | NA     | NA    | NA     | NA     | 8.36  | 1.53E-02 |
|  | <i>TMPRSS6</i> | rs2235324 | C | HOM      | 1803 | 0.992  | 0.396 | 0.216  | 1.768  | 2.51  | 1.23E-02 |
|  | <i>TMPRSS6</i> | rs2235324 | C | HET      | 1803 | 0.604  | 0.272 | 0.070  | 1.137  | 2.22  | 2.69E-02 |
|  | <i>TMPRSS6</i> | rs2235324 | C | GENO_2DF | 1803 | NA     | NA    | NA     | NA     | 8.11  | 1.73E-02 |
|  | <i>TMPRSS6</i> | rs736852  | C | HOM      | 1790 | 1.106  | 0.384 | 0.355  | 1.858  | 2.89  | 3.96E-03 |
|  | <i>TMPRSS6</i> | rs736852  | C | HET      | 1790 | 0.684  | 0.279 | 0.137  | 1.231  | 2.45  | 1.43E-02 |
|  | <i>TMPRSS6</i> | rs736852  | C | GENO_2DF | 1790 | NA     | NA    | NA     | NA     | 10.14 | 6.28E-03 |
|  | <i>TMPRSS6</i> | rs2019848 | A | HOM      | 1739 | -2.207 | 0.575 | -3.335 | -1.080 | -3.84 | 1.29E-04 |
|  | <i>TMPRSS6</i> | rs2019848 | A | HET      | 1739 | -0.778 | 0.270 | -1.308 | -0.248 | -2.88 | 4.03E-03 |
|  | <i>TMPRSS6</i> | rs2019848 | A | GENO_2DF | 1739 | NA     | NA    | NA     | NA     | 19.80 | 5.03E-05 |
|  | <i>TMPRSS6</i> | rs1421312 | G | HOM      | 1803 | 1.097  | 0.390 | 0.332  | 1.861  | 2.81  | 5.01E-03 |
|  | <i>TMPRSS6</i> | rs1421312 | G | HET      | 1803 | 0.695  | 0.273 | 0.159  | 1.231  | 2.54  | 1.11E-02 |
|  | <i>TMPRSS6</i> | rs1421312 | G | GENO_2DF | 1803 | NA     | NA    | NA     | NA     | 10.33 | 5.71E-03 |
|  | <i>TMPRSS6</i> | rs2543514 | C | HOM      | 1795 | 1.092  | 0.383 | 0.341  | 1.843  | 2.85  | 4.42E-03 |
|  | <i>TMPRSS6</i> | rs2543514 | C | HET      | 1795 | 0.678  | 0.278 | 0.132  | 1.223  | 2.43  | 1.51E-02 |
|  | <i>TMPRSS6</i> | rs2543514 | C | GENO_2DF | 1795 | NA     | NA    | NA     | NA     | 9.94  | 6.96E-03 |
|  | <i>TMPRSS6</i> | rs2543513 | G | HOM      | 1795 | 1.092  | 0.383 | 0.341  | 1.843  | 2.85  | 4.42E-03 |
|  | <i>TMPRSS6</i> | rs2543513 | G | HET      | 1795 | 0.678  | 0.278 | 0.132  | 1.223  | 2.43  | 1.51E-02 |
|  | <i>TMPRSS6</i> | rs2543513 | G | GENO_2DF | 1795 | NA     | NA    | NA     | NA     | 9.94  | 6.96E-03 |
|  | <i>TMPRSS6</i> | rs2413451 | G | HOM      | 1795 | 1.092  | 0.383 | 0.341  | 1.843  | 2.85  | 4.42E-03 |
|  | <i>TMPRSS6</i> | rs2413451 | G | HET      | 1795 | 0.678  | 0.278 | 0.132  | 1.223  | 2.43  | 1.51E-02 |
|  | <i>TMPRSS6</i> | rs2413451 | G | GENO_2DF | 1795 | NA     | NA    | NA     | NA     | 9.94  | 6.96E-03 |
|  | <i>TMPRSS6</i> | rs2251655 | T | HOM      | 1795 | 1.092  | 0.383 | 0.341  | 1.843  | 2.85  | 4.42E-03 |
|  | <i>TMPRSS6</i> | rs2251655 | T | HET      | 1795 | 0.678  | 0.278 | 0.132  | 1.223  | 2.43  | 1.51E-02 |
|  | <i>TMPRSS6</i> | rs2251655 | T | GENO_2DF | 1795 | NA     | NA    | NA     | NA     | 9.94  | 6.96E-03 |



|  |                |           |   |          |          |        |       |        |        |       |          |
|--|----------------|-----------|---|----------|----------|--------|-------|--------|--------|-------|----------|
|  | <i>TMPRSS6</i> | rs2743824 | C | HOM      | 1793     | 1.097  | 0.383 | 0.346  | 1.849  | 2.86  | 4.24E-03 |
|  | <i>TMPRSS6</i> | rs2743824 | C | HET      | 1793     | 0.679  | 0.279 | 0.132  | 1.225  | 2.44  | 1.50E-02 |
|  | <i>TMPRSS6</i> | rs2743824 | C | GENO_2DF | 1793     | NA     | NA    | NA     | NA     | 10.00 | 6.74E-03 |
|  | <i>TMPRSS6</i> | rs2543509 | G | HOM      | 1793     | 1.097  | 0.383 | 0.346  | 1.849  | 2.86  | 4.24E-03 |
|  | <i>TMPRSS6</i> | rs2543509 | G | HET      | 1793     | 0.679  | 0.279 | 0.132  | 1.225  | 2.44  | 1.50E-02 |
|  | <i>TMPRSS6</i> | rs2543509 | G | GENO_2DF | 1793     | NA     | NA    | NA     | NA     | 10.00 | 6.74E-03 |
|  | <i>TMPRSS6</i> | rs2743825 | G | HOM      | 1792     | 1.098  | 0.383 | 0.346  | 1.849  | 2.86  | 4.25E-03 |
|  | <i>TMPRSS6</i> | rs2743825 | G | HET      | 1792     | 0.677  | 0.279 | 0.131  | 1.224  | 2.43  | 1.52E-02 |
|  | <i>TMPRSS6</i> | rs2743825 | G | GENO_2DF | 1792     | NA     | NA    | NA     | NA     | 9.98  | 6.80E-03 |
|  | <i>TMPRSS6</i> | rs2160906 | A | HOM      | 1803     | -2.277 | 0.537 | -3.330 | -1.224 | -4.24 | 2.35E-05 |
|  | <i>TMPRSS6</i> | rs2160906 | A | HET      | 1803     | -0.667 | 0.265 | -1.186 | -0.147 | -2.52 | 1.20E-02 |
|  | <i>TMPRSS6</i> | rs2160906 | A | GENO_2DF | 1803     | NA     | NA    | NA     | NA     | 21.01 | 2.75E-05 |
|  | <i>TMPRSS6</i> | rs732755  | C | HOM      | 1.73E+03 | -2.280 | 0.533 | -3.325 | -1.236 | -4.28 | 1.98E-05 |
|  | <i>TMPRSS6</i> | rs732755  | C | HET      | 1727     | -0.747 | 0.268 | -1.273 | -0.221 | -2.78 | 5.45E-03 |
|  | <i>TMPRSS6</i> | rs732755  | C | GENO_2DF | 1727     | NA     | NA    | NA     | NA     | 22.26 | 1.47E-05 |
|  | <i>TMPRSS6</i> | rs8139988 | C | HOM      | 1780     | -2.226 | 0.540 | -3.284 | -1.169 | -4.13 | 3.86E-05 |
|  | <i>TMPRSS6</i> | rs8139988 | C | HET      | 1780     | -0.664 | 0.267 | -1.188 | -0.140 | -2.49 | 1.30E-02 |
|  | <i>TMPRSS6</i> | rs8139988 | C | GENO_2DF | 1780     | NA     | NA    | NA     | NA     | 20.03 | 4.47E-05 |
|  | <i>TMPRSS6</i> | rs2017764 | A | HOM      | 1.77E+03 | 1.207  | 0.398 | 0.427  | 1.986  | 3.03  | 2.45E-03 |
|  | <i>TMPRSS6</i> | rs2017764 | A | HET      | 1772     | 0.737  | 0.275 | 0.199  | 1.275  | 2.68  | 7.36E-03 |
|  | <i>TMPRSS6</i> | rs2017764 | A | GENO_2DF | 1772     | NA     | NA    | NA     | NA     | 11.90 | 2.61E-03 |
|  | <i>TMPRSS6</i> | rs733655  | C | HOM      | 1774     | -1.852 | 0.504 | -2.840 | -0.864 | -3.68 | 2.45E-04 |
|  | <i>TMPRSS6</i> | rs733655  | C | HET      | 1774     | -0.698 | 0.268 | -1.223 | -0.173 | -2.61 | 9.27E-03 |
|  | <i>TMPRSS6</i> | rs733655  | C | GENO_2DF | 1774     | NA     | NA    | NA     | NA     | 16.99 | 2.05E-04 |
|  | <i>TMPRSS6</i> | rs2281090 | A | HOM      | 1775     | -2.252 | 0.547 | -3.325 | -1.179 | -4.12 | 4.05E-05 |
|  | <i>TMPRSS6</i> | rs2281090 | A | HET      | 1775     | -0.726 | 0.268 | -1.251 | -0.201 | -2.71 | 6.75E-03 |
|  | <i>TMPRSS6</i> | rs2281090 | A | GENO_2DF | 1775     | NA     | NA    | NA     | NA     | 20.85 | 2.97E-05 |
|  | <i>TMPRSS6</i> | rs2281091 | T | HOM      | 1773     | -2.270 | 0.550 | -3.348 | -1.192 | -4.13 | 3.84E-05 |
|  | <i>TMPRSS6</i> | rs2281091 | T | HET      | 1773     | -0.726 | 0.268 | -1.251 | -0.200 | -2.71 | 6.86E-03 |
|  | <i>TMPRSS6</i> | rs2281091 | T | GENO_2DF | 1773     | NA     | NA    | NA     | NA     | 20.93 | 2.85E-05 |
|  | <i>TMPRSS6</i> | rs228906  | A | HOM      | 1804     | 0.245  | 0.398 | -0.536 | 1.025  | 0.61  | 5.39E-01 |
|  | <i>TMPRSS6</i> | rs228906  | A | HET      | 1804     | -0.082 | 0.271 | -0.613 | 0.448  | -0.30 | 7.61E-01 |
|  | <i>TMPRSS6</i> | rs228906  | A | GENO_2DF | 1804     | NA     | NA    | NA     | NA     | 0.69  | 7.07E-01 |

|  |                |            |   |          |      |        |       |        |        |       |          |
|--|----------------|------------|---|----------|------|--------|-------|--------|--------|-------|----------|
|  | <i>TMPRSS6</i> | rs7289616  | A | HOM      | 1750 | 1.177  | 0.405 | 0.384  | 1.971  | 2.91  | 3.69E-03 |
|  | <i>TMPRSS6</i> | rs7289616  | A | HET      | 1750 | 0.762  | 0.276 | 0.220  | 1.303  | 2.76  | 5.89E-03 |
|  | <i>TMPRSS6</i> | rs7289616  | A | GENO_2DF | 1750 | NA     | NA    | NA     | NA     | 11.64 | 2.97E-03 |
|  | <i>TMPRSS6</i> | rs9619658  | T | HOM      | 1444 | 1.006  | 0.493 | 0.040  | 1.973  | 2.04  | 4.15E-02 |
|  | <i>TMPRSS6</i> | rs9619658  | T | HET      | 1444 | 0.791  | 0.299 | 0.204  | 1.378  | 2.64  | 8.32E-03 |
|  | <i>TMPRSS6</i> | rs9619658  | T | GENO_2DF | 1444 | NA     | NA    | NA     | NA     | 8.68  | 1.31E-02 |
|  | <i>TMPRSS6</i> | rs228907   | A | HOM      | 1801 | -0.090 | 0.475 | -1.020 | 0.840  | -0.19 | 8.50E-01 |
|  | <i>TMPRSS6</i> | rs228907   | A | HET      | 1801 | 0.085  | 0.267 | -0.438 | 0.608  | 0.32  | 7.50E-01 |
|  | <i>TMPRSS6</i> | rs228907   | A | GENO_2DF | 1801 | NA     | NA    | NA     | NA     | 0.18  | 9.16E-01 |
|  | <i>TMPRSS6</i> | rs17750152 | T | HOM      | 1067 | 0.851  | 0.755 | -0.628 | 2.331  | 1.13  | 2.60E-01 |
|  | <i>TMPRSS6</i> | rs17750152 | T | HET      | 1067 | 0.923  | 0.344 | 0.248  | 1.598  | 2.68  | 7.45E-03 |
|  | <i>TMPRSS6</i> | rs17750152 | T | GENO_2DF | 1067 | NA     | NA    | NA     | NA     | 7.69  | 2.14E-02 |
|  | <i>TMPRSS6</i> | rs4140590  | A | HOM      | 1570 | 0.588  | 0.396 | -0.188 | 1.363  | 1.49  | 1.38E-01 |
|  | <i>TMPRSS6</i> | rs4140590  | A | HET      | 1570 | 0.467  | 0.310 | -0.141 | 1.074  | 1.51  | 1.32E-01 |
|  | <i>TMPRSS6</i> | rs4140590  | A | GENO_2DF | 1570 | NA     | NA    | NA     | NA     | 3.01  | 2.22E-01 |
|  | <i>TMPRSS6</i> | rs4140589  | A | HOM      | 1603 | 0.560  | 0.392 | -0.209 | 1.329  | 1.43  | 1.54E-01 |
|  | <i>TMPRSS6</i> | rs4140589  | A | HET      | 1603 | 0.477  | 0.306 | -0.122 | 1.075  | 1.56  | 1.19E-01 |
|  | <i>TMPRSS6</i> | rs4140589  | A | GENO_2DF | 1603 | NA     | NA    | NA     | NA     | 3.03  | 2.20E-01 |
|  | <i>TMPRSS6</i> | rs5995380  | T | HOM      | 1681 | -1.300 | 0.725 | -2.721 | 0.122  | -1.79 | 7.33E-02 |
|  | <i>TMPRSS6</i> | rs5995380  | T | HET      | 1681 | -0.241 | 0.293 | -0.815 | 0.332  | -0.83 | 4.09E-01 |
|  | <i>TMPRSS6</i> | rs5995380  | T | GENO_2DF | 1681 | NA     | NA    | NA     | NA     | 3.59  | 1.66E-01 |
|  | <i>TMPRSS6</i> | rs11704654 | T | HOM      | 1723 | -1.521 | 0.689 | -2.872 | -0.170 | -2.21 | 2.74E-02 |
|  | <i>TMPRSS6</i> | rs11704654 | T | HET      | 1723 | -0.194 | 0.285 | -0.753 | 0.366  | -0.68 | 4.98E-01 |
|  | <i>TMPRSS6</i> | rs11704654 | T | GENO_2DF | 1723 | NA     | NA    | NA     | NA     | 5.03  | 8.08E-02 |
|  | <i>TMPRSS6</i> | rs5756515  | G | HOM      | 1684 | 0.666  | 0.386 | -0.089 | 1.422  | 1.73  | 8.41E-02 |
|  | <i>TMPRSS6</i> | rs5756515  | G | HET      | 1684 | 0.526  | 0.298 | -0.058 | 1.110  | 1.76  | 7.79E-02 |
|  | <i>TMPRSS6</i> | rs5756515  | G | GENO_2DF | 1684 | NA     | NA    | NA     | NA     | 4.13  | 1.27E-01 |
|  | <i>TMPRSS6</i> | rs5756516  | T | HOM      | 1684 | 0.666  | 0.386 | -0.089 | 1.422  | 1.73  | 8.41E-02 |
|  | <i>TMPRSS6</i> | rs5756516  | T | HET      | 1684 | 0.526  | 0.298 | -0.058 | 1.110  | 1.76  | 7.79E-02 |
|  | <i>TMPRSS6</i> | rs5756516  | T | GENO_2DF | 1684 | NA     | NA    | NA     | NA     | 4.13  | 1.27E-01 |
|  | <i>TMPRSS6</i> | rs228909   | G | HOM      | 1803 | -0.912 | 0.622 | -2.131 | 0.308  | -1.47 | 1.43E-01 |
|  | <i>TMPRSS6</i> | rs228909   | G | HET      | 1803 | -0.168 | 0.276 | -0.708 | 0.372  | -0.61 | 5.41E-01 |
|  | <i>TMPRSS6</i> | rs228909   | G | GENO_2DF | 1803 | NA     | NA    | NA     | NA     | 2.31  | 3.15E-01 |

|  |                |           |   |          |      |        |       |        |        |       |          |
|--|----------------|-----------|---|----------|------|--------|-------|--------|--------|-------|----------|
|  | <i>TMPRSS6</i> | rs228910  | A | HOM      | 1803 | -0.374 | 0.386 | -1.130 | 0.382  | -0.97 | 3.33E-01 |
|  | <i>TMPRSS6</i> | rs228910  | A | HET      | 1803 | 0.128  | 0.274 | -0.408 | 0.665  | 0.47  | 6.39E-01 |
|  | <i>TMPRSS6</i> | rs228910  | A | GENO_2DF | 1803 | NA     | NA    | NA     | NA     | 1.77  | 4.13E-01 |
|  | <i>TMPRSS6</i> | rs2235329 | C | HOM      | 1687 | 0.595  | 0.386 | -0.163 | 1.352  | 1.54  | 1.24E-01 |
|  | <i>TMPRSS6</i> | rs2235329 | C | HET      | 1687 | 0.531  | 0.295 | -0.046 | 1.109  | 1.80  | 7.16E-02 |
|  | <i>TMPRSS6</i> | rs2235329 | C | GENO_2DF | 1687 | NA     | NA    | NA     | NA     | 3.88  | 1.43E-01 |
|  | <i>TMPRSS6</i> | rs228913  | C | HOM      | 1803 | -0.446 | 0.687 | -1.792 | 0.899  | -0.65 | 5.16E-01 |
|  | <i>TMPRSS6</i> | rs228913  | C | HET      | 1803 | -0.115 | 0.277 | -0.659 | 0.428  | -0.42 | 6.77E-01 |
|  | <i>TMPRSS6</i> | rs228913  | C | GENO_2DF | 1803 | NA     | NA    | NA     | NA     | 0.54  | 7.65E-01 |
|  | <i>TMPRSS6</i> | rs228916  | C | HOM      | 1790 | -0.019 | 1.146 | -2.266 | 2.227  | -0.02 | 9.87E-01 |
|  | <i>TMPRSS6</i> | rs228916  | C | HET      | 1790 | -0.033 | 0.308 | -0.637 | 0.572  | -0.11 | 9.15E-01 |
|  | <i>TMPRSS6</i> | rs228916  | C | GENO_2DF | 1790 | NA     | NA    | NA     | NA     | 0.01  | 9.94E-01 |
|  | <i>TMPRSS6</i> | rs228918  | C | HOM      | 1802 | -0.781 | 0.366 | -1.498 | -0.065 | -2.14 | 3.27E-02 |
|  | <i>TMPRSS6</i> | rs228918  | C | HET      | 1802 | -0.341 | 0.280 | -0.890 | 0.207  | -1.22 | 2.23E-01 |
|  | <i>TMPRSS6</i> | rs228918  | C | GENO_2DF | 1802 | NA     | NA    | NA     | NA     | 4.67  | 9.68E-02 |
|  | <i>TMPRSS6</i> | rs228919  | T | HOM      | 1802 | -0.791 | 0.366 | -1.507 | -0.075 | -2.16 | 3.06E-02 |
|  | <i>TMPRSS6</i> | rs228919  | T | HET      | 1802 | -0.345 | 0.280 | -0.894 | 0.204  | -1.23 | 2.18E-01 |
|  | <i>TMPRSS6</i> | rs228919  | T | GENO_2DF | 1802 | NA     | NA    | NA     | NA     | 4.79  | 9.14E-02 |
|  | <i>TMPRSS6</i> | rs2092169 | T | HOM      | 1127 | 1.003  | 2.152 | -3.215 | 5.221  | 0.47  | 6.41E-01 |
|  | <i>TMPRSS6</i> | rs2092169 | T | HET      | 1127 | 0.014  | 0.439 | -0.845 | 0.874  | 0.03  | 9.74E-01 |
|  | <i>TMPRSS6</i> | rs2092169 | T | GENO_2DF | 1127 | NA     | NA    | NA     | NA     | 0.22  | 8.97E-01 |
|  | <i>TMPRSS6</i> | rs228921  | G | HOM      | 1801 | -0.791 | 0.366 | -1.508 | -0.074 | -2.16 | 3.06E-02 |
|  | <i>TMPRSS6</i> | rs228921  | G | HET      | 1801 | -0.344 | 0.280 | -0.893 | 0.205  | -1.23 | 2.20E-01 |
|  | <i>TMPRSS6</i> | rs228921  | G | GENO_2DF | 1801 | NA     | NA    | NA     | NA     | 4.78  | 9.16E-02 |
|  | <i>TMPRSS6</i> | rs3076475 | T | HOM      | 1065 | 0.623  | 0.767 | -0.880 | 2.126  | 0.81  | 4.17E-01 |
|  | <i>TMPRSS6</i> | rs3076475 | T | HET      | 1065 | 0.812  | 0.342 | 0.142  | 1.481  | 2.37  | 1.78E-02 |
|  | <i>TMPRSS6</i> | rs3076475 | T | GENO_2DF | 1065 | NA     | NA    | NA     | NA     | 5.83  | 5.42E-02 |
|  | <i>TMPRSS6</i> | rs228924  | A | HOM      | 1803 | -0.029 | 1.148 | -2.279 | 2.221  | -0.03 | 9.80E-01 |
|  | <i>TMPRSS6</i> | rs228924  | A | HET      | 1803 | -0.089 | 0.306 | -0.688 | 0.510  | -0.29 | 7.71E-01 |
|  | <i>TMPRSS6</i> | rs228924  | A | GENO_2DF | 1803 | NA     | NA    | NA     | NA     | 0.08  | 9.58E-01 |
|  | <i>TMPRSS6</i> | rs228925  | A | HOM      | 1126 | 0.250  | 0.698 | -1.118 | 1.618  | 0.36  | 7.20E-01 |
|  | <i>TMPRSS6</i> | rs228925  | A | HET      | 1126 | -0.091 | 0.334 | -0.745 | 0.563  | -0.27 | 7.85E-01 |
|  | <i>TMPRSS6</i> | rs228925  | A | GENO_2DF | 1126 | NA     | NA    | NA     | NA     | 0.25  | 8.85E-01 |

|    |                |            |   |          |      |        |       |        |        |       |          |
|----|----------------|------------|---|----------|------|--------|-------|--------|--------|-------|----------|
|    | <i>TMPRSS6</i> | rs5756520  | A | HOM      | 1799 | -0.792 | 0.366 | -1.508 | -0.075 | -2.16 | 3.06E-02 |
|    | <i>TMPRSS6</i> | rs5756520  | A | HET      | 1799 | -0.353 | 0.280 | -0.902 | 0.196  | -1.26 | 2.08E-01 |
|    | <i>TMPRSS6</i> | rs5756520  | A | GENO_2DF | 1799 | NA     | NA    | NA     | NA     | 4.81  | 9.04E-02 |
|    | <i>TMPRSS6</i> | rs11914132 | T | HOM      | 1804 | -0.922 | 0.524 | -1.948 | 0.105  | -1.76 | 7.86E-02 |
|    | <i>TMPRSS6</i> | rs11914132 | T | HET      | 1804 | -0.380 | 0.270 | -0.910 | 0.149  | -1.41 | 1.59E-01 |
|    | <i>TMPRSS6</i> | rs11914132 | T | GENO_2DF | 1804 | NA     | NA    | NA     | NA     | 4.31  | 1.16E-01 |
|    | <i>TMPRSS6</i> | rs738297   | C | HOM      | 1793 | -0.508 | 0.699 | -1.878 | 0.862  | -0.73 | 4.68E-01 |
|    | <i>TMPRSS6</i> | rs738297   | C | HET      | 1793 | -0.145 | 0.281 | -0.695 | 0.406  | -0.52 | 6.06E-01 |
|    | <i>TMPRSS6</i> | rs738297   | C | GENO_2DF | 1793 | NA     | NA    | NA     | NA     | 0.72  | 6.99E-01 |
|    | <i>TMPRSS6</i> | rs11089823 | C | HOM      | 1796 | -0.901 | 0.522 | -1.925 | 0.123  | -1.73 | 8.47E-02 |
|    | <i>TMPRSS6</i> | rs11089823 | C | HET      | 1796 | -0.376 | 0.270 | -0.904 | 0.153  | -1.39 | 1.64E-01 |
|    | <i>TMPRSS6</i> | rs11089823 | C | GENO_2DF | 1796 | NA     | NA    | NA     | NA     | 4.16  | 1.25E-01 |
|    | <i>TMPRSS6</i> | rs11089824 | C | HOM      | 1796 | -0.901 | 0.522 | -1.925 | 0.123  | -1.73 | 8.47E-02 |
|    | <i>TMPRSS6</i> | rs11089824 | C | HET      | 1796 | -0.376 | 0.270 | -0.904 | 0.153  | -1.39 | 1.64E-01 |
|    | <i>TMPRSS6</i> | rs11089824 | C | GENO_2DF | 1796 | NA     | NA    | NA     | NA     | 4.16  | 1.25E-01 |
| TS | <i>HFE</i>     | rs9295687  | C | HOM      | 1745 | 3.841  | 0.687 | 2.495  | 5.188  | 5.59  | 2.62E-08 |
|    | <i>HFE</i>     | rs9295687  | C | HET      | 1745 | 1.152  | 0.513 | 0.146  | 2.157  | 2.24  | 2.50E-02 |
|    | <i>HFE</i>     | rs9295687  | C | GENO_2DF | 1745 | NA     | NA    | NA     | NA     | 31.27 | 1.62E-07 |
|    | <i>HFE</i>     | rs4529296  | G | HOM      | 1745 | 3.841  | 0.687 | 2.495  | 5.188  | 5.59  | 2.62E-08 |
|    | <i>HFE</i>     | rs4529296  | G | HET      | 1745 | 1.152  | 0.513 | 0.146  | 2.157  | 2.24  | 2.50E-02 |
|    | <i>HFE</i>     | rs4529296  | G | GENO_2DF | 1745 | NA     | NA    | NA     | NA     | 31.27 | 1.62E-07 |
|    | <i>HFE</i>     | rs9379825  | A | HOM      | 1745 | 3.841  | 0.687 | 2.495  | 5.188  | 5.59  | 2.62E-08 |
|    | <i>HFE</i>     | rs9379825  | A | HET      | 1745 | 1.152  | 0.513 | 0.146  | 2.157  | 2.24  | 2.50E-02 |
|    | <i>HFE</i>     | rs9379825  | A | GENO_2DF | 1745 | NA     | NA    | NA     | NA     | 31.27 | 1.62E-07 |
|    | <i>HFE</i>     | rs9467672  | T | HOM      | 1745 | 3.841  | 0.687 | 2.495  | 5.188  | 5.59  | 2.62E-08 |
|    | <i>HFE</i>     | rs9467672  | T | HET      | 1745 | 1.152  | 0.513 | 0.146  | 2.157  | 2.24  | 2.50E-02 |
|    | <i>HFE</i>     | rs9467672  | T | GENO_2DF | 1745 | NA     | NA    | NA     | NA     | 31.27 | 1.62E-07 |
|    | <i>HFE</i>     | rs9295688  | A | HOM      | 1744 | 3.794  | 0.688 | 2.446  | 5.142  | 5.52  | 3.95E-08 |
|    | <i>HFE</i>     | rs9295688  | A | HET      | 1744 | 1.153  | 0.513 | 0.147  | 2.158  | 2.25  | 2.48E-02 |
|    | <i>HFE</i>     | rs9295688  | A | GENO_2DF | 1744 | NA     | NA    | NA     | NA     | 30.45 | 2.44E-07 |
|    | <i>HFE</i>     | rs2006736  | T | HOM      | 1744 | 3.794  | 0.688 | 2.446  | 5.142  | 5.52  | 3.95E-08 |
|    | <i>HFE</i>     | rs2006736  | T | HET      | 1744 | 1.153  | 0.513 | 0.147  | 2.158  | 2.25  | 2.48E-02 |
|    | <i>HFE</i>     | rs2006736  | T | GENO_2DF | 1744 | NA     | NA    | NA     | NA     | 30.45 | 2.44E-07 |

|  |            |           |   |          |      |        |       |         |        |       |          |
|--|------------|-----------|---|----------|------|--------|-------|---------|--------|-------|----------|
|  | <i>HFE</i> | rs1800702 | G | HOM      | 1744 | 3.794  | 0.688 | 2.446   | 5.142  | 5.52  | 3.95E-08 |
|  | <i>HFE</i> | rs1800702 | G | HET      | 1744 | 1.153  | 0.513 | 0.147   | 2.158  | 2.25  | 2.48E-02 |
|  | <i>HFE</i> | rs1800702 | G | GENO_2DF | 1744 | NA     | NA    | NA      | NA     | 30.45 | 2.44E-07 |
|  | <i>HFE</i> | rs2794720 | C | HOM      | 1744 | 3.794  | 0.688 | 2.446   | 5.142  | 5.52  | 3.95E-08 |
|  | <i>HFE</i> | rs2794720 | C | HET      | 1744 | 1.153  | 0.513 | 0.147   | 2.158  | 2.25  | 2.48E-02 |
|  | <i>HFE</i> | rs2794720 | C | GENO_2DF | 1744 | NA     | NA    | NA      | NA     | 30.45 | 2.44E-07 |
|  | <i>HFE</i> | rs2794719 | G | HOM      | 1744 | 3.794  | 0.688 | 2.446   | 5.142  | 5.52  | 3.95E-08 |
|  | <i>HFE</i> | rs2794719 | G | HET      | 1744 | 1.153  | 0.513 | 0.147   | 2.158  | 2.25  | 2.48E-02 |
|  | <i>HFE</i> | rs2794719 | G | GENO_2DF | 1744 | NA     | NA    | NA      | NA     | 30.45 | 2.44E-07 |
|  | <i>HFE</i> | rs9366637 | T | HOM      | 1804 | -9.752 | 3.713 | -17.030 | -2.474 | -2.63 | 8.71E-03 |
|  | <i>HFE</i> | rs9366637 | T | HET      | 1804 | -1.010 | 0.753 | -2.487  | 0.466  | -1.34 | 1.80E-01 |
|  | <i>HFE</i> | rs9366637 | T | GENO_2DF | 1804 | NA     | NA    | NA      | NA     | 8.54  | 1.40E-02 |
|  | <i>HFE</i> | rs1799945 | G | HOM      | 1755 | 3.025  | 1.353 | 0.374   | 5.676  | 2.24  | 2.54E-02 |
|  | <i>HFE</i> | rs1799945 | G | HET      | 1755 | 2.215  | 0.550 | 1.137   | 3.293  | 4.03  | 5.88E-05 |
|  | <i>HFE</i> | rs1799945 | G | GENO_2DF | 1755 | NA     | NA    | NA      | NA     | 19.64 | 5.43E-05 |
|  | <i>HFE</i> | rs2071303 | C | HOM      | 1804 | 0.846  | 0.748 | -0.620  | 2.312  | 1.13  | 2.58E-01 |
|  | <i>HFE</i> | rs2071303 | C | HET      | 1804 | 0.866  | 0.494 | -0.102  | 1.835  | 1.75  | 7.97E-02 |
|  | <i>HFE</i> | rs2071303 | C | GENO_2DF | 1804 | NA     | NA    | NA      | NA     | 3.40  | 1.83E-01 |
|  | <i>HFE</i> | rs1800562 | A | HOM      | 1804 | 22.600 | 4.814 | 13.170  | 32.040 | 4.70  | 2.87E-06 |
|  | <i>HFE</i> | rs1800562 | A | HET      | 1804 | 5.364  | 0.704 | 3.984   | 6.745  | 7.62  | 4.17E-14 |
|  | <i>HFE</i> | rs1800562 | A | GENO_2DF | 1804 | NA     | NA    | NA      | NA     | 79.00 | 7.00E-18 |
|  | <i>HFE</i> | rs1800708 | C | HOM      | 1803 | -9.684 | 4.007 | -17.540 | -1.830 | -2.42 | 1.58E-02 |
|  | <i>HFE</i> | rs1800708 | C | HET      | 1803 | -1.444 | 0.739 | -2.893  | 0.005  | -1.95 | 5.10E-02 |
|  | <i>HFE</i> | rs1800708 | C | GENO_2DF | 1803 | NA     | NA    | NA      | NA     | 9.46  | 8.84E-03 |
|  | <i>HFE</i> | rs2858996 | T | HOM      | 1803 | 2.642  | 1.249 | 0.194   | 5.090  | 2.12  | 3.46E-02 |
|  | <i>HFE</i> | rs2858996 | T | HET      | 1803 | 1.389  | 0.493 | 0.423   | 2.355  | 2.82  | 4.87E-03 |
|  | <i>HFE</i> | rs2858996 | T | GENO_2DF | 1803 | NA     | NA    | NA      | NA     | 10.98 | 4.12E-03 |
|  | <i>HFE</i> | rs1572982 | A | HOM      | 1804 | 0.361  | 0.665 | -0.943  | 1.664  | 0.54  | 5.88E-01 |
|  | <i>HFE</i> | rs1572982 | A | HET      | 1804 | 0.271  | 0.539 | -0.786  | 1.328  | 0.50  | 6.16E-01 |
|  | <i>HFE</i> | rs1572982 | A | GENO_2DF | 1804 | NA     | NA    | NA      | NA     | 0.36  | 8.35E-01 |
|  | <i>HFE</i> | rs707889  | A | HOM      | 1804 | 2.642  | 1.249 | 0.194   | 5.090  | 2.12  | 3.45E-02 |
|  | <i>HFE</i> | rs707889  | A | HET      | 1804 | 1.400  | 0.492 | 0.435   | 2.365  | 2.84  | 4.53E-03 |
|  | <i>HFE</i> | rs707889  | A | GENO_2DF | 1804 | NA     | NA    | NA      | NA     | 11.11 | 3.88E-03 |

|  |            |            |   |          |      |        |       |         |        |       |          |
|--|------------|------------|---|----------|------|--------|-------|---------|--------|-------|----------|
|  | <i>HFE</i> | rs1045537  | C | HOM      | 1753 | -2.504 | 1.750 | -5.934  | 0.926  | -1.43 | 1.53E-01 |
|  | <i>HFE</i> | rs1045537  | C | HET      | 1753 | -0.601 | 0.565 | -1.708  | 0.506  | -1.06 | 2.87E-01 |
|  | <i>HFE</i> | rs1045537  | C | GENO_2DF | 1753 | NA     | NA    | NA      | NA     | 2.98  | 2.26E-01 |
|  | <i>HFE</i> | rs12346    | T | HOM      | 1804 | -2.115 | 0.785 | -3.654  | -0.575 | -2.69 | 7.16E-03 |
|  | <i>HFE</i> | rs12346    | T | HET      | 1804 | -1.474 | 0.488 | -2.430  | -0.518 | -3.02 | 2.55E-03 |
|  | <i>HFE</i> | rs12346    | T | GENO_2DF | 1804 | NA     | NA    | NA      | NA     | 12.45 | 1.98E-03 |
|  | <i>HFE</i> | rs17596719 | A | HOM      | 1802 | -1.639 | 2.213 | -5.975  | 2.698  | -0.74 | 4.59E-01 |
|  | <i>HFE</i> | rs17596719 | A | HET      | 1802 | -0.825 | 0.582 | -1.966  | 0.316  | -1.42 | 1.57E-01 |
|  | <i>HFE</i> | rs17596719 | A | GENO_2DF | 1802 | NA     | NA    | NA      | NA     | 2.45  | 2.93E-01 |
|  | <i>HFE</i> | rs6918586  | C | HOM      | 1801 | 1.242  | 0.691 | -0.112  | 2.596  | 1.80  | 7.24E-02 |
|  | <i>HFE</i> | rs6918586  | C | HET      | 1801 | 0.790  | 0.510 | -0.210  | 1.790  | 1.55  | 1.22E-01 |
|  | <i>HFE</i> | rs6918586  | C | GENO_2DF | 1801 | NA     | NA    | NA      | NA     | 3.99  | 1.36E-01 |
|  | <i>HFE</i> | rs9393685  | C | HOM      | 1797 | -9.684 | 4.003 | -17.530 | -1.838 | -2.42 | 1.57E-02 |
|  | <i>HFE</i> | rs9393685  | C | HET      | 1797 | -1.331 | 0.721 | -2.745  | 0.082  | -1.85 | 6.51E-02 |
|  | <i>HFE</i> | rs9393685  | C | GENO_2DF | 1797 | NA     | NA    | NA      | NA     | 9.07  | 1.07E-02 |
|  | <i>HFE</i> | rs1150659  | A | HOM      | 1802 | 2.315  | 1.240 | -0.116  | 4.746  | 1.87  | 6.22E-02 |
|  | <i>HFE</i> | rs1150659  | A | HET      | 1802 | 1.435  | 0.494 | 0.468   | 2.403  | 2.91  | 3.67E-03 |
|  | <i>HFE</i> | rs1150659  | A | GENO_2DF | 1802 | NA     | NA    | NA      | NA     | 10.64 | 4.89E-03 |
|  | <i>HFE</i> | rs1150660  | A | HOM      | 1804 | -2.115 | 0.785 | -3.654  | -0.575 | -2.69 | 7.16E-03 |
|  | <i>HFE</i> | rs1150660  | A | HET      | 1804 | -1.474 | 0.488 | -2.430  | -0.518 | -3.02 | 2.55E-03 |
|  | <i>HFE</i> | rs1150660  | A | GENO_2DF | 1804 | NA     | NA    | NA      | NA     | 12.45 | 1.98E-03 |
|  | <i>HFE</i> | rs198857   | G | HOM      | 1802 | 0.410  | 0.665 | -0.894  | 1.713  | 0.62  | 5.38E-01 |
|  | <i>HFE</i> | rs198857   | G | HET      | 1802 | 0.348  | 0.540 | -0.709  | 1.406  | 0.65  | 5.19E-01 |
|  | <i>HFE</i> | rs198857   | G | GENO_2DF | 1802 | NA     | NA    | NA      | NA     | 0.53  | 7.69E-01 |
|  | <i>HFE</i> | rs198856   | G | HOM      | 1802 | 0.410  | 0.665 | -0.894  | 1.713  | 0.62  | 5.38E-01 |
|  | <i>HFE</i> | rs198856   | G | HET      | 1802 | 0.348  | 0.540 | -0.709  | 1.406  | 0.65  | 5.19E-01 |
|  | <i>HFE</i> | rs198856   | G | GENO_2DF | 1802 | NA     | NA    | NA      | NA     | 0.53  | 7.69E-01 |
|  | <i>HFE</i> | rs1543680  | A | HOM      | 1798 | 2.368  | 1.249 | -0.081  | 4.817  | 1.90  | 5.82E-02 |
|  | <i>HFE</i> | rs1543680  | A | HET      | 1798 | 1.437  | 0.495 | 0.466   | 2.407  | 2.90  | 3.76E-03 |
|  | <i>HFE</i> | rs1543680  | A | GENO_2DF | 1798 | NA     | NA    | NA      | NA     | 10.70 | 4.74E-03 |
|  | <i>HFE</i> | rs198855   | A | HOM      | 1755 | 1.059  | 0.909 | -0.722  | 2.840  | 1.17  | 2.44E-01 |
|  | <i>HFE</i> | rs198855   | A | HET      | 1755 | 1.496  | 0.494 | 0.528   | 2.464  | 3.03  | 2.48E-03 |
|  | <i>HFE</i> | rs198855   | A | GENO_2DF | 1755 | NA     | NA    | NA      | NA     | 9.45  | 8.87E-03 |

|  |                |           |   |          |      |        |       |         |        |       |          |
|--|----------------|-----------|---|----------|------|--------|-------|---------|--------|-------|----------|
|  | <i>HFE</i>     | rs7743957 | C | HOM      | 1797 | -9.684 | 4.003 | -17.530 | -1.838 | -2.42 | 1.57E-02 |
|  | <i>HFE</i>     | rs7743957 | C | HET      | 1797 | -1.331 | 0.721 | -2.745  | 0.082  | -1.85 | 6.51E-02 |
|  | <i>HFE</i>     | rs7743957 | C | GENO_2DF | 1797 | NA     | NA    | NA      | NA     | 9.07  | 1.07E-02 |
|  | <i>HFE</i>     | rs198854  | T | HOM      | 1803 | 0.394  | 0.665 | -0.909  | 1.696  | 0.59  | 5.53E-01 |
|  | <i>HFE</i>     | rs198854  | T | HET      | 1803 | 0.348  | 0.540 | -0.709  | 1.406  | 0.65  | 5.19E-01 |
|  | <i>HFE</i>     | rs198854  | T | GENO_2DF | 1803 | NA     | NA    | NA      | NA     | 0.51  | 7.75E-01 |
|  | <i>HFE</i>     | rs198853  | C | HOM      | 1804 | -2.115 | 0.785 | -3.654  | -0.575 | -2.69 | 7.16E-03 |
|  | <i>HFE</i>     | rs198853  | C | HET      | 1804 | -1.474 | 0.488 | -2.430  | -0.518 | -3.02 | 2.55E-03 |
|  | <i>HFE</i>     | rs198853  | C | GENO_2DF | 1804 | NA     | NA    | NA      | NA     | 12.45 | 1.98E-03 |
|  | <i>HFE</i>     | rs2229768 | C | HOM      | 1803 | 2.319  | 1.240 | -0.111  | 4.750  | 1.87  | 6.16E-02 |
|  | <i>HFE</i>     | rs2229768 | C | HET      | 1803 | 1.440  | 0.493 | 0.473   | 2.407  | 2.92  | 3.55E-03 |
|  | <i>HFE</i>     | rs2229768 | C | GENO_2DF | 1803 | NA     | NA    | NA      | NA     | 10.71 | 4.72E-03 |
|  | <i>HFE</i>     | rs198852  | G | HOM      | 1804 | 0.572  | 0.700 | -0.800  | 1.943  | 0.82  | 4.14E-01 |
|  | <i>HFE</i>     | rs198852  | G | HET      | 1804 | -0.299 | 0.508 | -1.294  | 0.697  | -0.59 | 5.57E-01 |
|  | <i>HFE</i>     | rs198852  | G | GENO_2DF | 1804 | NA     | NA    | NA      | NA     | 1.70  | 4.28E-01 |
|  | <i>HFE</i>     | rs198851  | T | HOM      | 1646 | 1.986  | 1.548 | -1.047  | 5.020  | 1.28  | 2.00E-01 |
|  | <i>HFE</i>     | rs198851  | T | HET      | 1646 | 2.658  | 0.591 | 1.500   | 3.816  | 4.50  | 7.28E-06 |
|  | <i>HFE</i>     | rs198851  | T | GENO_2DF | 1646 | NA     | NA    | NA      | NA     | 21.08 | 2.65E-05 |
|  | <i>HFE</i>     | rs198848  | T | HOM      | 1804 | 0.572  | 0.700 | -0.800  | 1.943  | 0.82  | 4.14E-01 |
|  | <i>HFE</i>     | rs198848  | T | HET      | 1804 | -0.299 | 0.508 | -1.294  | 0.697  | -0.59 | 5.57E-01 |
|  | <i>HFE</i>     | rs198848  | T | GENO_2DF | 1804 | NA     | NA    | NA      | NA     | 1.70  | 4.28E-01 |
|  | <i>TMPRSS6</i> | rs2235320 | T | HOM      | 1803 | -4.904 | 1.898 | -8.624  | -1.183 | -2.58 | 9.87E-03 |
|  | <i>TMPRSS6</i> | rs2235320 | T | HET      | 1803 | -2.110 | 0.554 | -3.197  | -1.024 | -3.81 | 1.46E-04 |
|  | <i>TMPRSS6</i> | rs2235320 | T | GENO_2DF | 1803 | NA     | NA    | NA      | NA     | 19.93 | 4.69E-05 |
|  | <i>TMPRSS6</i> | rs2235321 | A | HOM      | 1560 | 3.067  | 0.820 | 1.459   | 4.675  | 3.74  | 1.92E-04 |
|  | <i>TMPRSS6</i> | rs2235321 | A | HET      | 1560 | 1.145  | 0.525 | 0.117   | 2.174  | 2.18  | 2.92E-02 |
|  | <i>TMPRSS6</i> | rs2235321 | A | GENO_2DF | 1560 | NA     | NA    | NA      | NA     | 14.84 | 5.99E-04 |
|  | <i>TMPRSS6</i> | rs855791  | A | HOM      | 1804 | -4.958 | 0.662 | -6.255  | -3.662 | -7.50 | 1.03E-13 |
|  | <i>TMPRSS6</i> | rs855791  | A | HET      | 1804 | -2.922 | 0.528 | -3.957  | -1.886 | -5.53 | 3.69E-08 |
|  | <i>TMPRSS6</i> | rs855791  | A | GENO_2DF | 1804 | NA     | NA    | NA      | NA     | 60.20 | 8.47E-14 |
|  | <i>TMPRSS6</i> | rs5756504 | T | HOM      | 1603 | 2.415  | 0.829 | 0.790   | 4.040  | 2.91  | 3.63E-03 |
|  | <i>TMPRSS6</i> | rs5756504 | T | HET      | 1603 | 1.437  | 0.513 | 0.432   | 2.442  | 2.80  | 5.15E-03 |
|  | <i>TMPRSS6</i> | rs5756504 | T | GENO_2DF | 1603 | NA     | NA    | NA      | NA     | 12.26 | 2.18E-03 |

|  |                |            |   |          |      |        |       |        |        |       |          |
|--|----------------|------------|---|----------|------|--------|-------|--------|--------|-------|----------|
|  | <i>TMPRSS6</i> | rs5756505  | C | HOM      | 1647 | 3.046  | 0.780 | 1.518  | 4.574  | 3.91  | 9.73E-05 |
|  | <i>TMPRSS6</i> | rs5756505  | C | HET      | 1647 | 1.547  | 0.520 | 0.529  | 2.565  | 2.98  | 2.95E-03 |
|  | <i>TMPRSS6</i> | rs5756505  | C | GENO_2DF | 1647 | NA     | NA    | NA     | NA     | 17.86 | 1.32E-04 |
|  | <i>TMPRSS6</i> | rs5756506  | C | HOM      | 1635 | 2.798  | 0.816 | 1.198  | 4.398  | 3.43  | 6.25E-04 |
|  | <i>TMPRSS6</i> | rs5756506  | C | HET      | 1635 | 1.408  | 0.515 | 0.399  | 2.417  | 2.73  | 6.32E-03 |
|  | <i>TMPRSS6</i> | rs5756506  | C | GENO_2DF | 1635 | NA     | NA    | NA     | NA     | 14.53 | 7.00E-04 |
|  | <i>TMPRSS6</i> | rs4820268  | G | HOM      | 1799 | -4.721 | 0.662 | -6.019 | -3.423 | -7.13 | 1.44E-12 |
|  | <i>TMPRSS6</i> | rs4820268  | G | HET      | 1799 | -2.681 | 0.542 | -3.743 | -1.619 | -4.95 | 8.22E-07 |
|  | <i>TMPRSS6</i> | rs4820268  | G | GENO_2DF | 1799 | NA     | NA    | NA     | NA     | 52.62 | 3.75E-12 |
|  | <i>TMPRSS6</i> | rs13055107 | A | HOM      | 1603 | 9.622  | 2.068 | 5.569  | 13.670 | 4.65  | 3.54E-06 |
|  | <i>TMPRSS6</i> | rs13055107 | A | HET      | 1603 | 1.219  | 0.602 | 0.040  | 2.399  | 2.03  | 4.29E-02 |
|  | <i>TMPRSS6</i> | rs13055107 | A | GENO_2DF | 1603 | NA     | NA    | NA     | NA     | 24.74 | 4.25E-06 |
|  | <i>TMPRSS6</i> | rs2413450  | T | HOM      | 1719 | -4.701 | 0.687 | -6.047 | -3.355 | -6.85 | 1.05E-11 |
|  | <i>TMPRSS6</i> | rs2413450  | T | HET      | 1719 | -2.548 | 0.550 | -3.625 | -1.470 | -4.63 | 3.86E-06 |
|  | <i>TMPRSS6</i> | rs2413450  | T | GENO_2DF | 1719 | NA     | NA    | NA     | NA     | 48.47 | 2.99E-11 |
|  | <i>TMPRSS6</i> | rs855789   | C | HOM      | 1799 | 11.890 | 6.961 | -1.756 | 25.530 | 1.71  | 8.79E-02 |
|  | <i>TMPRSS6</i> | rs855789   | C | HET      | 1799 | 0.194  | 0.794 | -1.362 | 1.750  | 0.24  | 8.07E-01 |
|  | <i>TMPRSS6</i> | rs855789   | C | GENO_2DF | 1799 | NA     | NA    | NA     | NA     | 2.97  | 2.27E-01 |
|  | <i>TMPRSS6</i> | rs855788   | A | HOM      | 1803 | 2.424  | 0.727 | 0.999  | 3.848  | 3.34  | 8.70E-04 |
|  | <i>TMPRSS6</i> | rs855788   | A | HET      | 1803 | 1.321  | 0.502 | 0.336  | 2.305  | 2.63  | 8.63E-03 |
|  | <i>TMPRSS6</i> | rs855788   | A | GENO_2DF | 1803 | NA     | NA    | NA     | NA     | 13.14 | 1.40E-03 |
|  | <i>TMPRSS6</i> | rs17750017 | A | HOM      | 1790 | NA     | NA    | NA     | NA     | NA    | NA       |
|  | <i>TMPRSS6</i> | rs17750017 | A | HET      | 1790 | NA     | NA    | NA     | NA     | NA    | NA       |
|  | <i>TMPRSS6</i> | rs17750017 | A | GENO_2DF | 1790 | NA     | NA    | NA     | NA     | NA    | NA       |
|  | <i>TMPRSS6</i> | rs2743820  | C | HOM      | 1575 | 1.969  | 0.802 | 0.397  | 3.542  | 2.46  | 1.42E-02 |
|  | <i>TMPRSS6</i> | rs2743820  | C | HET      | 1575 | 1.418  | 0.530 | 0.379  | 2.457  | 2.68  | 7.56E-03 |
|  | <i>TMPRSS6</i> | rs2743820  | C | GENO_2DF | 1575 | NA     | NA    | NA     | NA     | 9.72  | 7.74E-03 |
|  | <i>TMPRSS6</i> | rs1005478  | A | HOM      | 1535 | -0.430 | 0.779 | -1.956 | 1.096  | -0.55 | 5.81E-01 |
|  | <i>TMPRSS6</i> | rs1005478  | A | HET      | 1535 | 0.114  | 0.534 | -0.932 | 1.160  | 0.21  | 8.31E-01 |
|  | <i>TMPRSS6</i> | rs1005478  | A | GENO_2DF | 1535 | NA     | NA    | NA     | NA     | 0.50  | 7.80E-01 |
|  | <i>TMPRSS6</i> | rs7286184  | G | HOM      | 1544 | -3.569 | 1.139 | -5.802 | -1.336 | -3.13 | 1.76E-03 |
|  | <i>TMPRSS6</i> | rs7286184  | G | HET      | 1544 | -1.802 | 0.527 | -2.835 | -0.769 | -3.42 | 6.46E-04 |
|  | <i>TMPRSS6</i> | rs7286184  | G | GENO_2DF | 1544 | NA     | NA    | NA     | NA     | 18.49 | 9.65E-05 |



|  |                |           |   |          |      |        |       |        |        |       |          |
|--|----------------|-----------|---|----------|------|--------|-------|--------|--------|-------|----------|
|  | <i>TMPRSS6</i> | rs2246092 | G | HOM      | 1534 | -0.249 | 0.774 | -1.766 | 1.269  | -0.32 | 7.48E-01 |
|  | <i>TMPRSS6</i> | rs2246092 | G | HET      | 1534 | 0.152  | 0.535 | -0.896 | 1.200  | 0.28  | 7.76E-01 |
|  | <i>TMPRSS6</i> | rs2246092 | G | GENO_2DF | 1534 | NA     | NA    | NA     | NA     | 0.29  | 8.66E-01 |
|  | <i>TMPRSS6</i> | rs2543519 | G | HOM      | 1559 | -2.756 | 1.013 | -4.742 | -0.770 | -2.72 | 6.60E-03 |
|  | <i>TMPRSS6</i> | rs2543519 | G | HET      | 1559 | -1.491 | 0.520 | -2.510 | -0.472 | -2.87 | 4.18E-03 |
|  | <i>TMPRSS6</i> | rs2543519 | G | GENO_2DF | 1559 | NA     | NA    | NA     | NA     | 13.01 | 1.50E-03 |
|  | <i>TMPRSS6</i> | rs2111833 | T | HOM      | 1598 | 2.014  | 0.798 | 0.450  | 3.577  | 2.53  | 1.17E-02 |
|  | <i>TMPRSS6</i> | rs2111833 | T | HET      | 1598 | 1.329  | 0.525 | 0.299  | 2.358  | 2.53  | 1.15E-02 |
|  | <i>TMPRSS6</i> | rs2111833 | T | GENO_2DF | 1598 | NA     | NA    | NA     | NA     | 9.44  | 8.94E-03 |
|  | <i>TMPRSS6</i> | rs2179229 | G | HOM      | 1550 | -0.098 | 0.767 | -1.602 | 1.405  | -0.13 | 8.98E-01 |
|  | <i>TMPRSS6</i> | rs2179229 | G | HET      | 1550 | 0.174  | 0.532 | -0.869 | 1.216  | 0.33  | 7.44E-01 |
|  | <i>TMPRSS6</i> | rs2179229 | G | GENO_2DF | 1550 | NA     | NA    | NA     | NA     | 0.18  | 9.15E-01 |
|  | <i>TMPRSS6</i> | rs2235323 | C | HOM      | 1801 | 2.241  | 0.728 | 0.814  | 3.668  | 3.08  | 2.12E-03 |
|  | <i>TMPRSS6</i> | rs2235323 | C | HET      | 1801 | 1.461  | 0.500 | 0.480  | 2.441  | 2.92  | 3.55E-03 |
|  | <i>TMPRSS6</i> | rs2235323 | C | GENO_2DF | 1801 | NA     | NA    | NA     | NA     | 13.01 | 1.50E-03 |
|  | <i>TMPRSS6</i> | rs2235324 | C | HOM      | 1803 | 2.239  | 0.727 | 0.815  | 3.664  | 3.08  | 2.10E-03 |
|  | <i>TMPRSS6</i> | rs2235324 | C | HET      | 1803 | 1.445  | 0.500 | 0.465  | 2.425  | 2.89  | 3.91E-03 |
|  | <i>TMPRSS6</i> | rs2235324 | C | GENO_2DF | 1803 | NA     | NA    | NA     | NA     | 12.89 | 1.59E-03 |
|  | <i>TMPRSS6</i> | rs736852  | C | HOM      | 1790 | 2.376  | 0.704 | 0.996  | 3.756  | 3.38  | 7.54E-04 |
|  | <i>TMPRSS6</i> | rs736852  | C | HET      | 1790 | 1.671  | 0.512 | 0.667  | 2.675  | 3.26  | 1.13E-03 |
|  | <i>TMPRSS6</i> | rs736852  | C | GENO_2DF | 1790 | NA     | NA    | NA     | NA     | 15.45 | 4.43E-04 |
|  | <i>TMPRSS6</i> | rs2019848 | A | HOM      | 1739 | -4.052 | 1.061 | -6.133 | -1.972 | -3.82 | 1.40E-04 |
|  | <i>TMPRSS6</i> | rs2019848 | A | HET      | 1739 | -1.665 | 0.499 | -2.642 | -0.688 | -3.34 | 8.54E-04 |
|  | <i>TMPRSS6</i> | rs2019848 | A | GENO_2DF | 1739 | NA     | NA    | NA     | NA     | 22.00 | 1.67E-05 |
|  | <i>TMPRSS6</i> | rs1421312 | G | HOM      | 1803 | 2.393  | 0.716 | 0.989  | 3.797  | 3.34  | 8.55E-04 |
|  | <i>TMPRSS6</i> | rs1421312 | G | HET      | 1803 | 1.514  | 0.502 | 0.531  | 2.498  | 3.02  | 2.59E-03 |
|  | <i>TMPRSS6</i> | rs1421312 | G | GENO_2DF | 1803 | NA     | NA    | NA     | NA     | 14.58 | 6.83E-04 |
|  | <i>TMPRSS6</i> | rs2543514 | C | HOM      | 1795 | 2.353  | 0.703 | 0.975  | 3.731  | 3.35  | 8.36E-04 |
|  | <i>TMPRSS6</i> | rs2543514 | C | HET      | 1795 | 1.658  | 0.511 | 0.656  | 2.659  | 3.24  | 1.20E-03 |
|  | <i>TMPRSS6</i> | rs2543514 | C | GENO_2DF | 1795 | NA     | NA    | NA     | NA     | 15.23 | 4.92E-04 |
|  | <i>TMPRSS6</i> | rs2543513 | G | HOM      | 1795 | 2.353  | 0.703 | 0.975  | 3.731  | 3.35  | 8.36E-04 |
|  | <i>TMPRSS6</i> | rs2543513 | G | HET      | 1795 | 1.658  | 0.511 | 0.656  | 2.659  | 3.24  | 1.20E-03 |
|  | <i>TMPRSS6</i> | rs2543513 | G | GENO_2DF | 1795 | NA     | NA    | NA     | NA     | 15.23 | 4.92E-04 |

|  |                |           |   |          |      |        |       |        |        |       |          |
|--|----------------|-----------|---|----------|------|--------|-------|--------|--------|-------|----------|
|  | <i>TMPRSS6</i> | rs2413451 | G | HOM      | 1795 | 2.353  | 0.703 | 0.975  | 3.731  | 3.35  | 8.36E-04 |
|  | <i>TMPRSS6</i> | rs2413451 | G | HET      | 1795 | 1.658  | 0.511 | 0.656  | 2.659  | 3.24  | 1.20E-03 |
|  | <i>TMPRSS6</i> | rs2413451 | G | GENO_2DF | 1795 | NA     | NA    | NA     | NA     | 15.23 | 4.92E-04 |
|  | <i>TMPRSS6</i> | rs2251655 | T | HOM      | 1795 | 2.353  | 0.703 | 0.975  | 3.731  | 3.35  | 8.36E-04 |
|  | <i>TMPRSS6</i> | rs2251655 | T | HET      | 1795 | 1.658  | 0.511 | 0.656  | 2.659  | 3.24  | 1.20E-03 |
|  | <i>TMPRSS6</i> | rs2251655 | T | GENO_2DF | 1795 | NA     | NA    | NA     | NA     | 15.23 | 4.92E-04 |
|  | <i>TMPRSS6</i> | rs2743824 | C | HOM      | 1793 | 2.358  | 0.704 | 0.979  | 3.737  | 3.35  | 8.21E-04 |
|  | <i>TMPRSS6</i> | rs2743824 | C | HET      | 1793 | 1.658  | 0.512 | 0.655  | 2.661  | 3.24  | 1.21E-03 |
|  | <i>TMPRSS6</i> | rs2743824 | C | GENO_2DF | 1793 | NA     | NA    | NA     | NA     | 15.24 | 4.90E-04 |
|  | <i>TMPRSS6</i> | rs2543509 | G | HOM      | 1793 | 2.358  | 0.704 | 0.979  | 3.737  | 3.35  | 8.21E-04 |
|  | <i>TMPRSS6</i> | rs2543509 | G | HET      | 1793 | 1.658  | 0.512 | 0.655  | 2.661  | 3.24  | 1.21E-03 |
|  | <i>TMPRSS6</i> | rs2543509 | G | GENO_2DF | 1793 | NA     | NA    | NA     | NA     | 15.24 | 4.90E-04 |
|  | <i>TMPRSS6</i> | rs2743825 | G | HOM      | 1792 | 2.358  | 0.704 | 0.979  | 3.738  | 3.35  | 8.23E-04 |
|  | <i>TMPRSS6</i> | rs2743825 | G | HET      | 1792 | 1.656  | 0.512 | 0.653  | 2.659  | 3.24  | 1.24E-03 |
|  | <i>TMPRSS6</i> | rs2743825 | G | GENO_2DF | 1792 | NA     | NA    | NA     | NA     | 15.22 | 4.96E-04 |
|  | <i>TMPRSS6</i> | rs2160906 | A | HOM      | 1803 | -4.146 | 0.986 | -6.080 | -2.213 | -4.20 | 2.76E-05 |
|  | <i>TMPRSS6</i> | rs2160906 | A | HET      | 1803 | -1.532 | 0.487 | -2.486 | -0.579 | -3.15 | 1.67E-03 |
|  | <i>TMPRSS6</i> | rs2160906 | A | GENO_2DF | 1803 | NA     | NA    | NA     | NA     | 23.39 | 8.33E-06 |
|  | <i>TMPRSS6</i> | rs732755  | C | HOM      | 1727 | -4.171 | 0.986 | -6.103 | -2.239 | -4.23 | 2.44E-05 |
|  | <i>TMPRSS6</i> | rs732755  | C | HET      | 1727 | -1.656 | 0.497 | -2.629 | -0.683 | -3.34 | 8.71E-04 |
|  | <i>TMPRSS6</i> | rs732755  | C | GENO_2DF | 1727 | NA     | NA    | NA     | NA     | 24.46 | 4.88E-06 |
|  | <i>TMPRSS6</i> | rs8139988 | C | HOM      | 1780 | -4.127 | 0.992 | -6.072 | -2.182 | -4.16 | 3.35E-05 |
|  | <i>TMPRSS6</i> | rs8139988 | C | HET      | 1780 | -1.511 | 0.491 | -2.474 | -0.548 | -3.08 | 2.14E-03 |
|  | <i>TMPRSS6</i> | rs8139988 | C | GENO_2DF | 1780 | NA     | NA    | NA     | NA     | 22.71 | 1.17E-05 |
|  | <i>TMPRSS6</i> | rs2017764 | A | HOM      | 1772 | 2.581  | 0.731 | 1.148  | 4.015  | 3.53  | 4.27E-04 |
|  | <i>TMPRSS6</i> | rs2017764 | A | HET      | 1772 | 1.558  | 0.505 | 0.568  | 2.549  | 3.09  | 2.07E-03 |
|  | <i>TMPRSS6</i> | rs2017764 | A | GENO_2DF | 1772 | NA     | NA    | NA     | NA     | 15.95 | 3.44E-04 |
|  | <i>TMPRSS6</i> | rs733655  | C | HOM      | 1774 | -3.407 | 0.927 | -5.224 | -1.591 | -3.68 | 2.44E-04 |
|  | <i>TMPRSS6</i> | rs733655  | C | HET      | 1774 | -1.494 | 0.493 | -2.460 | -0.528 | -3.03 | 2.47E-03 |
|  | <i>TMPRSS6</i> | rs733655  | C | GENO_2DF | 1774 | NA     | NA    | NA     | NA     | 18.81 | 8.22E-05 |
|  | <i>TMPRSS6</i> | rs2281090 | A | HOM      | 1775 | -4.141 | 1.007 | -6.114 | -2.168 | -4.11 | 4.07E-05 |
|  | <i>TMPRSS6</i> | rs2281090 | A | HET      | 1775 | -1.595 | 0.493 | -2.561 | -0.630 | -3.24 | 1.23E-03 |
|  | <i>TMPRSS6</i> | rs2281090 | A | GENO_2DF | 1775 | NA     | NA    | NA     | NA     | 23.25 | 8.95E-06 |

|  |                |            |   |          |      |        |       |        |        |       |          |
|--|----------------|------------|---|----------|------|--------|-------|--------|--------|-------|----------|
|  | <i>TMPRSS6</i> | rs2281091  | T | HOM      | 1773 | -4.111 | 1.012 | -6.094 | -2.129 | -4.06 | 5.03E-05 |
|  | <i>TMPRSS6</i> | rs2281091  | T | HET      | 1773 | -1.594 | 0.493 | -2.560 | -0.627 | -3.23 | 1.25E-03 |
|  | <i>TMPRSS6</i> | rs2281091  | T | GENO_2DF | 1773 | NA     | NA    | NA     | NA     | 22.87 | 1.08E-05 |
|  | <i>TMPRSS6</i> | rs228906   | A | HOM      | 1804 | 0.103  | 0.732 | -1.332 | 1.538  | 0.14  | 8.88E-01 |
|  | <i>TMPRSS6</i> | rs228906   | A | HET      | 1804 | -0.053 | 0.497 | -1.027 | 0.922  | -0.11 | 9.16E-01 |
|  | <i>TMPRSS6</i> | rs228906   | A | GENO_2DF | 1804 | NA     | NA    | NA     | NA     | 0.05  | 9.76E-01 |
|  | <i>TMPRSS6</i> | rs7289616  | A | HOM      | 1750 | 2.455  | 0.745 | 0.995  | 3.915  | 3.30  | 1.00E-03 |
|  | <i>TMPRSS6</i> | rs7289616  | A | HET      | 1750 | 1.576  | 0.508 | 0.580  | 2.572  | 3.10  | 1.95E-03 |
|  | <i>TMPRSS6</i> | rs7289616  | A | GENO_2DF | 1750 | NA     | NA    | NA     | NA     | 14.85 | 5.95E-04 |
|  | <i>TMPRSS6</i> | rs9619658  | T | HOM      | 1444 | 1.698  | 0.903 | -0.072 | 3.468  | 1.88  | 6.03E-02 |
|  | <i>TMPRSS6</i> | rs9619658  | T | HET      | 1444 | 1.624  | 0.548 | 0.549  | 2.699  | 2.96  | 3.12E-03 |
|  | <i>TMPRSS6</i> | rs9619658  | T | GENO_2DF | 1444 | NA     | NA    | NA     | NA     | 9.83  | 7.32E-03 |
|  | <i>TMPRSS6</i> | rs228907   | A | HOM      | 1801 | -0.074 | 0.872 | -1.783 | 1.636  | -0.08 | 9.33E-01 |
|  | <i>TMPRSS6</i> | rs228907   | A | HET      | 1801 | 0.206  | 0.491 | -0.755 | 1.168  | 0.42  | 6.74E-01 |
|  | <i>TMPRSS6</i> | rs228907   | A | GENO_2DF | 1801 | NA     | NA    | NA     | NA     | 0.21  | 8.99E-01 |
|  | <i>TMPRSS6</i> | rs17750152 | T | HOM      | 1067 | 2.133  | 1.381 | -0.574 | 4.840  | 1.55  | 1.23E-01 |
|  | <i>TMPRSS6</i> | rs17750152 | T | HET      | 1067 | 1.794  | 0.630 | 0.560  | 3.029  | 2.85  | 4.49E-03 |
|  | <i>TMPRSS6</i> | rs17750152 | T | GENO_2DF | 1067 | NA     | NA    | NA     | NA     | 9.33  | 9.43E-03 |
|  | <i>TMPRSS6</i> | rs4140590  | A | HOM      | 1570 | 1.269  | 0.724 | -0.151 | 2.688  | 1.75  | 8.00E-02 |
|  | <i>TMPRSS6</i> | rs4140590  | A | HET      | 1570 | 1.230  | 0.567 | 0.118  | 2.341  | 2.17  | 3.03E-02 |
|  | <i>TMPRSS6</i> | rs4140590  | A | GENO_2DF | 1570 | NA     | NA    | NA     | NA     | 5.35  | 6.91E-02 |
|  | <i>TMPRSS6</i> | rs4140589  | A | HOM      | 1603 | 1.238  | 0.717 | -0.167 | 2.644  | 1.73  | 8.43E-02 |
|  | <i>TMPRSS6</i> | rs4140589  | A | HET      | 1603 | 1.208  | 0.558 | 0.114  | 2.303  | 2.16  | 3.06E-02 |
|  | <i>TMPRSS6</i> | rs4140589  | A | GENO_2DF | 1603 | NA     | NA    | NA     | NA     | 5.30  | 7.08E-02 |
|  | <i>TMPRSS6</i> | rs5995380  | T | HOM      | 1681 | -2.155 | 1.335 | -4.771 | 0.461  | -1.62 | 1.07E-01 |
|  | <i>TMPRSS6</i> | rs5995380  | T | HET      | 1681 | -0.472 | 0.538 | -1.527 | 0.584  | -0.88 | 3.81E-01 |
|  | <i>TMPRSS6</i> | rs5995380  | T | GENO_2DF | 1681 | NA     | NA    | NA     | NA     | 3.08  | 2.14E-01 |
|  | <i>TMPRSS6</i> | rs11704654 | T | HOM      | 1723 | -2.460 | 1.266 | -4.942 | 0.022  | -1.94 | 5.23E-02 |
|  | <i>TMPRSS6</i> | rs11704654 | T | HET      | 1723 | -0.420 | 0.524 | -1.447 | 0.608  | -0.80 | 4.24E-01 |
|  | <i>TMPRSS6</i> | rs11704654 | T | GENO_2DF | 1723 | NA     | NA    | NA     | NA     | 4.08  | 1.30E-01 |
|  | <i>TMPRSS6</i> | rs5756515  | G | HOM      | 1684 | 1.292  | 0.703 | -0.085 | 2.669  | 1.84  | 6.60E-02 |
|  | <i>TMPRSS6</i> | rs5756515  | G | HET      | 1684 | 1.166  | 0.543 | 0.101  | 2.231  | 2.15  | 3.20E-02 |
|  | <i>TMPRSS6</i> | rs5756515  | G | GENO_2DF | 1684 | NA     | NA    | NA     | NA     | 5.47  | 6.49E-02 |

|  |                |           |   |          |      |        |       |        |        |       |          |
|--|----------------|-----------|---|----------|------|--------|-------|--------|--------|-------|----------|
|  | <i>TMPRSS6</i> | rs5756516 | T | HOM      | 1684 | 1.292  | 0.703 | -0.085 | 2.669  | 1.84  | 6.60E-02 |
|  | <i>TMPRSS6</i> | rs5756516 | T | HET      | 1684 | 1.166  | 0.543 | 0.101  | 2.231  | 2.15  | 3.20E-02 |
|  | <i>TMPRSS6</i> | rs5756516 | T | GENO_2DF | 1684 | NA     | NA    | NA     | NA     | 5.47  | 6.49E-02 |
|  | <i>TMPRSS6</i> | rs228909  | G | HOM      | 1803 | -1.030 | 1.144 | -3.271 | 1.212  | -0.90 | 3.68E-01 |
|  | <i>TMPRSS6</i> | rs228909  | G | HET      | 1803 | -0.414 | 0.506 | -1.407 | 0.579  | -0.82 | 4.14E-01 |
|  | <i>TMPRSS6</i> | rs228909  | G | GENO_2DF | 1803 | NA     | NA    | NA     | NA     | 1.29  | 5.24E-01 |
|  | <i>TMPRSS6</i> | rs228910  | A | HOM      | 1803 | -0.834 | 0.709 | -2.224 | 0.556  | -1.18 | 2.40E-01 |
|  | <i>TMPRSS6</i> | rs228910  | A | HET      | 1803 | 0.106  | 0.503 | -0.880 | 1.093  | 0.21  | 8.33E-01 |
|  | <i>TMPRSS6</i> | rs228910  | A | GENO_2DF | 1803 | NA     | NA    | NA     | NA     | 1.90  | 3.87E-01 |
|  | <i>TMPRSS6</i> | rs2235329 | C | HOM      | 1687 | 1.047  | 0.709 | -0.342 | 2.436  | 1.48  | 1.40E-01 |
|  | <i>TMPRSS6</i> | rs2235329 | C | HET      | 1687 | 1.097  | 0.541 | 0.037  | 2.157  | 2.03  | 4.26E-02 |
|  | <i>TMPRSS6</i> | rs2235329 | C | GENO_2DF | 1687 | NA     | NA    | NA     | NA     | 4.49  | 1.06E-01 |
|  | <i>TMPRSS6</i> | rs228913  | C | HOM      | 1803 | -0.283 | 1.262 | -2.757 | 2.190  | -0.22 | 8.22E-01 |
|  | <i>TMPRSS6</i> | rs228913  | C | HET      | 1803 | -0.309 | 0.509 | -1.307 | 0.689  | -0.61 | 5.44E-01 |
|  | <i>TMPRSS6</i> | rs228913  | C | GENO_2DF | 1803 | NA     | NA    | NA     | NA     | 0.39  | 8.23E-01 |
|  | <i>TMPRSS6</i> | rs228916  | C | HOM      | 1790 | -1.143 | 2.109 | -5.275 | 2.990  | -0.54 | 5.88E-01 |
|  | <i>TMPRSS6</i> | rs228916  | C | HET      | 1790 | -0.266 | 0.568 | -1.378 | 0.846  | -0.47 | 6.40E-01 |
|  | <i>TMPRSS6</i> | rs228916  | C | GENO_2DF | 1790 | NA     | NA    | NA     | NA     | 0.49  | 7.85E-01 |
|  | <i>TMPRSS6</i> | rs228918  | C | HOM      | 1802 | -1.178 | 0.672 | -2.494 | 0.139  | -1.75 | 7.98E-02 |
|  | <i>TMPRSS6</i> | rs228918  | C | HET      | 1802 | -0.625 | 0.515 | -1.633 | 0.384  | -1.21 | 2.25E-01 |
|  | <i>TMPRSS6</i> | rs228918  | C | GENO_2DF | 1802 | NA     | NA    | NA     | NA     | 3.32  | 1.90E-01 |
|  | <i>TMPRSS6</i> | rs228919  | T | HOM      | 1802 | -1.211 | 0.672 | -2.528 | 0.106  | -1.80 | 7.17E-02 |
|  | <i>TMPRSS6</i> | rs228919  | T | HET      | 1802 | -0.642 | 0.515 | -1.651 | 0.367  | -1.25 | 2.12E-01 |
|  | <i>TMPRSS6</i> | rs228919  | T | GENO_2DF | 1802 | NA     | NA    | NA     | NA     | 3.51  | 1.73E-01 |
|  | <i>TMPRSS6</i> | rs2092169 | T | HOM      | 1127 | 3.020  | 3.984 | -4.789 | 10.830 | 0.76  | 4.49E-01 |
|  | <i>TMPRSS6</i> | rs2092169 | T | HET      | 1127 | -0.029 | 0.812 | -1.621 | 1.562  | -0.04 | 9.71E-01 |
|  | <i>TMPRSS6</i> | rs2092169 | T | GENO_2DF | 1127 | NA     | NA    | NA     | NA     | 0.58  | 7.49E-01 |
|  | <i>TMPRSS6</i> | rs228921  | G | HOM      | 1801 | -1.211 | 0.672 | -2.529 | 0.107  | -1.80 | 7.18E-02 |
|  | <i>TMPRSS6</i> | rs228921  | G | HET      | 1801 | -0.646 | 0.515 | -1.655 | 0.363  | -1.25 | 2.10E-01 |
|  | <i>TMPRSS6</i> | rs228921  | G | GENO_2DF | 1801 | NA     | NA    | NA     | NA     | 3.52  | 1.72E-01 |
|  | <i>TMPRSS6</i> | rs3076475 | T | HOM      | 1065 | 2.113  | 1.414 | -0.659 | 4.885  | 1.49  | 1.36E-01 |
|  | <i>TMPRSS6</i> | rs3076475 | T | HET      | 1065 | 1.374  | 0.630 | 0.139  | 2.610  | 2.18  | 2.94E-02 |
|  | <i>TMPRSS6</i> | rs3076475 | T | GENO_2DF | 1065 | NA     | NA    | NA     | NA     | 6.10  | 4.73E-02 |

|      |                |            |   |          |      |        |       |        |        |       |          |
|------|----------------|------------|---|----------|------|--------|-------|--------|--------|-------|----------|
|      | <i>TMPRSS6</i> | rs228924   | A | HOM      | 1803 | -1.146 | 2.110 | -5.281 | 2.990  | -0.54 | 5.87E-01 |
|      | <i>TMPRSS6</i> | rs228924   | A | HET      | 1803 | -0.358 | 0.562 | -1.458 | 0.743  | -0.64 | 5.24E-01 |
|      | <i>TMPRSS6</i> | rs228924   | A | GENO_2DF | 1803 | NA     | NA    | NA     | NA     | 0.66  | 7.18E-01 |
|      | <i>TMPRSS6</i> | rs228925   | A | HOM      | 1126 | -0.497 | 1.293 | -3.031 | 2.037  | -0.38 | 7.01E-01 |
|      | <i>TMPRSS6</i> | rs228925   | A | HET      | 1126 | -0.219 | 0.618 | -1.430 | 0.992  | -0.35 | 7.23E-01 |
|      | <i>TMPRSS6</i> | rs228925   | A | GENO_2DF | 1126 | NA     | NA    | NA     | NA     | 0.23  | 8.90E-01 |
|      | <i>TMPRSS6</i> | rs5756520  | A | HOM      | 1799 | -1.212 | 0.672 | -2.530 | 0.106  | -1.80 | 7.16E-02 |
|      | <i>TMPRSS6</i> | rs5756520  | A | HET      | 1799 | -0.666 | 0.515 | -1.676 | 0.344  | -1.29 | 1.96E-01 |
|      | <i>TMPRSS6</i> | rs5756520  | A | GENO_2DF | 1799 | NA     | NA    | NA     | NA     | 3.57  | 1.68E-01 |
|      | <i>TMPRSS6</i> | rs11914132 | T | HOM      | 1804 | -1.556 | 0.963 | -3.443 | 0.331  | -1.62 | 1.06E-01 |
|      | <i>TMPRSS6</i> | rs11914132 | T | HET      | 1804 | -0.543 | 0.496 | -1.516 | 0.430  | -1.09 | 2.74E-01 |
|      | <i>TMPRSS6</i> | rs11914132 | T | GENO_2DF | 1804 | NA     | NA    | NA     | NA     | 3.26  | 1.96E-01 |
|      | <i>TMPRSS6</i> | rs738297   | C | HOM      | 1793 | -0.199 | 1.283 | -2.714 | 2.316  | -0.16 | 8.77E-01 |
|      | <i>TMPRSS6</i> | rs738297   | C | HET      | 1793 | -0.427 | 0.516 | -1.437 | 0.584  | -0.83 | 4.08E-01 |
|      | <i>TMPRSS6</i> | rs738297   | C | GENO_2DF | 1793 | NA     | NA    | NA     | NA     | 0.69  | 7.09E-01 |
|      | <i>TMPRSS6</i> | rs11089823 | C | HOM      | 1796 | -1.545 | 0.959 | -3.425 | 0.334  | -1.61 | 1.07E-01 |
|      | <i>TMPRSS6</i> | rs11089823 | C | HET      | 1796 | -0.551 | 0.495 | -1.522 | 0.419  | -1.11 | 2.66E-01 |
|      | <i>TMPRSS6</i> | rs11089823 | C | GENO_2DF | 1796 | NA     | NA    | NA     | NA     | 3.28  | 1.94E-01 |
|      | <i>TMPRSS6</i> | rs11089824 | C | HOM      | 1796 | -1.545 | 0.959 | -3.425 | 0.334  | -1.61 | 1.07E-01 |
|      | <i>TMPRSS6</i> | rs11089824 | C | HET      | 1796 | -0.551 | 0.495 | -1.522 | 0.419  | -1.11 | 2.66E-01 |
|      | <i>TMPRSS6</i> | rs11089824 | C | GENO_2DF | 1796 | NA     | NA    | NA     | NA     | 3.28  | 1.94E-01 |
| TIBC | <i>HFE</i>     | rs9295687  | C | HOM      | 1745 | -1.254 | 0.619 | -2.467 | -0.041 | -2.03 | 4.29E-02 |
|      | <i>HFE</i>     | rs9295687  | C | HET      | 1745 | -0.221 | 0.462 | -1.127 | 0.685  | -0.48 | 6.33E-01 |
|      | <i>HFE</i>     | rs9295687  | C | GENO_2DF | 1745 | NA     | NA    | NA     | NA     | 4.28  | 1.18E-01 |
|      | <i>HFE</i>     | rs4529296  | G | HOM      | 1745 | -1.254 | 0.619 | -2.467 | -0.041 | -2.03 | 4.29E-02 |
|      | <i>HFE</i>     | rs4529296  | G | HET      | 1745 | -0.221 | 0.462 | -1.127 | 0.685  | -0.48 | 6.33E-01 |
|      | <i>HFE</i>     | rs4529296  | G | GENO_2DF | 1745 | NA     | NA    | NA     | NA     | 4.28  | 1.18E-01 |
|      | <i>HFE</i>     | rs9379825  | A | HOM      | 1745 | -1.254 | 0.619 | -2.467 | -0.041 | -2.03 | 4.29E-02 |
|      | <i>HFE</i>     | rs9379825  | A | HET      | 1745 | -0.221 | 0.462 | -1.127 | 0.685  | -0.48 | 6.33E-01 |
|      | <i>HFE</i>     | rs9379825  | A | GENO_2DF | 1745 | NA     | NA    | NA     | NA     | 4.28  | 1.18E-01 |
|      | <i>HFE</i>     | rs9467672  | T | HOM      | 1745 | -1.254 | 0.619 | -2.467 | -0.041 | -2.03 | 4.29E-02 |
|      | <i>HFE</i>     | rs9467672  | T | HET      | 1745 | -0.221 | 0.462 | -1.127 | 0.685  | -0.48 | 6.33E-01 |
|      | <i>HFE</i>     | rs9467672  | T | GENO_2DF | 1745 | NA     | NA    | NA     | NA     | 4.28  | 1.18E-01 |

|  |            |           |   |          |      |        |       |         |        |       |          |
|--|------------|-----------|---|----------|------|--------|-------|---------|--------|-------|----------|
|  | <i>HFE</i> | rs9295688 | A | HOM      | 1744 | -1.292 | 0.619 | -2.506  | -0.078 | -2.09 | 3.71E-02 |
|  | <i>HFE</i> | rs9295688 | A | HET      | 1744 | -0.220 | 0.462 | -1.126  | 0.686  | -0.48 | 6.34E-01 |
|  | <i>HFE</i> | rs9295688 | A | GENO_2DF | 1744 | NA     | NA    | NA      | NA     | 4.55  | 1.03E-01 |
|  | <i>HFE</i> | rs2006736 | T | HOM      | 1744 | -1.292 | 0.619 | -2.506  | -0.078 | -2.09 | 3.71E-02 |
|  | <i>HFE</i> | rs2006736 | T | HET      | 1744 | -0.220 | 0.462 | -1.126  | 0.686  | -0.48 | 6.34E-01 |
|  | <i>HFE</i> | rs2006736 | T | GENO_2DF | 1744 | NA     | NA    | NA      | NA     | 4.55  | 1.03E-01 |
|  | <i>HFE</i> | rs1800702 | G | HOM      | 1744 | -1.292 | 0.619 | -2.506  | -0.078 | -2.09 | 3.71E-02 |
|  | <i>HFE</i> | rs1800702 | G | HET      | 1744 | -0.220 | 0.462 | -1.126  | 0.686  | -0.48 | 6.34E-01 |
|  | <i>HFE</i> | rs1800702 | G | GENO_2DF | 1744 | NA     | NA    | NA      | NA     | 4.55  | 1.03E-01 |
|  | <i>HFE</i> | rs2794720 | C | HOM      | 1744 | -1.292 | 0.619 | -2.506  | -0.078 | -2.09 | 3.71E-02 |
|  | <i>HFE</i> | rs2794720 | C | HET      | 1744 | -0.220 | 0.462 | -1.126  | 0.686  | -0.48 | 6.34E-01 |
|  | <i>HFE</i> | rs2794720 | C | GENO_2DF | 1744 | NA     | NA    | NA      | NA     | 4.55  | 1.03E-01 |
|  | <i>HFE</i> | rs2794719 | G | HOM      | 1744 | -1.292 | 0.619 | -2.506  | -0.078 | -2.09 | 3.71E-02 |
|  | <i>HFE</i> | rs2794719 | G | HET      | 1744 | -0.220 | 0.462 | -1.126  | 0.686  | -0.48 | 6.34E-01 |
|  | <i>HFE</i> | rs2794719 | G | GENO_2DF | 1744 | NA     | NA    | NA      | NA     | 4.55  | 1.03E-01 |
|  | <i>HFE</i> | rs9366637 | T | HOM      | 1804 | 1.424  | 3.325 | -5.094  | 7.941  | 0.43  | 6.69E-01 |
|  | <i>HFE</i> | rs9366637 | T | HET      | 1804 | -1.184 | 0.675 | -2.507  | 0.138  | -1.76 | 7.93E-02 |
|  | <i>HFE</i> | rs9366637 | T | GENO_2DF | 1804 | NA     | NA    | NA      | NA     | 3.30  | 1.92E-01 |
|  | <i>HFE</i> | rs1799945 | G | HOM      | 1755 | -1.267 | 1.220 | -3.659  | 1.125  | -1.04 | 2.99E-01 |
|  | <i>HFE</i> | rs1799945 | G | HET      | 1755 | -0.663 | 0.496 | -1.635  | 0.310  | -1.34 | 1.82E-01 |
|  | <i>HFE</i> | rs1799945 | G | GENO_2DF | 1755 | NA     | NA    | NA      | NA     | 2.61  | 2.71E-01 |
|  | <i>HFE</i> | rs2071303 | C | HOM      | 1804 | -0.999 | 0.669 | -2.310  | 0.312  | -1.49 | 1.35E-01 |
|  | <i>HFE</i> | rs2071303 | C | HET      | 1804 | -0.604 | 0.442 | -1.470  | 0.262  | -1.37 | 1.72E-01 |
|  | <i>HFE</i> | rs2071303 | C | GENO_2DF | 1804 | NA     | NA    | NA      | NA     | 3.06  | 2.16E-01 |
|  | <i>HFE</i> | rs1800562 | A | HOM      | 1804 | -9.578 | 4.365 | -18.130 | -1.023 | -2.19 | 2.83E-02 |
|  | <i>HFE</i> | rs1800562 | A | HET      | 1804 | -3.050 | 0.639 | -4.302  | -1.799 | -4.78 | 1.93E-06 |
|  | <i>HFE</i> | rs1800562 | A | GENO_2DF | 1804 | NA     | NA    | NA      | NA     | 27.32 | 1.17E-06 |
|  | <i>HFE</i> | rs1800708 | C | HOM      | 1803 | 2.137  | 3.592 | -4.903  | 9.178  | 0.60  | 5.52E-01 |
|  | <i>HFE</i> | rs1800708 | C | HET      | 1803 | -1.022 | 0.663 | -2.321  | 0.277  | -1.54 | 1.23E-01 |
|  | <i>HFE</i> | rs1800708 | C | GENO_2DF | 1803 | NA     | NA    | NA      | NA     | 2.77  | 2.50E-01 |
|  | <i>HFE</i> | rs2858996 | T | HOM      | 1803 | 0.645  | 1.120 | -1.550  | 2.840  | 0.58  | 5.65E-01 |
|  | <i>HFE</i> | rs2858996 | T | HET      | 1803 | -0.080 | 0.442 | -0.946  | 0.786  | -0.18 | 8.57E-01 |
|  | <i>HFE</i> | rs2858996 | T | GENO_2DF | 1803 | NA     | NA    | NA      | NA     | 0.40  | 8.19E-01 |

|  |     |            |   |          |      |        |       |        |       |       |          |
|--|-----|------------|---|----------|------|--------|-------|--------|-------|-------|----------|
|  | HFE | rs1572982  | A | HOM      | 1804 | -0.437 | 0.595 | -1.602 | 0.729 | -0.73 | 4.63E-01 |
|  | HFE | rs1572982  | A | HET      | 1804 | -0.277 | 0.482 | -1.222 | 0.668 | -0.57 | 5.66E-01 |
|  | HFE | rs1572982  | A | GENO_2DF | 1804 | NA     | NA    | NA     | NA    | 0.59  | 7.44E-01 |
|  | HFE | rs707889   | A | HOM      | 1804 | 0.644  | 1.120 | -1.551 | 2.839 | 0.58  | 5.65E-01 |
|  | HFE | rs707889   | A | HET      | 1804 | -0.095 | 0.442 | -0.961 | 0.770 | -0.22 | 8.29E-01 |
|  | HFE | rs707889   | A | GENO_2DF | 1804 | NA     | NA    | NA     | NA    | 0.42  | 8.11E-01 |
|  | HFE | rs1045537  | C | HOM      | 1753 | -0.706 | 1.572 | -3.787 | 2.375 | -0.45 | 6.54E-01 |
|  | HFE | rs1045537  | C | HET      | 1753 | 0.153  | 0.508 | -0.842 | 1.147 | 0.30  | 7.63E-01 |
|  | HFE | rs1045537  | C | GENO_2DF | 1753 | NA     | NA    | NA     | NA    | 0.31  | 8.55E-01 |
|  | HFE | rs12346    | T | HOM      | 1804 | 0.117  | 0.704 | -1.264 | 1.498 | 0.17  | 8.68E-01 |
|  | HFE | rs12346    | T | HET      | 1804 | 0.500  | 0.438 | -0.358 | 1.357 | 1.14  | 2.54E-01 |
|  | HFE | rs12346    | T | GENO_2DF | 1804 | NA     | NA    | NA     | NA    | 1.35  | 5.10E-01 |
|  | HFE | rs17596719 | A | HOM      | 1802 | 2.585  | 1.975 | -1.286 | 6.456 | 1.31  | 1.91E-01 |
|  | HFE | rs17596719 | A | HET      | 1802 | 0.578  | 0.520 | -0.441 | 1.596 | 1.11  | 2.67E-01 |
|  | HFE | rs17596719 | A | GENO_2DF | 1802 | NA     | NA    | NA     | NA    | 2.80  | 2.46E-01 |
|  | HFE | rs6918586  | C | HOM      | 1801 | -0.204 | 0.618 | -1.416 | 1.008 | -0.33 | 7.42E-01 |
|  | HFE | rs6918586  | C | HET      | 1801 | -0.024 | 0.457 | -0.919 | 0.871 | -0.05 | 9.59E-01 |
|  | HFE | rs6918586  | C | GENO_2DF | 1801 | NA     | NA    | NA     | NA    | 0.12  | 9.43E-01 |
|  | HFE | rs9393685  | C | HOM      | 1797 | 2.136  | 3.594 | -4.908 | 9.180 | 0.59  | 5.52E-01 |
|  | HFE | rs9393685  | C | HET      | 1797 | -0.904 | 0.648 | -2.173 | 0.365 | -1.40 | 1.63E-01 |
|  | HFE | rs9393685  | C | GENO_2DF | 1797 | NA     | NA    | NA     | NA    | 2.34  | 3.10E-01 |
|  | HFE | rs1150659  | A | HOM      | 1802 | 0.756  | 1.112 | -1.425 | 2.936 | 0.68  | 4.97E-01 |
|  | HFE | rs1150659  | A | HET      | 1802 | -0.098 | 0.443 | -0.965 | 0.769 | -0.22 | 8.25E-01 |
|  | HFE | rs1150659  | A | GENO_2DF | 1802 | NA     | NA    | NA     | NA    | 0.56  | 7.55E-01 |
|  | HFE | rs1150660  | A | HOM      | 1804 | 0.117  | 0.704 | -1.264 | 1.498 | 0.17  | 8.68E-01 |
|  | HFE | rs1150660  | A | HET      | 1804 | 0.500  | 0.438 | -0.358 | 1.357 | 1.14  | 2.54E-01 |
|  | HFE | rs1150660  | A | GENO_2DF | 1804 | NA     | NA    | NA     | NA    | 1.35  | 5.10E-01 |
|  | HFE | rs198857   | G | HOM      | 1802 | -0.456 | 0.595 | -1.622 | 0.710 | -0.77 | 4.43E-01 |
|  | HFE | rs198857   | G | HET      | 1802 | -0.300 | 0.483 | -1.246 | 0.646 | -0.62 | 5.34E-01 |
|  | HFE | rs198857   | G | GENO_2DF | 1802 | NA     | NA    | NA     | NA    | 0.66  | 7.20E-01 |
|  | HFE | rs198856   | G | HOM      | 1802 | -0.456 | 0.595 | -1.622 | 0.710 | -0.77 | 4.43E-01 |
|  | HFE | rs198856   | G | HET      | 1802 | -0.300 | 0.483 | -1.246 | 0.646 | -0.62 | 5.34E-01 |
|  | HFE | rs198856   | G | GENO_2DF | 1802 | NA     | NA    | NA     | NA    | 0.66  | 7.20E-01 |

|  |                |           |   |          |      |        |       |        |        |       |          |
|--|----------------|-----------|---|----------|------|--------|-------|--------|--------|-------|----------|
|  | <i>HFE</i>     | rs1543680 | A | HOM      | 1798 | 0.551  | 1.119 | -1.643 | 2.745  | 0.49  | 6.23E-01 |
|  | <i>HFE</i>     | rs1543680 | A | HET      | 1798 | -0.042 | 0.444 | -0.912 | 0.828  | -0.09 | 9.24E-01 |
|  | <i>HFE</i>     | rs1543680 | A | GENO_2DF | 1798 | NA     | NA    | NA     | NA     | 0.27  | 8.74E-01 |
|  | <i>HFE</i>     | rs198855  | A | HOM      | 1755 | -0.074 | 0.818 | -1.677 | 1.530  | -0.09 | 9.28E-01 |
|  | <i>HFE</i>     | rs198855  | A | HET      | 1755 | -0.148 | 0.445 | -1.020 | 0.723  | -0.33 | 7.39E-01 |
|  | <i>HFE</i>     | rs198855  | A | GENO_2DF | 1755 | NA     | NA    | NA     | NA     | 0.11  | 9.46E-01 |
|  | <i>HFE</i>     | rs7743957 | C | HOM      | 1797 | 2.136  | 3.594 | -4.908 | 9.180  | 0.59  | 5.52E-01 |
|  | <i>HFE</i>     | rs7743957 | C | HET      | 1797 | -0.904 | 0.648 | -2.173 | 0.365  | -1.40 | 1.63E-01 |
|  | <i>HFE</i>     | rs7743957 | C | GENO_2DF | 1797 | NA     | NA    | NA     | NA     | 2.34  | 3.10E-01 |
|  | <i>HFE</i>     | rs198854  | T | HOM      | 1803 | -0.468 | 0.594 | -1.632 | 0.697  | -0.79 | 4.31E-01 |
|  | <i>HFE</i>     | rs198854  | T | HET      | 1803 | -0.300 | 0.483 | -1.246 | 0.646  | -0.62 | 5.34E-01 |
|  | <i>HFE</i>     | rs198854  | T | GENO_2DF | 1803 | NA     | NA    | NA     | NA     | 0.68  | 7.11E-01 |
|  | <i>HFE</i>     | rs198853  | C | HOM      | 1804 | 0.117  | 0.704 | -1.264 | 1.498  | 0.17  | 8.68E-01 |
|  | <i>HFE</i>     | rs198853  | C | HET      | 1804 | 0.500  | 0.438 | -0.358 | 1.357  | 1.14  | 2.54E-01 |
|  | <i>HFE</i>     | rs198853  | C | GENO_2DF | 1804 | NA     | NA    | NA     | NA     | 1.35  | 5.10E-01 |
|  | <i>HFE</i>     | rs2229768 | C | HOM      | 1803 | 0.759  | 1.112 | -1.420 | 2.939  | 0.68  | 4.95E-01 |
|  | <i>HFE</i>     | rs2229768 | C | HET      | 1803 | -0.094 | 0.442 | -0.961 | 0.773  | -0.21 | 8.32E-01 |
|  | <i>HFE</i>     | rs2229768 | C | GENO_2DF | 1803 | NA     | NA    | NA     | NA     | 0.56  | 7.55E-01 |
|  | <i>HFE</i>     | rs198852  | G | HOM      | 1804 | -1.275 | 0.625 | -2.501 | -0.050 | -2.04 | 4.15E-02 |
|  | <i>HFE</i>     | rs198852  | G | HET      | 1804 | -0.251 | 0.454 | -1.141 | 0.638  | -0.55 | 5.80E-01 |
|  | <i>HFE</i>     | rs198852  | G | GENO_2DF | 1804 | NA     | NA    | NA     | NA     | 4.26  | 1.19E-01 |
|  | <i>HFE</i>     | rs198851  | T | HOM      | 1646 | -1.435 | 1.381 | -4.143 | 1.272  | -1.04 | 2.99E-01 |
|  | <i>HFE</i>     | rs198851  | T | HET      | 1646 | -0.830 | 0.527 | -1.863 | 0.203  | -1.57 | 1.16E-01 |
|  | <i>HFE</i>     | rs198851  | T | GENO_2DF | 1646 | NA     | NA    | NA     | NA     | 3.31  | 1.91E-01 |
|  | <i>HFE</i>     | rs198848  | T | HOM      | 1804 | -1.275 | 0.625 | -2.501 | -0.050 | -2.04 | 4.15E-02 |
|  | <i>HFE</i>     | rs198848  | T | HET      | 1804 | -0.251 | 0.454 | -1.141 | 0.638  | -0.55 | 5.80E-01 |
|  | <i>HFE</i>     | rs198848  | T | GENO_2DF | 1804 | NA     | NA    | NA     | NA     | 4.26  | 1.19E-01 |
|  | <i>TMPRSS6</i> | rs2235320 | T | HOM      | 1803 | 0.533  | 1.706 | -2.811 | 3.877  | 0.31  | 7.55E-01 |
|  | <i>TMPRSS6</i> | rs2235320 | T | HET      | 1803 | 0.593  | 0.498 | -0.384 | 1.569  | 1.19  | 2.34E-01 |
|  | <i>TMPRSS6</i> | rs2235320 | T | GENO_2DF | 1803 | NA     | NA    | NA     | NA     | 1.47  | 4.79E-01 |
|  | <i>TMPRSS6</i> | rs2235321 | A | HOM      | 1560 | -1.286 | 0.751 | -2.757 | 0.185  | -1.71 | 8.69E-02 |
|  | <i>TMPRSS6</i> | rs2235321 | A | HET      | 1560 | -0.825 | 0.480 | -1.766 | 0.115  | -1.72 | 8.57E-02 |
|  | <i>TMPRSS6</i> | rs2235321 | A | GENO_2DF | 1560 | NA     | NA    | NA     | NA     | 4.36  | 1.13E-01 |



|  |                |            |   |          |      |        |       |        |        |       |          |
|--|----------------|------------|---|----------|------|--------|-------|--------|--------|-------|----------|
|  | <i>TMPRSS6</i> | rs855791   | A | HOM      | 1804 | 1.155  | 0.601 | -0.022 | 2.333  | 1.92  | 5.46E-02 |
|  | <i>TMPRSS6</i> | rs855791   | A | HET      | 1804 | 0.741  | 0.480 | -0.200 | 1.681  | 1.54  | 1.23E-01 |
|  | <i>TMPRSS6</i> | rs855791   | A | GENO_2DF | 1804 | NA     | NA    | NA     | NA     | 4.13  | 1.27E-01 |
|  | <i>TMPRSS6</i> | rs5756504  | T | HOM      | 1603 | -0.788 | 0.756 | -2.271 | 0.695  | -1.04 | 2.98E-01 |
|  | <i>TMPRSS6</i> | rs5756504  | T | HET      | 1603 | -0.804 | 0.468 | -1.721 | 0.113  | -1.72 | 8.59E-02 |
|  | <i>TMPRSS6</i> | rs5756504  | T | GENO_2DF | 1603 | NA     | NA    | NA     | NA     | 3.20  | 2.02E-01 |
|  | <i>TMPRSS6</i> | rs5756505  | C | HOM      | 1647 | -0.792 | 0.705 | -2.173 | 0.589  | -1.12 | 2.61E-01 |
|  | <i>TMPRSS6</i> | rs5756505  | C | HET      | 1647 | -1.050 | 0.470 | -1.970 | -0.129 | -2.24 | 2.55E-02 |
|  | <i>TMPRSS6</i> | rs5756505  | C | GENO_2DF | 1647 | NA     | NA    | NA     | NA     | 5.08  | 7.87E-02 |
|  | <i>TMPRSS6</i> | rs5756506  | C | HOM      | 1635 | -0.973 | 0.736 | -2.415 | 0.470  | -1.32 | 1.86E-01 |
|  | <i>TMPRSS6</i> | rs5756506  | C | HET      | 1635 | -0.842 | 0.464 | -1.752 | 0.068  | -1.81 | 6.99E-02 |
|  | <i>TMPRSS6</i> | rs5756506  | C | GENO_2DF | 1635 | NA     | NA    | NA     | NA     | 3.85  | 1.46E-01 |
|  | <i>TMPRSS6</i> | rs4820268  | G | HOM      | 1799 | 1.063  | 0.598 | -0.109 | 2.236  | 1.78  | 7.57E-02 |
|  | <i>TMPRSS6</i> | rs4820268  | G | HET      | 1799 | 0.509  | 0.490 | -0.450 | 1.469  | 1.04  | 2.99E-01 |
|  | <i>TMPRSS6</i> | rs4820268  | G | GENO_2DF | 1799 | NA     | NA    | NA     | NA     | 3.17  | 2.05E-01 |
|  | <i>TMPRSS6</i> | rs13055107 | A | HOM      | 1603 | -3.401 | 1.898 | -7.122 | 0.320  | -1.79 | 7.34E-02 |
|  | <i>TMPRSS6</i> | rs13055107 | A | HET      | 1603 | 0.678  | 0.553 | -0.405 | 1.761  | 1.23  | 2.20E-01 |
|  | <i>TMPRSS6</i> | rs13055107 | A | GENO_2DF | 1603 | NA     | NA    | NA     | NA     | 4.99  | 8.24E-02 |
|  | <i>TMPRSS6</i> | rs2413450  | T | HOM      | 1719 | 1.099  | 0.624 | -0.124 | 2.321  | 1.76  | 7.84E-02 |
|  | <i>TMPRSS6</i> | rs2413450  | T | HET      | 1719 | 0.488  | 0.500 | -0.491 | 1.467  | 0.98  | 3.29E-01 |
|  | <i>TMPRSS6</i> | rs2413450  | T | GENO_2DF | 1719 | NA     | NA    | NA     | NA     | 3.11  | 2.12E-01 |
|  | <i>TMPRSS6</i> | rs855789   | C | HOM      | 1799 | 4.787  | 6.210 | -7.384 | 16.960 | 0.77  | 4.41E-01 |
|  | <i>TMPRSS6</i> | rs855789   | C | HET      | 1799 | -0.015 | 0.708 | -1.404 | 1.373  | -0.02 | 9.83E-01 |
|  | <i>TMPRSS6</i> | rs855789   | C | GENO_2DF | 1799 | NA     | NA    | NA     | NA     | 0.60  | 7.43E-01 |
|  | <i>TMPRSS6</i> | rs855788   | A | HOM      | 1803 | -1.459 | 0.651 | -2.734 | -0.183 | -2.24 | 2.51E-02 |
|  | <i>TMPRSS6</i> | rs855788   | A | HET      | 1803 | -0.874 | 0.450 | -1.756 | 0.007  | -1.94 | 5.20E-02 |
|  | <i>TMPRSS6</i> | rs855788   | A | GENO_2DF | 1803 | NA     | NA    | NA     | NA     | 6.35  | 4.19E-02 |
|  | <i>TMPRSS6</i> | rs17750017 | A | HOM      | 1790 | NA     | NA    | NA     | NA     | NA    | NA       |
|  | <i>TMPRSS6</i> | rs17750017 | A | HET      | 1790 | NA     | NA    | NA     | NA     | NA    | NA       |
|  | <i>TMPRSS6</i> | rs17750017 | A | GENO_2DF | 1790 | NA     | NA    | NA     | NA     | NA    | NA       |
|  | <i>TMPRSS6</i> | rs2743820  | C | HOM      | 1575 | -1.409 | 0.722 | -2.825 | 0.007  | -1.95 | 5.14E-02 |
|  | <i>TMPRSS6</i> | rs2743820  | C | HET      | 1575 | -0.772 | 0.477 | -1.707 | 0.164  | -1.62 | 1.06E-01 |
|  | <i>TMPRSS6</i> | rs2743820  | C | GENO_2DF | 1575 | NA     | NA    | NA     | NA     | 4.77  | 9.21E-02 |

|  |                |           |   |          |      |        |       |        |        |       |          |
|--|----------------|-----------|---|----------|------|--------|-------|--------|--------|-------|----------|
|  | <i>TMPRSS6</i> | rs1005478 | A | HOM      | 1535 | 1.064  | 0.702 | -0.311 | 2.440  | 1.52  | 1.30E-01 |
|  | <i>TMPRSS6</i> | rs1005478 | A | HET      | 1535 | -0.191 | 0.481 | -1.134 | 0.752  | -0.40 | 6.92E-01 |
|  | <i>TMPRSS6</i> | rs1005478 | A | GENO_2DF | 1535 | NA     | NA    | NA     | NA     | 3.30  | 1.93E-01 |
|  | <i>TMPRSS6</i> | rs7286184 | G | HOM      | 1544 | 0.095  | 1.038 | -1.939 | 2.128  | 0.09  | 9.28E-01 |
|  | <i>TMPRSS6</i> | rs7286184 | G | HET      | 1544 | 0.690  | 0.480 | -0.251 | 1.631  | 1.44  | 1.51E-01 |
|  | <i>TMPRSS6</i> | rs7286184 | G | GENO_2DF | 1544 | NA     | NA    | NA     | NA     | 2.09  | 3.52E-01 |
|  | <i>TMPRSS6</i> | rs2246092 | G | HOM      | 1534 | 1.231  | 0.699 | -0.139 | 2.602  | 1.76  | 7.84E-02 |
|  | <i>TMPRSS6</i> | rs2246092 | G | HET      | 1534 | -0.044 | 0.483 | -0.990 | 0.903  | -0.09 | 9.28E-01 |
|  | <i>TMPRSS6</i> | rs2246092 | G | GENO_2DF | 1534 | NA     | NA    | NA     | NA     | 3.71  | 1.56E-01 |
|  | <i>TMPRSS6</i> | rs2543519 | G | HOM      | 1559 | 0.132  | 0.923 | -1.677 | 1.940  | 0.14  | 8.87E-01 |
|  | <i>TMPRSS6</i> | rs2543519 | G | HET      | 1559 | 0.475  | 0.473 | -0.453 | 1.403  | 1.00  | 3.16E-01 |
|  | <i>TMPRSS6</i> | rs2543519 | G | GENO_2DF | 1559 | NA     | NA    | NA     | NA     | 1.01  | 6.03E-01 |
|  | <i>TMPRSS6</i> | rs2111833 | T | HOM      | 1598 | -1.564 | 0.713 | -2.961 | -0.167 | -2.19 | 2.84E-02 |
|  | <i>TMPRSS6</i> | rs2111833 | T | HET      | 1598 | -0.785 | 0.470 | -1.705 | 0.135  | -1.67 | 9.46E-02 |
|  | <i>TMPRSS6</i> | rs2111833 | T | GENO_2DF | 1598 | NA     | NA    | NA     | NA     | 5.73  | 5.69E-02 |
|  | <i>TMPRSS6</i> | rs2179229 | G | HOM      | 1550 | 1.167  | 0.694 | -0.194 | 2.528  | 1.68  | 9.29E-02 |
|  | <i>TMPRSS6</i> | rs2179229 | G | HET      | 1550 | -0.055 | 0.481 | -0.999 | 0.888  | -0.11 | 9.09E-01 |
|  | <i>TMPRSS6</i> | rs2179229 | G | GENO_2DF | 1550 | NA     | NA    | NA     | NA     | 3.44  | 1.80E-01 |
|  | <i>TMPRSS6</i> | rs2235323 | C | HOM      | 1801 | -0.489 | 0.653 | -1.770 | 0.791  | -0.75 | 4.54E-01 |
|  | <i>TMPRSS6</i> | rs2235323 | C | HET      | 1801 | -0.578 | 0.449 | -1.458 | 0.301  | -1.29 | 1.98E-01 |
|  | <i>TMPRSS6</i> | rs2235323 | C | GENO_2DF | 1801 | NA     | NA    | NA     | NA     | 1.74  | 4.20E-01 |
|  | <i>TMPRSS6</i> | rs2235324 | C | HOM      | 1803 | -0.535 | 0.652 | -1.813 | 0.743  | -0.82 | 4.12E-01 |
|  | <i>TMPRSS6</i> | rs2235324 | C | HET      | 1803 | -0.587 | 0.449 | -1.466 | 0.292  | -1.31 | 1.91E-01 |
|  | <i>TMPRSS6</i> | rs2235324 | C | GENO_2DF | 1803 | NA     | NA    | NA     | NA     | 1.83  | 4.00E-01 |
|  | <i>TMPRSS6</i> | rs736852  | C | HOM      | 1790 | -0.418 | 0.632 | -1.657 | 0.821  | -0.66 | 5.08E-01 |
|  | <i>TMPRSS6</i> | rs736852  | C | HET      | 1790 | -0.797 | 0.460 | -1.699 | 0.104  | -1.73 | 8.31E-02 |
|  | <i>TMPRSS6</i> | rs736852  | C | GENO_2DF | 1790 | NA     | NA    | NA     | NA     | 3.01  | 2.22E-01 |
|  | <i>TMPRSS6</i> | rs2019848 | A | HOM      | 1739 | -0.010 | 0.962 | -1.895 | 1.874  | -0.01 | 9.92E-01 |
|  | <i>TMPRSS6</i> | rs2019848 | A | HET      | 1739 | 0.355  | 0.452 | -0.531 | 1.240  | 0.79  | 4.33E-01 |
|  | <i>TMPRSS6</i> | rs2019848 | A | GENO_2DF | 1739 | NA     | NA    | NA     | NA     | 0.64  | 7.27E-01 |
|  | <i>TMPRSS6</i> | rs1421312 | G | HOM      | 1803 | -0.499 | 0.643 | -1.759 | 0.761  | -0.78 | 4.38E-01 |
|  | <i>TMPRSS6</i> | rs1421312 | G | HET      | 1803 | -0.460 | 0.450 | -1.343 | 0.423  | -1.02 | 3.07E-01 |
|  | <i>TMPRSS6</i> | rs1421312 | G | GENO_2DF | 1803 | NA     | NA    | NA     | NA     | 1.21  | 5.47E-01 |

|  |                |           |   |          |          |        |       |        |       |       |          |
|--|----------------|-----------|---|----------|----------|--------|-------|--------|-------|-------|----------|
|  | <i>TMPRSS6</i> | rs2543514 | C | HOM      | 1795     | -0.419 | 0.631 | -1.655 | 0.818 | -0.66 | 5.07E-01 |
|  | <i>TMPRSS6</i> | rs2543514 | C | HET      | 1795     | -0.793 | 0.459 | -1.692 | 0.106 | -1.73 | 8.41E-02 |
|  | <i>TMPRSS6</i> | rs2543514 | C | GENO_2DF | 1795     | NA     | NA    | NA     | NA    | 2.99  | 2.24E-01 |
|  | <i>TMPRSS6</i> | rs2543513 | G | HOM      | 1795     | -0.419 | 0.631 | -1.655 | 0.818 | -0.66 | 5.07E-01 |
|  | <i>TMPRSS6</i> | rs2543513 | G | HET      | 1795     | -0.793 | 0.459 | -1.692 | 0.106 | -1.73 | 8.41E-02 |
|  | <i>TMPRSS6</i> | rs2543513 | G | GENO_2DF | 1795     | NA     | NA    | NA     | NA    | 2.99  | 2.24E-01 |
|  | <i>TMPRSS6</i> | rs2413451 | G | HOM      | 1795     | -0.419 | 0.631 | -1.655 | 0.818 | -0.66 | 5.07E-01 |
|  | <i>TMPRSS6</i> | rs2413451 | G | HET      | 1795     | -0.793 | 0.459 | -1.692 | 0.106 | -1.73 | 8.41E-02 |
|  | <i>TMPRSS6</i> | rs2413451 | G | GENO_2DF | 1795     | NA     | NA    | NA     | NA    | 2.99  | 2.24E-01 |
|  | <i>TMPRSS6</i> | rs2251655 | T | HOM      | 1795     | -0.419 | 0.631 | -1.655 | 0.818 | -0.66 | 5.07E-01 |
|  | <i>TMPRSS6</i> | rs2251655 | T | HET      | 1795     | -0.793 | 0.459 | -1.692 | 0.106 | -1.73 | 8.41E-02 |
|  | <i>TMPRSS6</i> | rs2251655 | T | GENO_2DF | 1795     | NA     | NA    | NA     | NA    | 2.99  | 2.24E-01 |
|  | <i>TMPRSS6</i> | rs2743824 | C | HOM      | 1793     | -0.413 | 0.632 | -1.650 | 0.825 | -0.65 | 5.14E-01 |
|  | <i>TMPRSS6</i> | rs2743824 | C | HET      | 1793     | -0.792 | 0.459 | -1.692 | 0.108 | -1.72 | 8.49E-02 |
|  | <i>TMPRSS6</i> | rs2743824 | C | GENO_2DF | 1793     | NA     | NA    | NA     | NA    | 2.98  | 2.25E-01 |
|  | <i>TMPRSS6</i> | rs2543509 | G | HOM      | 1793     | -0.413 | 0.632 | -1.650 | 0.825 | -0.65 | 5.14E-01 |
|  | <i>TMPRSS6</i> | rs2543509 | G | HET      | 1793     | -0.792 | 0.459 | -1.692 | 0.108 | -1.72 | 8.49E-02 |
|  | <i>TMPRSS6</i> | rs2543509 | G | GENO_2DF | 1793     | NA     | NA    | NA     | NA    | 2.98  | 2.25E-01 |
|  | <i>TMPRSS6</i> | rs2743825 | G | HOM      | 1792     | -0.413 | 0.632 | -1.651 | 0.825 | -0.65 | 5.14E-01 |
|  | <i>TMPRSS6</i> | rs2743825 | G | HET      | 1792     | -0.791 | 0.459 | -1.691 | 0.110 | -1.72 | 8.54E-02 |
|  | <i>TMPRSS6</i> | rs2743825 | G | GENO_2DF | 1792     | NA     | NA    | NA     | NA    | 2.97  | 2.26E-01 |
|  | <i>TMPRSS6</i> | rs2160906 | A | HOM      | 1803     | -0.056 | 0.887 | -1.795 | 1.683 | -0.06 | 9.50E-01 |
|  | <i>TMPRSS6</i> | rs2160906 | A | HET      | 1803     | 0.462  | 0.438 | -0.397 | 1.320 | 1.05  | 2.92E-01 |
|  | <i>TMPRSS6</i> | rs2160906 | A | GENO_2DF | 1803     | NA     | NA    | NA     | NA    | 1.18  | 5.53E-01 |
|  | <i>TMPRSS6</i> | rs732755  | C | HOM      | 1.73E+03 | -0.055 | 0.886 | -1.792 | 1.682 | -0.06 | 9.51E-01 |
|  | <i>TMPRSS6</i> | rs732755  | C | HET      | 1727     | 0.410  | 0.446 | -0.465 | 1.285 | 0.92  | 3.58E-01 |
|  | <i>TMPRSS6</i> | rs732755  | C | GENO_2DF | 1727     | NA     | NA    | NA     | NA    | 0.91  | 6.36E-01 |
|  | <i>TMPRSS6</i> | rs8139988 | C | HOM      | 1780     | 0.100  | 0.892 | -1.647 | 1.847 | 0.11  | 9.11E-01 |
|  | <i>TMPRSS6</i> | rs8139988 | C | HET      | 1780     | 0.431  | 0.441 | -0.434 | 1.296 | 0.98  | 3.29E-01 |
|  | <i>TMPRSS6</i> | rs8139988 | C | GENO_2DF | 1780     | NA     | NA    | NA     | NA    | 0.96  | 6.19E-01 |
|  | <i>TMPRSS6</i> | rs2017764 | A | HOM      | 1.77E+03 | -0.447 | 0.656 | -1.732 | 0.839 | -0.68 | 4.96E-01 |
|  | <i>TMPRSS6</i> | rs2017764 | A | HET      | 1772     | -0.435 | 0.453 | -1.323 | 0.453 | -0.96 | 3.37E-01 |
|  | <i>TMPRSS6</i> | rs2017764 | A | GENO_2DF | 1772     | NA     | NA    | NA     | NA    | 1.04  | 5.95E-01 |

|  |                |            |   |          |      |        |       |        |       |       |          |
|--|----------------|------------|---|----------|------|--------|-------|--------|-------|-------|----------|
|  | <i>TMPRSS6</i> | rs733655   | C | HOM      | 1774 | -0.011 | 0.831 | -1.640 | 1.618 | -0.01 | 9.90E-01 |
|  | <i>TMPRSS6</i> | rs733655   | C | HET      | 1774 | 0.330  | 0.442 | -0.536 | 1.196 | 0.75  | 4.55E-01 |
|  | <i>TMPRSS6</i> | rs733655   | C | GENO_2DF | 1774 | NA     | NA    | NA     | NA    | 0.59  | 7.45E-01 |
|  | <i>TMPRSS6</i> | rs2281090  | A | HOM      | 1775 | 0.050  | 0.904 | -1.721 | 1.821 | 0.06  | 9.56E-01 |
|  | <i>TMPRSS6</i> | rs2281090  | A | HET      | 1775 | 0.389  | 0.442 | -0.478 | 1.256 | 0.88  | 3.80E-01 |
|  | <i>TMPRSS6</i> | rs2281090  | A | GENO_2DF | 1775 | NA     | NA    | NA     | NA    | 0.78  | 6.76E-01 |
|  | <i>TMPRSS6</i> | rs2281091  | T | HOM      | 1773 | -0.112 | 0.907 | -1.890 | 1.666 | -0.12 | 9.02E-01 |
|  | <i>TMPRSS6</i> | rs2281091  | T | HET      | 1773 | 0.387  | 0.442 | -0.480 | 1.254 | 0.88  | 3.81E-01 |
|  | <i>TMPRSS6</i> | rs2281091  | T | GENO_2DF | 1773 | NA     | NA    | NA     | NA    | 0.85  | 6.53E-01 |
|  | <i>TMPRSS6</i> | rs228906   | A | HOM      | 1804 | 0.598  | 0.655 | -0.685 | 1.880 | 0.91  | 3.61E-01 |
|  | <i>TMPRSS6</i> | rs228906   | A | HET      | 1804 | -0.237 | 0.445 | -1.108 | 0.634 | -0.53 | 5.94E-01 |
|  | <i>TMPRSS6</i> | rs228906   | A | GENO_2DF | 1804 | NA     | NA    | NA     | NA    | 1.69  | 4.31E-01 |
|  | <i>TMPRSS6</i> | rs7289616  | A | HOM      | 1750 | -0.258 | 0.665 | -1.562 | 1.046 | -0.39 | 6.98E-01 |
|  | <i>TMPRSS6</i> | rs7289616  | A | HET      | 1750 | -0.375 | 0.454 | -1.265 | 0.515 | -0.83 | 4.09E-01 |
|  | <i>TMPRSS6</i> | rs7289616  | A | GENO_2DF | 1750 | NA     | NA    | NA     | NA    | 0.69  | 7.08E-01 |
|  | <i>TMPRSS6</i> | rs9619658  | T | HOM      | 1444 | 0.394  | 0.809 | -1.191 | 1.979 | 0.49  | 6.26E-01 |
|  | <i>TMPRSS6</i> | rs9619658  | T | HET      | 1444 | -0.303 | 0.491 | -1.265 | 0.660 | -0.62 | 5.38E-01 |
|  | <i>TMPRSS6</i> | rs9619658  | T | GENO_2DF | 1444 | NA     | NA    | NA     | NA    | 0.88  | 6.45E-01 |
|  | <i>TMPRSS6</i> | rs228907   | A | HOM      | 1801 | 0.097  | 0.780 | -1.432 | 1.625 | 0.12  | 9.01E-01 |
|  | <i>TMPRSS6</i> | rs228907   | A | HET      | 1801 | -0.195 | 0.439 | -1.055 | 0.665 | -0.44 | 6.57E-01 |
|  | <i>TMPRSS6</i> | rs228907   | A | GENO_2DF | 1801 | NA     | NA    | NA     | NA    | 0.25  | 8.81E-01 |
|  | <i>TMPRSS6</i> | rs17750152 | T | HOM      | 1067 | -0.416 | 1.275 | -2.915 | 2.082 | -0.33 | 7.44E-01 |
|  | <i>TMPRSS6</i> | rs17750152 | T | HET      | 1067 | -0.371 | 0.582 | -1.511 | 0.769 | -0.64 | 5.23E-01 |
|  | <i>TMPRSS6</i> | rs17750152 | T | GENO_2DF | 1067 | NA     | NA    | NA     | NA    | 0.46  | 7.95E-01 |
|  | <i>TMPRSS6</i> | rs4140590  | A | HOM      | 1570 | -0.011 | 0.647 | -1.279 | 1.257 | -0.02 | 9.87E-01 |
|  | <i>TMPRSS6</i> | rs4140590  | A | HET      | 1570 | -0.804 | 0.507 | -1.797 | 0.189 | -1.59 | 1.13E-01 |
|  | <i>TMPRSS6</i> | rs4140590  | A | GENO_2DF | 1570 | NA     | NA    | NA     | NA    | 3.26  | 1.96E-01 |
|  | <i>TMPRSS6</i> | rs4140589  | A | HOM      | 1603 | -0.071 | 0.641 | -1.328 | 1.186 | -0.11 | 9.12E-01 |
|  | <i>TMPRSS6</i> | rs4140589  | A | HET      | 1603 | -0.731 | 0.499 | -1.710 | 0.248 | -1.46 | 1.44E-01 |
|  | <i>TMPRSS6</i> | rs4140589  | A | GENO_2DF | 1603 | NA     | NA    | NA     | NA    | 2.60  | 2.73E-01 |
|  | <i>TMPRSS6</i> | rs5995380  | T | HOM      | 1681 | -0.245 | 1.195 | -2.588 | 2.098 | -0.20 | 8.38E-01 |
|  | <i>TMPRSS6</i> | rs5995380  | T | HET      | 1681 | 0.036  | 0.482 | -0.909 | 0.981 | 0.07  | 9.41E-01 |
|  | <i>TMPRSS6</i> | rs5995380  | T | GENO_2DF | 1681 | NA     | NA    | NA     | NA    | 0.05  | 9.74E-01 |

|  |                |            |   |          |      |        |       |         |       |       |          |
|--|----------------|------------|---|----------|------|--------|-------|---------|-------|-------|----------|
|  | <i>TMPRSS6</i> | rs11704654 | T | HOM      | 1723 | -0.561 | 1.136 | -2.788  | 1.667 | -0.49 | 6.22E-01 |
|  | <i>TMPRSS6</i> | rs11704654 | T | HET      | 1723 | 0.097  | 0.471 | -0.825  | 1.019 | 0.21  | 8.36E-01 |
|  | <i>TMPRSS6</i> | rs11704654 | T | GENO_2DF | 1723 | NA     | NA    | NA      | NA    | 0.32  | 8.53E-01 |
|  | <i>TMPRSS6</i> | rs5756515  | G | HOM      | 1684 | 0.156  | 0.626 | -1.071  | 1.383 | 0.25  | 8.03E-01 |
|  | <i>TMPRSS6</i> | rs5756515  | G | HET      | 1684 | -0.519 | 0.484 | -1.467  | 0.430 | -1.07 | 2.84E-01 |
|  | <i>TMPRSS6</i> | rs5756515  | G | GENO_2DF | 1684 | NA     | NA    | NA      | NA    | 1.89  | 3.88E-01 |
|  | <i>TMPRSS6</i> | rs5756516  | T | HOM      | 1684 | 0.156  | 0.626 | -1.071  | 1.383 | 0.25  | 8.03E-01 |
|  | <i>TMPRSS6</i> | rs5756516  | T | HET      | 1684 | -0.519 | 0.484 | -1.467  | 0.430 | -1.07 | 2.84E-01 |
|  | <i>TMPRSS6</i> | rs5756516  | T | GENO_2DF | 1684 | NA     | NA    | NA      | NA    | 1.89  | 3.88E-01 |
|  | <i>TMPRSS6</i> | rs228909   | G | HOM      | 1803 | -1.260 | 1.023 | -3.265  | 0.744 | -1.23 | 2.18E-01 |
|  | <i>TMPRSS6</i> | rs228909   | G | HET      | 1803 | 0.159  | 0.453 | -0.728  | 1.046 | 0.35  | 7.25E-01 |
|  | <i>TMPRSS6</i> | rs228909   | G | GENO_2DF | 1803 | NA     | NA    | NA      | NA    | 1.80  | 4.06E-01 |
|  | <i>TMPRSS6</i> | rs228910   | A | HOM      | 1803 | 0.423  | 0.634 | -0.821  | 1.666 | 0.67  | 5.05E-01 |
|  | <i>TMPRSS6</i> | rs228910   | A | HET      | 1803 | -0.041 | 0.450 | -0.923  | 0.841 | -0.09 | 9.27E-01 |
|  | <i>TMPRSS6</i> | rs228910   | A | GENO_2DF | 1803 | NA     | NA    | NA      | NA    | 0.59  | 7.46E-01 |
|  | <i>TMPRSS6</i> | rs2235329  | C | HOM      | 1687 | 0.125  | 0.637 | -1.123  | 1.373 | 0.20  | 8.44E-01 |
|  | <i>TMPRSS6</i> | rs2235329  | C | HET      | 1687 | -0.503 | 0.486 | -1.455  | 0.449 | -1.04 | 3.00E-01 |
|  | <i>TMPRSS6</i> | rs2235329  | C | GENO_2DF | 1687 | NA     | NA    | NA      | NA    | 1.65  | 4.38E-01 |
|  | <i>TMPRSS6</i> | rs228913   | C | HOM      | 1803 | -1.019 | 1.127 | -3.227  | 1.189 | -0.90 | 3.66E-01 |
|  | <i>TMPRSS6</i> | rs228913   | C | HET      | 1803 | 0.195  | 0.455 | -0.696  | 1.086 | 0.43  | 6.68E-01 |
|  | <i>TMPRSS6</i> | rs228913   | C | GENO_2DF | 1803 | NA     | NA    | NA      | NA    | 1.12  | 5.72E-01 |
|  | <i>TMPRSS6</i> | rs228916   | C | HOM      | 1790 | 1.657  | 1.885 | -2.038  | 5.352 | 0.88  | 3.80E-01 |
|  | <i>TMPRSS6</i> | rs228916   | C | HET      | 1790 | 0.591  | 0.507 | -0.403  | 1.585 | 1.17  | 2.44E-01 |
|  | <i>TMPRSS6</i> | rs228916   | C | GENO_2DF | 1790 | NA     | NA    | NA      | NA    | 2.02  | 3.65E-01 |
|  | <i>TMPRSS6</i> | rs228918   | C | HOM      | 1802 | -0.332 | 0.602 | -1.512  | 0.848 | -0.55 | 5.81E-01 |
|  | <i>TMPRSS6</i> | rs228918   | C | HET      | 1802 | 0.025  | 0.461 | -0.879  | 0.928 | 0.05  | 9.57E-01 |
|  | <i>TMPRSS6</i> | rs228918   | C | GENO_2DF | 1802 | NA     | NA    | NA      | NA    | 0.41  | 8.14E-01 |
|  | <i>TMPRSS6</i> | rs228919   | T | HOM      | 1802 | -0.307 | 0.602 | -1.486  | 0.872 | -0.51 | 6.10E-01 |
|  | <i>TMPRSS6</i> | rs228919   | T | HET      | 1802 | 0.035  | 0.461 | -0.868  | 0.938 | 0.08  | 9.39E-01 |
|  | <i>TMPRSS6</i> | rs228919   | T | GENO_2DF | 1802 | NA     | NA    | NA      | NA    | 0.37  | 8.31E-01 |
|  | <i>TMPRSS6</i> | rs2092169  | T | HOM      | 1127 | -3.004 | 3.663 | -10.180 | 4.176 | -0.82 | 4.12E-01 |
|  | <i>TMPRSS6</i> | rs2092169  | T | HET      | 1127 | 0.245  | 0.747 | -1.218  | 1.708 | 0.33  | 7.43E-01 |
|  | <i>TMPRSS6</i> | rs2092169  | T | GENO_2DF | 1127 | NA     | NA    | NA      | NA    | 0.80  | 6.71E-01 |

|  |                |            |   |          |      |        |       |        |       |       |          |
|--|----------------|------------|---|----------|------|--------|-------|--------|-------|-------|----------|
|  | <i>TMPRSS6</i> | rs228921   | G | HOM      | 1801 | -0.307 | 0.602 | -1.486 | 0.872 | -0.51 | 6.10E-01 |
|  | <i>TMPRSS6</i> | rs228921   | G | HET      | 1801 | 0.047  | 0.461 | -0.856 | 0.950 | 0.10  | 9.19E-01 |
|  | <i>TMPRSS6</i> | rs228921   | G | GENO_2DF | 1801 | NA     | NA    | NA     | NA    | 0.39  | 8.23E-01 |
|  | <i>TMPRSS6</i> | rs3076475  | T | HOM      | 1065 | -1.967 | 1.301 | -4.516 | 0.582 | -1.51 | 1.31E-01 |
|  | <i>TMPRSS6</i> | rs3076475  | T | HET      | 1065 | -0.093 | 0.580 | -1.229 | 1.042 | -0.16 | 8.72E-01 |
|  | <i>TMPRSS6</i> | rs3076475  | T | GENO_2DF | 1065 | NA     | NA    | NA     | NA    | 2.29  | 3.18E-01 |
|  | <i>TMPRSS6</i> | rs228924   | A | HOM      | 1803 | 1.631  | 1.884 | -2.062 | 5.323 | 0.87  | 3.87E-01 |
|  | <i>TMPRSS6</i> | rs228924   | A | HET      | 1803 | 0.608  | 0.501 | -0.374 | 1.591 | 1.21  | 2.25E-01 |
|  | <i>TMPRSS6</i> | rs228924   | A | GENO_2DF | 1803 | NA     | NA    | NA     | NA    | 2.11  | 3.49E-01 |
|  | <i>TMPRSS6</i> | rs228925   | A | HOM      | 1126 | 1.322  | 1.188 | -1.007 | 3.651 | 1.11  | 2.66E-01 |
|  | <i>TMPRSS6</i> | rs228925   | A | HET      | 1126 | 0.370  | 0.568 | -0.743 | 1.482 | 0.65  | 5.15E-01 |
|  | <i>TMPRSS6</i> | rs228925   | A | GENO_2DF | 1126 | NA     | NA    | NA     | NA    | 1.45  | 4.84E-01 |
|  | <i>TMPRSS6</i> | rs5756520  | A | HOM      | 1799 | -0.306 | 0.602 | -1.486 | 0.873 | -0.51 | 6.11E-01 |
|  | <i>TMPRSS6</i> | rs5756520  | A | HET      | 1799 | 0.056  | 0.461 | -0.848 | 0.960 | 0.12  | 9.03E-01 |
|  | <i>TMPRSS6</i> | rs5756520  | A | GENO_2DF | 1799 | NA     | NA    | NA     | NA    | 0.41  | 8.17E-01 |
|  | <i>TMPRSS6</i> | rs11914132 | T | HOM      | 1804 | 0.026  | 0.862 | -1.663 | 1.714 | 0.03  | 9.76E-01 |
|  | <i>TMPRSS6</i> | rs11914132 | T | HET      | 1804 | -0.182 | 0.444 | -1.053 | 0.688 | -0.41 | 6.81E-01 |
|  | <i>TMPRSS6</i> | rs11914132 | T | GENO_2DF | 1804 | NA     | NA    | NA     | NA    | 0.18  | 9.14E-01 |
|  | <i>TMPRSS6</i> | rs738297   | C | HOM      | 1793 | -1.374 | 1.153 | -3.633 | 0.885 | -1.19 | 2.33E-01 |
|  | <i>TMPRSS6</i> | rs738297   | C | HET      | 1793 | 0.284  | 0.463 | -0.623 | 1.192 | 0.61  | 5.39E-01 |
|  | <i>TMPRSS6</i> | rs738297   | C | GENO_2DF | 1793 | NA     | NA    | NA     | NA    | 2.00  | 3.69E-01 |
|  | <i>TMPRSS6</i> | rs11089823 | C | HOM      | 1796 | 0.079  | 0.862 | -1.610 | 1.769 | 0.09  | 9.27E-01 |
|  | <i>TMPRSS6</i> | rs11089823 | C | HET      | 1796 | -0.171 | 0.445 | -1.043 | 0.702 | -0.38 | 7.01E-01 |
|  | <i>TMPRSS6</i> | rs11089823 | C | GENO_2DF | 1796 | NA     | NA    | NA     | NA    | 0.18  | 9.16E-01 |
|  | <i>TMPRSS6</i> | rs11089824 | C | HOM      | 1796 | 0.079  | 0.862 | -1.610 | 1.769 | 0.09  | 9.27E-01 |
|  | <i>TMPRSS6</i> | rs11089824 | C | HET      | 1796 | -0.171 | 0.445 | -1.043 | 0.702 | -0.38 | 7.01E-01 |
|  | <i>TMPRSS6</i> | rs11089824 | C | GENO_2DF | 1796 | NA     | NA    | NA     | NA    | 0.18  | 9.16E-01 |

**Table S4. HFE and TMPRSS6 single SNP association results for ferritin, iron, TS en TIBC in the total study population conditioned on HFE rs1800562 and TMPRSS6 rs855791.**

| Trait     | Gene | SNP       | A1 | TEST     | NMISS | BETA   | SE    | L95    | U95    | STAT  | P        |
|-----------|------|-----------|----|----------|-------|--------|-------|--------|--------|-------|----------|
| log(ferr) | HFE  | rs9295687 | C  | HOM      | 1763  | -0.012 | 0.026 | -0.064 | 0.040  | -0.45 | 6.54E-01 |
|           | HFE  | rs9295687 | C  | HET      | 1763  | -0.028 | 0.020 | -0.066 | 0.011  | -1.41 | 1.58E-01 |
|           | HFE  | rs9295687 | C  | GENO_2DF | 1763  | NA     | NA    | NA     | NA     | 2.04  | 3.61E-01 |
|           | HFE  | rs4529296 | G  | HOM      | 1763  | -0.012 | 0.026 | -0.064 | 0.040  | -0.45 | 6.54E-01 |
|           | HFE  | rs4529296 | G  | HET      | 1763  | -0.028 | 0.020 | -0.066 | 0.011  | -1.41 | 1.58E-01 |
|           | HFE  | rs4529296 | G  | GENO_2DF | 1763  | NA     | NA    | NA     | NA     | 2.04  | 3.61E-01 |
|           | HFE  | rs9379825 | A  | HOM      | 1763  | -0.012 | 0.026 | -0.064 | 0.040  | -0.45 | 6.54E-01 |
|           | HFE  | rs9379825 | A  | HET      | 1763  | -0.028 | 0.020 | -0.066 | 0.011  | -1.41 | 1.58E-01 |
|           | HFE  | rs9379825 | A  | GENO_2DF | 1763  | NA     | NA    | NA     | NA     | 2.04  | 3.61E-01 |
|           | HFE  | rs9467672 | T  | HOM      | 1763  | -0.012 | 0.026 | -0.064 | 0.040  | -0.45 | 6.54E-01 |
|           | HFE  | rs9467672 | T  | HET      | 1763  | -0.028 | 0.020 | -0.066 | 0.011  | -1.41 | 1.58E-01 |
|           | HFE  | rs9467672 | T  | GENO_2DF | 1763  | NA     | NA    | NA     | NA     | 2.04  | 3.61E-01 |
|           | HFE  | rs9295688 | A  | HOM      | 1762  | -0.013 | 0.026 | -0.065 | 0.039  | -0.49 | 6.26E-01 |
|           | HFE  | rs9295688 | A  | HET      | 1762  | -0.028 | 0.020 | -0.066 | 0.011  | -1.41 | 1.57E-01 |
|           | HFE  | rs9295688 | A  | GENO_2DF | 1762  | NA     | NA    | NA     | NA     | 2.03  | 3.62E-01 |
|           | HFE  | rs2006736 | T  | HOM      | 1762  | -0.013 | 0.026 | -0.065 | 0.039  | -0.49 | 6.26E-01 |
|           | HFE  | rs2006736 | T  | HET      | 1762  | -0.028 | 0.020 | -0.066 | 0.011  | -1.41 | 1.57E-01 |
|           | HFE  | rs2006736 | T  | GENO_2DF | 1762  | NA     | NA    | NA     | NA     | 2.03  | 3.62E-01 |
|           | HFE  | rs1800702 | G  | HOM      | 1762  | -0.013 | 0.026 | -0.065 | 0.039  | -0.49 | 6.26E-01 |
|           | HFE  | rs1800702 | G  | HET      | 1762  | -0.028 | 0.020 | -0.066 | 0.011  | -1.41 | 1.57E-01 |
|           | HFE  | rs1800702 | G  | GENO_2DF | 1762  | NA     | NA    | NA     | NA     | 2.03  | 3.62E-01 |
|           | HFE  | rs2794720 | C  | HOM      | 1762  | -0.013 | 0.026 | -0.065 | 0.039  | -0.49 | 6.26E-01 |
|           | HFE  | rs2794720 | C  | HET      | 1762  | -0.028 | 0.020 | -0.066 | 0.011  | -1.41 | 1.57E-01 |
|           | HFE  | rs2794720 | C  | GENO_2DF | 1762  | NA     | NA    | NA     | NA     | 2.03  | 3.62E-01 |
|           | HFE  | rs2794719 | G  | HOM      | 1762  | -0.013 | 0.026 | -0.065 | 0.039  | -0.49 | 6.26E-01 |
|           | HFE  | rs2794719 | G  | HET      | 1762  | -0.028 | 0.020 | -0.066 | 0.011  | -1.41 | 1.57E-01 |
|           | HFE  | rs2794719 | G  | GENO_2DF | 1762  | NA     | NA    | NA     | NA     | 2.03  | 3.62E-01 |
|           | HFE  | rs9366637 | T  | HOM      | 1822  | -0.061 | 0.137 | -0.330 | 0.208  | -0.45 | 6.55E-01 |
|           | HFE  | rs9366637 | T  | HET      | 1822  | -0.069 | 0.028 | -0.124 | -0.015 | -2.50 | 1.24E-02 |

|  |     |            |   |          |      |        |       |        |        |       |          |
|--|-----|------------|---|----------|------|--------|-------|--------|--------|-------|----------|
|  | HFE | rs9366637  | T | GENO_2DF | 1822 | NA     | NA    | NA     | NA     | 6.42  | 4.04E-02 |
|  | HFE | rs1799945  | G | HOM      | 1773 | 0.070  | 0.050 | -0.028 | 0.168  | 1.41  | 1.59E-01 |
|  | HFE | rs1799945  | G | HET      | 1773 | 0.028  | 0.020 | -0.012 | 0.068  | 1.36  | 1.73E-01 |
|  | HFE | rs1799945  | G | GENO_2DF | 1773 | NA     | NA    | NA     | NA     | 3.47  | 1.76E-01 |
|  | HFE | rs2071303  | C | HOM      | 1822 | 0.017  | 0.028 | -0.037 | 0.072  | 0.62  | 5.34E-01 |
|  | HFE | rs2071303  | C | HET      | 1822 | 0.017  | 0.018 | -0.019 | 0.053  | 0.91  | 3.61E-01 |
|  | HFE | rs2071303  | C | GENO_2DF | 1822 | NA     | NA    | NA     | NA     | 0.94  | 6.26E-01 |
|  | HFE | rs1800562  | A | HOM      | 1822 | NA     | NA    | NA     | NA     | NA    | NA       |
|  | HFE | rs1800562  | A | HET      | 1822 | NA     | NA    | NA     | NA     | NA    | NA       |
|  | HFE | rs1800562  | A | GENO_2DF | 1822 | NA     | NA    | NA     | NA     | NA    | NA       |
|  | HFE | rs1800708  | C | HOM      | 1821 | -0.064 | 0.148 | -0.354 | 0.227  | -0.43 | 6.67E-01 |
|  | HFE | rs1800708  | C | HET      | 1821 | -0.066 | 0.027 | -0.119 | -0.012 | -2.41 | 1.59E-02 |
|  | HFE | rs1800708  | C | GENO_2DF | 1821 | NA     | NA    | NA     | NA     | 5.97  | 5.06E-02 |
|  | HFE | rs2858996  | T | HOM      | 1821 | -0.013 | 0.050 | -0.110 | 0.085  | -0.26 | 7.97E-01 |
|  | HFE | rs2858996  | T | HET      | 1821 | -0.029 | 0.020 | -0.068 | 0.011  | -1.42 | 1.55E-01 |
|  | HFE | rs2858996  | T | GENO_2DF | 1821 | NA     | NA    | NA     | NA     | 2.04  | 3.61E-01 |
|  | HFE | rs1572982  | A | HOM      | 1822 | 0.003  | 0.025 | -0.046 | 0.053  | 0.14  | 8.93E-01 |
|  | HFE | rs1572982  | A | HET      | 1822 | 0.013  | 0.020 | -0.026 | 0.053  | 0.67  | 5.05E-01 |
|  | HFE | rs1572982  | A | GENO_2DF | 1822 | NA     | NA    | NA     | NA     | 0.51  | 7.74E-01 |
|  | HFE | rs707889   | A | HOM      | 1822 | -0.012 | 0.050 | -0.110 | 0.085  | -0.24 | 8.08E-01 |
|  | HFE | rs707889   | A | HET      | 1822 | -0.029 | 0.020 | -0.068 | 0.011  | -1.43 | 1.54E-01 |
|  | HFE | rs707889   | A | GENO_2DF | 1822 | NA     | NA    | NA     | NA     | 2.05  | 3.60E-01 |
|  | HFE | rs1045537  | C | HOM      | 1771 | -0.076 | 0.064 | -0.201 | 0.049  | -1.19 | 2.33E-01 |
|  | HFE | rs1045537  | C | HET      | 1771 | 0.029  | 0.021 | -0.012 | 0.070  | 1.40  | 1.63E-01 |
|  | HFE | rs1045537  | C | GENO_2DF | 1771 | NA     | NA    | NA     | NA     | 3.65  | 1.61E-01 |
|  | HFE | rs12346    | T | HOM      | 1822 | 0.012  | 0.029 | -0.045 | 0.070  | 0.42  | 6.72E-01 |
|  | HFE | rs12346    | T | HET      | 1822 | 0.013  | 0.018 | -0.023 | 0.048  | 0.71  | 4.77E-01 |
|  | HFE | rs12346    | T | GENO_2DF | 1822 | NA     | NA    | NA     | NA     | 0.55  | 7.60E-01 |
|  | HFE | rs17596719 | A | HOM      | 1820 | 0.073  | 0.082 | -0.087 | 0.233  | 0.90  | 3.70E-01 |
|  | HFE | rs17596719 | A | HET      | 1820 | -0.032 | 0.021 | -0.074 | 0.010  | -1.50 | 1.33E-01 |
|  | HFE | rs17596719 | A | GENO_2DF | 1820 | NA     | NA    | NA     | NA     | 3.23  | 1.99E-01 |
|  | HFE | rs6918586  | C | HOM      | 1819 | 0.030  | 0.026 | -0.021 | 0.081  | 1.14  | 2.53E-01 |
|  | HFE | rs6918586  | C | HET      | 1819 | 0.032  | 0.019 | -0.006 | 0.069  | 1.66  | 9.64E-02 |



|  |     |           |   |          |      |        |       |        |       |       |          |
|--|-----|-----------|---|----------|------|--------|-------|--------|-------|-------|----------|
|  | HFE | rs6918586 | C | GENO_2DF | 1819 | NA     | NA    | NA     | NA    | 2.97  | 2.26E-01 |
|  | HFE | rs9393685 | C | HOM      | 1815 | -0.062 | 0.148 | -0.352 | 0.229 | -0.42 | 6.78E-01 |
|  | HFE | rs9393685 | C | HET      | 1815 | -0.052 | 0.027 | -0.104 | 0.001 | -1.94 | 5.29E-02 |
|  | HFE | rs9393685 | C | GENO_2DF | 1815 | NA     | NA    | NA     | NA    | 3.89  | 1.43E-01 |
|  | HFE | rs1150659 | A | HOM      | 1820 | -0.014 | 0.049 | -0.111 | 0.083 | -0.28 | 7.77E-01 |
|  | HFE | rs1150659 | A | HET      | 1820 | -0.029 | 0.020 | -0.069 | 0.010 | -1.45 | 1.47E-01 |
|  | HFE | rs1150659 | A | GENO_2DF | 1820 | NA     | NA    | NA     | NA    | 2.11  | 3.48E-01 |
|  | HFE | rs1150660 | A | HOM      | 1822 | 0.012  | 0.029 | -0.045 | 0.070 | 0.42  | 6.72E-01 |
|  | HFE | rs1150660 | A | HET      | 1822 | 0.013  | 0.018 | -0.023 | 0.048 | 0.71  | 4.77E-01 |
|  | HFE | rs1150660 | A | GENO_2DF | 1822 | NA     | NA    | NA     | NA    | 0.55  | 7.60E-01 |
|  | HFE | rs198857  | G | HOM      | 1820 | 0.004  | 0.025 | -0.046 | 0.054 | 0.16  | 8.74E-01 |
|  | HFE | rs198857  | G | HET      | 1820 | 0.014  | 0.020 | -0.025 | 0.054 | 0.70  | 4.87E-01 |
|  | HFE | rs198857  | G | GENO_2DF | 1820 | NA     | NA    | NA     | NA    | 0.55  | 7.60E-01 |
|  | HFE | rs198856  | G | HOM      | 1820 | 0.004  | 0.025 | -0.046 | 0.054 | 0.16  | 8.74E-01 |
|  | HFE | rs198856  | G | HET      | 1820 | 0.014  | 0.020 | -0.025 | 0.054 | 0.70  | 4.87E-01 |
|  | HFE | rs198856  | G | GENO_2DF | 1820 | NA     | NA    | NA     | NA    | 0.55  | 7.60E-01 |
|  | HFE | rs1543680 | A | HOM      | 1816 | -0.022 | 0.050 | -0.120 | 0.075 | -0.45 | 6.54E-01 |
|  | HFE | rs1543680 | A | HET      | 1816 | -0.031 | 0.020 | -0.071 | 0.008 | -1.54 | 1.23E-01 |
|  | HFE | rs1543680 | A | GENO_2DF | 1816 | NA     | NA    | NA     | NA    | 2.38  | 3.04E-01 |
|  | HFE | rs198855  | A | HOM      | 1773 | 0.029  | 0.034 | -0.037 | 0.095 | 0.86  | 3.92E-01 |
|  | HFE | rs198855  | A | HET      | 1773 | 0.010  | 0.018 | -0.026 | 0.046 | 0.56  | 5.77E-01 |
|  | HFE | rs198855  | A | GENO_2DF | 1773 | NA     | NA    | NA     | NA    | 0.87  | 6.47E-01 |
|  | HFE | rs7743957 | C | HOM      | 1815 | -0.062 | 0.148 | -0.352 | 0.229 | -0.42 | 6.78E-01 |
|  | HFE | rs7743957 | C | HET      | 1815 | -0.052 | 0.027 | -0.104 | 0.001 | -1.94 | 5.29E-02 |
|  | HFE | rs7743957 | C | GENO_2DF | 1815 | NA     | NA    | NA     | NA    | 3.89  | 1.43E-01 |
|  | HFE | rs198854  | T | HOM      | 1821 | 0.004  | 0.025 | -0.045 | 0.054 | 0.17  | 8.67E-01 |
|  | HFE | rs198854  | T | HET      | 1821 | 0.014  | 0.020 | -0.025 | 0.054 | 0.70  | 4.87E-01 |
|  | HFE | rs198854  | T | GENO_2DF | 1821 | NA     | NA    | NA     | NA    | 0.54  | 7.62E-01 |
|  | HFE | rs198853  | C | HOM      | 1822 | 0.012  | 0.029 | -0.045 | 0.070 | 0.42  | 6.72E-01 |
|  | HFE | rs198853  | C | HET      | 1822 | 0.013  | 0.018 | -0.023 | 0.048 | 0.71  | 4.77E-01 |
|  | HFE | rs198853  | C | GENO_2DF | 1822 | NA     | NA    | NA     | NA    | 0.55  | 7.60E-01 |
|  | HFE | rs2229768 | C | HOM      | 1821 | -0.014 | 0.049 | -0.111 | 0.083 | -0.28 | 7.76E-01 |
|  | HFE | rs2229768 | C | HET      | 1821 | -0.029 | 0.020 | -0.069 | 0.010 | -1.45 | 1.46E-01 |

|  |         |            |   |          |      |        |       |        |       |       |          |
|--|---------|------------|---|----------|------|--------|-------|--------|-------|-------|----------|
|  | HFE     | rs2229768  | C | GENO_2DF | 1821 | NA     | NA    | NA     | NA    | 2.12  | 3.47E-01 |
|  | HFE     | rs198852   | G | HOM      | 1822 | 0.017  | 0.027 | -0.036 | 0.070 | 0.64  | 5.23E-01 |
|  | HFE     | rs198852   | G | HET      | 1822 | 0.006  | 0.019 | -0.032 | 0.043 | 0.30  | 7.65E-01 |
|  | HFE     | rs198852   | G | GENO_2DF | 1822 | NA     | NA    | NA     | NA    | 0.41  | 8.15E-01 |
|  | HFE     | rs198851   | T | HOM      | 1662 | 0.081  | 0.057 | -0.031 | 0.194 | 1.42  | 1.57E-01 |
|  | HFE     | rs198851   | T | HET      | 1662 | 0.029  | 0.022 | -0.014 | 0.071 | 1.31  | 1.91E-01 |
|  | HFE     | rs198851   | T | GENO_2DF | 1662 | NA     | NA    | NA     | NA    | 3.41  | 1.82E-01 |
|  | HFE     | rs198848   | T | HOM      | 1822 | 0.017  | 0.027 | -0.036 | 0.070 | 0.64  | 5.23E-01 |
|  | HFE     | rs198848   | T | HET      | 1822 | 0.006  | 0.019 | -0.032 | 0.043 | 0.30  | 7.65E-01 |
|  | HFE     | rs198848   | T | GENO_2DF | 1822 | NA     | NA    | NA     | NA    | 0.41  | 8.15E-01 |
|  | TMPRSS6 | rs2235320  | T | HOM      | 1821 | -0.118 | 0.072 | -0.259 | 0.023 | -1.64 | 1.02E-01 |
|  | TMPRSS6 | rs2235320  | T | HET      | 1821 | 0.043  | 0.021 | 0.001  | 0.085 | 2.02  | 4.38E-02 |
|  | TMPRSS6 | rs2235320  | T | GENO_2DF | 1821 | NA     | NA    | NA     | NA    | 7.60  | 2.24E-02 |
|  | TMPRSS6 | rs2235321  | A | HOM      | 1577 | -0.014 | 0.041 | -0.095 | 0.067 | -0.35 | 7.30E-01 |
|  | TMPRSS6 | rs2235321  | A | HET      | 1577 | 0.000  | 0.025 | -0.050 | 0.049 | -0.01 | 9.89E-01 |
|  | TMPRSS6 | rs2235321  | A | GENO_2DF | 1577 | NA     | NA    | NA     | NA    | 0.15  | 9.26E-01 |
|  | TMPRSS6 | rs855791   | A | HOM      | 1822 | NA     | NA    | NA     | NA    | NA    | NA       |
|  | TMPRSS6 | rs855791   | A | HET      | 1822 | NA     | NA    | NA     | NA    | NA    | NA       |
|  | TMPRSS6 | rs855791   | A | GENO_2DF | 1822 | NA     | NA    | NA     | NA    | NA    | NA       |
|  | TMPRSS6 | rs5756504  | T | HOM      | 1621 | -0.024 | 0.040 | -0.103 | 0.054 | -0.61 | 5.45E-01 |
|  | TMPRSS6 | rs5756504  | T | HET      | 1621 | -0.007 | 0.024 | -0.054 | 0.040 | -0.29 | 7.69E-01 |
|  | TMPRSS6 | rs5756504  | T | GENO_2DF | 1621 | NA     | NA    | NA     | NA    | 0.37  | 8.33E-01 |
|  | TMPRSS6 | rs5756505  | C | HOM      | 1665 | -0.027 | 0.039 | -0.105 | 0.050 | -0.69 | 4.88E-01 |
|  | TMPRSS6 | rs5756505  | C | HET      | 1665 | -0.004 | 0.025 | -0.053 | 0.045 | -0.16 | 8.76E-01 |
|  | TMPRSS6 | rs5756505  | C | GENO_2DF | 1665 | NA     | NA    | NA     | NA    | 0.55  | 7.60E-01 |
|  | TMPRSS6 | rs5756506  | C | HOM      | 1653 | -0.031 | 0.039 | -0.108 | 0.046 | -0.79 | 4.27E-01 |
|  | TMPRSS6 | rs5756506  | C | HET      | 1653 | -0.009 | 0.024 | -0.055 | 0.038 | -0.37 | 7.12E-01 |
|  | TMPRSS6 | rs5756506  | C | GENO_2DF | 1653 | NA     | NA    | NA     | NA    | 0.63  | 7.29E-01 |
|  | TMPRSS6 | rs4820268  | G | HOM      | 1817 | 0.011  | 0.059 | -0.105 | 0.128 | 0.19  | 8.50E-01 |
|  | TMPRSS6 | rs4820268  | G | HET      | 1817 | 0.041  | 0.043 | -0.043 | 0.124 | 0.96  | 3.38E-01 |
|  | TMPRSS6 | rs4820268  | G | GENO_2DF | 1817 | NA     | NA    | NA     | NA    | 1.33  | 5.13E-01 |
|  | TMPRSS6 | rs13055107 | A | HOM      | 1621 | 0.018  | 0.079 | -0.136 | 0.172 | 0.23  | 8.19E-01 |
|  | TMPRSS6 | rs13055107 | A | HET      | 1621 | -0.008 | 0.024 | -0.054 | 0.038 | -0.34 | 7.33E-01 |

|  |                |            |   |          |      |        |       |        |       |       |          |
|--|----------------|------------|---|----------|------|--------|-------|--------|-------|-------|----------|
|  | <i>TMPRSS6</i> | rs13055107 | A | GENO_2DF | 1621 | NA     | NA    | NA     | NA    | 0.19  | 9.11E-01 |
|  | <i>TMPRSS6</i> | rs2413450  | T | HOM      | 1735 | 0.032  | 0.062 | -0.089 | 0.153 | 0.51  | 6.09E-01 |
|  | <i>TMPRSS6</i> | rs2413450  | T | HET      | 1735 | 0.038  | 0.044 | -0.047 | 0.124 | 0.88  | 3.79E-01 |
|  | <i>TMPRSS6</i> | rs2413450  | T | GENO_2DF | 1735 | NA     | NA    | NA     | NA    | 0.79  | 6.74E-01 |
|  | <i>TMPRSS6</i> | rs855789   | C | HOM      | 1817 | 0.240  | 0.258 | -0.266 | 0.746 | 0.93  | 3.54E-01 |
|  | <i>TMPRSS6</i> | rs855789   | C | HET      | 1817 | -0.016 | 0.030 | -0.074 | 0.042 | -0.53 | 5.95E-01 |
|  | <i>TMPRSS6</i> | rs855789   | C | GENO_2DF | 1817 | NA     | NA    | NA     | NA    | 1.16  | 5.59E-01 |
|  | <i>TMPRSS6</i> | rs855788   | A | HOM      | 1821 | -0.018 | 0.030 | -0.077 | 0.041 | -0.60 | 5.48E-01 |
|  | <i>TMPRSS6</i> | rs855788   | A | HET      | 1821 | -0.008 | 0.020 | -0.047 | 0.031 | -0.39 | 6.98E-01 |
|  | <i>TMPRSS6</i> | rs855788   | A | GENO_2DF | 1821 | NA     | NA    | NA     | NA    | 0.38  | 8.29E-01 |
|  | <i>TMPRSS6</i> | rs17750017 | A | HOM      | 1807 | NA     | NA    | NA     | NA    | NA    | NA       |
|  | <i>TMPRSS6</i> | rs17750017 | A | HET      | 1807 | NA     | NA    | NA     | NA    | NA    | NA       |
|  | <i>TMPRSS6</i> | rs17750017 | A | GENO_2DF | 1807 | NA     | NA    | NA     | NA    | NA    | NA       |
|  | <i>TMPRSS6</i> | rs2743820  | C | HOM      | 1591 | 0.001  | 0.032 | -0.062 | 0.064 | 0.03  | 9.76E-01 |
|  | <i>TMPRSS6</i> | rs2743820  | C | HET      | 1591 | -0.009 | 0.020 | -0.049 | 0.031 | -0.42 | 6.72E-01 |
|  | <i>TMPRSS6</i> | rs2743820  | C | GENO_2DF | 1591 | NA     | NA    | NA     | NA    | 0.23  | 8.92E-01 |
|  | <i>TMPRSS6</i> | rs1005478  | A | HOM      | 1551 | -0.024 | 0.029 | -0.081 | 0.033 | -0.82 | 4.14E-01 |
|  | <i>TMPRSS6</i> | rs1005478  | A | HET      | 1551 | 0.000  | 0.020 | -0.039 | 0.039 | -0.01 | 9.93E-01 |
|  | <i>TMPRSS6</i> | rs1005478  | A | GENO_2DF | 1551 | NA     | NA    | NA     | NA    | 0.76  | 6.84E-01 |
|  | <i>TMPRSS6</i> | rs7286184  | G | HOM      | 1562 | -0.009 | 0.045 | -0.097 | 0.078 | -0.21 | 8.35E-01 |
|  | <i>TMPRSS6</i> | rs7286184  | G | HET      | 1562 | 0.006  | 0.021 | -0.036 | 0.047 | 0.27  | 7.88E-01 |
|  | <i>TMPRSS6</i> | rs7286184  | G | GENO_2DF | 1562 | NA     | NA    | NA     | NA    | 0.15  | 9.27E-01 |
|  | <i>TMPRSS6</i> | rs2246092  | G | HOM      | 1550 | -0.023 | 0.029 | -0.079 | 0.034 | -0.78 | 4.35E-01 |
|  | <i>TMPRSS6</i> | rs2246092  | G | HET      | 1550 | -0.003 | 0.020 | -0.043 | 0.036 | -0.17 | 8.63E-01 |
|  | <i>TMPRSS6</i> | rs2246092  | G | GENO_2DF | 1550 | NA     | NA    | NA     | NA    | 0.63  | 7.31E-01 |
|  | <i>TMPRSS6</i> | rs2543519  | G | HOM      | 1576 | 0.036  | 0.039 | -0.040 | 0.113 | 0.93  | 3.51E-01 |
|  | <i>TMPRSS6</i> | rs2543519  | G | HET      | 1576 | -0.007 | 0.020 | -0.047 | 0.033 | -0.34 | 7.36E-01 |
|  | <i>TMPRSS6</i> | rs2543519  | G | GENO_2DF | 1576 | NA     | NA    | NA     | NA    | 1.24  | 5.39E-01 |
|  | <i>TMPRSS6</i> | rs2111833  | T | HOM      | 1614 | -0.004 | 0.032 | -0.066 | 0.059 | -0.12 | 9.08E-01 |
|  | <i>TMPRSS6</i> | rs2111833  | T | HET      | 1614 | -0.018 | 0.020 | -0.057 | 0.022 | -0.88 | 3.78E-01 |
|  | <i>TMPRSS6</i> | rs2111833  | T | GENO_2DF | 1614 | NA     | NA    | NA     | NA    | 0.85  | 6.55E-01 |
|  | <i>TMPRSS6</i> | rs2179229  | G | HOM      | 1566 | -0.014 | 0.029 | -0.071 | 0.042 | -0.50 | 6.20E-01 |
|  | <i>TMPRSS6</i> | rs2179229  | G | HET      | 1566 | -0.002 | 0.020 | -0.041 | 0.037 | -0.12 | 9.08E-01 |

|  |                |           |   |          |      |        |       |        |       |       |          |
|--|----------------|-----------|---|----------|------|--------|-------|--------|-------|-------|----------|
|  | <i>TMPRSS6</i> | rs2179229 | G | GENO_2DF | 1566 | NA     | NA    | NA     | NA    | 0.25  | 8.82E-01 |
|  | <i>TMPRSS6</i> | rs2235323 | C | HOM      | 1819 | 0.006  | 0.029 | -0.050 | 0.063 | 0.21  | 8.32E-01 |
|  | <i>TMPRSS6</i> | rs2235323 | C | HET      | 1819 | -0.016 | 0.019 | -0.054 | 0.021 | -0.85 | 3.93E-01 |
|  | <i>TMPRSS6</i> | rs2235323 | C | GENO_2DF | 1819 | NA     | NA    | NA     | NA    | 1.13  | 5.69E-01 |
|  | <i>TMPRSS6</i> | rs2235324 | C | HOM      | 1821 | 0.006  | 0.029 | -0.050 | 0.063 | 0.22  | 8.29E-01 |
|  | <i>TMPRSS6</i> | rs2235324 | C | HET      | 1821 | -0.016 | 0.019 | -0.054 | 0.021 | -0.86 | 3.89E-01 |
|  | <i>TMPRSS6</i> | rs2235324 | C | GENO_2DF | 1821 | NA     | NA    | NA     | NA    | 1.15  | 5.62E-01 |
|  | <i>TMPRSS6</i> | rs736852  | C | HOM      | 1807 | 0.004  | 0.028 | -0.051 | 0.060 | 0.16  | 8.76E-01 |
|  | <i>TMPRSS6</i> | rs736852  | C | HET      | 1807 | -0.008 | 0.020 | -0.046 | 0.031 | -0.39 | 6.97E-01 |
|  | <i>TMPRSS6</i> | rs736852  | C | GENO_2DF | 1807 | NA     | NA    | NA     | NA    | 0.30  | 8.62E-01 |
|  | <i>TMPRSS6</i> | rs2019848 | A | HOM      | 1757 | 0.015  | 0.042 | -0.067 | 0.097 | 0.35  | 7.24E-01 |
|  | <i>TMPRSS6</i> | rs2019848 | A | HET      | 1757 | -0.004 | 0.020 | -0.044 | 0.035 | -0.21 | 8.36E-01 |
|  | <i>TMPRSS6</i> | rs2019848 | A | GENO_2DF | 1757 | NA     | NA    | NA     | NA    | 0.22  | 8.97E-01 |
|  | <i>TMPRSS6</i> | rs1421312 | G | HOM      | 1821 | 0.006  | 0.029 | -0.050 | 0.062 | 0.20  | 8.43E-01 |
|  | <i>TMPRSS6</i> | rs1421312 | G | HET      | 1821 | -0.014 | 0.019 | -0.052 | 0.023 | -0.75 | 4.52E-01 |
|  | <i>TMPRSS6</i> | rs1421312 | G | GENO_2DF | 1821 | NA     | NA    | NA     | NA    | 0.90  | 6.38E-01 |
|  | <i>TMPRSS6</i> | rs2543514 | C | HOM      | 1812 | 0.005  | 0.028 | -0.051 | 0.060 | 0.17  | 8.64E-01 |
|  | <i>TMPRSS6</i> | rs2543514 | C | HET      | 1812 | -0.008 | 0.020 | -0.046 | 0.031 | -0.39 | 6.99E-01 |
|  | <i>TMPRSS6</i> | rs2543514 | C | GENO_2DF | 1812 | NA     | NA    | NA     | NA    | 0.31  | 8.58E-01 |
|  | <i>TMPRSS6</i> | rs2543513 | G | HOM      | 1812 | 0.005  | 0.028 | -0.051 | 0.060 | 0.17  | 8.64E-01 |
|  | <i>TMPRSS6</i> | rs2543513 | G | HET      | 1812 | -0.008 | 0.020 | -0.046 | 0.031 | -0.39 | 6.99E-01 |
|  | <i>TMPRSS6</i> | rs2543513 | G | GENO_2DF | 1812 | NA     | NA    | NA     | NA    | 0.31  | 8.58E-01 |
|  | <i>TMPRSS6</i> | rs2413451 | G | HOM      | 1812 | 0.005  | 0.028 | -0.051 | 0.060 | 0.17  | 8.64E-01 |
|  | <i>TMPRSS6</i> | rs2413451 | G | HET      | 1812 | -0.008 | 0.020 | -0.046 | 0.031 | -0.39 | 6.99E-01 |
|  | <i>TMPRSS6</i> | rs2413451 | G | GENO_2DF | 1812 | NA     | NA    | NA     | NA    | 0.31  | 8.58E-01 |
|  | <i>TMPRSS6</i> | rs2251655 | T | HOM      | 1812 | 0.005  | 0.028 | -0.051 | 0.060 | 0.17  | 8.64E-01 |
|  | <i>TMPRSS6</i> | rs2251655 | T | HET      | 1812 | -0.008 | 0.020 | -0.046 | 0.031 | -0.39 | 6.99E-01 |
|  | <i>TMPRSS6</i> | rs2251655 | T | GENO_2DF | 1812 | NA     | NA    | NA     | NA    | 0.31  | 8.58E-01 |
|  | <i>TMPRSS6</i> | rs2743824 | C | HOM      | 1810 | 0.005  | 0.028 | -0.051 | 0.060 | 0.17  | 8.63E-01 |
|  | <i>TMPRSS6</i> | rs2743824 | C | HET      | 1810 | -0.008 | 0.020 | -0.046 | 0.031 | -0.40 | 6.90E-01 |
|  | <i>TMPRSS6</i> | rs2743824 | C | GENO_2DF | 1810 | NA     | NA    | NA     | NA    | 0.32  | 8.51E-01 |
|  | <i>TMPRSS6</i> | rs2543509 | G | HOM      | 1810 | 0.005  | 0.028 | -0.051 | 0.060 | 0.17  | 8.63E-01 |
|  | <i>TMPRSS6</i> | rs2543509 | G | HET      | 1810 | -0.008 | 0.020 | -0.046 | 0.031 | -0.40 | 6.90E-01 |

|  |                |           |   |          |      |        |       |        |       |       |          |
|--|----------------|-----------|---|----------|------|--------|-------|--------|-------|-------|----------|
|  | <i>TMPRSS6</i> | rs2543509 | G | GENO_2DF | 1810 | NA     | NA    | NA     | NA    | 0.32  | 8.51E-01 |
|  | <i>TMPRSS6</i> | rs2743825 | G | HOM      | 1809 | 0.005  | 0.028 | -0.051 | 0.060 | 0.17  | 8.64E-01 |
|  | <i>TMPRSS6</i> | rs2743825 | G | HET      | 1809 | -0.008 | 0.020 | -0.047 | 0.031 | -0.41 | 6.83E-01 |
|  | <i>TMPRSS6</i> | rs2743825 | G | GENO_2DF | 1809 | NA     | NA    | NA     | NA    | 0.33  | 8.47E-01 |
|  | <i>TMPRSS6</i> | rs2160906 | A | HOM      | 1821 | 0.024  | 0.038 | -0.051 | 0.099 | 0.63  | 5.26E-01 |
|  | <i>TMPRSS6</i> | rs2160906 | A | HET      | 1821 | -0.007 | 0.019 | -0.044 | 0.031 | -0.34 | 7.34E-01 |
|  | <i>TMPRSS6</i> | rs2160906 | A | GENO_2DF | 1821 | NA     | NA    | NA     | NA    | 0.67  | 7.16E-01 |
|  | <i>TMPRSS6</i> | rs732755  | C | HOM      | 1745 | 0.022  | 0.038 | -0.053 | 0.097 | 0.57  | 5.70E-01 |
|  | <i>TMPRSS6</i> | rs732755  | C | HET      | 1745 | -0.011 | 0.020 | -0.050 | 0.027 | -0.57 | 5.69E-01 |
|  | <i>TMPRSS6</i> | rs732755  | C | GENO_2DF | 1745 | NA     | NA    | NA     | NA    | 0.88  | 6.46E-01 |
|  | <i>TMPRSS6</i> | rs8139988 | C | HOM      | 1798 | 0.029  | 0.039 | -0.047 | 0.104 | 0.75  | 4.55E-01 |
|  | <i>TMPRSS6</i> | rs8139988 | C | HET      | 1798 | -0.005 | 0.019 | -0.043 | 0.033 | -0.25 | 8.01E-01 |
|  | <i>TMPRSS6</i> | rs8139988 | C | GENO_2DF | 1798 | NA     | NA    | NA     | NA    | 0.77  | 6.82E-01 |
|  | <i>TMPRSS6</i> | rs2017764 | A | HOM      | 1789 | 0.003  | 0.029 | -0.055 | 0.060 | 0.09  | 9.31E-01 |
|  | <i>TMPRSS6</i> | rs2017764 | A | HET      | 1789 | -0.016 | 0.019 | -0.054 | 0.022 | -0.84 | 4.04E-01 |
|  | <i>TMPRSS6</i> | rs2017764 | A | GENO_2DF | 1789 | NA     | NA    | NA     | NA    | 0.93  | 6.27E-01 |
|  | <i>TMPRSS6</i> | rs733655  | C | HOM      | 1791 | 0.037  | 0.036 | -0.033 | 0.107 | 1.04  | 2.97E-01 |
|  | <i>TMPRSS6</i> | rs733655  | C | HET      | 1791 | -0.012 | 0.019 | -0.050 | 0.025 | -0.65 | 5.18E-01 |
|  | <i>TMPRSS6</i> | rs733655  | C | GENO_2DF | 1791 | NA     | NA    | NA     | NA    | 2.01  | 3.66E-01 |
|  | <i>TMPRSS6</i> | rs2281090 | A | HOM      | 1793 | 0.024  | 0.039 | -0.052 | 0.100 | 0.62  | 5.39E-01 |
|  | <i>TMPRSS6</i> | rs2281090 | A | HET      | 1793 | -0.005 | 0.019 | -0.043 | 0.033 | -0.25 | 8.01E-01 |
|  | <i>TMPRSS6</i> | rs2281090 | A | GENO_2DF | 1793 | NA     | NA    | NA     | NA    | 0.55  | 7.58E-01 |
|  | <i>TMPRSS6</i> | rs2281091 | T | HOM      | 1791 | 0.028  | 0.039 | -0.049 | 0.105 | 0.71  | 4.76E-01 |
|  | <i>TMPRSS6</i> | rs2281091 | T | HET      | 1791 | -0.005 | 0.019 | -0.043 | 0.034 | -0.24 | 8.13E-01 |
|  | <i>TMPRSS6</i> | rs2281091 | T | GENO_2DF | 1791 | NA     | NA    | NA     | NA    | 0.69  | 7.08E-01 |
|  | <i>TMPRSS6</i> | rs228906  | A | HOM      | 1822 | -0.003 | 0.027 | -0.056 | 0.050 | -0.11 | 9.13E-01 |
|  | <i>TMPRSS6</i> | rs228906  | A | HET      | 1822 | -0.011 | 0.018 | -0.047 | 0.025 | -0.59 | 5.57E-01 |
|  | <i>TMPRSS6</i> | rs228906  | A | GENO_2DF | 1822 | NA     | NA    | NA     | NA    | 0.36  | 8.36E-01 |
|  | <i>TMPRSS6</i> | rs7289616 | A | HOM      | 1767 | 0.011  | 0.030 | -0.047 | 0.069 | 0.36  | 7.20E-01 |
|  | <i>TMPRSS6</i> | rs7289616 | A | HET      | 1767 | -0.015 | 0.019 | -0.053 | 0.023 | -0.76 | 4.46E-01 |
|  | <i>TMPRSS6</i> | rs7289616 | A | GENO_2DF | 1767 | NA     | NA    | NA     | NA    | 1.14  | 5.65E-01 |
|  | <i>TMPRSS6</i> | rs9619658 | T | HOM      | 1459 | 0.012  | 0.035 | -0.056 | 0.081 | 0.35  | 7.23E-01 |
|  | <i>TMPRSS6</i> | rs9619658 | T | HET      | 1459 | -0.015 | 0.021 | -0.056 | 0.026 | -0.72 | 4.71E-01 |

|  |                |            |   |          |      |        |       |        |       |       |          |
|--|----------------|------------|---|----------|------|--------|-------|--------|-------|-------|----------|
|  | <i>TMPRSS6</i> | rs9619658  | T | GENO_2DF | 1459 | NA     | NA    | NA     | NA    | 0.94  | 6.26E-01 |
|  | <i>TMPRSS6</i> | rs228907   | A | HOM      | 1819 | -0.017 | 0.032 | -0.080 | 0.046 | -0.52 | 6.06E-01 |
|  | <i>TMPRSS6</i> | rs228907   | A | HET      | 1819 | -0.005 | 0.018 | -0.041 | 0.030 | -0.29 | 7.70E-01 |
|  | <i>TMPRSS6</i> | rs228907   | A | GENO_2DF | 1819 | NA     | NA    | NA     | NA    | 0.30  | 8.62E-01 |
|  | <i>TMPRSS6</i> | rs17750152 | T | HOM      | 1079 | 0.045  | 0.055 | -0.063 | 0.154 | 0.82  | 4.11E-01 |
|  | <i>TMPRSS6</i> | rs17750152 | T | HET      | 1079 | 0.008  | 0.026 | -0.042 | 0.058 | 0.30  | 7.64E-01 |
|  | <i>TMPRSS6</i> | rs17750152 | T | GENO_2DF | 1079 | NA     | NA    | NA     | NA    | 0.69  | 7.08E-01 |
|  | <i>TMPRSS6</i> | rs4140590  | A | HOM      | 1586 | -0.026 | 0.028 | -0.081 | 0.029 | -0.92 | 3.58E-01 |
|  | <i>TMPRSS6</i> | rs4140590  | A | HET      | 1586 | -0.009 | 0.021 | -0.051 | 0.033 | -0.43 | 6.70E-01 |
|  | <i>TMPRSS6</i> | rs4140590  | A | GENO_2DF | 1586 | NA     | NA    | NA     | NA    | 0.85  | 6.54E-01 |
|  | <i>TMPRSS6</i> | rs4140589  | A | HOM      | 1619 | -0.027 | 0.028 | -0.082 | 0.027 | -0.97 | 3.31E-01 |
|  | <i>TMPRSS6</i> | rs4140589  | A | HET      | 1619 | -0.011 | 0.021 | -0.053 | 0.030 | -0.52 | 6.00E-01 |
|  | <i>TMPRSS6</i> | rs4140589  | A | GENO_2DF | 1619 | NA     | NA    | NA     | NA    | 0.95  | 6.23E-01 |
|  | <i>TMPRSS6</i> | rs5995380  | T | HOM      | 1699 | 0.068  | 0.049 | -0.029 | 0.165 | 1.37  | 1.70E-01 |
|  | <i>TMPRSS6</i> | rs5995380  | T | HET      | 1699 | 0.008  | 0.020 | -0.030 | 0.047 | 0.43  | 6.70E-01 |
|  | <i>TMPRSS6</i> | rs5995380  | T | GENO_2DF | 1699 | NA     | NA    | NA     | NA    | 1.95  | 3.77E-01 |
|  | <i>TMPRSS6</i> | rs11704654 | T | HOM      | 1741 | 0.056  | 0.047 | -0.036 | 0.148 | 1.19  | 2.34E-01 |
|  | <i>TMPRSS6</i> | rs11704654 | T | HET      | 1741 | 0.002  | 0.019 | -0.036 | 0.040 | 0.11  | 9.16E-01 |
|  | <i>TMPRSS6</i> | rs11704654 | T | GENO_2DF | 1741 | NA     | NA    | NA     | NA    | 1.42  | 4.92E-01 |
|  | <i>TMPRSS6</i> | rs5756515  | G | HOM      | 1701 | -0.025 | 0.027 | -0.078 | 0.028 | -0.93 | 3.51E-01 |
|  | <i>TMPRSS6</i> | rs5756515  | G | HET      | 1701 | -0.013 | 0.021 | -0.053 | 0.028 | -0.62 | 5.35E-01 |
|  | <i>TMPRSS6</i> | rs5756515  | G | GENO_2DF | 1701 | NA     | NA    | NA     | NA    | 0.90  | 6.37E-01 |
|  | <i>TMPRSS6</i> | rs5756516  | T | HOM      | 1701 | -0.025 | 0.027 | -0.078 | 0.028 | -0.93 | 3.51E-01 |
|  | <i>TMPRSS6</i> | rs5756516  | T | HET      | 1701 | -0.013 | 0.021 | -0.053 | 0.028 | -0.62 | 5.35E-01 |
|  | <i>TMPRSS6</i> | rs5756516  | T | GENO_2DF | 1701 | NA     | NA    | NA     | NA    | 0.90  | 6.37E-01 |
|  | <i>TMPRSS6</i> | rs228909   | G | HOM      | 1821 | 0.046  | 0.043 | -0.037 | 0.130 | 1.09  | 2.77E-01 |
|  | <i>TMPRSS6</i> | rs228909   | G | HET      | 1821 | -0.002 | 0.019 | -0.038 | 0.035 | -0.08 | 9.36E-01 |
|  | <i>TMPRSS6</i> | rs228909   | G | GENO_2DF | 1821 | NA     | NA    | NA     | NA    | 1.24  | 5.37E-01 |
|  | <i>TMPRSS6</i> | rs228910   | A | HOM      | 1821 | 0.006  | 0.027 | -0.046 | 0.058 | 0.24  | 8.11E-01 |
|  | <i>TMPRSS6</i> | rs228910   | A | HET      | 1821 | -0.005 | 0.019 | -0.041 | 0.032 | -0.25 | 7.99E-01 |
|  | <i>TMPRSS6</i> | rs228910   | A | GENO_2DF | 1821 | NA     | NA    | NA     | NA    | 0.20  | 9.04E-01 |
|  | <i>TMPRSS6</i> | rs2235329  | C | HOM      | 1702 | -0.029 | 0.027 | -0.083 | 0.024 | -1.07 | 2.83E-01 |
|  | <i>TMPRSS6</i> | rs2235329  | C | HET      | 1702 | -0.012 | 0.020 | -0.052 | 0.028 | -0.60 | 5.50E-01 |

|  |                |            |   |          |      |        |       |        |       |       |          |
|--|----------------|------------|---|----------|------|--------|-------|--------|-------|-------|----------|
|  | <i>TMPRSS6</i> | rs2235329  | C | GENO_2DF | 1702 | NA     | NA    | NA     | NA    | 1.16  | 5.60E-01 |
|  | <i>TMPRSS6</i> | rs228913   | C | HOM      | 1821 | 0.038  | 0.047 | -0.054 | 0.130 | 0.81  | 4.20E-01 |
|  | <i>TMPRSS6</i> | rs228913   | C | HET      | 1821 | 0.017  | 0.019 | -0.020 | 0.054 | 0.91  | 3.65E-01 |
|  | <i>TMPRSS6</i> | rs228913   | C | GENO_2DF | 1821 | NA     | NA    | NA     | NA    | 1.30  | 5.22E-01 |
|  | <i>TMPRSS6</i> | rs228916   | C | HOM      | 1808 | -0.003 | 0.078 | -0.156 | 0.151 | -0.03 | 9.75E-01 |
|  | <i>TMPRSS6</i> | rs228916   | C | HET      | 1808 | 0.009  | 0.021 | -0.033 | 0.050 | 0.40  | 6.87E-01 |
|  | <i>TMPRSS6</i> | rs228916   | C | GENO_2DF | 1808 | NA     | NA    | NA     | NA    | 0.17  | 9.20E-01 |
|  | <i>TMPRSS6</i> | rs228918   | C | HOM      | 1820 | 0.021  | 0.025 | -0.028 | 0.070 | 0.84  | 4.02E-01 |
|  | <i>TMPRSS6</i> | rs228918   | C | HET      | 1820 | -0.022 | 0.019 | -0.059 | 0.015 | -1.15 | 2.50E-01 |
|  | <i>TMPRSS6</i> | rs228918   | C | GENO_2DF | 1820 | NA     | NA    | NA     | NA    | 3.62  | 1.64E-01 |
|  | <i>TMPRSS6</i> | rs228919   | T | HOM      | 1820 | 0.022  | 0.025 | -0.027 | 0.071 | 0.88  | 3.80E-01 |
|  | <i>TMPRSS6</i> | rs228919   | T | HET      | 1820 | -0.021 | 0.019 | -0.059 | 0.016 | -1.11 | 2.67E-01 |
|  | <i>TMPRSS6</i> | rs228919   | T | GENO_2DF | 1820 | NA     | NA    | NA     | NA    | 3.59  | 1.66E-01 |
|  | <i>TMPRSS6</i> | rs2092169  | T | HOM      | 1140 | 0.064  | 0.152 | -0.233 | 0.361 | 0.42  | 6.74E-01 |
|  | <i>TMPRSS6</i> | rs2092169  | T | HET      | 1140 | -0.041 | 0.031 | -0.101 | 0.020 | -1.31 | 1.89E-01 |
|  | <i>TMPRSS6</i> | rs2092169  | T | GENO_2DF | 1140 | NA     | NA    | NA     | NA    | 1.94  | 3.79E-01 |
|  | <i>TMPRSS6</i> | rs228921   | G | HOM      | 1819 | 0.022  | 0.025 | -0.027 | 0.071 | 0.88  | 3.80E-01 |
|  | <i>TMPRSS6</i> | rs228921   | G | HET      | 1819 | -0.021 | 0.019 | -0.059 | 0.016 | -1.11 | 2.67E-01 |
|  | <i>TMPRSS6</i> | rs228921   | G | GENO_2DF | 1819 | NA     | NA    | NA     | NA    | 3.59  | 1.66E-01 |
|  | <i>TMPRSS6</i> | rs3076475  | T | HOM      | 1078 | 0.039  | 0.056 | -0.070 | 0.148 | 0.70  | 4.85E-01 |
|  | <i>TMPRSS6</i> | rs3076475  | T | HET      | 1078 | -0.014 | 0.025 | -0.062 | 0.035 | -0.55 | 5.85E-01 |
|  | <i>TMPRSS6</i> | rs3076475  | T | GENO_2DF | 1078 | NA     | NA    | NA     | NA    | 0.98  | 6.13E-01 |
|  | <i>TMPRSS6</i> | rs228924   | A | HOM      | 1821 | -0.002 | 0.078 | -0.156 | 0.151 | -0.03 | 9.75E-01 |
|  | <i>TMPRSS6</i> | rs228924   | A | HET      | 1821 | 0.003  | 0.021 | -0.039 | 0.044 | 0.13  | 8.96E-01 |
|  | <i>TMPRSS6</i> | rs228924   | A | GENO_2DF | 1821 | NA     | NA    | NA     | NA    | 0.02  | 9.91E-01 |
|  | <i>TMPRSS6</i> | rs228925   | A | HOM      | 1139 | 0.007  | 0.049 | -0.090 | 0.104 | 0.13  | 8.93E-01 |
|  | <i>TMPRSS6</i> | rs228925   | A | HET      | 1139 | -0.030 | 0.024 | -0.076 | 0.016 | -1.27 | 2.03E-01 |
|  | <i>TMPRSS6</i> | rs228925   | A | GENO_2DF | 1139 | NA     | NA    | NA     | NA    | 1.76  | 4.14E-01 |
|  | <i>TMPRSS6</i> | rs5756520  | A | HOM      | 1817 | 0.022  | 0.025 | -0.027 | 0.071 | 0.88  | 3.79E-01 |
|  | <i>TMPRSS6</i> | rs5756520  | A | HET      | 1817 | -0.022 | 0.019 | -0.059 | 0.016 | -1.13 | 2.60E-01 |
|  | <i>TMPRSS6</i> | rs5756520  | A | GENO_2DF | 1817 | NA     | NA    | NA     | NA    | 3.67  | 1.60E-01 |
|  | <i>TMPRSS6</i> | rs11914132 | T | HOM      | 1822 | 0.041  | 0.035 | -0.029 | 0.110 | 1.15  | 2.49E-01 |
|  | <i>TMPRSS6</i> | rs11914132 | T | HET      | 1822 | -0.030 | 0.018 | -0.066 | 0.006 | -1.64 | 1.01E-01 |

|      |                |            |   |          |      |        |       |        |       |       |          |
|------|----------------|------------|---|----------|------|--------|-------|--------|-------|-------|----------|
|      | <i>TMPRSS6</i> | rs11914132 | T | GENO_2DF | 1822 | NA     | NA    | NA     | NA    | 4.94  | 8.45E-02 |
|      | <i>TMPRSS6</i> | rs738297   | C | HOM      | 1810 | 0.027  | 0.048 | -0.067 | 0.121 | 0.57  | 5.70E-01 |
|      | <i>TMPRSS6</i> | rs738297   | C | HET      | 1810 | 0.015  | 0.019 | -0.023 | 0.052 | 0.78  | 4.38E-01 |
|      | <i>TMPRSS6</i> | rs738297   | C | GENO_2DF | 1810 | NA     | NA    | NA     | NA    | 0.83  | 6.60E-01 |
|      | <i>TMPRSS6</i> | rs11089823 | C | HOM      | 1813 | 0.038  | 0.035 | -0.032 | 0.107 | 1.06  | 2.88E-01 |
|      | <i>TMPRSS6</i> | rs11089823 | C | HET      | 1813 | -0.032 | 0.018 | -0.068 | 0.004 | -1.72 | 8.60E-02 |
|      | <i>TMPRSS6</i> | rs11089823 | C | GENO_2DF | 1813 | NA     | NA    | NA     | NA    | 4.97  | 8.33E-02 |
|      | <i>TMPRSS6</i> | rs11089824 | C | HOM      | 1813 | 0.038  | 0.035 | -0.032 | 0.107 | 1.06  | 2.88E-01 |
|      | <i>TMPRSS6</i> | rs11089824 | C | HET      | 1813 | -0.032 | 0.018 | -0.068 | 0.004 | -1.72 | 8.60E-02 |
|      | <i>TMPRSS6</i> | rs11089824 | C | GENO_2DF | 1813 | NA     | NA    | NA     | NA    | 4.97  | 8.33E-02 |
| iron | <i>HFE</i>     | rs9295687  | C | HOM      | 1745 | 1.082  | 0.385 | 0.328  | 1.836 | 2.81  | 4.98E-03 |
|      | <i>HFE</i>     | rs9295687  | C | HET      | 1745 | 0.197  | 0.283 | -0.357 | 0.750 | 0.70  | 4.87E-01 |
|      | <i>HFE</i>     | rs9295687  | C | GENO_2DF | 1745 | NA     | NA    | NA     | NA    | 8.33  | 1.55E-02 |
|      | <i>HFE</i>     | rs4529296  | G | HOM      | 1745 | 1.082  | 0.385 | 0.328  | 1.836 | 2.81  | 4.98E-03 |
|      | <i>HFE</i>     | rs4529296  | G | HET      | 1745 | 0.197  | 0.283 | -0.357 | 0.750 | 0.70  | 4.87E-01 |
|      | <i>HFE</i>     | rs4529296  | G | GENO_2DF | 1745 | NA     | NA    | NA     | NA    | 8.33  | 1.55E-02 |
|      | <i>HFE</i>     | rs9379825  | A | HOM      | 1745 | 1.082  | 0.385 | 0.328  | 1.836 | 2.81  | 4.98E-03 |
|      | <i>HFE</i>     | rs9379825  | A | HET      | 1745 | 0.197  | 0.283 | -0.357 | 0.750 | 0.70  | 4.87E-01 |
|      | <i>HFE</i>     | rs9379825  | A | GENO_2DF | 1745 | NA     | NA    | NA     | NA    | 8.33  | 1.55E-02 |
|      | <i>HFE</i>     | rs9467672  | T | HOM      | 1745 | 1.082  | 0.385 | 0.328  | 1.836 | 2.81  | 4.98E-03 |
|      | <i>HFE</i>     | rs9467672  | T | HET      | 1745 | 0.197  | 0.283 | -0.357 | 0.750 | 0.70  | 4.87E-01 |
|      | <i>HFE</i>     | rs9467672  | T | GENO_2DF | 1745 | NA     | NA    | NA     | NA    | 8.33  | 1.55E-02 |
|      | <i>HFE</i>     | rs9295688  | A | HOM      | 1744 | 1.024  | 0.384 | 0.270  | 1.777 | 2.66  | 7.82E-03 |
|      | <i>HFE</i>     | rs9295688  | A | HET      | 1744 | 0.194  | 0.282 | -0.359 | 0.746 | 0.69  | 4.93E-01 |
|      | <i>HFE</i>     | rs9295688  | A | GENO_2DF | 1744 | NA     | NA    | NA     | NA    | 7.43  | 2.44E-02 |
|      | <i>HFE</i>     | rs2006736  | T | HOM      | 1744 | 1.024  | 0.384 | 0.270  | 1.777 | 2.66  | 7.82E-03 |
|      | <i>HFE</i>     | rs2006736  | T | HET      | 1744 | 0.194  | 0.282 | -0.359 | 0.746 | 0.69  | 4.93E-01 |
|      | <i>HFE</i>     | rs2006736  | T | GENO_2DF | 1744 | NA     | NA    | NA     | NA    | 7.43  | 2.44E-02 |
|      | <i>HFE</i>     | rs1800702  | G | HOM      | 1744 | 1.024  | 0.384 | 0.270  | 1.777 | 2.66  | 7.82E-03 |
|      | <i>HFE</i>     | rs1800702  | G | HET      | 1744 | 0.194  | 0.282 | -0.359 | 0.746 | 0.69  | 4.93E-01 |
|      | <i>HFE</i>     | rs1800702  | G | GENO_2DF | 1744 | NA     | NA    | NA     | NA    | 7.43  | 2.44E-02 |
|      | <i>HFE</i>     | rs2794720  | C | HOM      | 1744 | 1.024  | 0.384 | 0.270  | 1.777 | 2.66  | 7.82E-03 |
|      | <i>HFE</i>     | rs2794720  | C | HET      | 1744 | 0.194  | 0.282 | -0.359 | 0.746 | 0.69  | 4.93E-01 |



|  |     |           |   |          |      |        |       |        |        |       |          |
|--|-----|-----------|---|----------|------|--------|-------|--------|--------|-------|----------|
|  | HFE | rs2794720 | C | GENO_2DF | 1744 | NA     | NA    | NA     | NA     | 7.43  | 2.44E-02 |
|  | HFE | rs2794719 | G | HOM      | 1744 | 1.024  | 0.384 | 0.270  | 1.777  | 2.66  | 7.82E-03 |
|  | HFE | rs2794719 | G | HET      | 1744 | 0.194  | 0.282 | -0.359 | 0.746  | 0.69  | 4.93E-01 |
|  | HFE | rs2794719 | G | GENO_2DF | 1744 | NA     | NA    | NA     | NA     | 7.43  | 2.44E-02 |
|  | HFE | rs9366637 | T | HOM      | 1804 | -4.797 | 1.994 | -8.705 | -0.889 | -2.41 | 1.62E-02 |
|  | HFE | rs9366637 | T | HET      | 1804 | -0.845 | 0.405 | -1.638 | -0.051 | -2.09 | 3.71E-02 |
|  | HFE | rs9366637 | T | GENO_2DF | 1804 | NA     | NA    | NA     | NA     | 9.91  | 7.04E-03 |
|  | HFE | rs1799945 | G | HOM      | 1755 | 1.533  | 0.723 | 0.116  | 2.949  | 2.12  | 3.41E-02 |
|  | HFE | rs1799945 | G | HET      | 1755 | 1.271  | 0.294 | 0.694  | 1.848  | 4.32  | 1.65E-05 |
|  | HFE | rs1799945 | G | GENO_2DF | 1755 | NA     | NA    | NA     | NA     | 21.48 | 2.17E-05 |
|  | HFE | rs2071303 | C | HOM      | 1804 | 0.663  | 0.408 | -0.136 | 1.461  | 1.63  | 1.04E-01 |
|  | HFE | rs2071303 | C | HET      | 1804 | 0.609  | 0.268 | 0.085  | 1.134  | 2.28  | 2.29E-02 |
|  | HFE | rs2071303 | C | GENO_2DF | 1804 | NA     | NA    | NA     | NA     | 5.95  | 5.12E-02 |
|  | HFE | rs1800562 | A | HOM      | 1804 | NA     | NA    | NA     | NA     | NA    | NA       |
|  | HFE | rs1800562 | A | HET      | 1804 | NA     | NA    | NA     | NA     | NA    | NA       |
|  | HFE | rs1800562 | A | GENO_2DF | 1804 | NA     | NA    | NA     | NA     | NA    | NA       |
|  | HFE | rs1800708 | C | HOM      | 1803 | -4.607 | 2.151 | -8.823 | -0.392 | -2.14 | 3.23E-02 |
|  | HFE | rs1800708 | C | HET      | 1803 | -1.051 | 0.397 | -1.829 | -0.272 | -2.65 | 8.25E-03 |
|  | HFE | rs1800708 | C | GENO_2DF | 1803 | NA     | NA    | NA     | NA     | 11.33 | 3.46E-03 |
|  | HFE | rs2858996 | T | HOM      | 1803 | -0.030 | 0.731 | -1.463 | 1.404  | -0.04 | 9.68E-01 |
|  | HFE | rs2858996 | T | HET      | 1803 | 0.075  | 0.296 | -0.505 | 0.655  | 0.25  | 8.00E-01 |
|  | HFE | rs2858996 | T | GENO_2DF | 1803 | NA     | NA    | NA     | NA     | 0.08  | 9.63E-01 |
|  | HFE | rs1572982 | A | HOM      | 1804 | 0.737  | 0.369 | 0.014  | 1.460  | 2.00  | 4.58E-02 |
|  | HFE | rs1572982 | A | HET      | 1804 | 0.553  | 0.294 | -0.024 | 1.130  | 1.88  | 6.04E-02 |
|  | HFE | rs1572982 | A | GENO_2DF | 1804 | NA     | NA    | NA     | NA     | 4.91  | 8.59E-02 |
|  | HFE | rs707889  | A | HOM      | 1804 | -0.026 | 0.731 | -1.459 | 1.407  | -0.04 | 9.72E-01 |
|  | HFE | rs707889  | A | HET      | 1804 | 0.075  | 0.296 | -0.505 | 0.655  | 0.25  | 8.00E-01 |
|  | HFE | rs707889  | A | GENO_2DF | 1804 | NA     | NA    | NA     | NA     | 0.07  | 9.63E-01 |
|  | HFE | rs1045537 | C | HOM      | 1753 | -0.849 | 0.936 | -2.682 | 0.985  | -0.91 | 3.65E-01 |
|  | HFE | rs1045537 | C | HET      | 1753 | -0.125 | 0.303 | -0.718 | 0.468  | -0.41 | 6.80E-01 |
|  | HFE | rs1045537 | C | GENO_2DF | 1753 | NA     | NA    | NA     | NA     | 0.94  | 6.25E-01 |
|  | HFE | rs12346   | T | HOM      | 1804 | -0.762 | 0.427 | -1.599 | 0.076  | -1.78 | 7.49E-02 |
|  | HFE | rs12346   | T | HET      | 1804 | -0.540 | 0.264 | -1.057 | -0.023 | -2.05 | 4.06E-02 |

|  |     |            |   |          |      |        |       |        |        |       |          |
|--|-----|------------|---|----------|------|--------|-------|--------|--------|-------|----------|
|  | HFE | rs12346    | T | GENO_2DF | 1804 | NA     | NA    | NA     | NA     | 5.58  | 6.14E-02 |
|  | HFE | rs17596719 | A | HOM      | 1802 | 0.120  | 1.190 | -2.213 | 2.453  | 0.10  | 9.20E-01 |
|  | HFE | rs17596719 | A | HET      | 1802 | -0.048 | 0.315 | -0.665 | 0.569  | -0.15 | 8.79E-01 |
|  | HFE | rs17596719 | A | GENO_2DF | 1802 | NA     | NA    | NA     | NA     | 0.04  | 9.83E-01 |
|  | HFE | rs6918586  | C | HOM      | 1801 | 1.285  | 0.379 | 0.542  | 2.028  | 3.39  | 7.17E-04 |
|  | HFE | rs6918586  | C | HET      | 1801 | 0.897  | 0.277 | 0.353  | 1.440  | 3.23  | 1.26E-03 |
|  | HFE | rs6918586  | C | GENO_2DF | 1801 | NA     | NA    | NA     | NA     | 15.20 | 5.00E-04 |
|  | HFE | rs9393685  | C | HOM      | 1797 | -4.601 | 2.148 | -8.811 | -0.390 | -2.14 | 3.24E-02 |
|  | HFE | rs9393685  | C | HET      | 1797 | -0.918 | 0.388 | -1.678 | -0.159 | -2.37 | 1.79E-02 |
|  | HFE | rs9393685  | C | GENO_2DF | 1797 | NA     | NA    | NA     | NA     | 9.97  | 6.84E-03 |
|  | HFE | rs1150659  | A | HOM      | 1802 | -0.190 | 0.725 | -1.611 | 1.231  | -0.26 | 7.93E-01 |
|  | HFE | rs1150659  | A | HET      | 1802 | 0.088  | 0.297 | -0.494 | 0.669  | 0.30  | 7.68E-01 |
|  | HFE | rs1150659  | A | GENO_2DF | 1802 | NA     | NA    | NA     | NA     | 0.21  | 9.01E-01 |
|  | HFE | rs1150660  | A | HOM      | 1804 | -0.762 | 0.427 | -1.599 | 0.076  | -1.78 | 7.49E-02 |
|  | HFE | rs1150660  | A | HET      | 1804 | -0.540 | 0.264 | -1.057 | -0.023 | -2.05 | 4.06E-02 |
|  | HFE | rs1150660  | A | GENO_2DF | 1804 | NA     | NA    | NA     | NA     | 5.58  | 6.14E-02 |
|  | HFE | rs198857   | G | HOM      | 1802 | 0.765  | 0.369 | 0.042  | 1.488  | 2.08  | 3.81E-02 |
|  | HFE | rs198857   | G | HET      | 1802 | 0.596  | 0.295 | 0.019  | 1.174  | 2.02  | 4.31E-02 |
|  | HFE | rs198857   | G | GENO_2DF | 1802 | NA     | NA    | NA     | NA     | 5.47  | 6.48E-02 |
|  | HFE | rs198856   | G | HOM      | 1802 | 0.765  | 0.369 | 0.042  | 1.488  | 2.08  | 3.81E-02 |
|  | HFE | rs198856   | G | HET      | 1802 | 0.596  | 0.295 | 0.019  | 1.174  | 2.02  | 4.31E-02 |
|  | HFE | rs198856   | G | GENO_2DF | 1802 | NA     | NA    | NA     | NA     | 5.47  | 6.48E-02 |
|  | HFE | rs1543680  | A | HOM      | 1798 | -0.250 | 0.732 | -1.684 | 1.184  | -0.34 | 7.33E-01 |
|  | HFE | rs1543680  | A | HET      | 1798 | 0.095  | 0.298 | -0.489 | 0.678  | 0.32  | 7.50E-01 |
|  | HFE | rs1543680  | A | GENO_2DF | 1798 | NA     | NA    | NA     | NA     | 0.29  | 8.64E-01 |
|  | HFE | rs198855   | A | HOM      | 1755 | 0.973  | 0.488 | 0.017  | 1.928  | 2.00  | 4.62E-02 |
|  | HFE | rs198855   | A | HET      | 1755 | 1.138  | 0.265 | 0.618  | 1.659  | 4.29  | 1.89E-05 |
|  | HFE | rs198855   | A | GENO_2DF | 1755 | NA     | NA    | NA     | NA     | 19.45 | 5.97E-05 |
|  | HFE | rs7743957  | C | HOM      | 1797 | -4.601 | 2.148 | -8.811 | -0.390 | -2.14 | 3.24E-02 |
|  | HFE | rs7743957  | C | HET      | 1797 | -0.918 | 0.388 | -1.678 | -0.159 | -2.37 | 1.79E-02 |
|  | HFE | rs7743957  | C | GENO_2DF | 1797 | NA     | NA    | NA     | NA     | 9.97  | 6.84E-03 |
|  | HFE | rs198854   | T | HOM      | 1803 | 0.754  | 0.369 | 0.031  | 1.476  | 2.05  | 4.10E-02 |
|  | HFE | rs198854   | T | HET      | 1803 | 0.596  | 0.295 | 0.019  | 1.174  | 2.02  | 4.31E-02 |

|  |                |           |   |          |      |        |       |        |        |       |          |
|--|----------------|-----------|---|----------|------|--------|-------|--------|--------|-------|----------|
|  | <i>HFE</i>     | rs198854  | T | GENO_2DF | 1803 | NA     | NA    | NA     | NA     | 5.39  | 6.76E-02 |
|  | <i>HFE</i>     | rs198853  | C | HOM      | 1804 | -0.762 | 0.427 | -1.599 | 0.076  | -1.78 | 7.49E-02 |
|  | <i>HFE</i>     | rs198853  | C | HET      | 1804 | -0.540 | 0.264 | -1.057 | -0.023 | -2.05 | 4.06E-02 |
|  | <i>HFE</i>     | rs198853  | C | GENO_2DF | 1804 | NA     | NA    | NA     | NA     | 5.58  | 6.14E-02 |
|  | <i>HFE</i>     | rs2229768 | C | HOM      | 1803 | -0.187 | 0.725 | -1.608 | 1.234  | -0.26 | 7.97E-01 |
|  | <i>HFE</i>     | rs2229768 | C | HET      | 1803 | 0.091  | 0.297 | -0.490 | 0.673  | 0.31  | 7.58E-01 |
|  | <i>HFE</i>     | rs2229768 | C | GENO_2DF | 1803 | NA     | NA    | NA     | NA     | 0.22  | 8.98E-01 |
|  | <i>HFE</i>     | rs198852  | G | HOM      | 1804 | -0.878 | 0.395 | -1.653 | -0.103 | -2.22 | 2.65E-02 |
|  | <i>HFE</i>     | rs198852  | G | HET      | 1804 | -0.567 | 0.278 | -1.112 | -0.022 | -2.04 | 4.17E-02 |
|  | <i>HFE</i>     | rs198852  | G | GENO_2DF | 1804 | NA     | NA    | NA     | NA     | 6.30  | 4.28E-02 |
|  | <i>HFE</i>     | rs198851  | T | HOM      | 1646 | 0.828  | 0.827 | -0.793 | 2.448  | 1.00  | 3.17E-01 |
|  | <i>HFE</i>     | rs198851  | T | HET      | 1646 | 1.473  | 0.316 | 0.854  | 2.092  | 4.66  | 3.39E-06 |
|  | <i>HFE</i>     | rs198851  | T | GENO_2DF | 1646 | NA     | NA    | NA     | NA     | 22.08 | 1.61E-05 |
|  | <i>HFE</i>     | rs198848  | T | HOM      | 1804 | -0.878 | 0.395 | -1.653 | -0.103 | -2.22 | 2.65E-02 |
|  | <i>HFE</i>     | rs198848  | T | HET      | 1804 | -0.567 | 0.278 | -1.112 | -0.022 | -2.04 | 4.17E-02 |
|  | <i>HFE</i>     | rs198848  | T | GENO_2DF | 1804 | NA     | NA    | NA     | NA     | 6.30  | 4.28E-02 |
|  | <i>TMPRSS6</i> | rs2235320 | T | HOM      | 1803 | -1.399 | 1.047 | -3.451 | 0.653  | -1.34 | 1.82E-01 |
|  | <i>TMPRSS6</i> | rs2235320 | T | HET      | 1803 | -0.350 | 0.314 | -0.965 | 0.265  | -1.12 | 2.65E-01 |
|  | <i>TMPRSS6</i> | rs2235320 | T | GENO_2DF | 1803 | NA     | NA    | NA     | NA     | 2.73  | 2.56E-01 |
|  | <i>TMPRSS6</i> | rs2235321 | A | HOM      | 1560 | -1.039 | 0.600 | -2.214 | 0.137  | -1.73 | 8.34E-02 |
|  | <i>TMPRSS6</i> | rs2235321 | A | HET      | 1560 | -0.841 | 0.366 | -1.558 | -0.124 | -2.30 | 2.17E-02 |
|  | <i>TMPRSS6</i> | rs2235321 | A | GENO_2DF | 1560 | NA     | NA    | NA     | NA     | 5.70  | 5.78E-02 |
|  | <i>TMPRSS6</i> | rs855791  | A | HOM      | 1804 | NA     | NA    | NA     | NA     | NA    | NA       |
|  | <i>TMPRSS6</i> | rs855791  | A | HET      | 1804 | NA     | NA    | NA     | NA     | NA    | NA       |
|  | <i>TMPRSS6</i> | rs855791  | A | GENO_2DF | 1804 | NA     | NA    | NA     | NA     | NA    | NA       |
|  | <i>TMPRSS6</i> | rs5756504 | T | HOM      | 1603 | -1.183 | 0.578 | -2.316 | -0.049 | -2.05 | 4.10E-02 |
|  | <i>TMPRSS6</i> | rs5756504 | T | HET      | 1603 | -0.504 | 0.346 | -1.182 | 0.174  | -1.46 | 1.46E-01 |
|  | <i>TMPRSS6</i> | rs5756504 | T | GENO_2DF | 1603 | NA     | NA    | NA     | NA     | 4.47  | 1.07E-01 |
|  | <i>TMPRSS6</i> | rs5756505 | C | HOM      | 1647 | -1.039 | 0.573 | -2.161 | 0.083  | -1.81 | 6.98E-02 |
|  | <i>TMPRSS6</i> | rs5756505 | C | HET      | 1647 | -0.674 | 0.365 | -1.389 | 0.040  | -1.85 | 6.46E-02 |
|  | <i>TMPRSS6</i> | rs5756505 | C | GENO_2DF | 1647 | NA     | NA    | NA     | NA     | 4.36  | 1.13E-01 |
|  | <i>TMPRSS6</i> | rs5756506 | C | HOM      | 1635 | -1.053 | 0.570 | -2.170 | 0.064  | -1.85 | 6.49E-02 |
|  | <i>TMPRSS6</i> | rs5756506 | C | HET      | 1635 | -0.570 | 0.346 | -1.248 | 0.108  | -1.65 | 9.98E-02 |

|  |                |            |   |          |      |        |       |        |        |       |          |
|--|----------------|------------|---|----------|------|--------|-------|--------|--------|-------|----------|
|  | <i>TMPRSS6</i> | rs5756506  | C | GENO_2DF | 1635 | NA     | NA    | NA     | NA     | 4.13  | 1.27E-01 |
|  | <i>TMPRSS6</i> | rs4820268  | G | HOM      | 1799 | -0.369 | 0.868 | -2.070 | 1.332  | -0.43 | 6.71E-01 |
|  | <i>TMPRSS6</i> | rs4820268  | G | HET      | 1799 | -0.119 | 0.618 | -1.329 | 1.092  | -0.19 | 8.48E-01 |
|  | <i>TMPRSS6</i> | rs4820268  | G | GENO_2DF | 1799 | NA     | NA    | NA     | NA     | 0.20  | 9.06E-01 |
|  | <i>TMPRSS6</i> | rs13055107 | A | HOM      | 1603 | 3.235  | 1.127 | 1.026  | 5.445  | 2.87  | 4.16E-03 |
|  | <i>TMPRSS6</i> | rs13055107 | A | HET      | 1603 | 0.316  | 0.339 | -0.349 | 0.981  | 0.93  | 3.52E-01 |
|  | <i>TMPRSS6</i> | rs13055107 | A | GENO_2DF | 1603 | NA     | NA    | NA     | NA     | 8.65  | 1.32E-02 |
|  | <i>TMPRSS6</i> | rs2413450  | T | HOM      | 1719 | -0.451 | 0.898 | -2.210 | 1.308  | -0.50 | 6.15E-01 |
|  | <i>TMPRSS6</i> | rs2413450  | T | HET      | 1719 | -0.201 | 0.631 | -1.437 | 1.036  | -0.32 | 7.51E-01 |
|  | <i>TMPRSS6</i> | rs2413450  | T | GENO_2DF | 1719 | NA     | NA    | NA     | NA     | 0.25  | 8.81E-01 |
|  | <i>TMPRSS6</i> | rs855789   | C | HOM      | 1799 | 8.011  | 3.739 | 0.684  | 15.340 | 2.14  | 3.23E-02 |
|  | <i>TMPRSS6</i> | rs855789   | C | HET      | 1799 | -0.340 | 0.433 | -1.187 | 0.508  | -0.79 | 4.32E-01 |
|  | <i>TMPRSS6</i> | rs855789   | C | GENO_2DF | 1799 | NA     | NA    | NA     | NA     | 5.28  | 7.16E-02 |
|  | <i>TMPRSS6</i> | rs855788   | A | HOM      | 1803 | -0.479 | 0.438 | -1.338 | 0.380  | -1.09 | 2.75E-01 |
|  | <i>TMPRSS6</i> | rs855788   | A | HET      | 1803 | -0.133 | 0.289 | -0.700 | 0.434  | -0.46 | 6.45E-01 |
|  | <i>TMPRSS6</i> | rs855788   | A | GENO_2DF | 1803 | NA     | NA    | NA     | NA     | 1.20  | 5.50E-01 |
|  | <i>TMPRSS6</i> | rs17750017 | A | HOM      | 1790 | NA     | NA    | NA     | NA     | NA    | NA       |
|  | <i>TMPRSS6</i> | rs17750017 | A | HET      | 1790 | NA     | NA    | NA     | NA     | NA    | NA       |
|  | <i>TMPRSS6</i> | rs17750017 | A | GENO_2DF | 1790 | NA     | NA    | NA     | NA     | NA    | NA       |
|  | <i>TMPRSS6</i> | rs2743820  | C | HOM      | 1575 | -0.624 | 0.465 | -1.536 | 0.288  | -1.34 | 1.80E-01 |
|  | <i>TMPRSS6</i> | rs2743820  | C | HET      | 1575 | 0.027  | 0.296 | -0.554 | 0.608  | 0.09  | 9.28E-01 |
|  | <i>TMPRSS6</i> | rs2743820  | C | GENO_2DF | 1575 | NA     | NA    | NA     | NA     | 2.30  | 3.17E-01 |
|  | <i>TMPRSS6</i> | rs1005478  | A | HOM      | 1535 | 0.299  | 0.416 | -0.517 | 1.115  | 0.72  | 4.73E-01 |
|  | <i>TMPRSS6</i> | rs1005478  | A | HET      | 1535 | 0.109  | 0.285 | -0.449 | 0.667  | 0.38  | 7.03E-01 |
|  | <i>TMPRSS6</i> | rs1005478  | A | GENO_2DF | 1535 | NA     | NA    | NA     | NA     | 0.53  | 7.66E-01 |
|  | <i>TMPRSS6</i> | rs7286184  | G | HOM      | 1544 | -0.876 | 0.639 | -2.129 | 0.377  | -1.37 | 1.71E-01 |
|  | <i>TMPRSS6</i> | rs7286184  | G | HET      | 1544 | -0.111 | 0.305 | -0.709 | 0.487  | -0.36 | 7.16E-01 |
|  | <i>TMPRSS6</i> | rs7286184  | G | GENO_2DF | 1544 | NA     | NA    | NA     | NA     | 1.88  | 3.91E-01 |
|  | <i>TMPRSS6</i> | rs2246092  | G | HOM      | 1534 | 0.414  | 0.413 | -0.396 | 1.224  | 1.00  | 3.17E-01 |
|  | <i>TMPRSS6</i> | rs2246092  | G | HET      | 1534 | 0.147  | 0.285 | -0.412 | 0.705  | 0.51  | 6.07E-01 |
|  | <i>TMPRSS6</i> | rs2246092  | G | GENO_2DF | 1534 | NA     | NA    | NA     | NA     | 1.03  | 5.97E-01 |
|  | <i>TMPRSS6</i> | rs2543519  | G | HOM      | 1559 | -0.575 | 0.561 | -1.674 | 0.524  | -1.03 | 3.05E-01 |
|  | <i>TMPRSS6</i> | rs2543519  | G | HET      | 1559 | -0.087 | 0.293 | -0.662 | 0.487  | -0.30 | 7.66E-01 |

|  |                |           |   |          |      |        |       |        |        |       |          |
|--|----------------|-----------|---|----------|------|--------|-------|--------|--------|-------|----------|
|  | <i>TMPRSS6</i> | rs2543519 | G | GENO_2DF | 1559 | NA     | NA    | NA     | NA     | 1.05  | 5.91E-01 |
|  | <i>TMPRSS6</i> | rs2111833 | T | HOM      | 1598 | -0.585 | 0.461 | -1.487 | 0.318  | -1.27 | 2.04E-01 |
|  | <i>TMPRSS6</i> | rs2111833 | T | HET      | 1598 | -0.011 | 0.293 | -0.585 | 0.563  | -0.04 | 9.71E-01 |
|  | <i>TMPRSS6</i> | rs2111833 | T | GENO_2DF | 1598 | NA     | NA    | NA     | NA     | 1.89  | 3.90E-01 |
|  | <i>TMPRSS6</i> | rs2179229 | G | HOM      | 1550 | 0.445  | 0.409 | -0.357 | 1.246  | 1.09  | 2.77E-01 |
|  | <i>TMPRSS6</i> | rs2179229 | G | HET      | 1550 | 0.163  | 0.283 | -0.392 | 0.718  | 0.58  | 5.65E-01 |
|  | <i>TMPRSS6</i> | rs2179229 | G | GENO_2DF | 1550 | NA     | NA    | NA     | NA     | 1.22  | 5.44E-01 |
|  | <i>TMPRSS6</i> | rs2235323 | C | HOM      | 1801 | 0.024  | 0.419 | -0.797 | 0.845  | 0.06  | 9.54E-01 |
|  | <i>TMPRSS6</i> | rs2235323 | C | HET      | 1801 | 0.203  | 0.278 | -0.342 | 0.749  | 0.73  | 4.66E-01 |
|  | <i>TMPRSS6</i> | rs2235323 | C | GENO_2DF | 1801 | NA     | NA    | NA     | NA     | 0.61  | 7.37E-01 |
|  | <i>TMPRSS6</i> | rs2235324 | C | HOM      | 1803 | 0.001  | 0.418 | -0.818 | 0.821  | 0.00  | 9.97E-01 |
|  | <i>TMPRSS6</i> | rs2235324 | C | HET      | 1803 | 0.189  | 0.278 | -0.356 | 0.734  | 0.68  | 4.97E-01 |
|  | <i>TMPRSS6</i> | rs2235324 | C | GENO_2DF | 1803 | NA     | NA    | NA     | NA     | 0.56  | 7.55E-01 |
|  | <i>TMPRSS6</i> | rs736852  | C | HOM      | 1790 | 0.058  | 0.413 | -0.750 | 0.867  | 0.14  | 8.87E-01 |
|  | <i>TMPRSS6</i> | rs736852  | C | HET      | 1790 | 0.251  | 0.287 | -0.312 | 0.814  | 0.87  | 3.83E-01 |
|  | <i>TMPRSS6</i> | rs736852  | C | GENO_2DF | 1790 | NA     | NA    | NA     | NA     | 0.85  | 6.53E-01 |
|  | <i>TMPRSS6</i> | rs2019848 | A | HOM      | 1739 | -1.189 | 0.600 | -2.364 | -0.014 | -1.98 | 4.75E-02 |
|  | <i>TMPRSS6</i> | rs2019848 | A | HET      | 1739 | -0.118 | 0.291 | -0.688 | 0.452  | -0.41 | 6.85E-01 |
|  | <i>TMPRSS6</i> | rs2019848 | A | GENO_2DF | 1739 | NA     | NA    | NA     | NA     | 3.95  | 1.39E-01 |
|  | <i>TMPRSS6</i> | rs1421312 | G | HOM      | 1803 | 0.097  | 0.415 | -0.716 | 0.910  | 0.23  | 8.16E-01 |
|  | <i>TMPRSS6</i> | rs1421312 | G | HET      | 1803 | 0.288  | 0.280 | -0.260 | 0.836  | 1.03  | 3.03E-01 |
|  | <i>TMPRSS6</i> | rs1421312 | G | GENO_2DF | 1803 | NA     | NA    | NA     | NA     | 1.12  | 5.72E-01 |
|  | <i>TMPRSS6</i> | rs2543514 | C | HOM      | 1795 | 0.048  | 0.412 | -0.759 | 0.855  | 0.12  | 9.07E-01 |
|  | <i>TMPRSS6</i> | rs2543514 | C | HET      | 1795 | 0.245  | 0.287 | -0.316 | 0.807  | 0.86  | 3.92E-01 |
|  | <i>TMPRSS6</i> | rs2543514 | C | GENO_2DF | 1795 | NA     | NA    | NA     | NA     | 0.83  | 6.59E-01 |
|  | <i>TMPRSS6</i> | rs2543513 | G | HOM      | 1795 | 0.048  | 0.412 | -0.759 | 0.855  | 0.12  | 9.07E-01 |
|  | <i>TMPRSS6</i> | rs2543513 | G | HET      | 1795 | 0.245  | 0.287 | -0.316 | 0.807  | 0.86  | 3.92E-01 |
|  | <i>TMPRSS6</i> | rs2543513 | G | GENO_2DF | 1795 | NA     | NA    | NA     | NA     | 0.83  | 6.59E-01 |
|  | <i>TMPRSS6</i> | rs2413451 | G | HOM      | 1795 | 0.048  | 0.412 | -0.759 | 0.855  | 0.12  | 9.07E-01 |
|  | <i>TMPRSS6</i> | rs2413451 | G | HET      | 1795 | 0.245  | 0.287 | -0.316 | 0.807  | 0.86  | 3.92E-01 |
|  | <i>TMPRSS6</i> | rs2413451 | G | GENO_2DF | 1795 | NA     | NA    | NA     | NA     | 0.83  | 6.59E-01 |
|  | <i>TMPRSS6</i> | rs2251655 | T | HOM      | 1795 | 0.048  | 0.412 | -0.759 | 0.855  | 0.12  | 9.07E-01 |
|  | <i>TMPRSS6</i> | rs2251655 | T | HET      | 1795 | 0.245  | 0.287 | -0.316 | 0.807  | 0.86  | 3.92E-01 |

|  |                |           |   |          |      |        |       |        |        |       |          |
|--|----------------|-----------|---|----------|------|--------|-------|--------|--------|-------|----------|
|  | <i>TMPRSS6</i> | rs2251655 | T | GENO_2DF | 1795 | NA     | NA    | NA     | NA     | 0.83  | 6.59E-01 |
|  | <i>TMPRSS6</i> | rs2743824 | C | HOM      | 1793 | 0.051  | 0.412 | -0.756 | 0.857  | 0.12  | 9.02E-01 |
|  | <i>TMPRSS6</i> | rs2743824 | C | HET      | 1793 | 0.245  | 0.287 | -0.317 | 0.807  | 0.85  | 3.93E-01 |
|  | <i>TMPRSS6</i> | rs2743824 | C | GENO_2DF | 1793 | NA     | NA    | NA     | NA     | 0.83  | 6.61E-01 |
|  | <i>TMPRSS6</i> | rs2543509 | G | HOM      | 1793 | 0.051  | 0.412 | -0.756 | 0.857  | 0.12  | 9.02E-01 |
|  | <i>TMPRSS6</i> | rs2543509 | G | HET      | 1793 | 0.245  | 0.287 | -0.317 | 0.807  | 0.85  | 3.93E-01 |
|  | <i>TMPRSS6</i> | rs2543509 | G | GENO_2DF | 1793 | NA     | NA    | NA     | NA     | 0.83  | 6.61E-01 |
|  | <i>TMPRSS6</i> | rs2743825 | G | HOM      | 1792 | 0.050  | 0.412 | -0.757 | 0.857  | 0.12  | 9.03E-01 |
|  | <i>TMPRSS6</i> | rs2743825 | G | HET      | 1792 | 0.243  | 0.287 | -0.319 | 0.806  | 0.85  | 3.96E-01 |
|  | <i>TMPRSS6</i> | rs2743825 | G | GENO_2DF | 1792 | NA     | NA    | NA     | NA     | 0.82  | 6.65E-01 |
|  | <i>TMPRSS6</i> | rs2160906 | A | HOM      | 1803 | -1.404 | 0.554 | -2.489 | -0.319 | -2.54 | 1.13E-02 |
|  | <i>TMPRSS6</i> | rs2160906 | A | HET      | 1803 | -0.078 | 0.279 | -0.625 | 0.470  | -0.28 | 7.81E-01 |
|  | <i>TMPRSS6</i> | rs2160906 | A | GENO_2DF | 1803 | NA     | NA    | NA     | NA     | 6.57  | 3.74E-02 |
|  | <i>TMPRSS6</i> | rs732755  | C | HOM      | 1727 | -1.373 | 0.551 | -2.453 | -0.294 | -2.50 | 1.27E-02 |
|  | <i>TMPRSS6</i> | rs732755  | C | HET      | 1727 | -0.125 | 0.284 | -0.682 | 0.431  | -0.44 | 6.60E-01 |
|  | <i>TMPRSS6</i> | rs732755  | C | GENO_2DF | 1727 | NA     | NA    | NA     | NA     | 6.27  | 4.34E-02 |
|  | <i>TMPRSS6</i> | rs8139988 | C | HOM      | 1780 | -1.313 | 0.557 | -2.405 | -0.222 | -2.36 | 1.85E-02 |
|  | <i>TMPRSS6</i> | rs8139988 | C | HET      | 1780 | -0.061 | 0.282 | -0.613 | 0.491  | -0.22 | 8.28E-01 |
|  | <i>TMPRSS6</i> | rs8139988 | C | GENO_2DF | 1780 | NA     | NA    | NA     | NA     | 5.72  | 5.74E-02 |
|  | <i>TMPRSS6</i> | rs2017764 | A | HOM      | 1772 | 0.159  | 0.423 | -0.671 | 0.988  | 0.37  | 7.08E-01 |
|  | <i>TMPRSS6</i> | rs2017764 | A | HET      | 1772 | 0.302  | 0.281 | -0.250 | 0.853  | 1.07  | 2.84E-01 |
|  | <i>TMPRSS6</i> | rs2017764 | A | GENO_2DF | 1772 | NA     | NA    | NA     | NA     | 1.16  | 5.60E-01 |
|  | <i>TMPRSS6</i> | rs733655  | C | HOM      | 1774 | -1.040 | 0.515 | -2.050 | -0.031 | -2.02 | 4.36E-02 |
|  | <i>TMPRSS6</i> | rs733655  | C | HET      | 1774 | -0.125 | 0.280 | -0.673 | 0.423  | -0.45 | 6.56E-01 |
|  | <i>TMPRSS6</i> | rs733655  | C | GENO_2DF | 1774 | NA     | NA    | NA     | NA     | 4.09  | 1.30E-01 |
|  | <i>TMPRSS6</i> | rs2281090 | A | HOM      | 1775 | -1.325 | 0.565 | -2.431 | -0.218 | -2.35 | 1.91E-02 |
|  | <i>TMPRSS6</i> | rs2281090 | A | HET      | 1775 | -0.110 | 0.283 | -0.664 | 0.444  | -0.39 | 6.97E-01 |
|  | <i>TMPRSS6</i> | rs2281090 | A | GENO_2DF | 1775 | NA     | NA    | NA     | NA     | 5.55  | 6.24E-02 |
|  | <i>TMPRSS6</i> | rs2281091 | T | HOM      | 1773 | -1.339 | 0.568 | -2.452 | -0.227 | -2.36 | 1.84E-02 |
|  | <i>TMPRSS6</i> | rs2281091 | T | HET      | 1773 | -0.109 | 0.283 | -0.663 | 0.446  | -0.38 | 7.02E-01 |
|  | <i>TMPRSS6</i> | rs2281091 | T | GENO_2DF | 1773 | NA     | NA    | NA     | NA     | 5.62  | 6.03E-02 |
|  | <i>TMPRSS6</i> | rs228906  | A | HOM      | 1804 | 0.381  | 0.393 | -0.390 | 1.151  | 0.97  | 3.33E-01 |
|  | <i>TMPRSS6</i> | rs228906  | A | HET      | 1804 | -0.016 | 0.267 | -0.539 | 0.507  | -0.06 | 9.53E-01 |

|  |                |            |   |          |      |        |       |        |       |       |          |
|--|----------------|------------|---|----------|------|--------|-------|--------|-------|-------|----------|
|  | <i>TMPRSS6</i> | rs228906   | A | GENO_2DF | 1804 | NA     | NA    | NA     | NA    | 1.13  | 5.69E-01 |
|  | <i>TMPRSS6</i> | rs7289616  | A | HOM      | 1750 | 0.126  | 0.430 | -0.717 | 0.969 | 0.29  | 7.70E-01 |
|  | <i>TMPRSS6</i> | rs7289616  | A | HET      | 1750 | 0.318  | 0.283 | -0.236 | 0.873 | 1.13  | 2.60E-01 |
|  | <i>TMPRSS6</i> | rs7289616  | A | GENO_2DF | 1750 | NA     | NA    | NA     | NA    | 1.31  | 5.20E-01 |
|  | <i>TMPRSS6</i> | rs9619658  | T | HOM      | 1444 | -0.048 | 0.517 | -1.060 | 0.965 | -0.09 | 9.26E-01 |
|  | <i>TMPRSS6</i> | rs9619658  | T | HET      | 1444 | 0.331  | 0.306 | -0.269 | 0.930 | 1.08  | 2.80E-01 |
|  | <i>TMPRSS6</i> | rs9619658  | T | GENO_2DF | 1444 | NA     | NA    | NA     | NA    | 1.42  | 4.92E-01 |
|  | <i>TMPRSS6</i> | rs228907   | A | HOM      | 1801 | 0.053  | 0.469 | -0.866 | 0.972 | 0.11  | 9.10E-01 |
|  | <i>TMPRSS6</i> | rs228907   | A | HET      | 1801 | 0.189  | 0.264 | -0.328 | 0.706 | 0.72  | 4.73E-01 |
|  | <i>TMPRSS6</i> | rs228907   | A | GENO_2DF | 1801 | NA     | NA    | NA     | NA    | 0.52  | 7.72E-01 |
|  | <i>TMPRSS6</i> | rs17750152 | T | HOM      | 1067 | -0.104 | 0.785 | -1.641 | 1.434 | -0.13 | 8.95E-01 |
|  | <i>TMPRSS6</i> | rs17750152 | T | HET      | 1067 | 0.392  | 0.364 | -0.320 | 1.105 | 1.08  | 2.81E-01 |
|  | <i>TMPRSS6</i> | rs17750152 | T | GENO_2DF | 1067 | NA     | NA    | NA     | NA    | 1.31  | 5.19E-01 |
|  | <i>TMPRSS6</i> | rs4140590  | A | HOM      | 1570 | -0.220 | 0.409 | -1.021 | 0.581 | -0.54 | 5.90E-01 |
|  | <i>TMPRSS6</i> | rs4140590  | A | HET      | 1570 | 0.055  | 0.314 | -0.560 | 0.670 | 0.18  | 8.61E-01 |
|  | <i>TMPRSS6</i> | rs4140590  | A | GENO_2DF | 1570 | NA     | NA    | NA     | NA    | 0.57  | 7.54E-01 |
|  | <i>TMPRSS6</i> | rs4140589  | A | HOM      | 1603 | -0.253 | 0.405 | -1.045 | 0.540 | -0.62 | 5.33E-01 |
|  | <i>TMPRSS6</i> | rs4140589  | A | HET      | 1603 | 0.065  | 0.309 | -0.541 | 0.670 | 0.21  | 8.34E-01 |
|  | <i>TMPRSS6</i> | rs4140589  | A | GENO_2DF | 1603 | NA     | NA    | NA     | NA    | 0.76  | 6.83E-01 |
|  | <i>TMPRSS6</i> | rs5995380  | T | HOM      | 1681 | -0.792 | 0.719 | -2.201 | 0.618 | -1.10 | 2.71E-01 |
|  | <i>TMPRSS6</i> | rs5995380  | T | HET      | 1681 | -0.111 | 0.289 | -0.678 | 0.456 | -0.38 | 7.01E-01 |
|  | <i>TMPRSS6</i> | rs5995380  | T | GENO_2DF | 1681 | NA     | NA    | NA     | NA    | 1.27  | 5.29E-01 |
|  | <i>TMPRSS6</i> | rs11704654 | T | HOM      | 1723 | -1.030 | 0.683 | -2.368 | 0.308 | -1.51 | 1.32E-01 |
|  | <i>TMPRSS6</i> | rs11704654 | T | HET      | 1723 | -0.073 | 0.282 | -0.626 | 0.479 | -0.26 | 7.95E-01 |
|  | <i>TMPRSS6</i> | rs11704654 | T | GENO_2DF | 1723 | NA     | NA    | NA     | NA    | 2.28  | 3.20E-01 |
|  | <i>TMPRSS6</i> | rs5756515  | G | HOM      | 1684 | -0.067 | 0.396 | -0.843 | 0.709 | -0.17 | 8.66E-01 |
|  | <i>TMPRSS6</i> | rs5756515  | G | HET      | 1684 | 0.138  | 0.302 | -0.453 | 0.729 | 0.46  | 6.48E-01 |
|  | <i>TMPRSS6</i> | rs5756515  | G | GENO_2DF | 1684 | NA     | NA    | NA     | NA    | 0.42  | 8.11E-01 |
|  | <i>TMPRSS6</i> | rs5756516  | T | HOM      | 1684 | -0.067 | 0.396 | -0.843 | 0.709 | -0.17 | 8.66E-01 |
|  | <i>TMPRSS6</i> | rs5756516  | T | HET      | 1684 | 0.138  | 0.302 | -0.453 | 0.729 | 0.46  | 6.48E-01 |
|  | <i>TMPRSS6</i> | rs5756516  | T | GENO_2DF | 1684 | NA     | NA    | NA     | NA    | 0.42  | 8.11E-01 |
|  | <i>TMPRSS6</i> | rs228909   | G | HOM      | 1803 | -0.446 | 0.618 | -1.656 | 0.765 | -0.72 | 4.71E-01 |
|  | <i>TMPRSS6</i> | rs228909   | G | HET      | 1803 | -0.061 | 0.272 | -0.594 | 0.473 | -0.22 | 8.23E-01 |

|  |                |           |   |          |      |        |       |        |       |       |          |
|--|----------------|-----------|---|----------|------|--------|-------|--------|-------|-------|----------|
|  | <i>TMPRSS6</i> | rs228909  | G | GENO_2DF | 1803 | NA     | NA    | NA     | NA    | 0.53  | 7.66E-01 |
|  | <i>TMPRSS6</i> | rs228910  | A | HOM      | 1803 | 0.123  | 0.387 | -0.635 | 0.881 | 0.32  | 7.51E-01 |
|  | <i>TMPRSS6</i> | rs228910  | A | HET      | 1803 | 0.327  | 0.272 | -0.206 | 0.859 | 1.20  | 2.29E-01 |
|  | <i>TMPRSS6</i> | rs228910  | A | GENO_2DF | 1803 | NA     | NA    | NA     | NA    | 1.48  | 4.78E-01 |
|  | <i>TMPRSS6</i> | rs2235329 | C | HOM      | 1687 | -0.162 | 0.397 | -0.939 | 0.615 | -0.41 | 6.83E-01 |
|  | <i>TMPRSS6</i> | rs2235329 | C | HET      | 1687 | 0.133  | 0.298 | -0.451 | 0.716 | 0.45  | 6.56E-01 |
|  | <i>TMPRSS6</i> | rs2235329 | C | GENO_2DF | 1687 | NA     | NA    | NA     | NA    | 0.71  | 7.01E-01 |
|  | <i>TMPRSS6</i> | rs228913  | C | HOM      | 1803 | 0.119  | 0.682 | -1.218 | 1.455 | 0.17  | 8.62E-01 |
|  | <i>TMPRSS6</i> | rs228913  | C | HET      | 1803 | -0.035 | 0.274 | -0.571 | 0.502 | -0.13 | 8.99E-01 |
|  | <i>TMPRSS6</i> | rs228913  | C | GENO_2DF | 1803 | NA     | NA    | NA     | NA    | 0.05  | 9.74E-01 |
|  | <i>TMPRSS6</i> | rs228916  | C | HOM      | 1790 | 0.698  | 1.133 | -1.523 | 2.919 | 0.62  | 5.38E-01 |
|  | <i>TMPRSS6</i> | rs228916  | C | HET      | 1790 | 0.392  | 0.309 | -0.214 | 0.998 | 1.27  | 2.05E-01 |
|  | <i>TMPRSS6</i> | rs228916  | C | GENO_2DF | 1790 | NA     | NA    | NA     | NA    | 1.89  | 3.89E-01 |
|  | <i>TMPRSS6</i> | rs228918  | C | HOM      | 1802 | -0.412 | 0.365 | -1.127 | 0.303 | -1.13 | 2.59E-01 |
|  | <i>TMPRSS6</i> | rs228918  | C | HET      | 1802 | -0.157 | 0.278 | -0.701 | 0.387 | -0.56 | 5.73E-01 |
|  | <i>TMPRSS6</i> | rs228918  | C | GENO_2DF | 1802 | NA     | NA    | NA     | NA    | 1.28  | 5.28E-01 |
|  | <i>TMPRSS6</i> | rs228919  | T | HOM      | 1802 | -0.419 | 0.365 | -1.134 | 0.297 | -1.15 | 2.52E-01 |
|  | <i>TMPRSS6</i> | rs228919  | T | HET      | 1802 | -0.160 | 0.278 | -0.704 | 0.384 | -0.58 | 5.65E-01 |
|  | <i>TMPRSS6</i> | rs228919  | T | GENO_2DF | 1802 | NA     | NA    | NA     | NA    | 1.32  | 5.17E-01 |
|  | <i>TMPRSS6</i> | rs2092169 | T | HOM      | 1127 | 0.618  | 2.126 | -3.548 | 4.783 | 0.29  | 7.72E-01 |
|  | <i>TMPRSS6</i> | rs2092169 | T | HET      | 1127 | -0.109 | 0.434 | -0.958 | 0.741 | -0.25 | 8.02E-01 |
|  | <i>TMPRSS6</i> | rs2092169 | T | GENO_2DF | 1127 | NA     | NA    | NA     | NA    | 0.15  | 9.27E-01 |
|  | <i>TMPRSS6</i> | rs228921  | G | HOM      | 1801 | -0.419 | 0.365 | -1.134 | 0.297 | -1.15 | 2.52E-01 |
|  | <i>TMPRSS6</i> | rs228921  | G | HET      | 1801 | -0.160 | 0.278 | -0.704 | 0.384 | -0.58 | 5.65E-01 |
|  | <i>TMPRSS6</i> | rs228921  | G | GENO_2DF | 1801 | NA     | NA    | NA     | NA    | 1.32  | 5.17E-01 |
|  | <i>TMPRSS6</i> | rs3076475 | T | HOM      | 1065 | -0.338 | 0.782 | -1.871 | 1.195 | -0.43 | 6.66E-01 |
|  | <i>TMPRSS6</i> | rs3076475 | T | HET      | 1065 | 0.353  | 0.352 | -0.336 | 1.043 | 1.00  | 3.15E-01 |
|  | <i>TMPRSS6</i> | rs3076475 | T | GENO_2DF | 1065 | NA     | NA    | NA     | NA    | 1.43  | 4.89E-01 |
|  | <i>TMPRSS6</i> | rs228924  | A | HOM      | 1803 | 0.677  | 1.135 | -1.548 | 2.903 | 0.60  | 5.51E-01 |
|  | <i>TMPRSS6</i> | rs228924  | A | HET      | 1803 | 0.342  | 0.307 | -0.259 | 0.943 | 1.11  | 2.65E-01 |
|  | <i>TMPRSS6</i> | rs228924  | A | GENO_2DF | 1803 | NA     | NA    | NA     | NA    | 1.51  | 4.70E-01 |
|  | <i>TMPRSS6</i> | rs228925  | A | HOM      | 1126 | 0.681  | 0.693 | -0.677 | 2.039 | 0.98  | 3.26E-01 |
|  | <i>TMPRSS6</i> | rs228925  | A | HET      | 1126 | 0.127  | 0.331 | -0.522 | 0.777 | 0.38  | 7.01E-01 |



|    |                |            |   |          |      |        |       |        |       |       |          |
|----|----------------|------------|---|----------|------|--------|-------|--------|-------|-------|----------|
|    | <i>TMPRSS6</i> | rs228925   | A | GENO_2DF | 1126 | NA     | NA    | NA     | NA    | 1.01  | 6.04E-01 |
|    | <i>TMPRSS6</i> | rs5756520  | A | HOM      | 1799 | -0.420 | 0.365 | -1.136 | 0.296 | -1.15 | 2.50E-01 |
|    | <i>TMPRSS6</i> | rs5756520  | A | HET      | 1799 | -0.169 | 0.278 | -0.713 | 0.376 | -0.61 | 5.45E-01 |
|    | <i>TMPRSS6</i> | rs5756520  | A | GENO_2DF | 1799 | NA     | NA    | NA     | NA    | 1.34  | 5.13E-01 |
|    | <i>TMPRSS6</i> | rs11914132 | T | HOM      | 1804 | -0.725 | 0.517 | -1.739 | 0.289 | -1.40 | 1.61E-01 |
|    | <i>TMPRSS6</i> | rs11914132 | T | HET      | 1804 | -0.175 | 0.268 | -0.700 | 0.351 | -0.65 | 5.15E-01 |
|    | <i>TMPRSS6</i> | rs11914132 | T | GENO_2DF | 1804 | NA     | NA    | NA     | NA    | 2.12  | 3.47E-01 |
|    | <i>TMPRSS6</i> | rs738297   | C | HOM      | 1793 | 0.035  | 0.694 | -1.326 | 1.395 | 0.05  | 9.60E-01 |
|    | <i>TMPRSS6</i> | rs738297   | C | HET      | 1793 | -0.102 | 0.277 | -0.645 | 0.441 | -0.37 | 7.14E-01 |
|    | <i>TMPRSS6</i> | rs738297   | C | GENO_2DF | 1793 | NA     | NA    | NA     | NA    | 0.14  | 9.31E-01 |
|    | <i>TMPRSS6</i> | rs11089823 | C | HOM      | 1796 | -0.701 | 0.516 | -1.713 | 0.311 | -1.36 | 1.75E-01 |
|    | <i>TMPRSS6</i> | rs11089823 | C | HET      | 1796 | -0.174 | 0.268 | -0.699 | 0.351 | -0.65 | 5.15E-01 |
|    | <i>TMPRSS6</i> | rs11089823 | C | GENO_2DF | 1796 | NA     | NA    | NA     | NA    | 2.00  | 3.68E-01 |
|    | <i>TMPRSS6</i> | rs11089824 | C | HOM      | 1796 | -0.701 | 0.516 | -1.713 | 0.311 | -1.36 | 1.75E-01 |
|    | <i>TMPRSS6</i> | rs11089824 | C | HET      | 1796 | -0.174 | 0.268 | -0.699 | 0.351 | -0.65 | 5.15E-01 |
|    | <i>TMPRSS6</i> | rs11089824 | C | GENO_2DF | 1796 | NA     | NA    | NA     | NA    | 2.00  | 3.68E-01 |
| TS | <i>HFE</i>     | rs9295687  | C | HOM      | 1745 | 2.271  | 0.706 | 0.888  | 3.655 | 3.22  | 1.32E-03 |
|    | <i>HFE</i>     | rs9295687  | C | HET      | 1745 | 0.354  | 0.518 | -0.662 | 1.370 | 0.68  | 4.94E-01 |
|    | <i>HFE</i>     | rs9295687  | C | GENO_2DF | 1745 | NA     | NA    | NA     | NA    | 11.11 | 3.87E-03 |
|    | <i>HFE</i>     | rs4529296  | G | HOM      | 1745 | 2.271  | 0.706 | 0.888  | 3.655 | 3.22  | 1.32E-03 |
|    | <i>HFE</i>     | rs4529296  | G | HET      | 1745 | 0.354  | 0.518 | -0.662 | 1.370 | 0.68  | 4.94E-01 |
|    | <i>HFE</i>     | rs4529296  | G | GENO_2DF | 1745 | NA     | NA    | NA     | NA    | 11.11 | 3.87E-03 |
|    | <i>HFE</i>     | rs9379825  | A | HOM      | 1745 | 2.271  | 0.706 | 0.888  | 3.655 | 3.22  | 1.32E-03 |
|    | <i>HFE</i>     | rs9379825  | A | HET      | 1745 | 0.354  | 0.518 | -0.662 | 1.370 | 0.68  | 4.94E-01 |
|    | <i>HFE</i>     | rs9379825  | A | GENO_2DF | 1745 | NA     | NA    | NA     | NA    | 11.11 | 3.87E-03 |
|    | <i>HFE</i>     | rs9467672  | T | HOM      | 1745 | 2.271  | 0.706 | 0.888  | 3.655 | 3.22  | 1.32E-03 |
|    | <i>HFE</i>     | rs9467672  | T | HET      | 1745 | 0.354  | 0.518 | -0.662 | 1.370 | 0.68  | 4.94E-01 |
|    | <i>HFE</i>     | rs9467672  | T | GENO_2DF | 1745 | NA     | NA    | NA     | NA    | 11.11 | 3.87E-03 |
|    | <i>HFE</i>     | rs9295688  | A | HOM      | 1744 | 2.211  | 0.706 | 0.826  | 3.595 | 3.13  | 1.78E-03 |
|    | <i>HFE</i>     | rs9295688  | A | HET      | 1744 | 0.351  | 0.518 | -0.664 | 1.367 | 0.68  | 4.98E-01 |
|    | <i>HFE</i>     | rs9295688  | A | GENO_2DF | 1744 | NA     | NA    | NA     | NA    | 10.48 | 5.30E-03 |
|    | <i>HFE</i>     | rs2006736  | T | HOM      | 1744 | 2.211  | 0.706 | 0.826  | 3.595 | 3.13  | 1.78E-03 |
|    | <i>HFE</i>     | rs2006736  | T | HET      | 1744 | 0.351  | 0.518 | -0.664 | 1.367 | 0.68  | 4.98E-01 |

|  |     |           |   |          |      |        |       |         |        |       |          |
|--|-----|-----------|---|----------|------|--------|-------|---------|--------|-------|----------|
|  | HFE | rs2006736 | T | GENO_2DF | 1744 | NA     | NA    | NA      | NA     | 10.48 | 5.30E-03 |
|  | HFE | rs1800702 | G | HOM      | 1744 | 2.211  | 0.706 | 0.826   | 3.595  | 3.13  | 1.78E-03 |
|  | HFE | rs1800702 | G | HET      | 1744 | 0.351  | 0.518 | -0.664  | 1.367  | 0.68  | 4.98E-01 |
|  | HFE | rs1800702 | G | GENO_2DF | 1744 | NA     | NA    | NA      | NA     | 10.48 | 5.30E-03 |
|  | HFE | rs2794720 | C | HOM      | 1744 | 2.211  | 0.706 | 0.826   | 3.595  | 3.13  | 1.78E-03 |
|  | HFE | rs2794720 | C | HET      | 1744 | 0.351  | 0.518 | -0.664  | 1.367  | 0.68  | 4.98E-01 |
|  | HFE | rs2794720 | C | GENO_2DF | 1744 | NA     | NA    | NA      | NA     | 10.48 | 5.30E-03 |
|  | HFE | rs2794719 | G | HOM      | 1744 | 2.211  | 0.706 | 0.826   | 3.595  | 3.13  | 1.78E-03 |
|  | HFE | rs2794719 | G | HET      | 1744 | 0.351  | 0.518 | -0.664  | 1.367  | 0.68  | 4.98E-01 |
|  | HFE | rs2794719 | G | GENO_2DF | 1744 | NA     | NA    | NA      | NA     | 10.48 | 5.30E-03 |
|  | HFE | rs9366637 | T | HOM      | 1804 | -9.085 | 3.639 | -16.220 | -1.952 | -2.50 | 1.26E-02 |
|  | HFE | rs9366637 | T | HET      | 1804 | -0.694 | 0.739 | -2.143  | 0.754  | -0.94 | 3.48E-01 |
|  | HFE | rs9366637 | T | GENO_2DF | 1804 | NA     | NA    | NA      | NA     | 7.01  | 3.01E-02 |
|  | HFE | rs1799945 | G | HOM      | 1755 | 3.906  | 1.321 | 1.317   | 6.494  | 2.96  | 3.15E-03 |
|  | HFE | rs1799945 | G | HET      | 1755 | 2.682  | 0.538 | 1.628   | 3.736  | 4.99  | 6.78E-07 |
|  | HFE | rs1799945 | G | GENO_2DF | 1755 | NA     | NA    | NA      | NA     | 30.87 | 1.98E-07 |
|  | HFE | rs2071303 | C | HOM      | 1804 | 1.996  | 0.742 | 0.542   | 3.450  | 2.69  | 7.19E-03 |
|  | HFE | rs2071303 | C | HET      | 1804 | 1.481  | 0.487 | 0.526   | 2.436  | 3.04  | 2.40E-03 |
|  | HFE | rs2071303 | C | GENO_2DF | 1804 | NA     | NA    | NA      | NA     | 12.21 | 2.23E-03 |
|  | HFE | rs1800562 | A | HOM      | 1804 | NA     | NA    | NA      | NA     | NA    | NA       |
|  | HFE | rs1800562 | A | HET      | 1804 | NA     | NA    | NA      | NA     | NA    | NA       |
|  | HFE | rs1800562 | A | GENO_2DF | 1804 | NA     | NA    | NA      | NA     | NA    | NA       |
|  | HFE | rs1800708 | C | HOM      | 1803 | -9.017 | 3.927 | -16.710 | -1.320 | -2.30 | 2.18E-02 |
|  | HFE | rs1800708 | C | HET      | 1803 | -1.113 | 0.725 | -2.535  | 0.308  | -1.54 | 1.25E-01 |
|  | HFE | rs1800708 | C | GENO_2DF | 1803 | NA     | NA    | NA      | NA     | 7.47  | 2.38E-02 |
|  | HFE | rs2858996 | T | HOM      | 1803 | -1.677 | 1.333 | -4.290  | 0.936  | -1.26 | 2.09E-01 |
|  | HFE | rs2858996 | T | HET      | 1803 | -0.311 | 0.540 | -1.369  | 0.747  | -0.58 | 5.65E-01 |
|  | HFE | rs2858996 | T | GENO_2DF | 1803 | NA     | NA    | NA      | NA     | 1.65  | 4.38E-01 |
|  | HFE | rs1572982 | A | HOM      | 1804 | 1.892  | 0.672 | 0.575   | 3.209  | 2.82  | 4.92E-03 |
|  | HFE | rs1572982 | A | HET      | 1804 | 1.203  | 0.536 | 0.152   | 2.255  | 2.24  | 2.50E-02 |
|  | HFE | rs1572982 | A | GENO_2DF | 1804 | NA     | NA    | NA      | NA     | 8.69  | 1.30E-02 |
|  | HFE | rs707889  | A | HOM      | 1804 | -1.683 | 1.333 | -4.295  | 0.929  | -1.26 | 2.07E-01 |
|  | HFE | rs707889  | A | HET      | 1804 | -0.311 | 0.540 | -1.368  | 0.747  | -0.58 | 5.65E-01 |

|  |     |            |   |          |      |        |       |         |        |       |          |
|--|-----|------------|---|----------|------|--------|-------|---------|--------|-------|----------|
|  | HFE | rs707889   | A | GENO_2DF | 1804 | NA     | NA    | NA      | NA     | 1.66  | 4.35E-01 |
|  | HFE | rs1045537  | C | HOM      | 1753 | -1.698 | 1.713 | -5.057  | 1.660  | -0.99 | 3.22E-01 |
|  | HFE | rs1045537  | C | HET      | 1753 | -0.179 | 0.554 | -1.265  | 0.908  | -0.32 | 7.47E-01 |
|  | HFE | rs1045537  | C | GENO_2DF | 1753 | NA     | NA    | NA      | NA     | 1.04  | 5.94E-01 |
|  | HFE | rs12346    | T | HOM      | 1804 | -1.180 | 0.779 | -2.707  | 0.348  | -1.51 | 1.30E-01 |
|  | HFE | rs12346    | T | HET      | 1804 | -1.090 | 0.481 | -2.032  | -0.148 | -2.27 | 2.35E-02 |
|  | HFE | rs12346    | T | GENO_2DF | 1804 | NA     | NA    | NA      | NA     | 5.81  | 5.48E-02 |
|  | HFE | rs17596719 | A | HOM      | 1802 | -0.849 | 2.170 | -5.103  | 3.405  | -0.39 | 6.96E-01 |
|  | HFE | rs17596719 | A | HET      | 1802 | -0.293 | 0.574 | -1.418  | 0.832  | -0.51 | 6.10E-01 |
|  | HFE | rs17596719 | A | GENO_2DF | 1802 | NA     | NA    | NA      | NA     | 0.39  | 8.22E-01 |
|  | HFE | rs6918586  | C | HOM      | 1801 | 2.635  | 0.691 | 1.281   | 3.989  | 3.81  | 1.41E-04 |
|  | HFE | rs6918586  | C | HET      | 1801 | 1.630  | 0.506 | 0.639   | 2.621  | 3.22  | 1.29E-03 |
|  | HFE | rs6918586  | C | GENO_2DF | 1801 | NA     | NA    | NA      | NA     | 17.47 | 1.61E-04 |
|  | HFE | rs9393685  | C | HOM      | 1797 | -9.010 | 3.923 | -16.700 | -1.322 | -2.30 | 2.17E-02 |
|  | HFE | rs9393685  | C | HET      | 1797 | -0.974 | 0.708 | -2.362  | 0.413  | -1.38 | 1.69E-01 |
|  | HFE | rs9393685  | C | GENO_2DF | 1797 | NA     | NA    | NA      | NA     | 7.03  | 2.98E-02 |
|  | HFE | rs1150659  | A | HOM      | 1802 | -1.975 | 1.321 | -4.565  | 0.615  | -1.50 | 1.35E-01 |
|  | HFE | rs1150659  | A | HET      | 1802 | -0.293 | 0.541 | -1.353  | 0.768  | -0.54 | 5.89E-01 |
|  | HFE | rs1150659  | A | GENO_2DF | 1802 | NA     | NA    | NA      | NA     | 2.26  | 3.23E-01 |
|  | HFE | rs1150660  | A | HOM      | 1804 | -1.180 | 0.779 | -2.707  | 0.348  | -1.51 | 1.30E-01 |
|  | HFE | rs1150660  | A | HET      | 1804 | -1.090 | 0.481 | -2.032  | -0.148 | -2.27 | 2.35E-02 |
|  | HFE | rs1150660  | A | GENO_2DF | 1804 | NA     | NA    | NA      | NA     | 5.81  | 5.48E-02 |
|  | HFE | rs198857   | G | HOM      | 1802 | 1.947  | 0.672 | 0.630   | 3.264  | 2.90  | 3.81E-03 |
|  | HFE | rs198857   | G | HET      | 1802 | 1.283  | 0.537 | 0.231   | 2.335  | 2.39  | 1.69E-02 |
|  | HFE | rs198857   | G | GENO_2DF | 1802 | NA     | NA    | NA      | NA     | 9.38  | 9.19E-03 |
|  | HFE | rs198856   | G | HOM      | 1802 | 1.947  | 0.672 | 0.630   | 3.264  | 2.90  | 3.81E-03 |
|  | HFE | rs198856   | G | HET      | 1802 | 1.283  | 0.537 | 0.231   | 2.335  | 2.39  | 1.69E-02 |
|  | HFE | rs198856   | G | GENO_2DF | 1802 | NA     | NA    | NA      | NA     | 9.38  | 9.19E-03 |
|  | HFE | rs1543680  | A | HOM      | 1798 | -2.007 | 1.334 | -4.621  | 0.607  | -1.51 | 1.33E-01 |
|  | HFE | rs1543680  | A | HET      | 1798 | -0.294 | 0.543 | -1.358  | 0.770  | -0.54 | 5.88E-01 |
|  | HFE | rs1543680  | A | GENO_2DF | 1798 | NA     | NA    | NA      | NA     | 2.29  | 3.18E-01 |
|  | HFE | rs198855   | A | HOM      | 1755 | 2.168  | 0.893 | 0.418   | 3.918  | 2.43  | 1.53E-02 |
|  | HFE | rs198855   | A | HET      | 1755 | 2.183  | 0.486 | 1.230   | 3.135  | 4.49  | 7.59E-06 |

|  |                |           |   |          |      |        |       |         |        |       |          |
|--|----------------|-----------|---|----------|------|--------|-------|---------|--------|-------|----------|
|  | <i>HFE</i>     | rs198855  | A | GENO_2DF | 1755 | NA     | NA    | NA      | NA     | 22.19 | 1.52E-05 |
|  | <i>HFE</i>     | rs7743957 | C | HOM      | 1797 | -9.010 | 3.923 | -16.700 | -1.322 | -2.30 | 2.17E-02 |
|  | <i>HFE</i>     | rs7743957 | C | HET      | 1797 | -0.974 | 0.708 | -2.362  | 0.413  | -1.38 | 1.69E-01 |
|  | <i>HFE</i>     | rs7743957 | C | GENO_2DF | 1797 | NA     | NA    | NA      | NA     | 7.03  | 2.98E-02 |
|  | <i>HFE</i>     | rs198854  | T | HOM      | 1803 | 1.930  | 0.671 | 0.615   | 3.246  | 2.88  | 4.08E-03 |
|  | <i>HFE</i>     | rs198854  | T | HET      | 1803 | 1.283  | 0.537 | 0.231   | 2.335  | 2.39  | 1.69E-02 |
|  | <i>HFE</i>     | rs198854  | T | GENO_2DF | 1803 | NA     | NA    | NA      | NA     | 9.28  | 9.65E-03 |
|  | <i>HFE</i>     | rs198853  | C | HOM      | 1804 | -1.180 | 0.779 | -2.707  | 0.348  | -1.51 | 1.30E-01 |
|  | <i>HFE</i>     | rs198853  | C | HET      | 1804 | -1.090 | 0.481 | -2.032  | -0.148 | -2.27 | 2.35E-02 |
|  | <i>HFE</i>     | rs198853  | C | GENO_2DF | 1804 | NA     | NA    | NA      | NA     | 5.81  | 5.48E-02 |
|  | <i>HFE</i>     | rs2229768 | C | HOM      | 1803 | -1.971 | 1.321 | -4.560  | 0.619  | -1.49 | 1.36E-01 |
|  | <i>HFE</i>     | rs2229768 | C | HET      | 1803 | -0.288 | 0.541 | -1.347  | 0.772  | -0.53 | 5.95E-01 |
|  | <i>HFE</i>     | rs2229768 | C | GENO_2DF | 1803 | NA     | NA    | NA      | NA     | 2.25  | 3.25E-01 |
|  | <i>HFE</i>     | rs198852  | G | HOM      | 1804 | -1.417 | 0.721 | -2.830  | -0.004 | -1.97 | 4.96E-02 |
|  | <i>HFE</i>     | rs198852  | G | HET      | 1804 | -1.141 | 0.507 | -2.135  | -0.146 | -2.25 | 2.47E-02 |
|  | <i>HFE</i>     | rs198852  | G | GENO_2DF | 1804 | NA     | NA    | NA      | NA     | 6.21  | 4.48E-02 |
|  | <i>HFE</i>     | rs198851  | T | HOM      | 1646 | 2.841  | 1.512 | -0.123  | 5.804  | 1.88  | 6.05E-02 |
|  | <i>HFE</i>     | rs198851  | T | HET      | 1646 | 3.104  | 0.578 | 1.972   | 4.237  | 5.37  | 8.94E-08 |
|  | <i>HFE</i>     | rs198851  | T | GENO_2DF | 1646 | NA     | NA    | NA      | NA     | 30.84 | 2.01E-07 |
|  | <i>HFE</i>     | rs198848  | T | HOM      | 1804 | -1.417 | 0.721 | -2.830  | -0.004 | -1.97 | 4.96E-02 |
|  | <i>HFE</i>     | rs198848  | T | HET      | 1804 | -1.141 | 0.507 | -2.135  | -0.146 | -2.25 | 2.47E-02 |
|  | <i>HFE</i>     | rs198848  | T | GENO_2DF | 1804 | NA     | NA    | NA      | NA     | 6.21  | 4.48E-02 |
|  | <i>TMPRSS6</i> | rs2235320 | T | HOM      | 1803 | -2.842 | 1.920 | -6.604  | 0.921  | -1.48 | 1.39E-01 |
|  | <i>TMPRSS6</i> | rs2235320 | T | HET      | 1803 | -0.949 | 0.575 | -2.077  | 0.178  | -1.65 | 9.90E-02 |
|  | <i>TMPRSS6</i> | rs2235320 | T | GENO_2DF | 1803 | NA     | NA    | NA      | NA     | 4.42  | 1.10E-01 |
|  | <i>TMPRSS6</i> | rs2235321 | A | HOM      | 1560 | -1.733 | 1.102 | -3.893  | 0.427  | -1.57 | 1.16E-01 |
|  | <i>TMPRSS6</i> | rs2235321 | A | HET      | 1560 | -1.129 | 0.672 | -2.447  | 0.189  | -1.68 | 9.32E-02 |
|  | <i>TMPRSS6</i> | rs2235321 | A | GENO_2DF | 1560 | NA     | NA    | NA      | NA     | 3.51  | 1.73E-01 |
|  | <i>TMPRSS6</i> | rs855791  | A | HOM      | 1804 | NA     | NA    | NA      | NA     | NA    | NA       |
|  | <i>TMPRSS6</i> | rs855791  | A | HET      | 1804 | NA     | NA    | NA      | NA     | NA    | NA       |
|  | <i>TMPRSS6</i> | rs855791  | A | GENO_2DF | 1804 | NA     | NA    | NA      | NA     | NA    | NA       |
|  | <i>TMPRSS6</i> | rs5756504 | T | HOM      | 1603 | -1.978 | 1.056 | -4.047  | 0.092  | -1.87 | 6.12E-02 |
|  | <i>TMPRSS6</i> | rs5756504 | T | HET      | 1603 | -0.505 | 0.632 | -1.743  | 0.734  | -0.80 | 4.25E-01 |

|  |                |            |   |          |      |        |       |        |        |       |          |
|--|----------------|------------|---|----------|------|--------|-------|--------|--------|-------|----------|
|  | <i>TMPRSS6</i> | rs5756504  | T | GENO_2DF | 1603 | NA     | NA    | NA     | NA     | 3.53  | 1.72E-01 |
|  | <i>TMPRSS6</i> | rs5756505  | C | HOM      | 1647 | -1.635 | 1.049 | -3.691 | 0.422  | -1.56 | 1.19E-01 |
|  | <i>TMPRSS6</i> | rs5756505  | C | HET      | 1647 | -0.543 | 0.668 | -1.852 | 0.767  | -0.81 | 4.17E-01 |
|  | <i>TMPRSS6</i> | rs5756505  | C | GENO_2DF | 1647 | NA     | NA    | NA     | NA     | 2.43  | 2.97E-01 |
|  | <i>TMPRSS6</i> | rs5756506  | C | HOM      | 1635 | -1.566 | 1.045 | -3.614 | 0.483  | -1.50 | 1.34E-01 |
|  | <i>TMPRSS6</i> | rs5756506  | C | HET      | 1635 | -0.568 | 0.634 | -1.811 | 0.676  | -0.89 | 3.71E-01 |
|  | <i>TMPRSS6</i> | rs5756506  | C | GENO_2DF | 1635 | NA     | NA    | NA     | NA     | 2.28  | 3.20E-01 |
|  | <i>TMPRSS6</i> | rs4820268  | G | HOM      | 1799 | -0.748 | 1.591 | -3.867 | 2.371  | -0.47 | 6.38E-01 |
|  | <i>TMPRSS6</i> | rs4820268  | G | HET      | 1799 | -0.119 | 1.132 | -2.338 | 2.100  | -0.11 | 9.16E-01 |
|  | <i>TMPRSS6</i> | rs4820268  | G | GENO_2DF | 1799 | NA     | NA    | NA     | NA     | 0.31  | 8.57E-01 |
|  | <i>TMPRSS6</i> | rs13055107 | A | HOM      | 1603 | 7.358  | 2.071 | 3.300  | 11.420 | 3.55  | 3.91E-04 |
|  | <i>TMPRSS6</i> | rs13055107 | A | HET      | 1603 | -0.016 | 0.623 | -1.238 | 1.206  | -0.03 | 9.79E-01 |
|  | <i>TMPRSS6</i> | rs13055107 | A | GENO_2DF | 1603 | NA     | NA    | NA     | NA     | 12.78 | 1.68E-03 |
|  | <i>TMPRSS6</i> | rs2413450  | T | HOM      | 1719 | -0.617 | 1.649 | -3.849 | 2.615  | -0.37 | 7.08E-01 |
|  | <i>TMPRSS6</i> | rs2413450  | T | HET      | 1719 | -0.067 | 1.159 | -2.339 | 2.205  | -0.06 | 9.54E-01 |
|  | <i>TMPRSS6</i> | rs2413450  | T | GENO_2DF | 1719 | NA     | NA    | NA     | NA     | 0.21  | 9.01E-01 |
|  | <i>TMPRSS6</i> | rs855789   | C | HOM      | 1799 | 9.239  | 6.860 | -4.207 | 22.680 | 1.35  | 1.78E-01 |
|  | <i>TMPRSS6</i> | rs855789   | C | HET      | 1799 | -0.858 | 0.794 | -2.413 | 0.698  | -1.08 | 2.80E-01 |
|  | <i>TMPRSS6</i> | rs855789   | C | GENO_2DF | 1799 | NA     | NA    | NA     | NA     | 3.04  | 2.19E-01 |
|  | <i>TMPRSS6</i> | rs855788   | A | HOM      | 1803 | -0.060 | 0.804 | -1.636 | 1.516  | -0.07 | 9.41E-01 |
|  | <i>TMPRSS6</i> | rs855788   | A | HET      | 1803 | 0.265  | 0.531 | -0.775 | 1.305  | 0.50  | 6.18E-01 |
|  | <i>TMPRSS6</i> | rs855788   | A | GENO_2DF | 1803 | NA     | NA    | NA     | NA     | 0.37  | 8.33E-01 |
|  | <i>TMPRSS6</i> | rs17750017 | A | HOM      | 1790 | NA     | NA    | NA     | NA     | NA    | NA       |
|  | <i>TMPRSS6</i> | rs17750017 | A | HET      | 1790 | NA     | NA    | NA     | NA     | NA    | NA       |
|  | <i>TMPRSS6</i> | rs17750017 | A | GENO_2DF | 1790 | NA     | NA    | NA     | NA     | NA    | NA       |
|  | <i>TMPRSS6</i> | rs2743820  | C | HOM      | 1575 | -0.322 | 0.860 | -2.008 | 1.365  | -0.37 | 7.09E-01 |
|  | <i>TMPRSS6</i> | rs2743820  | C | HET      | 1575 | 0.440  | 0.548 | -0.634 | 1.513  | 0.80  | 4.22E-01 |
|  | <i>TMPRSS6</i> | rs2743820  | C | GENO_2DF | 1575 | NA     | NA    | NA     | NA     | 1.24  | 5.38E-01 |
|  | <i>TMPRSS6</i> | rs1005478  | A | HOM      | 1535 | 0.035  | 0.768 | -1.470 | 1.539  | 0.05  | 9.64E-01 |
|  | <i>TMPRSS6</i> | rs1005478  | A | HET      | 1535 | 0.266  | 0.525 | -0.763 | 1.295  | 0.51  | 6.13E-01 |
|  | <i>TMPRSS6</i> | rs1005478  | A | GENO_2DF | 1535 | NA     | NA    | NA     | NA     | 0.28  | 8.71E-01 |
|  | <i>TMPRSS6</i> | rs7286184  | G | HOM      | 1544 | -1.402 | 1.183 | -3.721 | 0.917  | -1.19 | 2.36E-01 |
|  | <i>TMPRSS6</i> | rs7286184  | G | HET      | 1544 | -0.431 | 0.564 | -1.537 | 0.676  | -0.76 | 4.45E-01 |

|  |                |           |   |          |      |        |       |        |       |       |          |
|--|----------------|-----------|---|----------|------|--------|-------|--------|-------|-------|----------|
|  | <i>TMPRSS6</i> | rs7286184 | G | GENO_2DF | 1544 | NA     | NA    | NA     | NA    | 1.64  | 4.40E-01 |
|  | <i>TMPRSS6</i> | rs2246092 | G | HOM      | 1534 | 0.156  | 0.762 | -1.339 | 1.650 | 0.20  | 8.38E-01 |
|  | <i>TMPRSS6</i> | rs2246092 | G | HET      | 1534 | 0.291  | 0.526 | -0.739 | 1.321 | 0.55  | 5.80E-01 |
|  | <i>TMPRSS6</i> | rs2246092 | G | GENO_2DF | 1534 | NA     | NA    | NA     | NA    | 0.31  | 8.58E-01 |
|  | <i>TMPRSS6</i> | rs2543519 | G | HOM      | 1559 | -0.925 | 1.037 | -2.957 | 1.107 | -0.89 | 3.72E-01 |
|  | <i>TMPRSS6</i> | rs2543519 | G | HET      | 1559 | -0.305 | 0.542 | -1.367 | 0.757 | -0.56 | 5.74E-01 |
|  | <i>TMPRSS6</i> | rs2543519 | G | GENO_2DF | 1559 | NA     | NA    | NA     | NA    | 0.91  | 6.34E-01 |
|  | <i>TMPRSS6</i> | rs2111833 | T | HOM      | 1598 | -0.190 | 0.851 | -1.858 | 1.477 | -0.22 | 8.23E-01 |
|  | <i>TMPRSS6</i> | rs2111833 | T | HET      | 1598 | 0.381  | 0.541 | -0.680 | 1.441 | 0.70  | 4.82E-01 |
|  | <i>TMPRSS6</i> | rs2111833 | T | GENO_2DF | 1598 | NA     | NA    | NA     | NA    | 0.80  | 6.69E-01 |
|  | <i>TMPRSS6</i> | rs2179229 | G | HOM      | 1550 | 0.261  | 0.755 | -1.219 | 1.740 | 0.35  | 7.30E-01 |
|  | <i>TMPRSS6</i> | rs2179229 | G | HET      | 1550 | 0.318  | 0.523 | -0.706 | 1.343 | 0.61  | 5.43E-01 |
|  | <i>TMPRSS6</i> | rs2179229 | G | GENO_2DF | 1550 | NA     | NA    | NA     | NA    | 0.39  | 8.24E-01 |
|  | <i>TMPRSS6</i> | rs2235323 | C | HOM      | 1801 | 0.368  | 0.768 | -1.137 | 1.874 | 0.48  | 6.32E-01 |
|  | <i>TMPRSS6</i> | rs2235323 | C | HET      | 1801 | 0.673  | 0.511 | -0.328 | 1.673 | 1.32  | 1.88E-01 |
|  | <i>TMPRSS6</i> | rs2235323 | C | GENO_2DF | 1801 | NA     | NA    | NA     | NA    | 1.74  | 4.18E-01 |
|  | <i>TMPRSS6</i> | rs2235324 | C | HOM      | 1803 | 0.354  | 0.767 | -1.149 | 1.857 | 0.46  | 6.44E-01 |
|  | <i>TMPRSS6</i> | rs2235324 | C | HET      | 1803 | 0.657  | 0.510 | -0.343 | 1.656 | 1.29  | 1.98E-01 |
|  | <i>TMPRSS6</i> | rs2235324 | C | GENO_2DF | 1803 | NA     | NA    | NA     | NA    | 1.67  | 4.35E-01 |
|  | <i>TMPRSS6</i> | rs736852  | C | HOM      | 1790 | 0.366  | 0.757 | -1.117 | 1.848 | 0.48  | 6.29E-01 |
|  | <i>TMPRSS6</i> | rs736852  | C | HET      | 1790 | 0.846  | 0.527 | -0.187 | 1.878 | 1.61  | 1.09E-01 |
|  | <i>TMPRSS6</i> | rs736852  | C | GENO_2DF | 1790 | NA     | NA    | NA     | NA    | 2.67  | 2.63E-01 |
|  | <i>TMPRSS6</i> | rs2019848 | A | HOM      | 1739 | -2.025 | 1.104 | -4.189 | 0.139 | -1.83 | 6.68E-02 |
|  | <i>TMPRSS6</i> | rs2019848 | A | HET      | 1739 | -0.350 | 0.535 | -1.399 | 0.699 | -0.65 | 5.13E-01 |
|  | <i>TMPRSS6</i> | rs2019848 | A | GENO_2DF | 1739 | NA     | NA    | NA     | NA    | 3.40  | 1.83E-01 |
|  | <i>TMPRSS6</i> | rs1421312 | G | HOM      | 1803 | 0.478  | 0.761 | -1.013 | 1.969 | 0.63  | 5.30E-01 |
|  | <i>TMPRSS6</i> | rs1421312 | G | HET      | 1803 | 0.734  | 0.513 | -0.271 | 1.739 | 1.43  | 1.52E-01 |
|  | <i>TMPRSS6</i> | rs1421312 | G | GENO_2DF | 1803 | NA     | NA    | NA     | NA    | 2.05  | 3.59E-01 |
|  | <i>TMPRSS6</i> | rs2543514 | C | HOM      | 1795 | 0.358  | 0.755 | -1.121 | 1.837 | 0.47  | 6.35E-01 |
|  | <i>TMPRSS6</i> | rs2543514 | C | HET      | 1795 | 0.837  | 0.525 | -0.193 | 1.866 | 1.59  | 1.11E-01 |
|  | <i>TMPRSS6</i> | rs2543514 | C | GENO_2DF | 1795 | NA     | NA    | NA     | NA    | 2.63  | 2.69E-01 |
|  | <i>TMPRSS6</i> | rs2543513 | G | HOM      | 1795 | 0.358  | 0.755 | -1.121 | 1.837 | 0.47  | 6.35E-01 |
|  | <i>TMPRSS6</i> | rs2543513 | G | HET      | 1795 | 0.837  | 0.525 | -0.193 | 1.866 | 1.59  | 1.11E-01 |

|  |                |           |   |          |      |        |       |        |        |       |          |
|--|----------------|-----------|---|----------|------|--------|-------|--------|--------|-------|----------|
|  | <i>TMPRSS6</i> | rs2543513 | G | GENO_2DF | 1795 | NA     | NA    | NA     | NA     | 2.63  | 2.69E-01 |
|  | <i>TMPRSS6</i> | rs2413451 | G | HOM      | 1795 | 0.358  | 0.755 | -1.121 | 1.837  | 0.47  | 6.35E-01 |
|  | <i>TMPRSS6</i> | rs2413451 | G | HET      | 1795 | 0.837  | 0.525 | -0.193 | 1.866  | 1.59  | 1.11E-01 |
|  | <i>TMPRSS6</i> | rs2413451 | G | GENO_2DF | 1795 | NA     | NA    | NA     | NA     | 2.63  | 2.69E-01 |
|  | <i>TMPRSS6</i> | rs2251655 | T | HOM      | 1795 | 0.358  | 0.755 | -1.121 | 1.837  | 0.47  | 6.35E-01 |
|  | <i>TMPRSS6</i> | rs2251655 | T | HET      | 1795 | 0.837  | 0.525 | -0.193 | 1.866  | 1.59  | 1.11E-01 |
|  | <i>TMPRSS6</i> | rs2251655 | T | GENO_2DF | 1795 | NA     | NA    | NA     | NA     | 2.63  | 2.69E-01 |
|  | <i>TMPRSS6</i> | rs2743824 | C | HOM      | 1793 | 0.361  | 0.755 | -1.119 | 1.840  | 0.48  | 6.33E-01 |
|  | <i>TMPRSS6</i> | rs2743824 | C | HET      | 1793 | 0.837  | 0.526 | -0.194 | 1.867  | 1.59  | 1.12E-01 |
|  | <i>TMPRSS6</i> | rs2743824 | C | GENO_2DF | 1793 | NA     | NA    | NA     | NA     | 2.62  | 2.70E-01 |
|  | <i>TMPRSS6</i> | rs2543509 | G | HOM      | 1793 | 0.361  | 0.755 | -1.119 | 1.840  | 0.48  | 6.33E-01 |
|  | <i>TMPRSS6</i> | rs2543509 | G | HET      | 1793 | 0.837  | 0.526 | -0.194 | 1.867  | 1.59  | 1.12E-01 |
|  | <i>TMPRSS6</i> | rs2543509 | G | GENO_2DF | 1793 | NA     | NA    | NA     | NA     | 2.62  | 2.70E-01 |
|  | <i>TMPRSS6</i> | rs2743825 | G | HOM      | 1792 | 0.360  | 0.755 | -1.120 | 1.841  | 0.48  | 6.33E-01 |
|  | <i>TMPRSS6</i> | rs2743825 | G | HET      | 1792 | 0.834  | 0.526 | -0.197 | 1.865  | 1.59  | 1.13E-01 |
|  | <i>TMPRSS6</i> | rs2743825 | G | GENO_2DF | 1792 | NA     | NA    | NA     | NA     | 2.60  | 2.72E-01 |
|  | <i>TMPRSS6</i> | rs2160906 | A | HOM      | 1803 | -2.445 | 1.016 | -4.435 | -0.454 | -2.41 | 1.62E-02 |
|  | <i>TMPRSS6</i> | rs2160906 | A | HET      | 1803 | -0.394 | 0.513 | -1.399 | 0.610  | -0.77 | 4.42E-01 |
|  | <i>TMPRSS6</i> | rs2160906 | A | GENO_2DF | 1803 | NA     | NA    | NA     | NA     | 5.82  | 5.45E-02 |
|  | <i>TMPRSS6</i> | rs732755  | C | HOM      | 1727 | -2.451 | 1.018 | -4.446 | -0.456 | -2.41 | 1.61E-02 |
|  | <i>TMPRSS6</i> | rs732755  | C | HET      | 1727 | -0.478 | 0.525 | -1.507 | 0.551  | -0.91 | 3.63E-01 |
|  | <i>TMPRSS6</i> | rs732755  | C | GENO_2DF | 1727 | NA     | NA    | NA     | NA     | 5.88  | 5.28E-02 |
|  | <i>TMPRSS6</i> | rs8139988 | C | HOM      | 1780 | -2.376 | 1.023 | -4.381 | -0.370 | -2.32 | 2.04E-02 |
|  | <i>TMPRSS6</i> | rs8139988 | C | HET      | 1780 | -0.355 | 0.517 | -1.369 | 0.659  | -0.69 | 4.93E-01 |
|  | <i>TMPRSS6</i> | rs8139988 | C | GENO_2DF | 1780 | NA     | NA    | NA     | NA     | 5.40  | 6.72E-02 |
|  | <i>TMPRSS6</i> | rs2017764 | A | HOM      | 1772 | 0.595  | 0.778 | -0.930 | 2.119  | 0.76  | 4.45E-01 |
|  | <i>TMPRSS6</i> | rs2017764 | A | HET      | 1772 | 0.733  | 0.517 | -0.280 | 1.747  | 1.42  | 1.56E-01 |
|  | <i>TMPRSS6</i> | rs2017764 | A | GENO_2DF | 1772 | NA     | NA    | NA     | NA     | 2.04  | 3.60E-01 |
|  | <i>TMPRSS6</i> | rs733655  | C | HOM      | 1774 | -1.853 | 0.947 | -3.708 | 0.003  | -1.96 | 5.05E-02 |
|  | <i>TMPRSS6</i> | rs733655  | C | HET      | 1774 | -0.399 | 0.514 | -1.406 | 0.608  | -0.78 | 4.37E-01 |
|  | <i>TMPRSS6</i> | rs733655  | C | GENO_2DF | 1774 | NA     | NA    | NA     | NA     | 3.90  | 1.42E-01 |
|  | <i>TMPRSS6</i> | rs2281090 | A | HOM      | 1775 | -2.364 | 1.038 | -4.398 | -0.331 | -2.28 | 2.28E-02 |
|  | <i>TMPRSS6</i> | rs2281090 | A | HET      | 1775 | -0.419 | 0.520 | -1.437 | 0.600  | -0.81 | 4.21E-01 |

|  |                |            |   |          |      |        |       |        |        |       |          |
|--|----------------|------------|---|----------|------|--------|-------|--------|--------|-------|----------|
|  | <i>TMPRSS6</i> | rs2281090  | A | GENO_2DF | 1775 | NA     | NA    | NA     | NA     | 5.25  | 7.24E-02 |
|  | <i>TMPRSS6</i> | rs2281091  | T | HOM      | 1773 | -2.323 | 1.043 | -4.367 | -0.279 | -2.23 | 2.61E-02 |
|  | <i>TMPRSS6</i> | rs2281091  | T | HET      | 1773 | -0.415 | 0.520 | -1.434 | 0.604  | -0.80 | 4.25E-01 |
|  | <i>TMPRSS6</i> | rs2281091  | T | GENO_2DF | 1773 | NA     | NA    | NA     | NA     | 5.02  | 8.12E-02 |
|  | <i>TMPRSS6</i> | rs228906   | A | HOM      | 1804 | 0.369  | 0.722 | -1.046 | 1.783  | 0.51  | 6.10E-01 |
|  | <i>TMPRSS6</i> | rs228906   | A | HET      | 1804 | 0.077  | 0.490 | -0.883 | 1.037  | 0.16  | 8.75E-01 |
|  | <i>TMPRSS6</i> | rs228906   | A | GENO_2DF | 1804 | NA     | NA    | NA     | NA     | 0.26  | 8.77E-01 |
|  | <i>TMPRSS6</i> | rs7289616  | A | HOM      | 1750 | 0.439  | 0.790 | -1.110 | 1.988  | 0.56  | 5.78E-01 |
|  | <i>TMPRSS6</i> | rs7289616  | A | HET      | 1750 | 0.729  | 0.520 | -0.290 | 1.747  | 1.40  | 1.61E-01 |
|  | <i>TMPRSS6</i> | rs7289616  | A | GENO_2DF | 1750 | NA     | NA    | NA     | NA     | 1.97  | 3.74E-01 |
|  | <i>TMPRSS6</i> | rs9619658  | T | HOM      | 1444 | -0.453 | 0.944 | -2.302 | 1.396  | -0.48 | 6.31E-01 |
|  | <i>TMPRSS6</i> | rs9619658  | T | HET      | 1444 | 0.707  | 0.559 | -0.388 | 1.802  | 1.27  | 2.06E-01 |
|  | <i>TMPRSS6</i> | rs9619658  | T | GENO_2DF | 1444 | NA     | NA    | NA     | NA     | 2.57  | 2.76E-01 |
|  | <i>TMPRSS6</i> | rs228907   | A | HOM      | 1801 | 0.206  | 0.860 | -1.480 | 1.891  | 0.24  | 8.11E-01 |
|  | <i>TMPRSS6</i> | rs228907   | A | HET      | 1801 | 0.410  | 0.484 | -0.538 | 1.357  | 0.85  | 3.97E-01 |
|  | <i>TMPRSS6</i> | rs228907   | A | GENO_2DF | 1801 | NA     | NA    | NA     | NA     | 0.72  | 6.98E-01 |
|  | <i>TMPRSS6</i> | rs17750152 | T | HOM      | 1067 | 0.157  | 1.432 | -2.650 | 2.964  | 0.11  | 9.13E-01 |
|  | <i>TMPRSS6</i> | rs17750152 | T | HET      | 1067 | 0.728  | 0.664 | -0.574 | 2.029  | 1.10  | 2.73E-01 |
|  | <i>TMPRSS6</i> | rs17750152 | T | GENO_2DF | 1067 | NA     | NA    | NA     | NA     | 1.22  | 5.43E-01 |
|  | <i>TMPRSS6</i> | rs4140590  | A | HOM      | 1570 | -0.346 | 0.746 | -1.807 | 1.116  | -0.46 | 6.43E-01 |
|  | <i>TMPRSS6</i> | rs4140590  | A | HET      | 1570 | 0.425  | 0.572 | -0.697 | 1.546  | 0.74  | 4.58E-01 |
|  | <i>TMPRSS6</i> | rs4140590  | A | GENO_2DF | 1570 | NA     | NA    | NA     | NA     | 1.51  | 4.70E-01 |
|  | <i>TMPRSS6</i> | rs4140589  | A | HOM      | 1603 | -0.363 | 0.737 | -1.808 | 1.082  | -0.49 | 6.22E-01 |
|  | <i>TMPRSS6</i> | rs4140589  | A | HET      | 1603 | 0.411  | 0.563 | -0.692 | 1.515  | 0.73  | 4.65E-01 |
|  | <i>TMPRSS6</i> | rs4140589  | A | GENO_2DF | 1603 | NA     | NA    | NA     | NA     | 1.54  | 4.64E-01 |
|  | <i>TMPRSS6</i> | rs5995380  | T | HOM      | 1681 | -1.147 | 1.320 | -3.735 | 1.440  | -0.87 | 3.85E-01 |
|  | <i>TMPRSS6</i> | rs5995380  | T | HET      | 1681 | -0.215 | 0.531 | -1.255 | 0.826  | -0.40 | 6.86E-01 |
|  | <i>TMPRSS6</i> | rs5995380  | T | GENO_2DF | 1681 | NA     | NA    | NA     | NA     | 0.84  | 6.56E-01 |
|  | <i>TMPRSS6</i> | rs11704654 | T | HOM      | 1723 | -1.491 | 1.251 | -3.944 | 0.962  | -1.19 | 2.34E-01 |
|  | <i>TMPRSS6</i> | rs11704654 | T | HET      | 1723 | -0.183 | 0.517 | -1.196 | 0.829  | -0.35 | 7.23E-01 |
|  | <i>TMPRSS6</i> | rs11704654 | T | GENO_2DF | 1723 | NA     | NA    | NA     | NA     | 1.46  | 4.82E-01 |
|  | <i>TMPRSS6</i> | rs5756515  | G | HOM      | 1684 | -0.117 | 0.721 | -1.529 | 1.296  | -0.16 | 8.71E-01 |
|  | <i>TMPRSS6</i> | rs5756515  | G | HET      | 1684 | 0.421  | 0.549 | -0.655 | 1.496  | 0.77  | 4.43E-01 |



|  |                |           |   |          |      |        |       |        |        |       |          |
|--|----------------|-----------|---|----------|------|--------|-------|--------|--------|-------|----------|
|  | <i>TMPRSS6</i> | rs5756515 | G | GENO_2DF | 1684 | NA     | NA    | NA     | NA     | 0.99  | 6.10E-01 |
|  | <i>TMPRSS6</i> | rs5756516 | T | HOM      | 1684 | -0.117 | 0.721 | -1.529 | 1.296  | -0.16 | 8.71E-01 |
|  | <i>TMPRSS6</i> | rs5756516 | T | HET      | 1684 | 0.421  | 0.549 | -0.655 | 1.496  | 0.77  | 4.43E-01 |
|  | <i>TMPRSS6</i> | rs5756516 | T | GENO_2DF | 1684 | NA     | NA    | NA     | NA     | 0.99  | 6.10E-01 |
|  | <i>TMPRSS6</i> | rs228909  | G | HOM      | 1803 | -0.107 | 1.133 | -2.328 | 2.114  | -0.09 | 9.25E-01 |
|  | <i>TMPRSS6</i> | rs228909  | G | HET      | 1803 | -0.201 | 0.499 | -1.180 | 0.778  | -0.40 | 6.87E-01 |
|  | <i>TMPRSS6</i> | rs228909  | G | GENO_2DF | 1803 | NA     | NA    | NA     | NA     | 0.16  | 9.21E-01 |
|  | <i>TMPRSS6</i> | rs228910  | A | HOM      | 1803 | 0.132  | 0.710 | -1.259 | 1.522  | 0.19  | 8.53E-01 |
|  | <i>TMPRSS6</i> | rs228910  | A | HET      | 1803 | 0.491  | 0.498 | -0.486 | 1.468  | 0.99  | 3.24E-01 |
|  | <i>TMPRSS6</i> | rs228910  | A | GENO_2DF | 1803 | NA     | NA    | NA     | NA     | 1.02  | 6.01E-01 |
|  | <i>TMPRSS6</i> | rs2235329 | C | HOM      | 1687 | -0.438 | 0.726 | -1.860 | 0.985  | -0.60 | 5.47E-01 |
|  | <i>TMPRSS6</i> | rs2235329 | C | HET      | 1687 | 0.311  | 0.545 | -0.757 | 1.379  | 0.57  | 5.68E-01 |
|  | <i>TMPRSS6</i> | rs2235329 | C | GENO_2DF | 1687 | NA     | NA    | NA     | NA     | 1.35  | 5.10E-01 |
|  | <i>TMPRSS6</i> | rs228913  | C | HOM      | 1803 | 0.831  | 1.251 | -1.620 | 3.282  | 0.66  | 5.06E-01 |
|  | <i>TMPRSS6</i> | rs228913  | C | HET      | 1803 | -0.149 | 0.502 | -1.133 | 0.834  | -0.30 | 7.66E-01 |
|  | <i>TMPRSS6</i> | rs228913  | C | GENO_2DF | 1803 | NA     | NA    | NA     | NA     | 0.59  | 7.44E-01 |
|  | <i>TMPRSS6</i> | rs228916  | C | HOM      | 1790 | 0.244  | 2.081 | -3.836 | 4.323  | 0.12  | 9.07E-01 |
|  | <i>TMPRSS6</i> | rs228916  | C | HET      | 1790 | 0.555  | 0.568 | -0.558 | 1.668  | 0.98  | 3.28E-01 |
|  | <i>TMPRSS6</i> | rs228916  | C | GENO_2DF | 1790 | NA     | NA    | NA     | NA     | 0.96  | 6.19E-01 |
|  | <i>TMPRSS6</i> | rs228918  | C | HOM      | 1802 | -0.446 | 0.669 | -1.757 | 0.866  | -0.67 | 5.06E-01 |
|  | <i>TMPRSS6</i> | rs228918  | C | HET      | 1802 | -0.259 | 0.509 | -1.257 | 0.739  | -0.51 | 6.11E-01 |
|  | <i>TMPRSS6</i> | rs228918  | C | GENO_2DF | 1802 | NA     | NA    | NA     | NA     | 0.50  | 7.79E-01 |
|  | <i>TMPRSS6</i> | rs228919  | T | HOM      | 1802 | -0.476 | 0.670 | -1.788 | 0.836  | -0.71 | 4.77E-01 |
|  | <i>TMPRSS6</i> | rs228919  | T | HET      | 1802 | -0.277 | 0.509 | -1.275 | 0.722  | -0.54 | 5.87E-01 |
|  | <i>TMPRSS6</i> | rs228919  | T | GENO_2DF | 1802 | NA     | NA    | NA     | NA     | 0.57  | 7.52E-01 |
|  | <i>TMPRSS6</i> | rs2092169 | T | HOM      | 1127 | 2.320  | 3.934 | -5.390 | 10.030 | 0.59  | 5.56E-01 |
|  | <i>TMPRSS6</i> | rs2092169 | T | HET      | 1127 | -0.265 | 0.802 | -1.837 | 1.308  | -0.33 | 7.42E-01 |
|  | <i>TMPRSS6</i> | rs2092169 | T | GENO_2DF | 1127 | NA     | NA    | NA     | NA     | 0.47  | 7.91E-01 |
|  | <i>TMPRSS6</i> | rs228921  | G | HOM      | 1801 | -0.474 | 0.670 | -1.786 | 0.839  | -0.71 | 4.79E-01 |
|  | <i>TMPRSS6</i> | rs228921  | G | HET      | 1801 | -0.282 | 0.510 | -1.281 | 0.717  | -0.55 | 5.80E-01 |
|  | <i>TMPRSS6</i> | rs228921  | G | GENO_2DF | 1801 | NA     | NA    | NA     | NA     | 0.57  | 7.51E-01 |
|  | <i>TMPRSS6</i> | rs3076475 | T | HOM      | 1065 | 0.358  | 1.442 | -2.467 | 3.184  | 0.25  | 8.04E-01 |
|  | <i>TMPRSS6</i> | rs3076475 | T | HET      | 1065 | 0.482  | 0.648 | -0.789 | 1.752  | 0.74  | 4.58E-01 |

|      |                |            |   |          |      |        |       |        |       |       |          |
|------|----------------|------------|---|----------|------|--------|-------|--------|-------|-------|----------|
|      | <i>TMPRSS6</i> | rs3076475  | T | GENO_2DF | 1065 | NA     | NA    | NA     | NA    | 0.56  | 7.55E-01 |
|      | <i>TMPRSS6</i> | rs228924   | A | HOM      | 1803 | 0.215  | 2.084 | -3.870 | 4.300 | 0.10  | 9.18E-01 |
|      | <i>TMPRSS6</i> | rs228924   | A | HET      | 1803 | 0.472  | 0.563 | -0.631 | 1.575 | 0.84  | 4.02E-01 |
|      | <i>TMPRSS6</i> | rs228924   | A | GENO_2DF | 1803 | NA     | NA    | NA     | NA    | 0.70  | 7.03E-01 |
|      | <i>TMPRSS6</i> | rs228925   | A | HOM      | 1126 | 0.303  | 1.283 | -2.213 | 2.818 | 0.24  | 8.14E-01 |
|      | <i>TMPRSS6</i> | rs228925   | A | HET      | 1126 | 0.187  | 0.614 | -1.016 | 1.390 | 0.31  | 7.60E-01 |
|      | <i>TMPRSS6</i> | rs228925   | A | GENO_2DF | 1126 | NA     | NA    | NA     | NA    | 0.13  | 9.39E-01 |
|      | <i>TMPRSS6</i> | rs5756520  | A | HOM      | 1799 | -0.477 | 0.670 | -1.789 | 0.836 | -0.71 | 4.77E-01 |
|      | <i>TMPRSS6</i> | rs5756520  | A | HET      | 1799 | -0.301 | 0.510 | -1.300 | 0.699 | -0.59 | 5.56E-01 |
|      | <i>TMPRSS6</i> | rs5756520  | A | GENO_2DF | 1799 | NA     | NA    | NA     | NA    | 0.60  | 7.41E-01 |
|      | <i>TMPRSS6</i> | rs11914132 | T | HOM      | 1804 | -1.169 | 0.949 | -3.030 | 0.691 | -1.23 | 2.18E-01 |
|      | <i>TMPRSS6</i> | rs11914132 | T | HET      | 1804 | -0.138 | 0.492 | -1.101 | 0.826 | -0.28 | 7.80E-01 |
|      | <i>TMPRSS6</i> | rs11914132 | T | GENO_2DF | 1804 | NA     | NA    | NA     | NA    | 1.52  | 4.68E-01 |
|      | <i>TMPRSS6</i> | rs738297   | C | HOM      | 1793 | 0.871  | 1.272 | -1.621 | 3.364 | 0.69  | 4.93E-01 |
|      | <i>TMPRSS6</i> | rs738297   | C | HET      | 1793 | -0.342 | 0.508 | -1.337 | 0.654 | -0.67 | 5.01E-01 |
|      | <i>TMPRSS6</i> | rs738297   | C | GENO_2DF | 1793 | NA     | NA    | NA     | NA    | 1.05  | 5.93E-01 |
|      | <i>TMPRSS6</i> | rs11089823 | C | HOM      | 1796 | -1.152 | 0.946 | -3.006 | 0.702 | -1.22 | 2.24E-01 |
|      | <i>TMPRSS6</i> | rs11089823 | C | HET      | 1796 | -0.156 | 0.491 | -1.118 | 0.806 | -0.32 | 7.51E-01 |
|      | <i>TMPRSS6</i> | rs11089823 | C | GENO_2DF | 1796 | NA     | NA    | NA     | NA    | 1.49  | 4.75E-01 |
|      | <i>TMPRSS6</i> | rs11089824 | C | HOM      | 1796 | -1.152 | 0.946 | -3.006 | 0.702 | -1.22 | 2.24E-01 |
|      | <i>TMPRSS6</i> | rs11089824 | C | HET      | 1796 | -0.156 | 0.491 | -1.118 | 0.806 | -0.32 | 7.51E-01 |
|      | <i>TMPRSS6</i> | rs11089824 | C | GENO_2DF | 1796 | NA     | NA    | NA     | NA    | 1.49  | 4.75E-01 |
| TIBC | <i>HFE</i>     | rs9295687  | C | HOM      | 1745 | -0.360 | 0.643 | -1.620 | 0.899 | -0.56 | 5.75E-01 |
|      | <i>HFE</i>     | rs9295687  | C | HET      | 1745 | 0.257  | 0.472 | -0.668 | 1.182 | 0.54  | 5.87E-01 |
|      | <i>HFE</i>     | rs9295687  | C | GENO_2DF | 1745 | NA     | NA    | NA     | NA    | 1.12  | 5.72E-01 |
|      | <i>HFE</i>     | rs4529296  | G | HOM      | 1745 | -0.360 | 0.643 | -1.620 | 0.899 | -0.56 | 5.75E-01 |
|      | <i>HFE</i>     | rs4529296  | G | HET      | 1745 | 0.257  | 0.472 | -0.668 | 1.182 | 0.54  | 5.87E-01 |
|      | <i>HFE</i>     | rs4529296  | G | GENO_2DF | 1745 | NA     | NA    | NA     | NA    | 1.12  | 5.72E-01 |
|      | <i>HFE</i>     | rs9379825  | A | HOM      | 1745 | -0.360 | 0.643 | -1.620 | 0.899 | -0.56 | 5.75E-01 |
|      | <i>HFE</i>     | rs9379825  | A | HET      | 1745 | 0.257  | 0.472 | -0.668 | 1.182 | 0.54  | 5.87E-01 |
|      | <i>HFE</i>     | rs9379825  | A | GENO_2DF | 1745 | NA     | NA    | NA     | NA    | 1.12  | 5.72E-01 |
|      | <i>HFE</i>     | rs9467672  | T | HOM      | 1745 | -0.360 | 0.643 | -1.620 | 0.899 | -0.56 | 5.75E-01 |
|      | <i>HFE</i>     | rs9467672  | T | HET      | 1745 | 0.257  | 0.472 | -0.668 | 1.182 | 0.54  | 5.87E-01 |

|  |     |           |   |          |      |        |       |        |        |       |          |
|--|-----|-----------|---|----------|------|--------|-------|--------|--------|-------|----------|
|  | HFE | rs9467672 | T | GENO_2DF | 1745 | NA     | NA    | NA     | NA     | 1.12  | 5.72E-01 |
|  | HFE | rs9295688 | A | HOM      | 1744 | -0.400 | 0.644 | -1.662 | 0.861  | -0.62 | 5.34E-01 |
|  | HFE | rs9295688 | A | HET      | 1744 | 0.255  | 0.472 | -0.670 | 1.180  | 0.54  | 5.89E-01 |
|  | HFE | rs9295688 | A | GENO_2DF | 1744 | NA     | NA    | NA     | NA     | 1.24  | 5.39E-01 |
|  | HFE | rs2006736 | T | HOM      | 1744 | -0.400 | 0.644 | -1.662 | 0.861  | -0.62 | 5.34E-01 |
|  | HFE | rs2006736 | T | HET      | 1744 | 0.255  | 0.472 | -0.670 | 1.180  | 0.54  | 5.89E-01 |
|  | HFE | rs2006736 | T | GENO_2DF | 1744 | NA     | NA    | NA     | NA     | 1.24  | 5.39E-01 |
|  | HFE | rs1800702 | G | HOM      | 1744 | -0.400 | 0.644 | -1.662 | 0.861  | -0.62 | 5.34E-01 |
|  | HFE | rs1800702 | G | HET      | 1744 | 0.255  | 0.472 | -0.670 | 1.180  | 0.54  | 5.89E-01 |
|  | HFE | rs1800702 | G | GENO_2DF | 1744 | NA     | NA    | NA     | NA     | 1.24  | 5.39E-01 |
|  | HFE | rs2794720 | C | HOM      | 1744 | -0.400 | 0.644 | -1.662 | 0.861  | -0.62 | 5.34E-01 |
|  | HFE | rs2794720 | C | HET      | 1744 | 0.255  | 0.472 | -0.670 | 1.180  | 0.54  | 5.89E-01 |
|  | HFE | rs2794720 | C | GENO_2DF | 1744 | NA     | NA    | NA     | NA     | 1.24  | 5.39E-01 |
|  | HFE | rs2794719 | G | HOM      | 1744 | -0.400 | 0.644 | -1.662 | 0.861  | -0.62 | 5.34E-01 |
|  | HFE | rs2794719 | G | HET      | 1744 | 0.255  | 0.472 | -0.670 | 1.180  | 0.54  | 5.89E-01 |
|  | HFE | rs2794719 | G | GENO_2DF | 1744 | NA     | NA    | NA     | NA     | 1.24  | 5.39E-01 |
|  | HFE | rs9366637 | T | HOM      | 1804 | 1.039  | 3.302 | -5.433 | 7.510  | 0.31  | 7.53E-01 |
|  | HFE | rs9366637 | T | HET      | 1804 | -1.362 | 0.671 | -2.676 | -0.047 | -2.03 | 4.24E-02 |
|  | HFE | rs9366637 | T | GENO_2DF | 1804 | NA     | NA    | NA     | NA     | 4.26  | 1.19E-01 |
|  | HFE | rs1799945 | G | HOM      | 1755 | -1.722 | 1.214 | -4.102 | 0.658  | -1.42 | 1.56E-01 |
|  | HFE | rs1799945 | G | HET      | 1755 | -0.901 | 0.495 | -1.870 | 0.068  | -1.82 | 6.87E-02 |
|  | HFE | rs1799945 | G | GENO_2DF | 1755 | NA     | NA    | NA     | NA     | 4.85  | 8.87E-02 |
|  | HFE | rs2071303 | C | HOM      | 1804 | -1.651 | 0.674 | -2.971 | -0.331 | -2.45 | 1.44E-02 |
|  | HFE | rs2071303 | C | HET      | 1804 | -0.944 | 0.442 | -1.811 | -0.077 | -2.13 | 3.30E-02 |
|  | HFE | rs2071303 | C | GENO_2DF | 1804 | NA     | NA    | NA     | NA     | 7.83  | 1.99E-02 |
|  | HFE | rs1800562 | A | HOM      | 1804 | NA     | NA    | NA     | NA     | NA    | NA       |
|  | HFE | rs1800562 | A | HET      | 1804 | NA     | NA    | NA     | NA     | NA    | NA       |
|  | HFE | rs1800562 | A | GENO_2DF | 1804 | NA     | NA    | NA     | NA     | NA    | NA       |
|  | HFE | rs1800708 | C | HOM      | 1803 | 1.751  | 3.567 | -5.241 | 8.742  | 0.49  | 6.24E-01 |
|  | HFE | rs1800708 | C | HET      | 1803 | -1.208 | 0.659 | -2.499 | 0.084  | -1.83 | 6.69E-02 |
|  | HFE | rs1800708 | C | GENO_2DF | 1803 | NA     | NA    | NA     | NA     | 3.64  | 1.62E-01 |
|  | HFE | rs2858996 | T | HOM      | 1803 | 3.460  | 1.206 | 1.097  | 5.823  | 2.87  | 4.15E-03 |
|  | HFE | rs2858996 | T | HET      | 1803 | 1.143  | 0.488 | 0.187  | 2.100  | 2.34  | 1.93E-02 |

|  |     |            |   |          |      |        |       |        |        |       |          |
|--|-----|------------|---|----------|------|--------|-------|--------|--------|-------|----------|
|  | HFE | rs2858996  | T | GENO_2DF | 1803 | NA     | NA    | NA     | NA     | 11.01 | 4.06E-03 |
|  | HFE | rs1572982  | A | HOM      | 1804 | -1.297 | 0.610 | -2.492 | -0.102 | -2.13 | 3.36E-02 |
|  | HFE | rs1572982  | A | HET      | 1804 | -0.791 | 0.487 | -1.745 | 0.163  | -1.63 | 1.04E-01 |
|  | HFE | rs1572982  | A | GENO_2DF | 1804 | NA     | NA    | NA     | NA     | 4.85  | 8.84E-02 |
|  | HFE | rs707889   | A | HOM      | 1804 | 3.477  | 1.205 | 1.115  | 5.839  | 2.89  | 3.96E-03 |
|  | HFE | rs707889   | A | HET      | 1804 | 1.142  | 0.488 | 0.186  | 2.098  | 2.34  | 1.94E-02 |
|  | HFE | rs707889   | A | GENO_2DF | 1804 | NA     | NA    | NA     | NA     | 11.08 | 3.93E-03 |
|  | HFE | rs1045537  | C | HOM      | 1753 | -1.136 | 1.564 | -4.201 | 1.928  | -0.73 | 4.67E-01 |
|  | HFE | rs1045537  | C | HET      | 1753 | -0.069 | 0.506 | -1.061 | 0.922  | -0.14 | 8.91E-01 |
|  | HFE | rs1045537  | C | GENO_2DF | 1753 | NA     | NA    | NA     | NA     | 0.53  | 7.65E-01 |
|  | HFE | rs12346    | T | HOM      | 1804 | -0.422 | 0.707 | -1.809 | 0.964  | -0.60 | 5.51E-01 |
|  | HFE | rs12346    | T | HET      | 1804 | 0.289  | 0.436 | -0.567 | 1.144  | 0.66  | 5.09E-01 |
|  | HFE | rs12346    | T | GENO_2DF | 1804 | NA     | NA    | NA     | NA     | 1.18  | 5.55E-01 |
|  | HFE | rs17596719 | A | HOM      | 1802 | 2.149  | 1.964 | -1.700 | 5.999  | 1.09  | 2.74E-01 |
|  | HFE | rs17596719 | A | HET      | 1802 | 0.289  | 0.520 | -0.730 | 1.307  | 0.56  | 5.79E-01 |
|  | HFE | rs17596719 | A | GENO_2DF | 1802 | NA     | NA    | NA     | NA     | 1.44  | 4.87E-01 |
|  | HFE | rs6918586  | C | HOM      | 1801 | -0.939 | 0.629 | -2.172 | 0.294  | -1.49 | 1.36E-01 |
|  | HFE | rs6918586  | C | HET      | 1801 | -0.460 | 0.460 | -1.362 | 0.442  | -1.00 | 3.18E-01 |
|  | HFE | rs6918586  | C | GENO_2DF | 1801 | NA     | NA    | NA     | NA     | 2.37  | 3.06E-01 |
|  | HFE | rs9393685  | C | HOM      | 1797 | 1.743  | 3.569 | -5.251 | 8.738  | 0.49  | 6.25E-01 |
|  | HFE | rs9393685  | C | HET      | 1797 | -1.106 | 0.644 | -2.368 | 0.156  | -1.72 | 8.60E-02 |
|  | HFE | rs9393685  | C | GENO_2DF | 1797 | NA     | NA    | NA     | NA     | 3.23  | 1.99E-01 |
|  | HFE | rs1150659  | A | HOM      | 1802 | 3.560  | 1.195 | 1.217  | 5.903  | 2.98  | 2.94E-03 |
|  | HFE | rs1150659  | A | HET      | 1802 | 1.152  | 0.489 | 0.193  | 2.111  | 2.36  | 1.87E-02 |
|  | HFE | rs1150659  | A | GENO_2DF | 1802 | NA     | NA    | NA     | NA     | 11.59 | 3.04E-03 |
|  | HFE | rs1150660  | A | HOM      | 1804 | -0.422 | 0.707 | -1.809 | 0.964  | -0.60 | 5.51E-01 |
|  | HFE | rs1150660  | A | HET      | 1804 | 0.289  | 0.436 | -0.567 | 1.144  | 0.66  | 5.09E-01 |
|  | HFE | rs1150660  | A | GENO_2DF | 1804 | NA     | NA    | NA     | NA     | 1.18  | 5.55E-01 |
|  | HFE | rs198857   | G | HOM      | 1802 | -1.319 | 0.610 | -2.515 | -0.124 | -2.16 | 3.07E-02 |
|  | HFE | rs198857   | G | HET      | 1802 | -0.815 | 0.487 | -1.770 | 0.140  | -1.67 | 9.45E-02 |
|  | HFE | rs198857   | G | GENO_2DF | 1802 | NA     | NA    | NA     | NA     | 5.05  | 8.02E-02 |
|  | HFE | rs198856   | G | HOM      | 1802 | -1.319 | 0.610 | -2.515 | -0.124 | -2.16 | 3.07E-02 |
|  | HFE | rs198856   | G | HET      | 1802 | -0.815 | 0.487 | -1.770 | 0.140  | -1.67 | 9.45E-02 |

|  |                |           |   |          |      |        |       |        |        |       |          |
|--|----------------|-----------|---|----------|------|--------|-------|--------|--------|-------|----------|
|  | <i>HFE</i>     | rs198856  | G | GENO_2DF | 1802 | NA     | NA    | NA     | NA     | 5.05  | 8.02E-02 |
|  | <i>HFE</i>     | rs1543680 | A | HOM      | 1798 | 3.361  | 1.206 | 0.998  | 5.724  | 2.79  | 5.36E-03 |
|  | <i>HFE</i>     | rs1543680 | A | HET      | 1798 | 1.186  | 0.491 | 0.225  | 2.148  | 2.42  | 1.57E-02 |
|  | <i>HFE</i>     | rs1543680 | A | GENO_2DF | 1798 | NA     | NA    | NA     | NA     | 10.89 | 4.32E-03 |
|  | <i>HFE</i>     | rs198855  | A | HOM      | 1755 | -0.637 | 0.819 | -2.243 | 0.969  | -0.78 | 4.37E-01 |
|  | <i>HFE</i>     | rs198855  | A | HET      | 1755 | -0.493 | 0.446 | -1.367 | 0.381  | -1.11 | 2.69E-01 |
|  | <i>HFE</i>     | rs198855  | A | GENO_2DF | 1755 | NA     | NA    | NA     | NA     | 1.51  | 4.70E-01 |
|  | <i>HFE</i>     | rs7743957 | C | HOM      | 1797 | 1.743  | 3.569 | -5.251 | 8.738  | 0.49  | 6.25E-01 |
|  | <i>HFE</i>     | rs7743957 | C | HET      | 1797 | -1.106 | 0.644 | -2.368 | 0.156  | -1.72 | 8.60E-02 |
|  | <i>HFE</i>     | rs7743957 | C | GENO_2DF | 1797 | NA     | NA    | NA     | NA     | 3.23  | 1.99E-01 |
|  | <i>HFE</i>     | rs198854  | T | HOM      | 1803 | -1.331 | 0.610 | -2.525 | -0.136 | -2.18 | 2.91E-02 |
|  | <i>HFE</i>     | rs198854  | T | HET      | 1803 | -0.815 | 0.487 | -1.770 | 0.140  | -1.67 | 9.44E-02 |
|  | <i>HFE</i>     | rs198854  | T | GENO_2DF | 1803 | NA     | NA    | NA     | NA     | 5.12  | 7.72E-02 |
|  | <i>HFE</i>     | rs198853  | C | HOM      | 1804 | -0.422 | 0.707 | -1.809 | 0.964  | -0.60 | 5.51E-01 |
|  | <i>HFE</i>     | rs198853  | C | HET      | 1804 | 0.289  | 0.436 | -0.567 | 1.144  | 0.66  | 5.09E-01 |
|  | <i>HFE</i>     | rs198853  | C | GENO_2DF | 1804 | NA     | NA    | NA     | NA     | 1.18  | 5.55E-01 |
|  | <i>HFE</i>     | rs2229768 | C | HOM      | 1803 | 3.564  | 1.195 | 1.222  | 5.906  | 2.98  | 2.90E-03 |
|  | <i>HFE</i>     | rs2229768 | C | HET      | 1803 | 1.156  | 0.489 | 0.198  | 2.115  | 2.36  | 1.82E-02 |
|  | <i>HFE</i>     | rs2229768 | C | GENO_2DF | 1803 | NA     | NA    | NA     | NA     | 11.65 | 2.96E-03 |
|  | <i>HFE</i>     | rs198852  | G | HOM      | 1804 | -0.292 | 0.655 | -1.576 | 0.991  | -0.45 | 6.55E-01 |
|  | <i>HFE</i>     | rs198852  | G | HET      | 1804 | 0.173  | 0.461 | -0.730 | 1.076  | 0.38  | 7.07E-01 |
|  | <i>HFE</i>     | rs198852  | G | GENO_2DF | 1804 | NA     | NA    | NA     | NA     | 0.61  | 7.37E-01 |
|  | <i>HFE</i>     | rs198851  | T | HOM      | 1646 | -1.864 | 1.374 | -4.558 | 0.829  | -1.36 | 1.75E-01 |
|  | <i>HFE</i>     | rs198851  | T | HET      | 1646 | -1.052 | 0.525 | -2.082 | -0.022 | -2.00 | 4.54E-02 |
|  | <i>HFE</i>     | rs198851  | T | GENO_2DF | 1646 | NA     | NA    | NA     | NA     | 5.41  | 6.68E-02 |
|  | <i>HFE</i>     | rs198848  | T | HOM      | 1804 | -0.292 | 0.655 | -1.576 | 0.991  | -0.45 | 6.55E-01 |
|  | <i>HFE</i>     | rs198848  | T | HET      | 1804 | 0.173  | 0.461 | -0.730 | 1.076  | 0.38  | 7.07E-01 |
|  | <i>HFE</i>     | rs198848  | T | GENO_2DF | 1804 | NA     | NA    | NA     | NA     | 0.61  | 7.37E-01 |
|  | <i>TMPRSS6</i> | rs2235320 | T | HOM      | 1803 | 0.066  | 1.745 | -3.354 | 3.486  | 0.04  | 9.70E-01 |
|  | <i>TMPRSS6</i> | rs2235320 | T | HET      | 1803 | 0.319  | 0.523 | -0.706 | 1.344  | 0.61  | 5.42E-01 |
|  | <i>TMPRSS6</i> | rs2235320 | T | GENO_2DF | 1803 | NA     | NA    | NA     | NA     | 0.37  | 8.30E-01 |
|  | <i>TMPRSS6</i> | rs2235321 | A | HOM      | 1560 | -0.309 | 1.021 | -2.311 | 1.692  | -0.30 | 7.62E-01 |
|  | <i>TMPRSS6</i> | rs2235321 | A | HET      | 1560 | -0.584 | 0.623 | -1.805 | 0.638  | -0.94 | 3.49E-01 |

|  |                |            |   |          |      |        |       |        |        |       |          |
|--|----------------|------------|---|----------|------|--------|-------|--------|--------|-------|----------|
|  | <i>TMPRSS6</i> | rs2235321  | A | GENO_2DF | 1560 | NA     | NA    | NA     | NA     | 0.92  | 6.32E-01 |
|  | <i>TMPRSS6</i> | rs855791   | A | HOM      | 1804 | NA     | NA    | NA     | NA     | NA    | NA       |
|  | <i>TMPRSS6</i> | rs855791   | A | HET      | 1804 | NA     | NA    | NA     | NA     | NA    | NA       |
|  | <i>TMPRSS6</i> | rs855791   | A | GENO_2DF | 1804 | NA     | NA    | NA     | NA     | NA    | NA       |
|  | <i>TMPRSS6</i> | rs5756504  | T | HOM      | 1603 | -0.011 | 0.976 | -1.923 | 1.902  | -0.01 | 9.91E-01 |
|  | <i>TMPRSS6</i> | rs5756504  | T | HET      | 1603 | -0.494 | 0.584 | -1.638 | 0.651  | -0.85 | 3.98E-01 |
|  | <i>TMPRSS6</i> | rs5756504  | T | GENO_2DF | 1603 | NA     | NA    | NA     | NA     | 0.92  | 6.30E-01 |
|  | <i>TMPRSS6</i> | rs5756505  | C | HOM      | 1647 | -0.043 | 0.960 | -1.925 | 1.840  | -0.04 | 9.65E-01 |
|  | <i>TMPRSS6</i> | rs5756505  | C | HET      | 1647 | -0.863 | 0.612 | -2.062 | 0.336  | -1.41 | 1.58E-01 |
|  | <i>TMPRSS6</i> | rs5756505  | C | GENO_2DF | 1647 | NA     | NA    | NA     | NA     | 2.71  | 2.57E-01 |
|  | <i>TMPRSS6</i> | rs5756506  | C | HOM      | 1635 | -0.250 | 0.954 | -2.119 | 1.620  | -0.26 | 7.94E-01 |
|  | <i>TMPRSS6</i> | rs5756506  | C | HET      | 1635 | -0.579 | 0.579 | -1.714 | 0.556  | -1.00 | 3.17E-01 |
|  | <i>TMPRSS6</i> | rs5756506  | C | GENO_2DF | 1635 | NA     | NA    | NA     | NA     | 1.07  | 5.85E-01 |
|  | <i>TMPRSS6</i> | rs4820268  | G | HOM      | 1799 | -0.383 | 1.440 | -3.206 | 2.440  | -0.27 | 7.90E-01 |
|  | <i>TMPRSS6</i> | rs4820268  | G | HET      | 1799 | -0.800 | 1.025 | -2.808 | 1.208  | -0.78 | 4.35E-01 |
|  | <i>TMPRSS6</i> | rs4820268  | G | GENO_2DF | 1799 | NA     | NA    | NA     | NA     | 0.74  | 6.90E-01 |
|  | <i>TMPRSS6</i> | rs13055107 | A | HOM      | 1603 | -2.668 | 1.924 | -6.439 | 1.103  | -1.39 | 1.66E-01 |
|  | <i>TMPRSS6</i> | rs13055107 | A | HET      | 1603 | 1.100  | 0.579 | -0.036 | 2.235  | 1.90  | 5.78E-02 |
|  | <i>TMPRSS6</i> | rs13055107 | A | GENO_2DF | 1603 | NA     | NA    | NA     | NA     | 6.12  | 4.69E-02 |
|  | <i>TMPRSS6</i> | rs2413450  | T | HOM      | 1719 | -0.947 | 1.500 | -3.887 | 1.993  | -0.63 | 5.28E-01 |
|  | <i>TMPRSS6</i> | rs2413450  | T | HET      | 1719 | -1.216 | 1.054 | -3.283 | 0.851  | -1.15 | 2.49E-01 |
|  | <i>TMPRSS6</i> | rs2413450  | T | GENO_2DF | 1719 | NA     | NA    | NA     | NA     | 1.37  | 5.05E-01 |
|  | <i>TMPRSS6</i> | rs855789   | C | HOM      | 1799 | 5.497  | 6.214 | -6.682 | 17.680 | 0.88  | 3.77E-01 |
|  | <i>TMPRSS6</i> | rs855789   | C | HET      | 1799 | 0.249  | 0.719 | -1.160 | 1.657  | 0.35  | 7.30E-01 |
|  | <i>TMPRSS6</i> | rs855789   | C | GENO_2DF | 1799 | NA     | NA    | NA     | NA     | 0.89  | 6.41E-01 |
|  | <i>TMPRSS6</i> | rs855788   | A | HOM      | 1803 | -1.123 | 0.729 | -2.552 | 0.307  | -1.54 | 1.24E-01 |
|  | <i>TMPRSS6</i> | rs855788   | A | HET      | 1803 | -0.760 | 0.481 | -1.703 | 0.183  | -1.58 | 1.14E-01 |
|  | <i>TMPRSS6</i> | rs855788   | A | GENO_2DF | 1803 | NA     | NA    | NA     | NA     | 3.34  | 1.89E-01 |
|  | <i>TMPRSS6</i> | rs17750017 | A | HOM      | 1790 | NA     | NA    | NA     | NA     | NA    | NA       |
|  | <i>TMPRSS6</i> | rs17750017 | A | HET      | 1790 | NA     | NA    | NA     | NA     | NA    | NA       |
|  | <i>TMPRSS6</i> | rs17750017 | A | GENO_2DF | 1790 | NA     | NA    | NA     | NA     | NA    | NA       |
|  | <i>TMPRSS6</i> | rs2743820  | C | HOM      | 1575 | -0.865 | 0.785 | -2.404 | 0.675  | -1.10 | 2.71E-01 |
|  | <i>TMPRSS6</i> | rs2743820  | C | HET      | 1575 | -0.547 | 0.500 | -1.527 | 0.433  | -1.09 | 2.74E-01 |

|  |                |           |   |          |      |        |       |        |       |       |          |
|--|----------------|-----------|---|----------|------|--------|-------|--------|-------|-------|----------|
|  | <i>TMPRSS6</i> | rs2743820 | C | GENO_2DF | 1575 | NA     | NA    | NA     | NA    | 1.71  | 4.26E-01 |
|  | <i>TMPRSS6</i> | rs1005478 | A | HOM      | 1535 | 0.924  | 0.703 | -0.454 | 2.302 | 1.31  | 1.89E-01 |
|  | <i>TMPRSS6</i> | rs1005478 | A | HET      | 1535 | -0.237 | 0.481 | -1.179 | 0.706 | -0.49 | 6.22E-01 |
|  | <i>TMPRSS6</i> | rs1005478 | A | GENO_2DF | 1535 | NA     | NA    | NA     | NA    | 2.78  | 2.49E-01 |
|  | <i>TMPRSS6</i> | rs7286184 | G | HOM      | 1544 | -0.574 | 1.090 | -2.711 | 1.562 | -0.53 | 5.98E-01 |
|  | <i>TMPRSS6</i> | rs7286184 | G | HET      | 1544 | 0.262  | 0.520 | -0.758 | 1.281 | 0.50  | 6.15E-01 |
|  | <i>TMPRSS6</i> | rs7286184 | G | GENO_2DF | 1544 | NA     | NA    | NA     | NA    | 0.70  | 7.03E-01 |
|  | <i>TMPRSS6</i> | rs2246092 | G | HOM      | 1534 | 1.110  | 0.700 | -0.262 | 2.482 | 1.59  | 1.13E-01 |
|  | <i>TMPRSS6</i> | rs2246092 | G | HET      | 1534 | -0.085 | 0.483 | -1.031 | 0.861 | -0.18 | 8.60E-01 |
|  | <i>TMPRSS6</i> | rs2246092 | G | GENO_2DF | 1534 | NA     | NA    | NA     | NA    | 3.17  | 2.05E-01 |
|  | <i>TMPRSS6</i> | rs2543519 | G | HOM      | 1559 | -0.448 | 0.956 | -2.323 | 1.426 | -0.47 | 6.39E-01 |
|  | <i>TMPRSS6</i> | rs2543519 | G | HET      | 1559 | 0.088  | 0.500 | -0.891 | 1.068 | 0.18  | 8.60E-01 |
|  | <i>TMPRSS6</i> | rs2543519 | G | GENO_2DF | 1559 | NA     | NA    | NA     | NA    | 0.32  | 8.53E-01 |
|  | <i>TMPRSS6</i> | rs2111833 | T | HOM      | 1598 | -1.103 | 0.771 | -2.614 | 0.408 | -1.43 | 1.53E-01 |
|  | <i>TMPRSS6</i> | rs2111833 | T | HET      | 1598 | -0.585 | 0.490 | -1.546 | 0.376 | -1.19 | 2.33E-01 |
|  | <i>TMPRSS6</i> | rs2111833 | T | GENO_2DF | 1598 | NA     | NA    | NA     | NA    | 2.50  | 2.87E-01 |
|  | <i>TMPRSS6</i> | rs2179229 | G | HOM      | 1550 | 1.064  | 0.695 | -0.298 | 2.426 | 1.53  | 1.26E-01 |
|  | <i>TMPRSS6</i> | rs2179229 | G | HET      | 1550 | -0.097 | 0.481 | -1.040 | 0.846 | -0.20 | 8.40E-01 |
|  | <i>TMPRSS6</i> | rs2179229 | G | GENO_2DF | 1550 | NA     | NA    | NA     | NA    | 3.01  | 2.22E-01 |
|  | <i>TMPRSS6</i> | rs2235323 | C | HOM      | 1801 | -0.052 | 0.698 | -1.419 | 1.316 | -0.07 | 9.41E-01 |
|  | <i>TMPRSS6</i> | rs2235323 | C | HET      | 1801 | -0.408 | 0.464 | -1.317 | 0.501 | -0.88 | 3.79E-01 |
|  | <i>TMPRSS6</i> | rs2235323 | C | GENO_2DF | 1801 | NA     | NA    | NA     | NA    | 0.88  | 6.43E-01 |
|  | <i>TMPRSS6</i> | rs2235324 | C | HOM      | 1803 | -0.103 | 0.696 | -1.468 | 1.262 | -0.15 | 8.83E-01 |
|  | <i>TMPRSS6</i> | rs2235324 | C | HET      | 1803 | -0.420 | 0.463 | -1.328 | 0.488 | -0.91 | 3.65E-01 |
|  | <i>TMPRSS6</i> | rs2235324 | C | GENO_2DF | 1803 | NA     | NA    | NA     | NA    | 0.89  | 6.41E-01 |
|  | <i>TMPRSS6</i> | rs736852  | C | HOM      | 1790 | 0.068  | 0.687 | -1.279 | 1.416 | 0.10  | 9.21E-01 |
|  | <i>TMPRSS6</i> | rs736852  | C | HET      | 1790 | -0.624 | 0.479 | -1.562 | 0.314 | -1.30 | 1.93E-01 |
|  | <i>TMPRSS6</i> | rs736852  | C | GENO_2DF | 1790 | NA     | NA    | NA     | NA    | 2.34  | 3.10E-01 |
|  | <i>TMPRSS6</i> | rs2019848 | A | HOM      | 1739 | -0.615 | 1.011 | -2.595 | 1.366 | -0.61 | 5.43E-01 |
|  | <i>TMPRSS6</i> | rs2019848 | A | HET      | 1739 | -0.057 | 0.490 | -1.017 | 0.904 | -0.12 | 9.08E-01 |
|  | <i>TMPRSS6</i> | rs2019848 | A | GENO_2DF | 1739 | NA     | NA    | NA     | NA    | 0.37  | 8.31E-01 |
|  | <i>TMPRSS6</i> | rs1421312 | G | HOM      | 1803 | -0.035 | 0.691 | -1.389 | 1.319 | -0.05 | 9.60E-01 |
|  | <i>TMPRSS6</i> | rs1421312 | G | HET      | 1803 | -0.283 | 0.466 | -1.196 | 0.629 | -0.61 | 5.43E-01 |

|  |                |           |   |          |      |        |       |        |       |       |          |
|--|----------------|-----------|---|----------|------|--------|-------|--------|-------|-------|----------|
|  | <i>TMPRSS6</i> | rs1421312 | G | GENO_2DF | 1803 | NA     | NA    | NA     | NA    | 0.43  | 8.08E-01 |
|  | <i>TMPRSS6</i> | rs2543514 | C | HOM      | 1795 | 0.055  | 0.685 | -1.288 | 1.399 | 0.08  | 9.36E-01 |
|  | <i>TMPRSS6</i> | rs2543514 | C | HET      | 1795 | -0.623 | 0.477 | -1.558 | 0.312 | -1.31 | 1.92E-01 |
|  | <i>TMPRSS6</i> | rs2543514 | C | GENO_2DF | 1795 | NA     | NA    | NA     | NA    | 2.31  | 3.15E-01 |
|  | <i>TMPRSS6</i> | rs2543513 | G | HOM      | 1795 | 0.055  | 0.685 | -1.288 | 1.399 | 0.08  | 9.36E-01 |
|  | <i>TMPRSS6</i> | rs2543513 | G | HET      | 1795 | -0.623 | 0.477 | -1.558 | 0.312 | -1.31 | 1.92E-01 |
|  | <i>TMPRSS6</i> | rs2543513 | G | GENO_2DF | 1795 | NA     | NA    | NA     | NA    | 2.31  | 3.15E-01 |
|  | <i>TMPRSS6</i> | rs2413451 | G | HOM      | 1795 | 0.055  | 0.685 | -1.288 | 1.399 | 0.08  | 9.36E-01 |
|  | <i>TMPRSS6</i> | rs2413451 | G | HET      | 1795 | -0.623 | 0.477 | -1.558 | 0.312 | -1.31 | 1.92E-01 |
|  | <i>TMPRSS6</i> | rs2413451 | G | GENO_2DF | 1795 | NA     | NA    | NA     | NA    | 2.31  | 3.15E-01 |
|  | <i>TMPRSS6</i> | rs2251655 | T | HOM      | 1795 | 0.055  | 0.685 | -1.288 | 1.399 | 0.08  | 9.36E-01 |
|  | <i>TMPRSS6</i> | rs2251655 | T | HET      | 1795 | -0.623 | 0.477 | -1.558 | 0.312 | -1.31 | 1.92E-01 |
|  | <i>TMPRSS6</i> | rs2251655 | T | GENO_2DF | 1795 | NA     | NA    | NA     | NA    | 2.31  | 3.15E-01 |
|  | <i>TMPRSS6</i> | rs2743824 | C | HOM      | 1793 | 0.057  | 0.686 | -1.287 | 1.401 | 0.08  | 9.34E-01 |
|  | <i>TMPRSS6</i> | rs2743824 | C | HET      | 1793 | -0.625 | 0.478 | -1.560 | 0.312 | -1.31 | 1.91E-01 |
|  | <i>TMPRSS6</i> | rs2743824 | C | GENO_2DF | 1793 | NA     | NA    | NA     | NA    | 2.32  | 3.13E-01 |
|  | <i>TMPRSS6</i> | rs2543509 | G | HOM      | 1793 | 0.057  | 0.686 | -1.287 | 1.401 | 0.08  | 9.34E-01 |
|  | <i>TMPRSS6</i> | rs2543509 | G | HET      | 1793 | -0.625 | 0.478 | -1.560 | 0.312 | -1.31 | 1.91E-01 |
|  | <i>TMPRSS6</i> | rs2543509 | G | GENO_2DF | 1793 | NA     | NA    | NA     | NA    | 2.32  | 3.13E-01 |
|  | <i>TMPRSS6</i> | rs2743825 | G | HOM      | 1792 | 0.057  | 0.686 | -1.287 | 1.401 | 0.08  | 9.34E-01 |
|  | <i>TMPRSS6</i> | rs2743825 | G | HET      | 1792 | -0.624 | 0.478 | -1.560 | 0.313 | -1.31 | 1.92E-01 |
|  | <i>TMPRSS6</i> | rs2743825 | G | GENO_2DF | 1792 | NA     | NA    | NA     | NA    | 2.31  | 3.15E-01 |
|  | <i>TMPRSS6</i> | rs2160906 | A | HOM      | 1803 | -0.508 | 0.923 | -2.318 | 1.301 | -0.55 | 5.82E-01 |
|  | <i>TMPRSS6</i> | rs2160906 | A | HET      | 1803 | 0.160  | 0.466 | -0.754 | 1.073 | 0.34  | 7.32E-01 |
|  | <i>TMPRSS6</i> | rs2160906 | A | GENO_2DF | 1803 | NA     | NA    | NA     | NA    | 0.55  | 7.59E-01 |
|  | <i>TMPRSS6</i> | rs732755  | C | HOM      | 1727 | -0.428 | 0.925 | -2.241 | 1.386 | -0.46 | 6.44E-01 |
|  | <i>TMPRSS6</i> | rs732755  | C | HET      | 1727 | 0.137  | 0.477 | -0.798 | 1.073 | 0.29  | 7.74E-01 |
|  | <i>TMPRSS6</i> | rs732755  | C | GENO_2DF | 1727 | NA     | NA    | NA     | NA    | 0.39  | 8.22E-01 |
|  | <i>TMPRSS6</i> | rs8139988 | C | HOM      | 1780 | -0.326 | 0.929 | -2.148 | 1.495 | -0.35 | 7.26E-01 |
|  | <i>TMPRSS6</i> | rs8139988 | C | HET      | 1780 | 0.137  | 0.470 | -0.784 | 1.058 | 0.29  | 7.71E-01 |
|  | <i>TMPRSS6</i> | rs8139988 | C | GENO_2DF | 1780 | NA     | NA    | NA     | NA    | 0.28  | 8.70E-01 |
|  | <i>TMPRSS6</i> | rs2017764 | A | HOM      | 1772 | 0.003  | 0.706 | -1.381 | 1.388 | 0.00  | 9.96E-01 |
|  | <i>TMPRSS6</i> | rs2017764 | A | HET      | 1772 | -0.265 | 0.470 | -1.185 | 0.656 | -0.56 | 5.73E-01 |



|  |                |            |   |          |      |        |       |        |       |       |          |
|--|----------------|------------|---|----------|------|--------|-------|--------|-------|-------|----------|
|  | <i>TMPRSS6</i> | rs2017764  | A | GENO_2DF | 1772 | NA     | NA    | NA     | NA    | 0.39  | 8.22E-01 |
|  | <i>TMPRSS6</i> | rs733655   | C | HOM      | 1774 | -0.368 | 0.859 | -2.052 | 1.315 | -0.43 | 6.68E-01 |
|  | <i>TMPRSS6</i> | rs733655   | C | HET      | 1774 | 0.074  | 0.466 | -0.840 | 0.987 | 0.16  | 8.74E-01 |
|  | <i>TMPRSS6</i> | rs733655   | C | GENO_2DF | 1774 | NA     | NA    | NA     | NA    | 0.26  | 8.76E-01 |
|  | <i>TMPRSS6</i> | rs2281090  | A | HOM      | 1775 | -0.377 | 0.942 | -2.223 | 1.470 | -0.40 | 6.89E-01 |
|  | <i>TMPRSS6</i> | rs2281090  | A | HET      | 1775 | 0.102  | 0.472 | -0.823 | 1.026 | 0.22  | 8.29E-01 |
|  | <i>TMPRSS6</i> | rs2281090  | A | GENO_2DF | 1775 | NA     | NA    | NA     | NA    | 0.27  | 8.75E-01 |
|  | <i>TMPRSS6</i> | rs2281091  | T | HOM      | 1773 | -0.553 | 0.946 | -2.407 | 1.301 | -0.59 | 5.59E-01 |
|  | <i>TMPRSS6</i> | rs2281091  | T | HET      | 1773 | 0.097  | 0.472 | -0.827 | 1.022 | 0.21  | 8.37E-01 |
|  | <i>TMPRSS6</i> | rs2281091  | T | GENO_2DF | 1773 | NA     | NA    | NA     | NA    | 0.48  | 7.88E-01 |
|  | <i>TMPRSS6</i> | rs228906   | A | HOM      | 1804 | 0.535  | 0.655 | -0.748 | 1.819 | 0.82  | 4.14E-01 |
|  | <i>TMPRSS6</i> | rs228906   | A | HET      | 1804 | -0.268 | 0.445 | -1.140 | 0.603 | -0.60 | 5.46E-01 |
|  | <i>TMPRSS6</i> | rs228906   | A | GENO_2DF | 1804 | NA     | NA    | NA     | NA    | 1.59  | 4.51E-01 |
|  | <i>TMPRSS6</i> | rs7289616  | A | HOM      | 1750 | 0.234  | 0.715 | -1.168 | 1.636 | 0.33  | 7.44E-01 |
|  | <i>TMPRSS6</i> | rs7289616  | A | HET      | 1750 | -0.185 | 0.470 | -1.107 | 0.737 | -0.39 | 6.95E-01 |
|  | <i>TMPRSS6</i> | rs7289616  | A | GENO_2DF | 1750 | NA     | NA    | NA     | NA    | 0.45  | 7.99E-01 |
|  | <i>TMPRSS6</i> | rs9619658  | T | HOM      | 1444 | 1.073  | 0.857 | -0.606 | 2.753 | 1.25  | 2.11E-01 |
|  | <i>TMPRSS6</i> | rs9619658  | T | HET      | 1444 | -0.038 | 0.508 | -1.033 | 0.956 | -0.08 | 9.40E-01 |
|  | <i>TMPRSS6</i> | rs9619658  | T | GENO_2DF | 1444 | NA     | NA    | NA     | NA    | 1.87  | 3.93E-01 |
|  | <i>TMPRSS6</i> | rs228907   | A | HOM      | 1801 | 0.026  | 0.781 | -1.504 | 1.556 | 0.03  | 9.74E-01 |
|  | <i>TMPRSS6</i> | rs228907   | A | HET      | 1801 | -0.245 | 0.439 | -1.105 | 0.616 | -0.56 | 5.77E-01 |
|  | <i>TMPRSS6</i> | rs228907   | A | GENO_2DF | 1801 | NA     | NA    | NA     | NA    | 0.34  | 8.44E-01 |
|  | <i>TMPRSS6</i> | rs17750152 | T | HOM      | 1067 | 0.308  | 1.335 | -2.308 | 2.925 | 0.23  | 8.18E-01 |
|  | <i>TMPRSS6</i> | rs17750152 | T | HET      | 1067 | -0.065 | 0.619 | -1.278 | 1.148 | -0.11 | 9.16E-01 |
|  | <i>TMPRSS6</i> | rs17750152 | T | GENO_2DF | 1067 | NA     | NA    | NA     | NA    | 0.08  | 9.61E-01 |
|  | <i>TMPRSS6</i> | rs4140590  | A | HOM      | 1570 | 0.446  | 0.676 | -0.880 | 1.771 | 0.66  | 5.10E-01 |
|  | <i>TMPRSS6</i> | rs4140590  | A | HET      | 1570 | -0.615 | 0.519 | -1.633 | 0.402 | -1.19 | 2.36E-01 |
|  | <i>TMPRSS6</i> | rs4140590  | A | GENO_2DF | 1570 | NA     | NA    | NA     | NA    | 3.56  | 1.68E-01 |
|  | <i>TMPRSS6</i> | rs4140589  | A | HOM      | 1603 | 0.343  | 0.670 | -0.970 | 1.655 | 0.51  | 6.09E-01 |
|  | <i>TMPRSS6</i> | rs4140589  | A | HET      | 1603 | -0.559 | 0.512 | -1.561 | 0.444 | -1.09 | 2.75E-01 |
|  | <i>TMPRSS6</i> | rs4140589  | A | GENO_2DF | 1603 | NA     | NA    | NA     | NA    | 2.72  | 2.57E-01 |
|  | <i>TMPRSS6</i> | rs5995380  | T | HOM      | 1681 | -0.505 | 1.201 | -2.858 | 1.849 | -0.42 | 6.74E-01 |
|  | <i>TMPRSS6</i> | rs5995380  | T | HET      | 1681 | -0.028 | 0.483 | -0.974 | 0.919 | -0.06 | 9.55E-01 |

|  |                |            |   |          |      |        |       |         |       |       |          |
|--|----------------|------------|---|----------|------|--------|-------|---------|-------|-------|----------|
|  | <i>TMPRSS6</i> | rs5995380  | T | GENO_2DF | 1681 | NA     | NA    | NA      | NA    | 0.18  | 9.15E-01 |
|  | <i>TMPRSS6</i> | rs11704654 | T | HOM      | 1723 | -0.812 | 1.141 | -3.048  | 1.425 | -0.71 | 4.77E-01 |
|  | <i>TMPRSS6</i> | rs11704654 | T | HET      | 1723 | 0.039  | 0.471 | -0.885  | 0.962 | 0.08  | 9.34E-01 |
|  | <i>TMPRSS6</i> | rs11704654 | T | GENO_2DF | 1723 | NA     | NA    | NA      | NA    | 0.54  | 7.64E-01 |
|  | <i>TMPRSS6</i> | rs5756515  | G | HOM      | 1684 | 0.469  | 0.651 | -0.807  | 1.745 | 0.72  | 4.71E-01 |
|  | <i>TMPRSS6</i> | rs5756515  | G | HET      | 1684 | -0.368 | 0.496 | -1.340  | 0.603 | -0.74 | 4.58E-01 |
|  | <i>TMPRSS6</i> | rs5756515  | G | GENO_2DF | 1684 | NA     | NA    | NA      | NA    | 2.15  | 3.41E-01 |
|  | <i>TMPRSS6</i> | rs5756516  | T | HOM      | 1684 | 0.469  | 0.651 | -0.807  | 1.745 | 0.72  | 4.71E-01 |
|  | <i>TMPRSS6</i> | rs5756516  | T | HET      | 1684 | -0.368 | 0.496 | -1.340  | 0.603 | -0.74 | 4.58E-01 |
|  | <i>TMPRSS6</i> | rs5756516  | T | GENO_2DF | 1684 | NA     | NA    | NA      | NA    | 2.15  | 3.41E-01 |
|  | <i>TMPRSS6</i> | rs228909   | G | HOM      | 1803 | -1.491 | 1.028 | -3.507  | 0.524 | -1.45 | 1.47E-01 |
|  | <i>TMPRSS6</i> | rs228909   | G | HET      | 1803 | 0.106  | 0.453 | -0.782  | 0.994 | 0.23  | 8.15E-01 |
|  | <i>TMPRSS6</i> | rs228909   | G | GENO_2DF | 1803 | NA     | NA    | NA      | NA    | 2.31  | 3.15E-01 |
|  | <i>TMPRSS6</i> | rs228910   | A | HOM      | 1803 | 0.205  | 0.644 | -1.058  | 1.468 | 0.32  | 7.50E-01 |
|  | <i>TMPRSS6</i> | rs228910   | A | HET      | 1803 | -0.131 | 0.453 | -1.018  | 0.756 | -0.29 | 7.72E-01 |
|  | <i>TMPRSS6</i> | rs228910   | A | GENO_2DF | 1803 | NA     | NA    | NA      | NA    | 0.30  | 8.59E-01 |
|  | <i>TMPRSS6</i> | rs2235329  | C | HOM      | 1687 | 0.495  | 0.662 | -0.803  | 1.792 | 0.75  | 4.55E-01 |
|  | <i>TMPRSS6</i> | rs2235329  | C | HET      | 1687 | -0.312 | 0.497 | -1.287  | 0.662 | -0.63 | 5.30E-01 |
|  | <i>TMPRSS6</i> | rs2235329  | C | GENO_2DF | 1687 | NA     | NA    | NA      | NA    | 1.85  | 3.96E-01 |
|  | <i>TMPRSS6</i> | rs228913   | C | HOM      | 1803 | -1.293 | 1.134 | -3.515  | 0.929 | -1.14 | 2.54E-01 |
|  | <i>TMPRSS6</i> | rs228913   | C | HET      | 1803 | 0.156  | 0.455 | -0.735  | 1.048 | 0.34  | 7.31E-01 |
|  | <i>TMPRSS6</i> | rs228913   | C | GENO_2DF | 1803 | NA     | NA    | NA      | NA    | 1.55  | 4.62E-01 |
|  | <i>TMPRSS6</i> | rs228916   | C | HOM      | 1790 | 1.367  | 1.891 | -2.340  | 5.074 | 0.72  | 4.70E-01 |
|  | <i>TMPRSS6</i> | rs228916   | C | HET      | 1790 | 0.419  | 0.516 | -0.592  | 1.431 | 0.81  | 4.17E-01 |
|  | <i>TMPRSS6</i> | rs228916   | C | GENO_2DF | 1790 | NA     | NA    | NA      | NA    | 1.10  | 5.76E-01 |
|  | <i>TMPRSS6</i> | rs228918   | C | HOM      | 1802 | -0.518 | 0.608 | -1.709  | 0.674 | -0.85 | 3.95E-01 |
|  | <i>TMPRSS6</i> | rs228918   | C | HET      | 1802 | -0.068 | 0.463 | -0.975  | 0.839 | -0.15 | 8.84E-01 |
|  | <i>TMPRSS6</i> | rs228918   | C | GENO_2DF | 1802 | NA     | NA    | NA      | NA    | 0.79  | 6.73E-01 |
|  | <i>TMPRSS6</i> | rs228919   | T | HOM      | 1802 | -0.488 | 0.608 | -1.680  | 0.703 | -0.80 | 4.22E-01 |
|  | <i>TMPRSS6</i> | rs228919   | T | HET      | 1802 | -0.055 | 0.463 | -0.962  | 0.852 | -0.12 | 9.05E-01 |
|  | <i>TMPRSS6</i> | rs228919   | T | GENO_2DF | 1802 | NA     | NA    | NA      | NA    | 0.72  | 6.99E-01 |
|  | <i>TMPRSS6</i> | rs2092169  | T | HOM      | 1127 | -2.907 | 3.667 | -10.090 | 4.280 | -0.79 | 4.28E-01 |
|  | <i>TMPRSS6</i> | rs2092169  | T | HET      | 1127 | 0.291  | 0.748 | -1.175  | 1.757 | 0.39  | 6.97E-01 |

|  |                |            |   |          |      |        |       |        |       |       |          |
|--|----------------|------------|---|----------|------|--------|-------|--------|-------|-------|----------|
|  | <i>TMPRSS6</i> | rs2092169  | T | GENO_2DF | 1127 | NA     | NA    | NA     | NA    | 0.80  | 6.70E-01 |
|  | <i>TMPRSS6</i> | rs228921   | G | HOM      | 1801 | -0.493 | 0.608 | -1.684 | 0.699 | -0.81 | 4.18E-01 |
|  | <i>TMPRSS6</i> | rs228921   | G | HET      | 1801 | -0.045 | 0.463 | -0.952 | 0.862 | -0.10 | 9.23E-01 |
|  | <i>TMPRSS6</i> | rs228921   | G | GENO_2DF | 1801 | NA     | NA    | NA     | NA    | 0.74  | 6.90E-01 |
|  | <i>TMPRSS6</i> | rs3076475  | T | HOM      | 1065 | -1.641 | 1.342 | -4.271 | 0.989 | -1.22 | 2.22E-01 |
|  | <i>TMPRSS6</i> | rs3076475  | T | HET      | 1065 | 0.129  | 0.603 | -1.054 | 1.311 | 0.21  | 8.32E-01 |
|  | <i>TMPRSS6</i> | rs3076475  | T | GENO_2DF | 1065 | NA     | NA    | NA     | NA    | 1.72  | 4.24E-01 |
|  | <i>TMPRSS6</i> | rs228924   | A | HOM      | 1803 | 1.361  | 1.890 | -2.344 | 5.066 | 0.72  | 4.72E-01 |
|  | <i>TMPRSS6</i> | rs228924   | A | HET      | 1803 | 0.443  | 0.511 | -0.557 | 1.444 | 0.87  | 3.85E-01 |
|  | <i>TMPRSS6</i> | rs228924   | A | GENO_2DF | 1803 | NA     | NA    | NA     | NA    | 1.19  | 5.52E-01 |
|  | <i>TMPRSS6</i> | rs228925   | A | HOM      | 1126 | 1.203  | 1.196 | -1.141 | 3.547 | 1.01  | 3.15E-01 |
|  | <i>TMPRSS6</i> | rs228925   | A | HET      | 1126 | 0.308  | 0.572 | -0.813 | 1.429 | 0.54  | 5.91E-01 |
|  | <i>TMPRSS6</i> | rs228925   | A | GENO_2DF | 1126 | NA     | NA    | NA     | NA    | 1.14  | 5.66E-01 |
|  | <i>TMPRSS6</i> | rs5756520  | A | HOM      | 1799 | -0.492 | 0.608 | -1.683 | 0.700 | -0.81 | 4.19E-01 |
|  | <i>TMPRSS6</i> | rs5756520  | A | HET      | 1799 | -0.036 | 0.463 | -0.943 | 0.872 | -0.08 | 9.38E-01 |
|  | <i>TMPRSS6</i> | rs5756520  | A | GENO_2DF | 1799 | NA     | NA    | NA     | NA    | 0.75  | 6.86E-01 |
|  | <i>TMPRSS6</i> | rs11914132 | T | HOM      | 1804 | -0.071 | 0.862 | -1.761 | 1.619 | -0.08 | 9.34E-01 |
|  | <i>TMPRSS6</i> | rs11914132 | T | HET      | 1804 | -0.282 | 0.447 | -1.157 | 0.594 | -0.63 | 5.28E-01 |
|  | <i>TMPRSS6</i> | rs11914132 | T | GENO_2DF | 1804 | NA     | NA    | NA     | NA    | 0.40  | 8.19E-01 |
|  | <i>TMPRSS6</i> | rs738297   | C | HOM      | 1793 | -1.637 | 1.159 | -3.909 | 0.635 | -1.41 | 1.58E-01 |
|  | <i>TMPRSS6</i> | rs738297   | C | HET      | 1793 | 0.264  | 0.463 | -0.644 | 1.171 | 0.57  | 5.69E-01 |
|  | <i>TMPRSS6</i> | rs738297   | C | GENO_2DF | 1793 | NA     | NA    | NA     | NA    | 2.55  | 2.80E-01 |
|  | <i>TMPRSS6</i> | rs11089823 | C | HOM      | 1796 | -0.017 | 0.863 | -1.709 | 1.674 | -0.02 | 9.84E-01 |
|  | <i>TMPRSS6</i> | rs11089823 | C | HET      | 1796 | -0.266 | 0.448 | -1.144 | 0.611 | -0.60 | 5.52E-01 |
|  | <i>TMPRSS6</i> | rs11089823 | C | GENO_2DF | 1796 | NA     | NA    | NA     | NA    | 0.36  | 8.34E-01 |
|  | <i>TMPRSS6</i> | rs11089824 | C | HOM      | 1796 | -0.017 | 0.863 | -1.709 | 1.674 | -0.02 | 9.84E-01 |
|  | <i>TMPRSS6</i> | rs11089824 | C | HET      | 1796 | -0.266 | 0.448 | -1.144 | 0.611 | -0.60 | 5.52E-01 |
|  | <i>TMPRSS6</i> | rs11089824 | C | GENO_2DF | 1796 | NA     | NA    | NA     | NA    | 0.36  | 8.34E-01 |

**Table S5. Haplotype association results for haplotypes in *TMPRSS6* with iron traits compared to the effect of *TMPRSS6* rs855791 alone for the total study population (N=1832). Associations are adjusted for age, gender and time of blood sampling.**

| Cohort | Haplotype    |           |           | Frequency | Beta (95% CI)         |                       |                       |                      |                       |                      |                        |                         |     |
|--------|--------------|-----------|-----------|-----------|-----------------------|-----------------------|-----------------------|----------------------|-----------------------|----------------------|------------------------|-------------------------|-----|
|        | rs855791     | rs2235324 | rs2160906 |           | Log(ferritin), µg/L*  |                       | Iron, µM              |                      | TS, %                 |                      | TIBC, µM               |                         |     |
|        |              |           |           |           | Haplotype model       | Marginal model        | Haplotype model       | Marginal model       | Haplotype model       | Marginal model       | Haplotype model        | Marginal model          |     |
| All    | A            | T         | A         | 0.19      | REF                   | REF                   | REF                   | REF                  | REF                   | REF                  | REF                    | REF                     | REF |
|        | A            | C         | G         | 0.08      | 0.00<br>(-0.06; 0.06) | REF                   | 0.63<br>(-0.19; 1.45) | REF                  | 1.23<br>(-0.27; 2.73) | REF                  | 0.18<br>(-1.18; 1.54)  | REF                     | REF |
|        | A            | T         | G         | 0.18      | 0.02<br>(-0.03; 0.06) | REF                   | 0.34<br>(-0.29; 0.96) | REF                  | 0.72<br>(-0.43; 1.87) | REF                  | 0.01<br>(-1.04; 1.05)  | REF                     | REF |
|        | G            | T         | A         | 0.05      | 0.06<br>(-0.01; 0.13) |                       | 1.25<br>(0.22; 2.28)  |                      | 2.42<br>(0.53; 4.31)  |                      | -0.56<br>(-2.28; 1.16) |                         |     |
|        | G            | C         | G         | 0.29      | 0.03<br>(-0.01; 0.06) | 0.02<br>(-0.00; 0.05) | 1.47<br>(0.94; 2.0)   | 1.29<br>(0.94; 1.64) | 3.06<br>(2.09; 4.03)  | 2.52<br>(1.88; 3.16) | -0.70<br>(-1.58; 0.18) | -0.59<br>(-1.18; -0.01) |     |
|        | G            | T         | G         | 0.20      | 0.02<br>(-0.02; 0.06) |                       | 1.71<br>(1.14; 2.28)  |                      | 3.17<br>(2.12; 4.22)  |                      | -0.34<br>(-1.30; 0.61) |                         |     |
|        | F-statistic† |           |           |           | 0.4                   |                       | 1.1                   |                      | 1.1                   |                      | 0.2                    |                         |     |
|        | P            |           |           |           | 8.2E-01               |                       | 3.7E-01               |                      | 3.4E-01               |                      | 9.6E-01                |                         |     |

All SNPs are genotyped.

CI indicates confidence interval; REF, reference.

\*The dependent variable ferritin was log-transformed. Therefore, the regression coefficients express the changes in log-transformed ferritin (µg/L) for each haplotype relative to the reference haplotype.

†The F-statistic compares the haplotype model to the marginal model of only *TMPRSS6* rs855791 and indicates whether there is an additional effect of the haplotypes on top of the marginal allelic effect of *TMPRSS6* rs855791 alone.

**Table S6. Haplotype association results for haplotypes in *HFE* with iron traits compared to the effect of *HFE* rs1800562 alone for the total study population (N=1832). Associations are adjusted for age, gender and time of blood sampling.**

| Haplotype    |           |           |           | Beta (95% CI)          |                      |                       |                      |                       |                      |                         |                         |
|--------------|-----------|-----------|-----------|------------------------|----------------------|-----------------------|----------------------|-----------------------|----------------------|-------------------------|-------------------------|
| rs1799945*   | rs1800562 | rs198853* | Frequency | Log(ferritin), µg/L†   |                      | Iron, µM              |                      | TS, %                 |                      | TIBC, µM                |                         |
|              |           |           |           | Haplotype model        | Marginal model       | Haplotype model       | Marginal model       | Haplotype model       | Marginal model       | Haplotype model         | Marginal model          |
| C            | G         | C         | 0.34      | REF                    | REF                  | REF                   | REF                  | REF                   | REF                  | REF                     | REF                     |
| G            | G         | T         | 0.15      | 0.02<br>(-0.02; 0.06)  | REF                  | 1.19<br>(0.67; 1.71)  | REF                  | 2.51<br>(1.56; 3.46)  | REF                  | -0.71<br>(-1.57; 0.16)  | REF                     |
| C            | G         | T         | 0.45      | -0.02<br>(-0.05; 0.01) | REF                  | 0.15<br>(-0.24; 0.55) | REF                  | 0.11<br>(-0.61; 0.83) | REF                  | 0.32<br>(-0.34; 0.98)   | REF                     |
| C            | A         | T         | 0.06      | 0.06<br>(0.01; 0.11)   | 0.07<br>(0.02; 0.12) | 2.78<br>(2.01; 3.55)  | 2.49<br>(1.76; 3.22) | 6.30<br>(4.89; 7.7)   | 5.81<br>(4.48; 7.14) | -3.13<br>(-4.41; -1.85) | -3.18<br>(-4.39; -1.98) |
| F-statistic‡ |           |           |           | 2.6                    |                      | 10.7                  |                      | 15.5                  |                      | 2.9                     |                         |
| P            |           |           |           | 7.1E-02                |                      | 2.4E-05               |                      | 2.2E-07               |                      | 5.8E-02                 |                         |

CI indicates confidence interval; REF, reference.

\*SNPs indicated with an asterisk (\*) are imputed.

†The dependent variable ferritin was log-transformed. Therefore, the regression coefficients express the changes in log-transformed ferritin (µg/L) for each haplotype relative to the reference haplotype.

‡The F-statistic compares the haplotype model to the marginal model of only *HFE* rs1800562 and indicates whether there is an additional effect of the haplotypes on top of the marginal allelic effect of *HFE* rs1800562 alone.

**Table S7. Associations between *TMPRSS6* rs855791 and *HFE* rs1800562 with iron parameters for subset 1 (N=1505). Associations are adjusted for age, gender, time of blood sampling and additionally for serum hepcidin or the ratio hepcidin/ferritin.**

|                          |                                    | Additionally adjusted for: | Total N* | P        | AG  |                        | AA  |                        |
|--------------------------|------------------------------------|----------------------------|----------|----------|-----|------------------------|-----|------------------------|
|                          |                                    |                            |          |          | N   | Beta AG vs GG (95% CI) | N   | Beta AA vs GG (95% CI) |
| <i>TMPRSS6</i> rs855791+ | Log(hepcidin)‡, nM                 | NA                         | 1500     | 4.12E-02 | 752 | 0.00 (-0.04; 0.03)     | 309 | 0.05 (0.00; 0.09)      |
|                          | Log(ferritin), µg/L‡               | NA                         | 1498     | 1.38E-01 | 750 | -0.03 (-0.06; 0.01)    | 309 | -0.04 (-0.08; 0.00)    |
|                          |                                    | Log(hepcidin)              | 1498     | 1.82E-04 | 750 | -0.02 (-0.05; 0.00)    | 309 | -0.07 (-0.10; -0.04)   |
|                          | Log(hepcidin/ferritin)‡, nmoles/µg | NA                         | 1498     | 1.43E-05 | 750 | 0.02 (-0.00; 0.05)     | 309 | 0.08 (0.05; 0.12)      |
|                          | Log(hepcidin/TS)‡, nM/%            | NA                         | 1481     | 1.79E-07 | 743 | 0.05 (0.01; 0.08)      | 303 | 0.13 (0.08; 0.17)      |
|                          | Iron, µM                           | NA                         | 1481     | 2.35E-14 | 743 | -1.71 (-2.30; -1.12)   | 303 | -2.83 (-3.55; -2.10)   |
|                          |                                    | Log(hepcidin)              | 1481     | 2.94E-14 | 743 | -1.71 (-2.30; -1.12)   | 303 | -2.82 (-3.54; -2.09)   |
|                          |                                    | Log(hepcidin/ferritin)     | 1481     | 7.42E-13 | 743 | -1.66 (-2.24; -1.08)   | 303 | -2.63 (-3.36; -1.91)   |
|                          | TS, %                              | NA                         | 1481     | 1.01E-16 | 743 | -3.29 (-4.35; -2.22)   | 303 | -5.60 (-6.92; -4.28)   |
|                          |                                    | Log(hepcidin)              | 1481     | 4.37E-17 | 743 | -3.29 (-4.35; -2.22)   | 303 | -5.68 (-7.00; -4.36)   |
|                          |                                    | Log(hepcidin/ferritin)     | 1481     | 4.31E-15 | 743 | -3.19 (-4.25; -2.14)   | 303 | -5.26 (-6.57; -3.94)   |
|                          | TIBC, µM                           | NA                         | 1481     | 1.01E-01 | 743 | 0.62 (-0.33; 1.57)     | 303 | 1.28 (0.10; 2.46)      |
|                          |                                    | Log(hepcidin)              | 1481     | 4.93E-02 | 743 | 0.62 (-0.32; 1.57)     | 303 | 1.46 (0.29; 2.63)      |
|                          |                                    | Log(hepcidin/ferritin)     | 1481     | 1.08E-01 | 743 | 0.61 (-0.34; 1.57)     | 303 | 1.27 (0.08; 2.45)      |
| <hr/>                    |                                    |                            |          |          |     |                        |     |                        |
|                          |                                    | Additionally adjusted for: | Total N* | P        | AG  |                        | AA  |                        |
|                          |                                    |                            |          |          | N   | Beta AG vs GG (95% CI) | N   | Beta AA vs GG (95% CI) |
| <i>HFE</i> rs1800562+    | Log(hepcidin)‡, nM                 | NA                         | 1500     | 5.80E-02 | 182 | -0.03 (-0.07; 0.02)    | 4   | -0.31 (-0.59; -0.02)   |
|                          | Log(ferritin), µg/L‡               | NA                         | 1498     | 2.37E-06 | 181 | 0.05 (0.00; 0.09)      | 4   | 0.65 (0.37; 0.92)      |
|                          |                                    | Log(hepcidin)              | 1498     | 1.01E-16 | 181 | 0.06 (0.03; 0.09)      | 4   | 0.84 (0.63; 1.05)      |
|                          | Log(hepcidin/ferritin)‡, nmoles/µg | NA                         | 1498     | 4.68E-10 | 181 | -0.07 (-0.11; -0.03)   | 4   | -0.65 (-0.88; -0.42)   |
|                          | Log(hepcidin/TS)‡, nM/%            | NA                         | 1481     | 1.84E-07 | 177 | -0.10 (-0.15; -0.05)   | 4   | -0.60 (-0.90; -0.29)   |
|                          | Iron, µM                           | NA                         | 1481     | 9.11E-15 | 177 | 2.78 (2.00; 3.55)      | 4   | 10.15 (5.29; 15.00)    |
|                          |                                    | Log(hepcidin)              | 1481     | 1.15E-14 | 177 | 2.77 (1.99; 3.55)      | 4   | 10.10 (5.23; 14.96)    |
|                          |                                    | Log(hepcidin/ferritin)     | 1481     | 1.53E-12 | 177 | 2.62 (1.84; 3.40)      | 4   | 8.61 (3.74; 13.49)     |
|                          | TS, %                              | NA                         | 1481     | 2.08E-20 | 177 | 5.97 (4.56; 7.37)      | 4   | 21.45 (12.67; 30.23)   |
|                          |                                    | Log(hepcidin)              | 1481     | 7.88E-21 | 177 | 6.00 (4.60; 7.41)      | 4   | 21.97 (13.18; 30.75)   |
|                          |                                    | Log(hepcidin/ferritin)     | 1481     | 8.10E-18 | 177 | 5.70 (4.29; 7.10)      | 4   | 18.79 (9.97; 27.61)    |
|                          | TIBC, µM                           | NA                         | 1481     | 2.10E-04 | 177 | -2.23 (-3.49; -0.97)   | 4   | -9.05 (-16.90; -1.20)  |
|                          |                                    | Log(hepcidin)              | 1481     | 5.44E-05 | 177 | -2.32 (-3.57; -1.07)   | 4   | -10.27 (-18.05; -2.48) |
|                          |                                    | Log(hepcidin/ferritin)     | 1481     | 2.21E-04 | 177 | -2.25 (-3.51; -0.98)   | 4   | -9.19 (-17.12; -1.25)  |

N indicates number; Beta AG vs GG, regression coefficient for AG genotype versus GG genotype; Beta AA vs GG, regression coefficient for AA genotype versus GG genotype; CI, confidence interval.

For *TMPRSS6* rs855791 (p.Ala736Val), minor allele is A with frequency 0.455 in the whole cohort. Therefore, genotype GG is used as the reference genotype.

For *HFE* rs1800562 (p.Cys282Tyr), minor allele is A with frequency 0.063 in the whole cohort. Therefore, genotype GG is used as the reference genotype.

\*Numbers are different from the total number of included persons because of missing values.

†Both SNPs are genotyped.

‡The dependent variables hepcidin, ferritin, hepcidin/ferritin and hepcidin/TS were log-transformed. Therefore, the regression coefficients express the changes in each log-transformed variable that are associated with each genotype relative to the reference genotype.

**Table S8. Associations between *TMPRSS6* rs855791 and *HFE* rs1800562 with iron parameters for subset 2 (N=1177). Associations are adjusted for age, gender, time of blood sampling and additionally for serum hepcidin or the ratio hepcidin/ferritin.**

|                          |                                    | Additionally adjusted for: | Total N* | P        | AG  |                        | AA  |                        |
|--------------------------|------------------------------------|----------------------------|----------|----------|-----|------------------------|-----|------------------------|
|                          |                                    |                            |          |          | N   | Beta AG vs GG (95% CI) | N   | Beta AA vs GG (95% CI) |
| <i>TMPRSS6</i> rs855791+ | Log(hepcidin)‡, nM                 | NA                         | 1174     | 3.55E-01 | 583 | -0.01 (-0.06; 0.05)    | 234 | 0.04 (-0.03; 0.10)     |
|                          | Log(ferritin), µg/L‡               | NA                         | 1172     | 1.42E-01 | 581 | -0.04 (-0.09; 0.01)    | 234 | -0.05 (-0.11; 0.01)    |
|                          |                                    | Log(hepcidin)              | 1172     | 1.89E-04 | 581 | -0.04 (-0.07; 0.01)    | 234 | -0.08 (-0.12; -0.04)   |
|                          | Log(hepcidin/ferritin)‡, nmoles/µg | NA                         | 1172     | 1.59E-04 | 580 | 0.04 (0.01; 0.07)      | 232 | 0.09 (0.05; 0.13)      |
|                          | Log(hepcidin/TS)‡, nM/%            | NA                         | 1164     | 3.38E-04 | 575 | 0.05 (0.00; 0.10)      | 229 | 0.13 (0.06; 0.189)     |
|                          | Iron, µM                           | NA                         | 1164     | 5.49E-11 | 576 | -1.71 (-2.39; -1.02)   | 231 | -2.89 (-3.75; -2.04)   |
|                          |                                    | Log(hepcidin)              | 1164     | 1.27E-11 | 576 | -1.70 (-2.37; -1.02)   | 231 | -2.97 (-3.82; -2.12)   |
|                          |                                    | Log(hepcidin/ferritin)     | 1164     | 3.87E-10 | 576 | -1.66 (-2.34; -0.97)   | 231 | -2.78 (-3.64; -1.92)   |
|                          | TS, %                              | NA                         | 1164     | 1.05E-12 | 576 | -3.48 (-4.75; -2.20)   | 231 | -5.80 (-7.39; -4.20)   |
|                          |                                    | Log(hepcidin)              | 1164     | 3.37E-14 | 576 | -3.45 (-4.68; -2.21)   | 231 | -6.03 (-7.59; -4.48)   |
|                          |                                    | Log(hepcidin/ferritin)     | 1164     | 8.41E-12 | 576 | -3.39 (-4.66; -2.11)   | 231 | -5.59 (-7.20; -3.99)   |
|                          | TIBC, µM                           | NA                         | 1164     | 5.30E-02 | 576 | 1.12 (-0.03; 2.26)     | 231 | 1.63 (0.21; 3.06)      |
|                          |                                    | Log(hepcidin)              | 1164     | 1.61E-02 | 576 | 1.08 (0.00; 2.16)      | 231 | 1.93 (0.57; 3.28)      |
|                          |                                    | Log(hepcidin/ferritin)     | 1164     | 4.11E-02 | 576 | 1.15 (0.01; 2.30)      | 231 | 1.72 (0.28; 3.16)      |
| <hr/>                    |                                    |                            |          |          |     |                        |     |                        |
|                          |                                    | Additionally adjusted for: | Total N* | P        | AG  |                        | AA  |                        |
|                          |                                    |                            |          |          | N   | Beta AG vs GG (95% CI) | N   | Beta AA vs GG (95% CI) |
| <i>HFE</i> rs1800562+    | Log(hepcidin)‡, nM                 | NA                         | 1174     | 4.46E-01 | 129 | -0.01 (-0.08; 0.06)    | 4   | -0.24 (-0.62; 0.14)    |
|                          | Log(ferritin), µg/L‡               | NA                         | 1172     | 2.99E-04 | 128 | 0.03 (-0.04; 0.09)     | 4   | 0.71 (0.36; 1.06)      |
|                          |                                    | Log(hepcidin)              | 1172     | 1.48E-14 | 128 | 0.03 (-0.01; 0.07)     | 4   | 0.89 (0.67; 1.11)      |
|                          | Log(hepcidin/ferritin)‡, nmoles/µg | NA                         | 1172     | 7.82E-07 | 128 | -0.03 (-0.08; 0.02)    | 4   | -0.65 (-0.89; -0.40)   |
|                          | Log(hepcidin/TS)‡, nM/%            | NA                         | 1164     | 1.04E-03 | 127 | -0.09 (-0.16; -0.02)   | 4   | -0.54 (-0.91; -0.17)   |
|                          | Iron, µM                           | NA                         | 1164     | 6.84E-11 | 127 | 2.79 (1.83; 3.75)      | 4   | 10.09 (5.00; 15.18)    |
|                          |                                    | Log(hepcidin)              | 1164     | 1.97E-11 | 127 | 2.79 (1.84; 3.74)      | 4   | 10.57 (5.53; 15.61)    |
|                          |                                    | Log(hepcidin/ferritin)     | 1164     | 4.40E-10 | 127 | 2.75 (1.79; 3.70)      | 4   | 9.22 (4.08; 14.36)     |
|                          | TS, %                              | NA                         | 1164     | 4.25E-14 | 127 | 5.93 (4.15; 7.71)      | 4   | 21.51 (12.06; 30.96)   |
|                          |                                    | Log(hepcidin)              | 1164     | 1.47E-15 | 127 | 5.94 (4.21; 7.66)      | 4   | 22.98 (13.79; 32.16)   |
|                          |                                    | Log(hepcidin/ferritin)     | 1164     | 3.49E-13 | 127 | 5.86 (4.08; 7.63)      | 4   | 19.98 (10.44; 29.53)   |
|                          | TIBC, µM                           | NA                         | 1164     | 2.06E-03 | 127 | -2.23 (-3.82; -0.64)   | 4   | -9.70 (-18.16; -1.24)  |
|                          |                                    | Log(hepcidin)              | 1164     | 3.02E-04 | 127 | -2.24 (-3.75; -0.74)   | 4   | -11.51 (-19.50; -3.51) |
|                          |                                    | Log(hepcidin/ferritin)     | 1164     | 1.35E-03 | 127 | -2.27 (-3.86; -0.68)   | 4   | -10.47 (-19.03; -1.91) |



N indicates number; Beta AG vs GG, regression coefficient for AG genotype versus GG genotype; Beta AA vs GG, regression coefficient for AA genotype versus GG genotype; CI, confidence interval.

For *TM6RS6* rs855791 (p.Ala736Val), minor allele is A with frequency 0.455 in the whole cohort. Therefore, genotype GG is used as the reference genotype.

For *HFE* rs1800562 (p.Cys282Tyr), minor allele is A with frequency 0.063 in the whole cohort. Therefore, genotype GG is used as the reference genotype.

\*Numbers are different from the total number of included persons because of missing values.

†Both SNPs are genotyped.

‡The dependent variables hepcidin, ferritin, hepcidin/ferritin and hepcidin/TS were log-transformed. Therefore, the regression coefficients express the changes in each log-transformed variable that are associated with each genotype relative to the reference genotype.

Table S9. *HFE* and *TMPRSS6* single SNP association results for hepcidin, hepcidin/ferritin and hepcidin/TS in the total study population.

| Trait        | Gene       | SNP       | A1 | TEST     | NMISS | BETA   | SE    | L95    | U95    | STAT  | P        |
|--------------|------------|-----------|----|----------|-------|--------|-------|--------|--------|-------|----------|
| log(hpcidin) | <i>HFE</i> | rs9295687 | C  | HOM      | 1765  | -0.042 | 0.028 | -0.096 | 0.012  | -1.53 | 1.26E-01 |
|              | <i>HFE</i> | rs9295687 | C  | HET      | 1765  | -0.031 | 0.021 | -0.071 | 0.010  | -1.49 | 1.38E-01 |
|              | <i>HFE</i> | rs9295687 | C  | GENO_2DF | 1765  | NA     | NA    | NA     | NA     | 3.20  | 2.02E-01 |
|              | <i>HFE</i> | rs4529296 | G  | HOM      | 1765  | -0.042 | 0.028 | -0.096 | 0.012  | -1.53 | 1.26E-01 |
|              | <i>HFE</i> | rs4529296 | G  | HET      | 1765  | -0.031 | 0.021 | -0.071 | 0.010  | -1.49 | 1.38E-01 |
|              | <i>HFE</i> | rs4529296 | G  | GENO_2DF | 1765  | NA     | NA    | NA     | NA     | 3.20  | 2.02E-01 |
|              | <i>HFE</i> | rs9379825 | A  | HOM      | 1765  | -0.042 | 0.028 | -0.096 | 0.012  | -1.53 | 1.26E-01 |
|              | <i>HFE</i> | rs9379825 | A  | HET      | 1765  | -0.031 | 0.021 | -0.071 | 0.010  | -1.49 | 1.38E-01 |
|              | <i>HFE</i> | rs9379825 | A  | GENO_2DF | 1765  | NA     | NA    | NA     | NA     | 3.20  | 2.02E-01 |
|              | <i>HFE</i> | rs9467672 | T  | HOM      | 1765  | -0.042 | 0.028 | -0.096 | 0.012  | -1.53 | 1.26E-01 |
|              | <i>HFE</i> | rs9467672 | T  | HET      | 1765  | -0.031 | 0.021 | -0.071 | 0.010  | -1.49 | 1.38E-01 |
|              | <i>HFE</i> | rs9467672 | T  | GENO_2DF | 1765  | NA     | NA    | NA     | NA     | 3.20  | 2.02E-01 |
|              | <i>HFE</i> | rs9295688 | A  | HOM      | 1764  | -0.043 | 0.028 | -0.097 | 0.011  | -1.56 | 1.20E-01 |
|              | <i>HFE</i> | rs9295688 | A  | HET      | 1764  | -0.031 | 0.021 | -0.071 | 0.010  | -1.48 | 1.38E-01 |
|              | <i>HFE</i> | rs9295688 | A  | GENO_2DF | 1764  | NA     | NA    | NA     | NA     | 3.25  | 1.97E-01 |
|              | <i>HFE</i> | rs2006736 | T  | HOM      | 1764  | -0.043 | 0.028 | -0.097 | 0.011  | -1.56 | 1.20E-01 |
|              | <i>HFE</i> | rs2006736 | T  | HET      | 1764  | -0.031 | 0.021 | -0.071 | 0.010  | -1.48 | 1.38E-01 |
|              | <i>HFE</i> | rs2006736 | T  | GENO_2DF | 1764  | NA     | NA    | NA     | NA     | 3.25  | 1.97E-01 |
|              | <i>HFE</i> | rs1800702 | G  | HOM      | 1764  | -0.043 | 0.028 | -0.097 | 0.011  | -1.56 | 1.20E-01 |
|              | <i>HFE</i> | rs1800702 | G  | HET      | 1764  | -0.031 | 0.021 | -0.071 | 0.010  | -1.48 | 1.38E-01 |
|              | <i>HFE</i> | rs1800702 | G  | GENO_2DF | 1764  | NA     | NA    | NA     | NA     | 3.25  | 1.97E-01 |
|              | <i>HFE</i> | rs2794720 | C  | HOM      | 1764  | -0.043 | 0.028 | -0.097 | 0.011  | -1.56 | 1.20E-01 |
|              | <i>HFE</i> | rs2794720 | C  | HET      | 1764  | -0.031 | 0.021 | -0.071 | 0.010  | -1.48 | 1.38E-01 |
|              | <i>HFE</i> | rs2794720 | C  | GENO_2DF | 1764  | NA     | NA    | NA     | NA     | 3.25  | 1.97E-01 |
|              | <i>HFE</i> | rs2794719 | G  | HOM      | 1764  | -0.043 | 0.028 | -0.097 | 0.011  | -1.56 | 1.20E-01 |
|              | <i>HFE</i> | rs2794719 | G  | HET      | 1764  | -0.031 | 0.021 | -0.071 | 0.010  | -1.48 | 1.38E-01 |
|              | <i>HFE</i> | rs2794719 | G  | GENO_2DF | 1764  | NA     | NA    | NA     | NA     | 3.25  | 1.97E-01 |
|              | <i>HFE</i> | rs9366637 | T  | HOM      | 1824  | -0.031 | 0.149 | -0.323 | 0.261  | -0.21 | 8.35E-01 |
|              | <i>HFE</i> | rs9366637 | T  | HET      | 1824  | -0.065 | 0.030 | -0.124 | -0.006 | -2.16 | 3.09E-02 |
|              | <i>HFE</i> | rs9366637 | T  | GENO_2DF | 1824  | NA     | NA    | NA     | NA     | 4.69  | 9.58E-02 |

|  |     |            |   |          |      |        |       |        |       |       |          |
|--|-----|------------|---|----------|------|--------|-------|--------|-------|-------|----------|
|  | HFE | rs1799945  | G | HOM      | 1775 | -0.021 | 0.055 | -0.128 | 0.086 | -0.39 | 6.96E-01 |
|  | HFE | rs1799945  | G | HET      | 1775 | -0.015 | 0.022 | -0.059 | 0.028 | -0.68 | 4.95E-01 |
|  | HFE | rs1799945  | G | GENO_2DF | 1775 | NA     | NA    | NA     | NA    | 0.57  | 7.51E-01 |
|  | HFE | rs2071303  | C | HOM      | 1824 | 0.003  | 0.030 | -0.056 | 0.061 | 0.09  | 9.28E-01 |
|  | HFE | rs2071303  | C | HET      | 1824 | 0.000  | 0.020 | -0.039 | 0.039 | -0.01 | 9.93E-01 |
|  | HFE | rs2071303  | C | GENO_2DF | 1824 | NA     | NA    | NA     | NA    | 0.01  | 9.95E-01 |
|  | HFE | rs1800562  | A | HOM      | 1824 | -0.270 | 0.197 | -0.656 | 0.117 | -1.37 | 1.72E-01 |
|  | HFE | rs1800562  | A | HET      | 1824 | -0.004 | 0.029 | -0.060 | 0.052 | -0.15 | 8.78E-01 |
|  | HFE | rs1800562  | A | GENO_2DF | 1824 | NA     | NA    | NA     | NA    | 1.89  | 3.89E-01 |
|  | HFE | rs1800708  | C | HOM      | 1823 | -0.073 | 0.161 | -0.389 | 0.243 | -0.45 | 6.49E-01 |
|  | HFE | rs1800708  | C | HET      | 1823 | -0.055 | 0.030 | -0.113 | 0.003 | -1.85 | 6.48E-02 |
|  | HFE | rs1800708  | C | GENO_2DF | 1823 | NA     | NA    | NA     | NA    | 3.59  | 1.66E-01 |
|  | HFE | rs2858996  | T | HOM      | 1823 | -0.006 | 0.050 | -0.104 | 0.092 | -0.12 | 9.05E-01 |
|  | HFE | rs2858996  | T | HET      | 1823 | -0.008 | 0.020 | -0.046 | 0.031 | -0.39 | 6.98E-01 |
|  | HFE | rs2858996  | T | GENO_2DF | 1823 | NA     | NA    | NA     | NA    | 0.16  | 9.25E-01 |
|  | HFE | rs1572982  | A | HOM      | 1824 | -0.019 | 0.027 | -0.071 | 0.033 | -0.73 | 4.68E-01 |
|  | HFE | rs1572982  | A | HET      | 1824 | -0.017 | 0.022 | -0.060 | 0.025 | -0.81 | 4.18E-01 |
|  | HFE | rs1572982  | A | GENO_2DF | 1824 | NA     | NA    | NA     | NA    | 0.79  | 6.74E-01 |
|  | HFE | rs707889   | A | HOM      | 1824 | -0.006 | 0.050 | -0.104 | 0.092 | -0.12 | 9.05E-01 |
|  | HFE | rs707889   | A | HET      | 1824 | -0.007 | 0.020 | -0.046 | 0.031 | -0.38 | 7.06E-01 |
|  | HFE | rs707889   | A | GENO_2DF | 1824 | NA     | NA    | NA     | NA    | 0.15  | 9.29E-01 |
|  | HFE | rs1045537  | C | HOM      | 1773 | -0.082 | 0.070 | -0.218 | 0.054 | -1.18 | 2.37E-01 |
|  | HFE | rs1045537  | C | HET      | 1773 | 0.070  | 0.023 | 0.026  | 0.115 | 3.09  | 2.05E-03 |
|  | HFE | rs1045537  | C | GENO_2DF | 1773 | NA     | NA    | NA     | NA    | 11.53 | 3.13E-03 |
|  | HFE | rs12346    | T | HOM      | 1824 | 0.032  | 0.031 | -0.030 | 0.093 | 1.00  | 3.16E-01 |
|  | HFE | rs12346    | T | HET      | 1824 | 0.016  | 0.020 | -0.022 | 0.054 | 0.81  | 4.16E-01 |
|  | HFE | rs12346    | T | GENO_2DF | 1824 | NA     | NA    | NA     | NA    | 1.28  | 5.28E-01 |
|  | HFE | rs17596719 | A | HOM      | 1822 | -0.022 | 0.089 | -0.195 | 0.152 | -0.24 | 8.08E-01 |
|  | HFE | rs17596719 | A | HET      | 1822 | -0.033 | 0.023 | -0.079 | 0.012 | -1.44 | 1.49E-01 |
|  | HFE | rs17596719 | A | GENO_2DF | 1822 | NA     | NA    | NA     | NA    | 2.11  | 3.48E-01 |
|  | HFE | rs6918586  | C | HOM      | 1821 | 0.002  | 0.028 | -0.053 | 0.056 | 0.06  | 9.54E-01 |
|  | HFE | rs6918586  | C | HET      | 1821 | -0.001 | 0.020 | -0.041 | 0.039 | -0.03 | 9.77E-01 |
|  | HFE | rs6918586  | C | GENO_2DF | 1821 | NA     | NA    | NA     | NA    | 0.01  | 9.97E-01 |

|  |     |           |   |          |      |        |       |        |       |       |          |
|--|-----|-----------|---|----------|------|--------|-------|--------|-------|-------|----------|
|  | HFE | rs9393685 | C | HOM      | 1817 | -0.072 | 0.161 | -0.388 | 0.244 | -0.45 | 6.55E-01 |
|  | HFE | rs9393685 | C | HET      | 1817 | -0.048 | 0.029 | -0.104 | 0.009 | -1.64 | 1.01E-01 |
|  | HFE | rs9393685 | C | GENO_2DF | 1817 | NA     | NA    | NA     | NA    | 2.87  | 2.39E-01 |
|  | HFE | rs1150659 | A | HOM      | 1822 | -0.004 | 0.050 | -0.102 | 0.093 | -0.09 | 9.28E-01 |
|  | HFE | rs1150659 | A | HET      | 1822 | -0.008 | 0.020 | -0.047 | 0.031 | -0.40 | 6.86E-01 |
|  | HFE | rs1150659 | A | GENO_2DF | 1822 | NA     | NA    | NA     | NA    | 0.16  | 9.21E-01 |
|  | HFE | rs1150660 | A | HOM      | 1824 | 0.032  | 0.031 | -0.030 | 0.093 | 1.00  | 3.16E-01 |
|  | HFE | rs1150660 | A | HET      | 1824 | 0.016  | 0.020 | -0.022 | 0.054 | 0.81  | 4.16E-01 |
|  | HFE | rs1150660 | A | GENO_2DF | 1824 | NA     | NA    | NA     | NA    | 1.28  | 5.28E-01 |
|  | HFE | rs198857  | G | HOM      | 1822 | -0.019 | 0.027 | -0.071 | 0.033 | -0.71 | 4.79E-01 |
|  | HFE | rs198857  | G | HET      | 1822 | -0.017 | 0.022 | -0.059 | 0.025 | -0.79 | 4.31E-01 |
|  | HFE | rs198857  | G | GENO_2DF | 1822 | NA     | NA    | NA     | NA    | 0.75  | 6.89E-01 |
|  | HFE | rs198856  | G | HOM      | 1822 | -0.019 | 0.027 | -0.071 | 0.033 | -0.71 | 4.79E-01 |
|  | HFE | rs198856  | G | HET      | 1822 | -0.017 | 0.022 | -0.059 | 0.025 | -0.79 | 4.31E-01 |
|  | HFE | rs198856  | G | GENO_2DF | 1822 | NA     | NA    | NA     | NA    | 0.75  | 6.89E-01 |
|  | HFE | rs1543680 | A | HOM      | 1818 | -0.011 | 0.050 | -0.109 | 0.087 | -0.22 | 8.26E-01 |
|  | HFE | rs1543680 | A | HET      | 1818 | -0.008 | 0.020 | -0.047 | 0.031 | -0.41 | 6.82E-01 |
|  | HFE | rs1543680 | A | GENO_2DF | 1818 | NA     | NA    | NA     | NA    | 0.20  | 9.07E-01 |
|  | HFE | rs198855  | A | HOM      | 1775 | -0.043 | 0.037 | -0.115 | 0.029 | -1.18 | 2.37E-01 |
|  | HFE | rs198855  | A | HET      | 1775 | -0.022 | 0.020 | -0.061 | 0.017 | -1.09 | 2.77E-01 |
|  | HFE | rs198855  | A | GENO_2DF | 1775 | NA     | NA    | NA     | NA    | 2.12  | 3.46E-01 |
|  | HFE | rs7743957 | C | HOM      | 1817 | -0.072 | 0.161 | -0.388 | 0.244 | -0.45 | 6.55E-01 |
|  | HFE | rs7743957 | C | HET      | 1817 | -0.048 | 0.029 | -0.104 | 0.009 | -1.64 | 1.01E-01 |
|  | HFE | rs7743957 | C | GENO_2DF | 1817 | NA     | NA    | NA     | NA    | 2.87  | 2.39E-01 |
|  | HFE | rs198854  | T | HOM      | 1823 | -0.019 | 0.027 | -0.071 | 0.033 | -0.72 | 4.71E-01 |
|  | HFE | rs198854  | T | HET      | 1823 | -0.017 | 0.022 | -0.059 | 0.025 | -0.79 | 4.31E-01 |
|  | HFE | rs198854  | T | GENO_2DF | 1823 | NA     | NA    | NA     | NA    | 0.76  | 6.85E-01 |
|  | HFE | rs198853  | C | HOM      | 1824 | 0.032  | 0.031 | -0.030 | 0.093 | 1.00  | 3.16E-01 |
|  | HFE | rs198853  | C | HET      | 1824 | 0.016  | 0.020 | -0.022 | 0.054 | 0.81  | 4.16E-01 |
|  | HFE | rs198853  | C | GENO_2DF | 1824 | NA     | NA    | NA     | NA    | 1.28  | 5.28E-01 |
|  | HFE | rs2229768 | C | HOM      | 1823 | -0.004 | 0.050 | -0.102 | 0.093 | -0.09 | 9.30E-01 |
|  | HFE | rs2229768 | C | HET      | 1823 | -0.008 | 0.020 | -0.047 | 0.031 | -0.40 | 6.90E-01 |
|  | HFE | rs2229768 | C | GENO_2DF | 1823 | NA     | NA    | NA     | NA    | 0.16  | 9.23E-01 |

|  |         |            |   |          |      |        |       |        |       |       |          |
|--|---------|------------|---|----------|------|--------|-------|--------|-------|-------|----------|
|  | HFE     | rs198852   | G | HOM      | 1824 | 0.026  | 0.028 | -0.028 | 0.081 | 0.94  | 3.47E-01 |
|  | HFE     | rs198852   | G | HET      | 1824 | 0.004  | 0.020 | -0.036 | 0.044 | 0.20  | 8.38E-01 |
|  | HFE     | rs198852   | G | GENO_2DF | 1824 | NA     | NA    | NA     | NA    | 0.92  | 6.30E-01 |
|  | HFE     | rs198851   | T | HOM      | 1664 | 0.002  | 0.063 | -0.121 | 0.124 | 0.03  | 9.80E-01 |
|  | HFE     | rs198851   | T | HET      | 1664 | -0.004 | 0.024 | -0.050 | 0.043 | -0.16 | 8.71E-01 |
|  | HFE     | rs198851   | T | GENO_2DF | 1664 | NA     | NA    | NA     | NA    | 0.03  | 9.86E-01 |
|  | HFE     | rs198848   | T | HOM      | 1824 | 0.026  | 0.028 | -0.028 | 0.081 | 0.94  | 3.47E-01 |
|  | HFE     | rs198848   | T | HET      | 1824 | 0.004  | 0.020 | -0.036 | 0.044 | 0.20  | 8.38E-01 |
|  | HFE     | rs198848   | T | GENO_2DF | 1824 | NA     | NA    | NA     | NA    | 0.92  | 6.30E-01 |
|  | TMPRSS6 | rs2235320  | T | HOM      | 1823 | 0.044  | 0.076 | -0.106 | 0.194 | 0.57  | 5.69E-01 |
|  | TMPRSS6 | rs2235320  | T | HET      | 1823 | 0.051  | 0.022 | 0.007  | 0.094 | 2.29  | 2.24E-02 |
|  | TMPRSS6 | rs2235320  | T | GENO_2DF | 1823 | NA     | NA    | NA     | NA    | 5.40  | 6.73E-02 |
|  | TMPRSS6 | rs2235321  | A | HOM      | 1578 | -0.019 | 0.033 | -0.083 | 0.046 | -0.56 | 5.75E-01 |
|  | TMPRSS6 | rs2235321  | A | HET      | 1578 | -0.001 | 0.021 | -0.043 | 0.040 | -0.07 | 9.44E-01 |
|  | TMPRSS6 | rs2235321  | A | GENO_2DF | 1578 | NA     | NA    | NA     | NA    | 0.33  | 8.47E-01 |
|  | TMPRSS6 | rs855791   | A | HOM      | 1824 | 0.046  | 0.027 | -0.007 | 0.098 | 1.71  | 8.78E-02 |
|  | TMPRSS6 | rs855791   | A | HET      | 1824 | 0.009  | 0.021 | -0.033 | 0.051 | 0.41  | 6.82E-01 |
|  | TMPRSS6 | rs855791   | A | GENO_2DF | 1824 | NA     | NA    | NA     | NA    | 3.20  | 2.02E-01 |
|  | TMPRSS6 | rs5756504  | T | HOM      | 1622 | -0.032 | 0.034 | -0.098 | 0.034 | -0.94 | 3.46E-01 |
|  | TMPRSS6 | rs5756504  | T | HET      | 1622 | -0.009 | 0.021 | -0.050 | 0.032 | -0.42 | 6.72E-01 |
|  | TMPRSS6 | rs5756504  | T | GENO_2DF | 1622 | NA     | NA    | NA     | NA    | 0.90  | 6.37E-01 |
|  | TMPRSS6 | rs5756505  | C | HOM      | 1666 | -0.029 | 0.031 | -0.091 | 0.032 | -0.93 | 3.52E-01 |
|  | TMPRSS6 | rs5756505  | C | HET      | 1666 | -0.007 | 0.021 | -0.048 | 0.034 | -0.32 | 7.50E-01 |
|  | TMPRSS6 | rs5756505  | C | GENO_2DF | 1666 | NA     | NA    | NA     | NA    | 0.87  | 6.48E-01 |
|  | TMPRSS6 | rs5756506  | C | HOM      | 1654 | -0.029 | 0.033 | -0.094 | 0.036 | -0.88 | 3.78E-01 |
|  | TMPRSS6 | rs5756506  | C | HET      | 1654 | -0.011 | 0.021 | -0.051 | 0.030 | -0.52 | 6.05E-01 |
|  | TMPRSS6 | rs5756506  | C | GENO_2DF | 1654 | NA     | NA    | NA     | NA    | 0.83  | 6.60E-01 |
|  | TMPRSS6 | rs4820268  | G | HOM      | 1819 | 0.043  | 0.027 | -0.009 | 0.096 | 1.61  | 1.08E-01 |
|  | TMPRSS6 | rs4820268  | G | HET      | 1819 | 0.020  | 0.022 | -0.023 | 0.063 | 0.93  | 3.53E-01 |
|  | TMPRSS6 | rs4820268  | G | GENO_2DF | 1819 | NA     | NA    | NA     | NA    | 2.60  | 2.73E-01 |
|  | TMPRSS6 | rs13055107 | A | HOM      | 1622 | 0.017  | 0.084 | -0.149 | 0.183 | 0.20  | 8.41E-01 |
|  | TMPRSS6 | rs13055107 | A | HET      | 1622 | -0.046 | 0.024 | -0.094 | 0.001 | -1.90 | 5.75E-02 |
|  | TMPRSS6 | rs13055107 | A | GENO_2DF | 1622 | NA     | NA    | NA     | NA    | 3.71  | 1.56E-01 |

|  |                |            |   |          |      |        |       |        |       |       |          |
|--|----------------|------------|---|----------|------|--------|-------|--------|-------|-------|----------|
|  | <i>TMPRSS6</i> | rs2413450  | T | HOM      | 1736 | 0.045  | 0.028 | -0.010 | 0.099 | 1.60  | 1.10E-01 |
|  | <i>TMPRSS6</i> | rs2413450  | T | HET      | 1736 | 0.012  | 0.022 | -0.032 | 0.055 | 0.52  | 6.06E-01 |
|  | <i>TMPRSS6</i> | rs2413450  | T | GENO_2DF | 1736 | NA     | NA    | NA     | NA    | 2.70  | 2.60E-01 |
|  | <i>TMPRSS6</i> | rs855789   | C | HOM      | 1819 | 0.261  | 0.279 | -0.286 | 0.808 | 0.94  | 3.50E-01 |
|  | <i>TMPRSS6</i> | rs855789   | C | HET      | 1819 | -0.023 | 0.032 | -0.085 | 0.039 | -0.74 | 4.62E-01 |
|  | <i>TMPRSS6</i> | rs855789   | C | GENO_2DF | 1819 | NA     | NA    | NA     | NA    | 1.43  | 4.89E-01 |
|  | <i>TMPRSS6</i> | rs855788   | A | HOM      | 1823 | -0.024 | 0.029 | -0.081 | 0.033 | -0.81 | 4.16E-01 |
|  | <i>TMPRSS6</i> | rs855788   | A | HET      | 1823 | -0.011 | 0.020 | -0.051 | 0.028 | -0.57 | 5.70E-01 |
|  | <i>TMPRSS6</i> | rs855788   | A | GENO_2DF | 1823 | NA     | NA    | NA     | NA    | 0.73  | 6.93E-01 |
|  | <i>TMPRSS6</i> | rs17750017 | A | HOM      | 1809 | NA     | NA    | NA     | NA    | NA    | NA       |
|  | <i>TMPRSS6</i> | rs17750017 | A | HET      | 1809 | NA     | NA    | NA     | NA    | NA    | NA       |
|  | <i>TMPRSS6</i> | rs17750017 | A | GENO_2DF | 1809 | NA     | NA    | NA     | NA    | NA    | NA       |
|  | <i>TMPRSS6</i> | rs2743820  | C | HOM      | 1593 | 0.008  | 0.032 | -0.055 | 0.072 | 0.25  | 8.01E-01 |
|  | <i>TMPRSS6</i> | rs2743820  | C | HET      | 1593 | -0.008 | 0.021 | -0.050 | 0.033 | -0.39 | 6.94E-01 |
|  | <i>TMPRSS6</i> | rs2743820  | C | GENO_2DF | 1593 | NA     | NA    | NA     | NA    | 0.33  | 8.47E-01 |
|  | <i>TMPRSS6</i> | rs1005478  | A | HOM      | 1553 | -0.012 | 0.031 | -0.074 | 0.049 | -0.39 | 6.93E-01 |
|  | <i>TMPRSS6</i> | rs1005478  | A | HET      | 1553 | 0.002  | 0.022 | -0.041 | 0.044 | 0.07  | 9.44E-01 |
|  | <i>TMPRSS6</i> | rs1005478  | A | GENO_2DF | 1553 | NA     | NA    | NA     | NA    | 0.21  | 9.02E-01 |
|  | <i>TMPRSS6</i> | rs7286184  | G | HOM      | 1564 | 0.018  | 0.047 | -0.074 | 0.109 | 0.38  | 7.07E-01 |
|  | <i>TMPRSS6</i> | rs7286184  | G | HET      | 1564 | -0.009 | 0.022 | -0.052 | 0.033 | -0.44 | 6.61E-01 |
|  | <i>TMPRSS6</i> | rs7286184  | G | GENO_2DF | 1564 | NA     | NA    | NA     | NA    | 0.40  | 8.19E-01 |
|  | <i>TMPRSS6</i> | rs2246092  | G | HOM      | 1552 | -0.012 | 0.031 | -0.074 | 0.049 | -0.40 | 6.93E-01 |
|  | <i>TMPRSS6</i> | rs2246092  | G | HET      | 1552 | 0.000  | 0.022 | -0.042 | 0.042 | 0.00  | 9.98E-01 |
|  | <i>TMPRSS6</i> | rs2246092  | G | GENO_2DF | 1552 | NA     | NA    | NA     | NA    | 0.18  | 9.14E-01 |
|  | <i>TMPRSS6</i> | rs2543519  | G | HOM      | 1578 | 0.038  | 0.041 | -0.042 | 0.119 | 0.93  | 3.52E-01 |
|  | <i>TMPRSS6</i> | rs2543519  | G | HET      | 1578 | -0.024 | 0.021 | -0.065 | 0.017 | -1.15 | 2.50E-01 |
|  | <i>TMPRSS6</i> | rs2543519  | G | GENO_2DF | 1578 | NA     | NA    | NA     | NA    | 2.73  | 2.55E-01 |
|  | <i>TMPRSS6</i> | rs2111833  | T | HOM      | 1616 | 0.006  | 0.032 | -0.056 | 0.069 | 0.20  | 8.41E-01 |
|  | <i>TMPRSS6</i> | rs2111833  | T | HET      | 1616 | -0.016 | 0.021 | -0.057 | 0.025 | -0.76 | 4.48E-01 |
|  | <i>TMPRSS6</i> | rs2111833  | T | GENO_2DF | 1616 | NA     | NA    | NA     | NA    | 0.82  | 6.62E-01 |
|  | <i>TMPRSS6</i> | rs2179229  | G | HOM      | 1568 | -0.011 | 0.031 | -0.071 | 0.050 | -0.35 | 7.26E-01 |
|  | <i>TMPRSS6</i> | rs2179229  | G | HET      | 1568 | 0.002  | 0.021 | -0.040 | 0.044 | 0.10  | 9.22E-01 |
|  | <i>TMPRSS6</i> | rs2179229  | G | GENO_2DF | 1568 | NA     | NA    | NA     | NA    | 0.18  | 9.13E-01 |

|  |                |           |   |          |      |        |       |        |       |       |          |
|--|----------------|-----------|---|----------|------|--------|-------|--------|-------|-------|----------|
|  | <i>TMPRSS6</i> | rs2235323 | C | HOM      | 1821 | 0.012  | 0.029 | -0.045 | 0.069 | 0.41  | 6.78E-01 |
|  | <i>TMPRSS6</i> | rs2235323 | C | HET      | 1821 | -0.017 | 0.020 | -0.056 | 0.023 | -0.83 | 4.06E-01 |
|  | <i>TMPRSS6</i> | rs2235323 | C | GENO_2DF | 1821 | NA     | NA    | NA     | NA    | 1.32  | 5.17E-01 |
|  | <i>TMPRSS6</i> | rs2235324 | C | HOM      | 1823 | 0.012  | 0.029 | -0.045 | 0.069 | 0.42  | 6.75E-01 |
|  | <i>TMPRSS6</i> | rs2235324 | C | HET      | 1823 | -0.017 | 0.020 | -0.056 | 0.022 | -0.85 | 3.94E-01 |
|  | <i>TMPRSS6</i> | rs2235324 | C | GENO_2DF | 1823 | NA     | NA    | NA     | NA    | 1.38  | 5.02E-01 |
|  | <i>TMPRSS6</i> | rs736852  | C | HOM      | 1809 | -0.002 | 0.028 | -0.057 | 0.054 | -0.06 | 9.56E-01 |
|  | <i>TMPRSS6</i> | rs736852  | C | HET      | 1809 | -0.008 | 0.021 | -0.048 | 0.032 | -0.38 | 7.05E-01 |
|  | <i>TMPRSS6</i> | rs736852  | C | GENO_2DF | 1809 | NA     | NA    | NA     | NA    | 0.16  | 9.25E-01 |
|  | <i>TMPRSS6</i> | rs2019848 | A | HOM      | 1759 | 0.025  | 0.043 | -0.059 | 0.109 | 0.58  | 5.62E-01 |
|  | <i>TMPRSS6</i> | rs2019848 | A | HET      | 1759 | -0.008 | 0.020 | -0.047 | 0.031 | -0.39 | 6.94E-01 |
|  | <i>TMPRSS6</i> | rs2019848 | A | GENO_2DF | 1759 | NA     | NA    | NA     | NA    | 0.59  | 7.45E-01 |
|  | <i>TMPRSS6</i> | rs1421312 | G | HOM      | 1823 | 0.004  | 0.029 | -0.052 | 0.060 | 0.14  | 8.91E-01 |
|  | <i>TMPRSS6</i> | rs1421312 | G | HET      | 1823 | -0.014 | 0.020 | -0.053 | 0.026 | -0.67 | 5.01E-01 |
|  | <i>TMPRSS6</i> | rs1421312 | G | GENO_2DF | 1823 | NA     | NA    | NA     | NA    | 0.64  | 7.25E-01 |
|  | <i>TMPRSS6</i> | rs2543514 | C | HOM      | 1814 | -0.001 | 0.028 | -0.056 | 0.055 | -0.02 | 9.82E-01 |
|  | <i>TMPRSS6</i> | rs2543514 | C | HET      | 1814 | -0.007 | 0.020 | -0.047 | 0.034 | -0.32 | 7.49E-01 |
|  | <i>TMPRSS6</i> | rs2543514 | C | GENO_2DF | 1814 | NA     | NA    | NA     | NA    | 0.12  | 9.43E-01 |
|  | <i>TMPRSS6</i> | rs2543513 | G | HOM      | 1814 | -0.001 | 0.028 | -0.056 | 0.055 | -0.02 | 9.82E-01 |
|  | <i>TMPRSS6</i> | rs2543513 | G | HET      | 1814 | -0.007 | 0.020 | -0.047 | 0.034 | -0.32 | 7.49E-01 |
|  | <i>TMPRSS6</i> | rs2543513 | G | GENO_2DF | 1814 | NA     | NA    | NA     | NA    | 0.12  | 9.43E-01 |
|  | <i>TMPRSS6</i> | rs2413451 | G | HOM      | 1814 | -0.001 | 0.028 | -0.056 | 0.055 | -0.02 | 9.82E-01 |
|  | <i>TMPRSS6</i> | rs2413451 | G | HET      | 1814 | -0.007 | 0.020 | -0.047 | 0.034 | -0.32 | 7.49E-01 |
|  | <i>TMPRSS6</i> | rs2413451 | G | GENO_2DF | 1814 | NA     | NA    | NA     | NA    | 0.12  | 9.43E-01 |
|  | <i>TMPRSS6</i> | rs2251655 | T | HOM      | 1814 | -0.001 | 0.028 | -0.056 | 0.055 | -0.02 | 9.82E-01 |
|  | <i>TMPRSS6</i> | rs2251655 | T | HET      | 1814 | -0.007 | 0.020 | -0.047 | 0.034 | -0.32 | 7.49E-01 |
|  | <i>TMPRSS6</i> | rs2251655 | T | GENO_2DF | 1814 | NA     | NA    | NA     | NA    | 0.12  | 9.43E-01 |
|  | <i>TMPRSS6</i> | rs2743824 | C | HOM      | 1812 | 0.000  | 0.028 | -0.056 | 0.055 | -0.02 | 9.87E-01 |
|  | <i>TMPRSS6</i> | rs2743824 | C | HET      | 1812 | -0.006 | 0.021 | -0.046 | 0.034 | -0.30 | 7.62E-01 |
|  | <i>TMPRSS6</i> | rs2743824 | C | GENO_2DF | 1812 | NA     | NA    | NA     | NA    | 0.11  | 9.48E-01 |
|  | <i>TMPRSS6</i> | rs2543509 | G | HOM      | 1812 | 0.000  | 0.028 | -0.056 | 0.055 | -0.02 | 9.87E-01 |
|  | <i>TMPRSS6</i> | rs2543509 | G | HET      | 1812 | -0.006 | 0.021 | -0.046 | 0.034 | -0.30 | 7.62E-01 |
|  | <i>TMPRSS6</i> | rs2543509 | G | GENO_2DF | 1812 | NA     | NA    | NA     | NA    | 0.11  | 9.48E-01 |

|  |                |           |   |          |      |        |       |        |       |       |          |
|--|----------------|-----------|---|----------|------|--------|-------|--------|-------|-------|----------|
|  | <i>TMPRSS6</i> | rs2743825 | G | HOM      | 1811 | 0.000  | 0.028 | -0.056 | 0.055 | -0.02 | 9.87E-01 |
|  | <i>TMPRSS6</i> | rs2743825 | G | HET      | 1811 | -0.006 | 0.021 | -0.046 | 0.034 | -0.30 | 7.63E-01 |
|  | <i>TMPRSS6</i> | rs2743825 | G | GENO_2DF | 1811 | NA     | NA    | NA     | NA    | 0.11  | 9.49E-01 |
|  | <i>TMPRSS6</i> | rs2160906 | A | HOM      | 1823 | 0.040  | 0.040 | -0.038 | 0.118 | 1.00  | 3.16E-01 |
|  | <i>TMPRSS6</i> | rs2160906 | A | HET      | 1823 | -0.016 | 0.020 | -0.054 | 0.022 | -0.83 | 4.08E-01 |
|  | <i>TMPRSS6</i> | rs2160906 | A | GENO_2DF | 1823 | NA     | NA    | NA     | NA    | 2.09  | 3.53E-01 |
|  | <i>TMPRSS6</i> | rs732755  | C | HOM      | 1747 | 0.037  | 0.040 | -0.041 | 0.115 | 0.92  | 3.58E-01 |
|  | <i>TMPRSS6</i> | rs732755  | C | HET      | 1747 | -0.025 | 0.020 | -0.064 | 0.014 | -1.25 | 2.11E-01 |
|  | <i>TMPRSS6</i> | rs732755  | C | GENO_2DF | 1747 | NA     | NA    | NA     | NA    | 2.97  | 2.26E-01 |
|  | <i>TMPRSS6</i> | rs8139988 | C | HOM      | 1800 | 0.042  | 0.040 | -0.036 | 0.121 | 1.05  | 2.93E-01 |
|  | <i>TMPRSS6</i> | rs8139988 | C | HET      | 1800 | -0.017 | 0.020 | -0.056 | 0.022 | -0.86 | 3.92E-01 |
|  | <i>TMPRSS6</i> | rs8139988 | C | GENO_2DF | 1800 | NA     | NA    | NA     | NA    | 2.26  | 3.22E-01 |
|  | <i>TMPRSS6</i> | rs2017764 | A | HOM      | 1791 | -0.002 | 0.029 | -0.060 | 0.055 | -0.08 | 9.36E-01 |
|  | <i>TMPRSS6</i> | rs2017764 | A | HET      | 1791 | -0.010 | 0.020 | -0.050 | 0.030 | -0.49 | 6.25E-01 |
|  | <i>TMPRSS6</i> | rs2017764 | A | GENO_2DF | 1791 | NA     | NA    | NA     | NA    | 0.25  | 8.81E-01 |
|  | <i>TMPRSS6</i> | rs733655  | C | HOM      | 1793 | 0.046  | 0.037 | -0.028 | 0.119 | 1.22  | 2.22E-01 |
|  | <i>TMPRSS6</i> | rs733655  | C | HET      | 1793 | -0.026 | 0.020 | -0.065 | 0.012 | -1.34 | 1.81E-01 |
|  | <i>TMPRSS6</i> | rs733655  | C | GENO_2DF | 1793 | NA     | NA    | NA     | NA    | 4.16  | 1.25E-01 |
|  | <i>TMPRSS6</i> | rs2281090 | A | HOM      | 1795 | 0.033  | 0.041 | -0.047 | 0.112 | 0.81  | 4.21E-01 |
|  | <i>TMPRSS6</i> | rs2281090 | A | HET      | 1795 | -0.017 | 0.020 | -0.056 | 0.022 | -0.85 | 3.96E-01 |
|  | <i>TMPRSS6</i> | rs2281090 | A | GENO_2DF | 1795 | NA     | NA    | NA     | NA    | 1.68  | 4.31E-01 |
|  | <i>TMPRSS6</i> | rs2281091 | T | HOM      | 1793 | 0.035  | 0.041 | -0.045 | 0.115 | 0.86  | 3.93E-01 |
|  | <i>TMPRSS6</i> | rs2281091 | T | HET      | 1793 | -0.017 | 0.020 | -0.056 | 0.022 | -0.85 | 3.95E-01 |
|  | <i>TMPRSS6</i> | rs2281091 | T | GENO_2DF | 1793 | NA     | NA    | NA     | NA    | 1.79  | 4.10E-01 |
|  | <i>TMPRSS6</i> | rs228906  | A | HOM      | 1824 | 0.006  | 0.029 | -0.051 | 0.063 | 0.20  | 8.42E-01 |
|  | <i>TMPRSS6</i> | rs228906  | A | HET      | 1824 | -0.007 | 0.020 | -0.046 | 0.032 | -0.37 | 7.13E-01 |
|  | <i>TMPRSS6</i> | rs228906  | A | GENO_2DF | 1824 | NA     | NA    | NA     | NA    | 0.26  | 8.77E-01 |
|  | <i>TMPRSS6</i> | rs7289616 | A | HOM      | 1769 | -0.001 | 0.030 | -0.060 | 0.057 | -0.05 | 9.60E-01 |
|  | <i>TMPRSS6</i> | rs7289616 | A | HET      | 1769 | -0.008 | 0.020 | -0.048 | 0.031 | -0.41 | 6.83E-01 |
|  | <i>TMPRSS6</i> | rs7289616 | A | GENO_2DF | 1769 | NA     | NA    | NA     | NA    | 0.18  | 9.14E-01 |
|  | <i>TMPRSS6</i> | rs9619658 | T | HOM      | 1461 | -0.023 | 0.036 | -0.093 | 0.047 | -0.65 | 5.19E-01 |
|  | <i>TMPRSS6</i> | rs9619658 | T | HET      | 1461 | -0.014 | 0.022 | -0.056 | 0.029 | -0.63 | 5.30E-01 |
|  | <i>TMPRSS6</i> | rs9619658 | T | GENO_2DF | 1461 | NA     | NA    | NA     | NA    | 0.62  | 7.32E-01 |



|  |         |            |   |          |      |        |       |        |       |       |          |
|--|---------|------------|---|----------|------|--------|-------|--------|-------|-------|----------|
|  | TMPRSS6 | rs228907   | A | HOM      | 1821 | -0.003 | 0.035 | -0.071 | 0.065 | -0.09 | 9.27E-01 |
|  | TMPRSS6 | rs228907   | A | HET      | 1821 | 0.012  | 0.020 | -0.026 | 0.051 | 0.63  | 5.28E-01 |
|  | TMPRSS6 | rs228907   | A | GENO_2DF | 1821 | NA     | NA    | NA     | NA    | 0.46  | 7.95E-01 |
|  | TMPRSS6 | rs17750152 | T | HOM      | 1081 | 0.033  | 0.057 | -0.079 | 0.144 | 0.57  | 5.66E-01 |
|  | TMPRSS6 | rs17750152 | T | HET      | 1081 | -0.016 | 0.026 | -0.066 | 0.035 | -0.61 | 5.44E-01 |
|  | TMPRSS6 | rs17750152 | T | GENO_2DF | 1081 | NA     | NA    | NA     | NA    | 0.83  | 6.61E-01 |
|  | TMPRSS6 | rs4140590  | A | HOM      | 1588 | -0.024 | 0.029 | -0.081 | 0.033 | -0.82 | 4.11E-01 |
|  | TMPRSS6 | rs4140590  | A | HET      | 1588 | -0.006 | 0.023 | -0.051 | 0.038 | -0.27 | 7.84E-01 |
|  | TMPRSS6 | rs4140590  | A | GENO_2DF | 1588 | NA     | NA    | NA     | NA    | 0.70  | 7.06E-01 |
|  | TMPRSS6 | rs4140589  | A | HOM      | 1621 | -0.021 | 0.029 | -0.078 | 0.036 | -0.73 | 4.64E-01 |
|  | TMPRSS6 | rs4140589  | A | HET      | 1621 | -0.007 | 0.022 | -0.051 | 0.038 | -0.29 | 7.73E-01 |
|  | TMPRSS6 | rs4140589  | A | GENO_2DF | 1621 | NA     | NA    | NA     | NA    | 0.54  | 7.63E-01 |
|  | TMPRSS6 | rs5995380  | T | HOM      | 1701 | 0.050  | 0.053 | -0.054 | 0.155 | 0.95  | 3.44E-01 |
|  | TMPRSS6 | rs5995380  | T | HET      | 1701 | -0.003 | 0.021 | -0.044 | 0.039 | -0.12 | 9.05E-01 |
|  | TMPRSS6 | rs5995380  | T | GENO_2DF | 1701 | NA     | NA    | NA     | NA    | 0.95  | 6.22E-01 |
|  | TMPRSS6 | rs11704654 | T | HOM      | 1743 | 0.056  | 0.051 | -0.044 | 0.155 | 1.10  | 2.73E-01 |
|  | TMPRSS6 | rs11704654 | T | HET      | 1743 | -0.005 | 0.021 | -0.046 | 0.036 | -0.25 | 8.07E-01 |
|  | TMPRSS6 | rs11704654 | T | GENO_2DF | 1743 | NA     | NA    | NA     | NA    | 1.36  | 5.08E-01 |
|  | TMPRSS6 | rs5756515  | G | HOM      | 1703 | -0.017 | 0.028 | -0.072 | 0.039 | -0.59 | 5.53E-01 |
|  | TMPRSS6 | rs5756515  | G | HET      | 1703 | -0.007 | 0.022 | -0.049 | 0.036 | -0.31 | 7.56E-01 |
|  | TMPRSS6 | rs5756515  | G | GENO_2DF | 1703 | NA     | NA    | NA     | NA    | 0.35  | 8.38E-01 |
|  | TMPRSS6 | rs5756516  | T | HOM      | 1703 | -0.017 | 0.028 | -0.072 | 0.039 | -0.59 | 5.53E-01 |
|  | TMPRSS6 | rs5756516  | T | HET      | 1703 | -0.007 | 0.022 | -0.049 | 0.036 | -0.31 | 7.56E-01 |
|  | TMPRSS6 | rs5756516  | T | GENO_2DF | 1703 | NA     | NA    | NA     | NA    | 0.35  | 8.38E-01 |
|  | TMPRSS6 | rs228909   | G | HOM      | 1823 | 0.056  | 0.046 | -0.033 | 0.146 | 1.23  | 2.18E-01 |
|  | TMPRSS6 | rs228909   | G | HET      | 1823 | -0.006 | 0.020 | -0.046 | 0.033 | -0.31 | 7.60E-01 |
|  | TMPRSS6 | rs228909   | G | GENO_2DF | 1823 | NA     | NA    | NA     | NA    | 1.76  | 4.16E-01 |
|  | TMPRSS6 | rs228910   | A | HOM      | 1823 | 0.004  | 0.028 | -0.051 | 0.060 | 0.16  | 8.74E-01 |
|  | TMPRSS6 | rs228910   | A | HET      | 1823 | -0.022 | 0.020 | -0.061 | 0.017 | -1.10 | 2.71E-01 |
|  | TMPRSS6 | rs228910   | A | GENO_2DF | 1823 | NA     | NA    | NA     | NA    | 1.61  | 4.47E-01 |
|  | TMPRSS6 | rs2235329  | C | HOM      | 1704 | -0.007 | 0.028 | -0.063 | 0.048 | -0.26 | 7.97E-01 |
|  | TMPRSS6 | rs2235329  | C | HET      | 1704 | -0.002 | 0.022 | -0.044 | 0.040 | -0.10 | 9.23E-01 |
|  | TMPRSS6 | rs2235329  | C | GENO_2DF | 1704 | NA     | NA    | NA     | NA    | 0.07  | 9.67E-01 |

|  |         |            |   |          |      |        |       |        |       |       |          |
|--|---------|------------|---|----------|------|--------|-------|--------|-------|-------|----------|
|  | TMPRSS6 | rs228913   | C | HOM      | 1823 | 0.081  | 0.051 | -0.018 | 0.180 | 1.60  | 1.09E-01 |
|  | TMPRSS6 | rs228913   | C | HET      | 1823 | -0.001 | 0.020 | -0.041 | 0.039 | -0.05 | 9.63E-01 |
|  | TMPRSS6 | rs228913   | C | GENO_2DF | 1823 | NA     | NA    | NA     | NA    | 2.63  | 2.68E-01 |
|  | TMPRSS6 | rs228916   | C | HOM      | 1810 | 0.011  | 0.085 | -0.155 | 0.177 | 0.13  | 8.94E-01 |
|  | TMPRSS6 | rs228916   | C | HET      | 1810 | -0.014 | 0.023 | -0.059 | 0.030 | -0.63 | 5.28E-01 |
|  | TMPRSS6 | rs228916   | C | GENO_2DF | 1810 | NA     | NA    | NA     | NA    | 0.43  | 8.07E-01 |
|  | TMPRSS6 | rs228918   | C | HOM      | 1822 | 0.020  | 0.027 | -0.032 | 0.073 | 0.76  | 4.46E-01 |
|  | TMPRSS6 | rs228918   | C | HET      | 1822 | -0.011 | 0.021 | -0.051 | 0.030 | -0.52 | 6.06E-01 |
|  | TMPRSS6 | rs228918   | C | GENO_2DF | 1822 | NA     | NA    | NA     | NA    | 1.48  | 4.76E-01 |
|  | TMPRSS6 | rs228919   | T | HOM      | 1822 | 0.021  | 0.027 | -0.031 | 0.074 | 0.80  | 4.23E-01 |
|  | TMPRSS6 | rs228919   | T | HET      | 1822 | -0.010 | 0.021 | -0.050 | 0.030 | -0.48 | 6.31E-01 |
|  | TMPRSS6 | rs228919   | T | GENO_2DF | 1822 | NA     | NA    | NA     | NA    | 1.51  | 4.71E-01 |
|  | TMPRSS6 | rs2092169  | T | HOM      | 1142 | 0.212  | 0.165 | -0.111 | 0.535 | 1.29  | 1.98E-01 |
|  | TMPRSS6 | rs2092169  | T | HET      | 1142 | -0.014 | 0.033 | -0.080 | 0.051 | -0.43 | 6.66E-01 |
|  | TMPRSS6 | rs2092169  | T | GENO_2DF | 1142 | NA     | NA    | NA     | NA    | 1.88  | 3.91E-01 |
|  | TMPRSS6 | rs228921   | G | HOM      | 1821 | 0.021  | 0.027 | -0.031 | 0.074 | 0.80  | 4.23E-01 |
|  | TMPRSS6 | rs228921   | G | HET      | 1821 | -0.010 | 0.021 | -0.050 | 0.030 | -0.48 | 6.30E-01 |
|  | TMPRSS6 | rs228921   | G | GENO_2DF | 1821 | NA     | NA    | NA     | NA    | 1.51  | 4.71E-01 |
|  | TMPRSS6 | rs3076475  | T | HOM      | 1080 | 0.027  | 0.059 | -0.088 | 0.142 | 0.46  | 6.44E-01 |
|  | TMPRSS6 | rs3076475  | T | HET      | 1080 | -0.018 | 0.026 | -0.069 | 0.033 | -0.70 | 4.82E-01 |
|  | TMPRSS6 | rs3076475  | T | GENO_2DF | 1080 | NA     | NA    | NA     | NA    | 0.83  | 6.59E-01 |
|  | TMPRSS6 | rs228924   | A | HOM      | 1823 | 0.011  | 0.085 | -0.155 | 0.177 | 0.13  | 8.94E-01 |
|  | TMPRSS6 | rs228924   | A | HET      | 1823 | -0.017 | 0.022 | -0.061 | 0.027 | -0.76 | 4.45E-01 |
|  | TMPRSS6 | rs228924   | A | GENO_2DF | 1823 | NA     | NA    | NA     | NA    | 0.62  | 7.35E-01 |
|  | TMPRSS6 | rs228925   | A | HOM      | 1141 | 0.043  | 0.053 | -0.062 | 0.148 | 0.80  | 4.22E-01 |
|  | TMPRSS6 | rs228925   | A | HET      | 1141 | -0.037 | 0.025 | -0.087 | 0.013 | -1.45 | 1.47E-01 |
|  | TMPRSS6 | rs228925   | A | GENO_2DF | 1141 | NA     | NA    | NA     | NA    | 3.26  | 1.96E-01 |
|  | TMPRSS6 | rs5756520  | A | HOM      | 1819 | 0.021  | 0.027 | -0.031 | 0.074 | 0.80  | 4.23E-01 |
|  | TMPRSS6 | rs5756520  | A | HET      | 1819 | -0.010 | 0.021 | -0.050 | 0.031 | -0.48 | 6.31E-01 |
|  | TMPRSS6 | rs5756520  | A | GENO_2DF | 1819 | NA     | NA    | NA     | NA    | 1.50  | 4.71E-01 |
|  | TMPRSS6 | rs11914132 | T | HOM      | 1824 | 0.062  | 0.038 | -0.013 | 0.137 | 1.62  | 1.06E-01 |
|  | TMPRSS6 | rs11914132 | T | HET      | 1824 | -0.032 | 0.020 | -0.071 | 0.006 | -1.64 | 1.01E-01 |
|  | TMPRSS6 | rs11914132 | T | GENO_2DF | 1824 | NA     | NA    | NA     | NA    | 6.53  | 3.81E-02 |

|                        |                |            |   |          |      |        |       |        |        |       |          |
|------------------------|----------------|------------|---|----------|------|--------|-------|--------|--------|-------|----------|
|                        | <i>TMPRSS6</i> | rs738297   | C | HOM      | 1812 | 0.072  | 0.052 | -0.029 | 0.174  | 1.40  | 1.62E-01 |
|                        | <i>TMPRSS6</i> | rs738297   | C | HET      | 1812 | -0.005 | 0.021 | -0.046 | 0.035  | -0.25 | 8.00E-01 |
|                        | <i>TMPRSS6</i> | rs738297   | C | GENO_2DF | 1812 | NA     | NA    | NA     | NA     | 2.13  | 3.44E-01 |
|                        | <i>TMPRSS6</i> | rs11089823 | C | HOM      | 1815 | 0.064  | 0.038 | -0.011 | 0.139  | 1.66  | 9.64E-02 |
|                        | <i>TMPRSS6</i> | rs11089823 | C | HET      | 1815 | -0.033 | 0.020 | -0.072 | 0.006  | -1.68 | 9.26E-02 |
|                        | <i>TMPRSS6</i> | rs11089823 | C | GENO_2DF | 1815 | NA     | NA    | NA     | NA     | 6.90  | 3.18E-02 |
|                        | <i>TMPRSS6</i> | rs11089824 | C | HOM      | 1815 | 0.064  | 0.038 | -0.011 | 0.139  | 1.66  | 9.64E-02 |
|                        | <i>TMPRSS6</i> | rs11089824 | C | HET      | 1815 | -0.033 | 0.020 | -0.072 | 0.006  | -1.68 | 9.26E-02 |
|                        | <i>TMPRSS6</i> | rs11089824 | C | GENO_2DF | 1815 | NA     | NA    | NA     | NA     | 6.90  | 3.18E-02 |
| log(hepcidin/ferritin) | <i>HFE</i>     | rs9295687  | C | HOM      | 1763 | -0.051 | 0.018 | -0.086 | -0.016 | -2.84 | 4.62E-03 |
|                        | <i>HFE</i>     | rs9295687  | C | HET      | 1763 | -0.011 | 0.013 | -0.037 | 0.015  | -0.81 | 4.21E-01 |
|                        | <i>HFE</i>     | rs9295687  | C | GENO_2DF | 1763 | NA     | NA    | NA     | NA     | 8.23  | 1.64E-02 |
|                        | <i>HFE</i>     | rs4529296  | G | HOM      | 1763 | -0.051 | 0.018 | -0.086 | -0.016 | -2.84 | 4.62E-03 |
|                        | <i>HFE</i>     | rs4529296  | G | HET      | 1763 | -0.011 | 0.013 | -0.037 | 0.015  | -0.81 | 4.21E-01 |
|                        | <i>HFE</i>     | rs4529296  | G | GENO_2DF | 1763 | NA     | NA    | NA     | NA     | 8.23  | 1.64E-02 |
|                        | <i>HFE</i>     | rs9379825  | A | HOM      | 1763 | -0.051 | 0.018 | -0.086 | -0.016 | -2.84 | 4.62E-03 |
|                        | <i>HFE</i>     | rs9379825  | A | HET      | 1763 | -0.011 | 0.013 | -0.037 | 0.015  | -0.81 | 4.21E-01 |
|                        | <i>HFE</i>     | rs9379825  | A | GENO_2DF | 1763 | NA     | NA    | NA     | NA     | 8.23  | 1.64E-02 |
|                        | <i>HFE</i>     | rs9467672  | T | HOM      | 1763 | -0.051 | 0.018 | -0.086 | -0.016 | -2.84 | 4.62E-03 |
|                        | <i>HFE</i>     | rs9467672  | T | HET      | 1763 | -0.011 | 0.013 | -0.037 | 0.015  | -0.81 | 4.21E-01 |
|                        | <i>HFE</i>     | rs9467672  | T | GENO_2DF | 1763 | NA     | NA    | NA     | NA     | 8.23  | 1.64E-02 |
|                        | <i>HFE</i>     | rs9295688  | A | HOM      | 1762 | -0.051 | 0.018 | -0.086 | -0.016 | -2.83 | 4.74E-03 |
|                        | <i>HFE</i>     | rs9295688  | A | HET      | 1762 | -0.011 | 0.013 | -0.037 | 0.015  | -0.81 | 4.21E-01 |
|                        | <i>HFE</i>     | rs9295688  | A | GENO_2DF | 1762 | NA     | NA    | NA     | NA     | 8.18  | 1.68E-02 |
|                        | <i>HFE</i>     | rs2006736  | T | HOM      | 1762 | -0.051 | 0.018 | -0.086 | -0.016 | -2.83 | 4.74E-03 |
|                        | <i>HFE</i>     | rs2006736  | T | HET      | 1762 | -0.011 | 0.013 | -0.037 | 0.015  | -0.81 | 4.21E-01 |
|                        | <i>HFE</i>     | rs2006736  | T | GENO_2DF | 1762 | NA     | NA    | NA     | NA     | 8.18  | 1.68E-02 |
|                        | <i>HFE</i>     | rs1800702  | G | HOM      | 1762 | -0.051 | 0.018 | -0.086 | -0.016 | -2.83 | 4.74E-03 |
|                        | <i>HFE</i>     | rs1800702  | G | HET      | 1762 | -0.011 | 0.013 | -0.037 | 0.015  | -0.81 | 4.21E-01 |
|                        | <i>HFE</i>     | rs1800702  | G | GENO_2DF | 1762 | NA     | NA    | NA     | NA     | 8.18  | 1.68E-02 |
|                        | <i>HFE</i>     | rs2794720  | C | HOM      | 1762 | -0.051 | 0.018 | -0.086 | -0.016 | -2.83 | 4.74E-03 |
|                        | <i>HFE</i>     | rs2794720  | C | HET      | 1762 | -0.011 | 0.013 | -0.037 | 0.015  | -0.81 | 4.21E-01 |
|                        | <i>HFE</i>     | rs2794720  | C | GENO_2DF | 1762 | NA     | NA    | NA     | NA     | 8.18  | 1.68E-02 |

|  |     |           |   |          |          |        |       |        |        |       |          |
|--|-----|-----------|---|----------|----------|--------|-------|--------|--------|-------|----------|
|  | HFE | rs2794719 | G | HOM      | 1762     | -0.051 | 0.018 | -0.086 | -0.016 | -2.83 | 4.74E-03 |
|  | HFE | rs2794719 | G | HET      | 1762     | -0.011 | 0.013 | -0.037 | 0.015  | -0.81 | 4.21E-01 |
|  | HFE | rs2794719 | G | GENO_2DF | 1762     | NA     | NA    | NA     | NA     | 8.18  | 1.68E-02 |
|  | HFE | rs9366637 | T | HOM      | 1822     | 0.038  | 0.097 | -0.152 | 0.228  | 0.39  | 6.94E-01 |
|  | HFE | rs9366637 | T | HET      | 1822     | 0.008  | 0.020 | -0.030 | 0.047  | 0.43  | 6.70E-01 |
|  | HFE | rs9366637 | T | GENO_2DF | 1822     | NA     | NA    | NA     | NA     | 0.33  | 8.48E-01 |
|  | HFE | rs1799945 | G | HOM      | 1773     | -0.081 | 0.035 | -0.150 | -0.012 | -2.32 | 2.07E-02 |
|  | HFE | rs1799945 | G | HET      | 1773     | -0.037 | 0.014 | -0.065 | -0.009 | -2.61 | 9.10E-03 |
|  | HFE | rs1799945 | G | GENO_2DF | 1773     | NA     | NA    | NA     | NA     | 11.09 | 3.91E-03 |
|  | HFE | rs2071303 | C | HOM      | 1822     | -0.003 | 0.019 | -0.041 | 0.035  | -0.16 | 8.70E-01 |
|  | HFE | rs2071303 | C | HET      | 1822     | -0.009 | 0.013 | -0.034 | 0.017  | -0.67 | 5.05E-01 |
|  | HFE | rs2071303 | C | GENO_2DF | 1822     | NA     | NA    | NA     | NA     | 0.45  | 7.98E-01 |
|  | HFE | rs1800562 | A | HOM      | 1822     | -0.654 | 0.127 | -0.902 | -0.405 | -5.15 | 2.83E-07 |
|  | HFE | rs1800562 | A | HET      | 1822     | -0.043 | 0.018 | -0.079 | -0.007 | -2.33 | 1.98E-02 |
|  | HFE | rs1800562 | A | GENO_2DF | 1822     | NA     | NA    | NA     | NA     | 31.64 | 1.35E-07 |
|  | HFE | rs1800708 | C | HOM      | 1821     | -0.001 | 0.105 | -0.206 | 0.204  | -0.01 | 9.92E-01 |
|  | HFE | rs1800708 | C | HET      | 1821     | 0.015  | 0.019 | -0.023 | 0.053  | 0.79  | 4.30E-01 |
|  | HFE | rs1800708 | C | GENO_2DF | 1821     | NA     | NA    | NA     | NA     | 0.62  | 7.32E-01 |
|  | HFE | rs2858996 | T | HOM      | 1821     | -0.053 | 0.032 | -0.116 | 0.010  | -1.64 | 1.02E-01 |
|  | HFE | rs2858996 | T | HET      | 1821     | 0.000  | 0.013 | -0.025 | 0.025  | 0.01  | 9.90E-01 |
|  | HFE | rs2858996 | T | GENO_2DF | 1821     | NA     | NA    | NA     | NA     | 2.74  | 2.55E-01 |
|  | HFE | rs1572982 | A | HOM      | 1822     | -0.007 | 0.017 | -0.041 | 0.027  | -0.42 | 6.74E-01 |
|  | HFE | rs1572982 | A | HET      | 1.82E+03 | -0.021 | 0.014 | -0.048 | 0.007  | -1.48 | 1.38E-01 |
|  | HFE | rs1572982 | A | GENO_2DF | 1822     | NA     | NA    | NA     | NA     | 2.36  | 3.07E-01 |
|  | HFE | rs707889  | A | HOM      | 1822     | -0.053 | 0.032 | -0.116 | 0.011  | -1.64 | 1.02E-01 |
|  | HFE | rs707889  | A | HET      | 1822     | 0.001  | 0.013 | -0.024 | 0.026  | 0.06  | 9.51E-01 |
|  | HFE | rs707889  | A | GENO_2DF | 1822     | NA     | NA    | NA     | NA     | 2.76  | 2.52E-01 |
|  | HFE | rs1045537 | C | HOM      | 1771     | -0.013 | 0.045 | -0.101 | 0.075  | -0.29 | 7.72E-01 |
|  | HFE | rs1045537 | C | HET      | 1771     | 0.048  | 0.015 | 0.019  | 0.077  | 3.29  | 1.03E-03 |
|  | HFE | rs1045537 | C | GENO_2DF | 1771     | NA     | NA    | NA     | NA     | 11.09 | 3.91E-03 |
|  | HFE | rs12346   | T | HOM      | 1822     | 0.028  | 0.020 | -0.012 | 0.068  | 1.38  | 1.68E-01 |
|  | HFE | rs12346   | T | HET      | 1822     | 0.009  | 0.013 | -0.016 | 0.034  | 0.71  | 4.75E-01 |
|  | HFE | rs12346   | T | GENO_2DF | 1822     | NA     | NA    | NA     | NA     | 1.99  | 3.70E-01 |

|  |     |            |   |          |      |        |       |        |        |       |          |
|--|-----|------------|---|----------|------|--------|-------|--------|--------|-------|----------|
|  | HFE | rs17596719 | A | HOM      | 1820 | -0.085 | 0.058 | -0.198 | 0.028  | -1.47 | 1.41E-01 |
|  | HFE | rs17596719 | A | HET      | 1820 | 0.003  | 0.015 | -0.026 | 0.033  | 0.23  | 8.17E-01 |
|  | HFE | rs17596719 | A | GENO_2DF | 1820 | NA     | NA    | NA     | NA     | 2.27  | 3.22E-01 |
|  | HFE | rs6918586  | C | HOM      | 1819 | -0.013 | 0.018 | -0.048 | 0.022  | -0.75 | 4.55E-01 |
|  | HFE | rs6918586  | C | HET      | 1819 | -0.022 | 0.013 | -0.048 | 0.003  | -1.70 | 8.93E-02 |
|  | HFE | rs6918586  | C | GENO_2DF | 1819 | NA     | NA    | NA     | NA     | 2.89  | 2.36E-01 |
|  | HFE | rs9393685  | C | HOM      | 1815 | -0.002 | 0.105 | -0.207 | 0.203  | -0.02 | 9.87E-01 |
|  | HFE | rs9393685  | C | HET      | 1815 | 0.009  | 0.019 | -0.028 | 0.045  | 0.46  | 6.48E-01 |
|  | HFE | rs9393685  | C | GENO_2DF | 1815 | NA     | NA    | NA     | NA     | 0.21  | 9.01E-01 |
|  | HFE | rs1150659  | A | HOM      | 1820 | -0.049 | 0.032 | -0.112 | 0.014  | -1.53 | 1.27E-01 |
|  | HFE | rs1150659  | A | HET      | 1820 | 0.000  | 0.013 | -0.025 | 0.026  | 0.04  | 9.70E-01 |
|  | HFE | rs1150659  | A | GENO_2DF | 1820 | NA     | NA    | NA     | NA     | 2.39  | 3.02E-01 |
|  | HFE | rs1150660  | A | HOM      | 1822 | 0.028  | 0.020 | -0.012 | 0.068  | 1.38  | 1.68E-01 |
|  | HFE | rs1150660  | A | HET      | 1822 | 0.009  | 0.013 | -0.016 | 0.034  | 0.71  | 4.75E-01 |
|  | HFE | rs1150660  | A | GENO_2DF | 1822 | NA     | NA    | NA     | NA     | 1.99  | 3.70E-01 |
|  | HFE | rs198857   | G | HOM      | 1820 | -0.007 | 0.017 | -0.041 | 0.026  | -0.42 | 6.72E-01 |
|  | HFE | rs198857   | G | HET      | 1820 | -0.021 | 0.014 | -0.048 | 0.007  | -1.49 | 1.37E-01 |
|  | HFE | rs198857   | G | GENO_2DF | 1820 | NA     | NA    | NA     | NA     | 2.38  | 3.05E-01 |
|  | HFE | rs198856   | G | HOM      | 1820 | -0.007 | 0.017 | -0.041 | 0.026  | -0.42 | 6.72E-01 |
|  | HFE | rs198856   | G | HET      | 1820 | -0.021 | 0.014 | -0.048 | 0.007  | -1.49 | 1.37E-01 |
|  | HFE | rs198856   | G | GENO_2DF | 1820 | NA     | NA    | NA     | NA     | 2.38  | 3.05E-01 |
|  | HFE | rs1543680  | A | HOM      | 1816 | -0.050 | 0.032 | -0.113 | 0.013  | -1.54 | 1.23E-01 |
|  | HFE | rs1543680  | A | HET      | 1816 | 0.002  | 0.013 | -0.024 | 0.027  | 0.12  | 9.05E-01 |
|  | HFE | rs1543680  | A | GENO_2DF | 1816 | NA     | NA    | NA     | NA     | 2.49  | 2.87E-01 |
|  | HFE | rs198855   | A | HOM      | 1773 | -0.060 | 0.024 | -0.106 | -0.013 | -2.52 | 1.18E-02 |
|  | HFE | rs198855   | A | HET      | 1773 | -0.025 | 0.013 | -0.051 | 0.000  | -1.98 | 4.79E-02 |
|  | HFE | rs198855   | A | GENO_2DF | 1773 | NA     | NA    | NA     | NA     | 8.50  | 1.43E-02 |
|  | HFE | rs7743957  | C | HOM      | 1815 | -0.002 | 0.105 | -0.207 | 0.203  | -0.02 | 9.87E-01 |
|  | HFE | rs7743957  | C | HET      | 1815 | 0.009  | 0.019 | -0.028 | 0.045  | 0.46  | 6.48E-01 |
|  | HFE | rs7743957  | C | GENO_2DF | 1815 | NA     | NA    | NA     | NA     | 0.21  | 9.01E-01 |
|  | HFE | rs198854   | T | HOM      | 1821 | -0.008 | 0.017 | -0.042 | 0.026  | -0.45 | 6.50E-01 |
|  | HFE | rs198854   | T | HET      | 1821 | -0.021 | 0.014 | -0.048 | 0.007  | -1.49 | 1.37E-01 |
|  | HFE | rs198854   | T | GENO_2DF | 1821 | NA     | NA    | NA     | NA     | 2.35  | 3.09E-01 |

|  |                |           |   |          |      |        |       |        |        |       |          |
|--|----------------|-----------|---|----------|------|--------|-------|--------|--------|-------|----------|
|  | <i>HFE</i>     | rs198853  | C | HOM      | 1822 | 0.028  | 0.020 | -0.012 | 0.068  | 1.38  | 1.68E-01 |
|  | <i>HFE</i>     | rs198853  | C | HET      | 1822 | 0.009  | 0.013 | -0.016 | 0.034  | 0.71  | 4.75E-01 |
|  | <i>HFE</i>     | rs198853  | C | GENO_2DF | 1822 | NA     | NA    | NA     | NA     | 1.99  | 3.70E-01 |
|  | <i>HFE</i>     | rs2229768 | C | HOM      | 1821 | -0.049 | 0.032 | -0.112 | 0.014  | -1.52 | 1.28E-01 |
|  | <i>HFE</i>     | rs2229768 | C | HET      | 1821 | 0.001  | 0.013 | -0.024 | 0.026  | 0.05  | 9.60E-01 |
|  | <i>HFE</i>     | rs2229768 | C | GENO_2DF | 1821 | NA     | NA    | NA     | NA     | 2.39  | 3.03E-01 |
|  | <i>HFE</i>     | rs198852  | G | HOM      | 1822 | -0.002 | 0.018 | -0.037 | 0.034  | -0.10 | 9.21E-01 |
|  | <i>HFE</i>     | rs198852  | G | HET      | 1822 | -0.007 | 0.013 | -0.033 | 0.019  | -0.54 | 5.87E-01 |
|  | <i>HFE</i>     | rs198852  | G | GENO_2DF | 1822 | NA     | NA    | NA     | NA     | 0.31  | 8.55E-01 |
|  | <i>HFE</i>     | rs198851  | T | HOM      | 1662 | -0.068 | 0.040 | -0.147 | 0.010  | -1.70 | 8.95E-02 |
|  | <i>HFE</i>     | rs198851  | T | HET      | 1662 | -0.027 | 0.015 | -0.057 | 0.003  | -1.78 | 7.52E-02 |
|  | <i>HFE</i>     | rs198851  | T | GENO_2DF | 1662 | NA     | NA    | NA     | NA     | 5.59  | 6.11E-02 |
|  | <i>HFE</i>     | rs198848  | T | HOM      | 1822 | -0.002 | 0.018 | -0.037 | 0.034  | -0.10 | 9.21E-01 |
|  | <i>HFE</i>     | rs198848  | T | HET      | 1822 | -0.007 | 0.013 | -0.033 | 0.019  | -0.54 | 5.87E-01 |
|  | <i>HFE</i>     | rs198848  | T | GENO_2DF | 1822 | NA     | NA    | NA     | NA     | 0.31  | 8.55E-01 |
|  | <i>TMPRSS6</i> | rs2235320 | T | HOM      | 1821 | 0.182  | 0.049 | 0.085  | 0.279  | 3.68  | 2.45E-04 |
|  | <i>TMPRSS6</i> | rs2235320 | T | HET      | 1821 | 0.021  | 0.014 | -0.007 | 0.050  | 1.49  | 1.35E-01 |
|  | <i>TMPRSS6</i> | rs2235320 | T | GENO_2DF | 1821 | NA     | NA    | NA     | NA     | 15.07 | 5.33E-04 |
|  | <i>TMPRSS6</i> | rs2235321 | A | HOM      | 1577 | -0.035 | 0.021 | -0.077 | 0.007  | -1.63 | 1.04E-01 |
|  | <i>TMPRSS6</i> | rs2235321 | A | HET      | 1577 | -0.017 | 0.014 | -0.044 | 0.010  | -1.25 | 2.10E-01 |
|  | <i>TMPRSS6</i> | rs2235321 | A | GENO_2DF | 1577 | NA     | NA    | NA     | NA     | 3.18  | 2.04E-01 |
|  | <i>TMPRSS6</i> | rs855791  | A | HOM      | 1822 | 0.083  | 0.017 | 0.049  | 0.117  | 4.81  | 1.67E-06 |
|  | <i>TMPRSS6</i> | rs855791  | A | HET      | 1822 | 0.040  | 0.014 | 0.012  | 0.067  | 2.86  | 4.31E-03 |
|  | <i>TMPRSS6</i> | rs855791  | A | GENO_2DF | 1822 | NA     | NA    | NA     | NA     | 23.33 | 8.60E-06 |
|  | <i>TMPRSS6</i> | rs5756504 | T | HOM      | 1621 | -0.047 | 0.022 | -0.090 | -0.004 | -2.17 | 3.05E-02 |
|  | <i>TMPRSS6</i> | rs5756504 | T | HET      | 1621 | -0.023 | 0.013 | -0.049 | 0.004  | -1.69 | 9.19E-02 |
|  | <i>TMPRSS6</i> | rs5756504 | T | GENO_2DF | 1621 | NA     | NA    | NA     | NA     | 5.74  | 5.66E-02 |
|  | <i>TMPRSS6</i> | rs5756505 | C | HOM      | 1665 | -0.053 | 0.020 | -0.093 | -0.013 | -2.62 | 8.99E-03 |
|  | <i>TMPRSS6</i> | rs5756505 | C | HET      | 1665 | -0.025 | 0.013 | -0.051 | 0.002  | -1.82 | 6.83E-02 |
|  | <i>TMPRSS6</i> | rs5756505 | C | GENO_2DF | 1665 | NA     | NA    | NA     | NA     | 7.65  | 2.18E-02 |
|  | <i>TMPRSS6</i> | rs5756506 | C | HOM      | 1653 | -0.048 | 0.021 | -0.089 | -0.006 | -2.24 | 2.50E-02 |
|  | <i>TMPRSS6</i> | rs5756506 | C | HET      | 1653 | -0.024 | 0.013 | -0.050 | 0.002  | -1.78 | 7.52E-02 |
|  | <i>TMPRSS6</i> | rs5756506 | C | GENO_2DF | 1653 | NA     | NA    | NA     | NA     | 6.21  | 4.48E-02 |

|  |         |            |   |          |      |        |       |        |        |       |          |
|--|---------|------------|---|----------|------|--------|-------|--------|--------|-------|----------|
|  | TMPRSS6 | rs4820268  | G | HOM      | 1817 | 0.079  | 0.017 | 0.045  | 0.113  | 4.57  | 5.23E-06 |
|  | TMPRSS6 | rs4820268  | G | HET      | 1817 | 0.040  | 0.014 | 0.012  | 0.068  | 2.82  | 4.94E-03 |
|  | TMPRSS6 | rs4820268  | G | GENO_2DF | 1817 | NA     | NA    | NA     | NA     | 21.06 | 2.68E-05 |
|  | TMPRSS6 | rs13055107 | A | HOM      | 1621 | -0.023 | 0.054 | -0.130 | 0.084  | -0.43 | 6.70E-01 |
|  | TMPRSS6 | rs13055107 | A | HET      | 1621 | -0.053 | 0.016 | -0.083 | -0.022 | -3.33 | 8.81E-04 |
|  | TMPRSS6 | rs13055107 | A | GENO_2DF | 1621 | NA     | NA    | NA     | NA     | 11.16 | 3.78E-03 |
|  | TMPRSS6 | rs2413450  | T | HOM      | 1735 | 0.076  | 0.018 | 0.041  | 0.111  | 4.22  | 2.59E-05 |
|  | TMPRSS6 | rs2413450  | T | HET      | 1735 | 0.038  | 0.014 | 0.010  | 0.066  | 2.62  | 8.77E-03 |
|  | TMPRSS6 | rs2413450  | T | GENO_2DF | 1735 | NA     | NA    | NA     | NA     | 18.05 | 1.21E-04 |
|  | TMPRSS6 | rs855789   | C | HOM      | 1817 | -0.003 | 0.181 | -0.358 | 0.351  | -0.02 | 9.85E-01 |
|  | TMPRSS6 | rs855789   | C | HET      | 1817 | -0.016 | 0.020 | -0.057 | 0.024  | -0.80 | 4.21E-01 |
|  | TMPRSS6 | rs855789   | C | GENO_2DF | 1817 | NA     | NA    | NA     | NA     | 0.65  | 7.23E-01 |
|  | TMPRSS6 | rs855788   | A | HOM      | 1821 | -0.035 | 0.019 | -0.072 | 0.002  | -1.84 | 6.60E-02 |
|  | TMPRSS6 | rs855788   | A | HET      | 1821 | -0.016 | 0.013 | -0.041 | 0.010  | -1.20 | 2.31E-01 |
|  | TMPRSS6 | rs855788   | A | GENO_2DF | 1821 | NA     | NA    | NA     | NA     | 3.65  | 1.62E-01 |
|  | TMPRSS6 | rs17750017 | A | HOM      | 1807 | NA     | NA    | NA     | NA     | NA    | NA       |
|  | TMPRSS6 | rs17750017 | A | HET      | 1807 | NA     | NA    | NA     | NA     | NA    | NA       |
|  | TMPRSS6 | rs17750017 | A | GENO_2DF | 1807 | NA     | NA    | NA     | NA     | NA    | NA       |
|  | TMPRSS6 | rs2743820  | C | HOM      | 1591 | -0.016 | 0.021 | -0.057 | 0.025  | -0.76 | 4.50E-01 |
|  | TMPRSS6 | rs2743820  | C | HET      | 1591 | -0.013 | 0.014 | -0.040 | 0.014  | -0.97 | 3.35E-01 |
|  | TMPRSS6 | rs2743820  | C | GENO_2DF | 1591 | NA     | NA    | NA     | NA     | 1.13  | 5.69E-01 |
|  | TMPRSS6 | rs1005478  | A | HOM      | 1551 | 0.022  | 0.020 | -0.018 | 0.062  | 1.08  | 2.83E-01 |
|  | TMPRSS6 | rs1005478  | A | HET      | 1551 | 0.006  | 0.014 | -0.021 | 0.034  | 0.46  | 6.44E-01 |
|  | TMPRSS6 | rs1005478  | A | GENO_2DF | 1551 | NA     | NA    | NA     | NA     | 1.16  | 5.59E-01 |
|  | TMPRSS6 | rs7286184  | G | HOM      | 1562 | 0.050  | 0.030 | -0.009 | 0.108  | 1.66  | 9.66E-02 |
|  | TMPRSS6 | rs7286184  | G | HET      | 1562 | -0.002 | 0.014 | -0.029 | 0.025  | -0.12 | 9.05E-01 |
|  | TMPRSS6 | rs7286184  | G | GENO_2DF | 1562 | NA     | NA    | NA     | NA     | 2.92  | 2.32E-01 |
|  | TMPRSS6 | rs2246092  | G | HOM      | 1550 | 0.020  | 0.020 | -0.020 | 0.060  | 0.98  | 3.25E-01 |
|  | TMPRSS6 | rs2246092  | G | HET      | 1550 | 0.007  | 0.014 | -0.020 | 0.035  | 0.53  | 5.98E-01 |
|  | TMPRSS6 | rs2246092  | G | GENO_2DF | 1550 | NA     | NA    | NA     | NA     | 1.00  | 6.06E-01 |
|  | TMPRSS6 | rs2543519  | G | HOM      | 1576 | 0.022  | 0.027 | -0.030 | 0.074  | 0.82  | 4.10E-01 |
|  | TMPRSS6 | rs2543519  | G | HET      | 1576 | -0.006 | 0.014 | -0.033 | 0.021  | -0.45 | 6.55E-01 |
|  | TMPRSS6 | rs2543519  | G | GENO_2DF | 1576 | NA     | NA    | NA     | NA     | 1.07  | 5.86E-01 |

|  |                |           |   |          |      |        |       |        |       |       |          |
|--|----------------|-----------|---|----------|------|--------|-------|--------|-------|-------|----------|
|  | <i>TMPRSS6</i> | rs2111833 | T | HOM      | 1614 | -0.012 | 0.021 | -0.053 | 0.028 | -0.60 | 5.50E-01 |
|  | <i>TMPRSS6</i> | rs2111833 | T | HET      | 1614 | -0.012 | 0.014 | -0.039 | 0.015 | -0.89 | 3.72E-01 |
|  | <i>TMPRSS6</i> | rs2111833 | T | GENO_2DF | 1614 | NA     | NA    | NA     | NA    | 0.89  | 6.41E-01 |
|  | <i>TMPRSS6</i> | rs2179229 | G | HOM      | 1566 | 0.013  | 0.020 | -0.027 | 0.052 | 0.63  | 5.27E-01 |
|  | <i>TMPRSS6</i> | rs2179229 | G | HET      | 1566 | 0.008  | 0.014 | -0.019 | 0.036 | 0.61  | 5.45E-01 |
|  | <i>TMPRSS6</i> | rs2179229 | G | GENO_2DF | 1566 | NA     | NA    | NA     | NA    | 0.56  | 7.55E-01 |
|  | <i>TMPRSS6</i> | rs2235323 | C | HOM      | 1819 | -0.013 | 0.019 | -0.050 | 0.024 | -0.67 | 5.03E-01 |
|  | <i>TMPRSS6</i> | rs2235323 | C | HET      | 1819 | -0.011 | 0.013 | -0.036 | 0.014 | -0.84 | 3.98E-01 |
|  | <i>TMPRSS6</i> | rs2235323 | C | GENO_2DF | 1819 | NA     | NA    | NA     | NA    | 0.85  | 6.52E-01 |
|  | <i>TMPRSS6</i> | rs2235324 | C | HOM      | 1821 | -0.013 | 0.019 | -0.050 | 0.024 | -0.68 | 5.00E-01 |
|  | <i>TMPRSS6</i> | rs2235324 | C | HET      | 1821 | -0.011 | 0.013 | -0.037 | 0.014 | -0.87 | 3.85E-01 |
|  | <i>TMPRSS6</i> | rs2235324 | C | GENO_2DF | 1821 | NA     | NA    | NA     | NA    | 0.89  | 6.40E-01 |
|  | <i>TMPRSS6</i> | rs736852  | C | HOM      | 1807 | -0.027 | 0.018 | -0.063 | 0.009 | -1.46 | 1.44E-01 |
|  | <i>TMPRSS6</i> | rs736852  | C | HET      | 1807 | -0.012 | 0.013 | -0.038 | 0.014 | -0.89 | 3.74E-01 |
|  | <i>TMPRSS6</i> | rs736852  | C | GENO_2DF | 1807 | NA     | NA    | NA     | NA    | 2.22  | 3.29E-01 |
|  | <i>TMPRSS6</i> | rs2019848 | A | HOM      | 1757 | 0.025  | 0.028 | -0.029 | 0.079 | 0.90  | 3.69E-01 |
|  | <i>TMPRSS6</i> | rs2019848 | A | HET      | 1757 | 0.008  | 0.013 | -0.018 | 0.033 | 0.59  | 5.58E-01 |
|  | <i>TMPRSS6</i> | rs2019848 | A | GENO_2DF | 1757 | NA     | NA    | NA     | NA    | 1.00  | 6.07E-01 |
|  | <i>TMPRSS6</i> | rs1421312 | G | HOM      | 1821 | -0.021 | 0.019 | -0.058 | 0.015 | -1.14 | 2.56E-01 |
|  | <i>TMPRSS6</i> | rs1421312 | G | HET      | 1821 | -0.010 | 0.013 | -0.035 | 0.016 | -0.74 | 4.57E-01 |
|  | <i>TMPRSS6</i> | rs1421312 | G | GENO_2DF | 1821 | NA     | NA    | NA     | NA    | 1.40  | 4.98E-01 |
|  | <i>TMPRSS6</i> | rs2543514 | C | HOM      | 1812 | -0.026 | 0.018 | -0.062 | 0.010 | -1.41 | 1.60E-01 |
|  | <i>TMPRSS6</i> | rs2543514 | C | HET      | 1812 | -0.010 | 0.013 | -0.036 | 0.016 | -0.79 | 4.29E-01 |
|  | <i>TMPRSS6</i> | rs2543514 | C | GENO_2DF | 1812 | NA     | NA    | NA     | NA    | 2.02  | 3.64E-01 |
|  | <i>TMPRSS6</i> | rs2543513 | G | HOM      | 1812 | -0.026 | 0.018 | -0.062 | 0.010 | -1.41 | 1.60E-01 |
|  | <i>TMPRSS6</i> | rs2543513 | G | HET      | 1812 | -0.010 | 0.013 | -0.036 | 0.016 | -0.79 | 4.29E-01 |
|  | <i>TMPRSS6</i> | rs2543513 | G | GENO_2DF | 1812 | NA     | NA    | NA     | NA    | 2.02  | 3.64E-01 |
|  | <i>TMPRSS6</i> | rs2413451 | G | HOM      | 1812 | -0.026 | 0.018 | -0.062 | 0.010 | -1.41 | 1.60E-01 |
|  | <i>TMPRSS6</i> | rs2413451 | G | HET      | 1812 | -0.010 | 0.013 | -0.036 | 0.016 | -0.79 | 4.29E-01 |
|  | <i>TMPRSS6</i> | rs2413451 | G | GENO_2DF | 1812 | NA     | NA    | NA     | NA    | 2.02  | 3.64E-01 |
|  | <i>TMPRSS6</i> | rs2251655 | T | HOM      | 1812 | -0.026 | 0.018 | -0.062 | 0.010 | -1.41 | 1.60E-01 |
|  | <i>TMPRSS6</i> | rs2251655 | T | HET      | 1812 | -0.010 | 0.013 | -0.036 | 0.016 | -0.79 | 4.29E-01 |
|  | <i>TMPRSS6</i> | rs2251655 | T | GENO_2DF | 1812 | NA     | NA    | NA     | NA    | 2.02  | 3.64E-01 |



|  |         |           |   |          |      |        |       |        |       |       |          |
|--|---------|-----------|---|----------|------|--------|-------|--------|-------|-------|----------|
|  | TMPRSS6 | rs2743824 | C | HOM      | 1810 | -0.026 | 0.018 | -0.062 | 0.010 | -1.41 | 1.59E-01 |
|  | TMPRSS6 | rs2743824 | C | HET      | 1810 | -0.010 | 0.013 | -0.036 | 0.016 | -0.75 | 4.51E-01 |
|  | TMPRSS6 | rs2743824 | C | GENO_2DF | 1810 | NA     | NA    | NA     | NA    | 2.02  | 3.65E-01 |
|  | TMPRSS6 | rs2543509 | G | HOM      | 1810 | -0.026 | 0.018 | -0.062 | 0.010 | -1.41 | 1.59E-01 |
|  | TMPRSS6 | rs2543509 | G | HET      | 1810 | -0.010 | 0.013 | -0.036 | 0.016 | -0.75 | 4.51E-01 |
|  | TMPRSS6 | rs2543509 | G | GENO_2DF | 1810 | NA     | NA    | NA     | NA    | 2.02  | 3.65E-01 |
|  | TMPRSS6 | rs2743825 | G | HOM      | 1809 | -0.026 | 0.018 | -0.062 | 0.010 | -1.41 | 1.58E-01 |
|  | TMPRSS6 | rs2743825 | G | HET      | 1809 | -0.010 | 0.013 | -0.036 | 0.016 | -0.74 | 4.61E-01 |
|  | TMPRSS6 | rs2743825 | G | GENO_2DF | 1809 | NA     | NA    | NA     | NA    | 2.02  | 3.65E-01 |
|  | TMPRSS6 | rs2160906 | A | HOM      | 1821 | 0.029  | 0.026 | -0.022 | 0.079 | 1.12  | 2.64E-01 |
|  | TMPRSS6 | rs2160906 | A | HET      | 1821 | 0.000  | 0.013 | -0.025 | 0.025 | 0.00  | 1.00E+00 |
|  | TMPRSS6 | rs2160906 | A | GENO_2DF | 1821 | NA     | NA    | NA     | NA    | 1.29  | 5.24E-01 |
|  | TMPRSS6 | rs732755  | C | HOM      | 1745 | 0.026  | 0.026 | -0.025 | 0.076 | 1.00  | 3.18E-01 |
|  | TMPRSS6 | rs732755  | C | HET      | 1745 | -0.005 | 0.013 | -0.030 | 0.020 | -0.39 | 6.99E-01 |
|  | TMPRSS6 | rs732755  | C | GENO_2DF | 1745 | NA     | NA    | NA     | NA    | 1.35  | 5.09E-01 |
|  | TMPRSS6 | rs8139988 | C | HOM      | 1798 | 0.029  | 0.026 | -0.022 | 0.080 | 1.12  | 2.61E-01 |
|  | TMPRSS6 | rs8139988 | C | HET      | 1798 | -0.001 | 0.013 | -0.026 | 0.024 | -0.09 | 9.29E-01 |
|  | TMPRSS6 | rs8139988 | C | GENO_2DF | 1798 | NA     | NA    | NA     | NA    | 1.36  | 5.07E-01 |
|  | TMPRSS6 | rs2017764 | A | HOM      | 1789 | -0.028 | 0.019 | -0.065 | 0.010 | -1.46 | 1.45E-01 |
|  | TMPRSS6 | rs2017764 | A | HET      | 1789 | -0.006 | 0.013 | -0.031 | 0.020 | -0.45 | 6.55E-01 |
|  | TMPRSS6 | rs2017764 | A | GENO_2DF | 1789 | NA     | NA    | NA     | NA    | 2.14  | 3.44E-01 |
|  | TMPRSS6 | rs733655  | C | HOM      | 1791 | 0.022  | 0.024 | -0.026 | 0.069 | 0.89  | 3.71E-01 |
|  | TMPRSS6 | rs733655  | C | HET      | 1791 | -0.005 | 0.013 | -0.030 | 0.020 | -0.38 | 7.01E-01 |
|  | TMPRSS6 | rs733655  | C | GENO_2DF | 1791 | NA     | NA    | NA     | NA    | 1.15  | 5.64E-01 |
|  | TMPRSS6 | rs2281090 | A | HOM      | 1793 | 0.024  | 0.026 | -0.028 | 0.075 | 0.90  | 3.68E-01 |
|  | TMPRSS6 | rs2281090 | A | HET      | 1793 | -0.001 | 0.013 | -0.026 | 0.024 | -0.09 | 9.32E-01 |
|  | TMPRSS6 | rs2281090 | A | GENO_2DF | 1793 | NA     | NA    | NA     | NA    | 0.88  | 6.45E-01 |
|  | TMPRSS6 | rs2281091 | T | HOM      | 1791 | 0.022  | 0.026 | -0.029 | 0.074 | 0.84  | 4.00E-01 |
|  | TMPRSS6 | rs2281091 | T | HET      | 1791 | -0.001 | 0.013 | -0.026 | 0.024 | -0.10 | 9.20E-01 |
|  | TMPRSS6 | rs2281091 | T | GENO_2DF | 1791 | NA     | NA    | NA     | NA    | 0.78  | 6.78E-01 |
|  | TMPRSS6 | rs228906  | A | HOM      | 1822 | 0.017  | 0.019 | -0.020 | 0.054 | 0.89  | 3.72E-01 |
|  | TMPRSS6 | rs228906  | A | HET      | 1822 | 0.008  | 0.013 | -0.017 | 0.033 | 0.62  | 5.38E-01 |
|  | TMPRSS6 | rs228906  | A | GENO_2DF | 1822 | NA     | NA    | NA     | NA    | 0.90  | 6.38E-01 |

|  |                |            |   |          |      |        |       |        |        |       |          |
|--|----------------|------------|---|----------|------|--------|-------|--------|--------|-------|----------|
|  | <i>TMPRSS6</i> | rs7289616  | A | HOM      | 1767 | -0.033 | 0.019 | -0.071 | 0.005  | -1.72 | 8.60E-02 |
|  | <i>TMPRSS6</i> | rs7289616  | A | HET      | 1767 | -0.005 | 0.013 | -0.030 | 0.021  | -0.37 | 7.14E-01 |
|  | <i>TMPRSS6</i> | rs7289616  | A | GENO_2DF | 1767 | NA     | NA    | NA     | NA     | 3.04  | 2.18E-01 |
|  | <i>TMPRSS6</i> | rs9619658  | T | HOM      | 1459 | -0.063 | 0.023 | -0.109 | -0.017 | -2.68 | 7.45E-03 |
|  | <i>TMPRSS6</i> | rs9619658  | T | HET      | 1459 | -0.014 | 0.014 | -0.041 | 0.014  | -0.95 | 3.41E-01 |
|  | <i>TMPRSS6</i> | rs9619658  | T | GENO_2DF | 1459 | NA     | NA    | NA     | NA     | 7.20  | 2.73E-02 |
|  | <i>TMPRSS6</i> | rs228907   | A | HOM      | 1819 | 0.027  | 0.023 | -0.017 | 0.071  | 1.20  | 2.31E-01 |
|  | <i>TMPRSS6</i> | rs228907   | A | HET      | 1819 | 0.018  | 0.013 | -0.007 | 0.043  | 1.41  | 1.58E-01 |
|  | <i>TMPRSS6</i> | rs228907   | A | GENO_2DF | 1819 | NA     | NA    | NA     | NA     | 2.79  | 2.48E-01 |
|  | <i>TMPRSS6</i> | rs17750152 | T | HOM      | 1079 | -0.029 | 0.037 | -0.102 | 0.044  | -0.78 | 4.34E-01 |
|  | <i>TMPRSS6</i> | rs17750152 | T | HET      | 1079 | -0.030 | 0.017 | -0.063 | 0.003  | -1.78 | 7.58E-02 |
|  | <i>TMPRSS6</i> | rs17750152 | T | GENO_2DF | 1079 | NA     | NA    | NA     | NA     | 3.42  | 1.81E-01 |
|  | <i>TMPRSS6</i> | rs4140590  | A | HOM      | 1586 | -0.009 | 0.019 | -0.046 | 0.028  | -0.48 | 6.32E-01 |
|  | <i>TMPRSS6</i> | rs4140590  | A | HET      | 1586 | -0.003 | 0.015 | -0.032 | 0.026  | -0.19 | 8.46E-01 |
|  | <i>TMPRSS6</i> | rs4140590  | A | GENO_2DF | 1586 | NA     | NA    | NA     | NA     | 0.23  | 8.91E-01 |
|  | <i>TMPRSS6</i> | rs4140589  | A | HOM      | 1619 | -0.007 | 0.019 | -0.044 | 0.029  | -0.40 | 6.93E-01 |
|  | <i>TMPRSS6</i> | rs4140589  | A | HET      | 1619 | -0.003 | 0.015 | -0.031 | 0.026  | -0.19 | 8.53E-01 |
|  | <i>TMPRSS6</i> | rs4140589  | A | GENO_2DF | 1619 | NA     | NA    | NA     | NA     | 0.16  | 9.25E-01 |
|  | <i>TMPRSS6</i> | rs5995380  | T | HOM      | 1699 | -0.008 | 0.034 | -0.076 | 0.059  | -0.23 | 8.15E-01 |
|  | <i>TMPRSS6</i> | rs5995380  | T | HET      | 1699 | -0.010 | 0.014 | -0.037 | 0.017  | -0.73 | 4.69E-01 |
|  | <i>TMPRSS6</i> | rs5995380  | T | GENO_2DF | 1699 | NA     | NA    | NA     | NA     | 0.55  | 7.61E-01 |
|  | <i>TMPRSS6</i> | rs11704654 | T | HOM      | 1741 | 0.008  | 0.033 | -0.056 | 0.073  | 0.25  | 8.00E-01 |
|  | <i>TMPRSS6</i> | rs11704654 | T | HET      | 1741 | -0.006 | 0.013 | -0.033 | 0.020  | -0.47 | 6.36E-01 |
|  | <i>TMPRSS6</i> | rs11704654 | T | GENO_2DF | 1741 | NA     | NA    | NA     | NA     | 0.32  | 8.50E-01 |
|  | <i>TMPRSS6</i> | rs5756515  | G | HOM      | 1701 | -0.004 | 0.018 | -0.040 | 0.032  | -0.21 | 8.34E-01 |
|  | <i>TMPRSS6</i> | rs5756515  | G | HET      | 1701 | -0.001 | 0.014 | -0.029 | 0.027  | -0.07 | 9.44E-01 |
|  | <i>TMPRSS6</i> | rs5756515  | G | GENO_2DF | 1701 | NA     | NA    | NA     | NA     | 0.04  | 9.78E-01 |
|  | <i>TMPRSS6</i> | rs5756516  | T | HOM      | 1701 | -0.004 | 0.018 | -0.040 | 0.032  | -0.21 | 8.34E-01 |
|  | <i>TMPRSS6</i> | rs5756516  | T | HET      | 1701 | -0.001 | 0.014 | -0.029 | 0.027  | -0.07 | 9.44E-01 |
|  | <i>TMPRSS6</i> | rs5756516  | T | GENO_2DF | 1701 | NA     | NA    | NA     | NA     | 0.04  | 9.78E-01 |
|  | <i>TMPRSS6</i> | rs228909   | G | HOM      | 1821 | 0.019  | 0.030 | -0.039 | 0.077  | 0.64  | 5.20E-01 |
|  | <i>TMPRSS6</i> | rs228909   | G | HET      | 1821 | -0.003 | 0.013 | -0.029 | 0.023  | -0.23 | 8.15E-01 |
|  | <i>TMPRSS6</i> | rs228909   | G | GENO_2DF | 1821 | NA     | NA    | NA     | NA     | 0.52  | 7.70E-01 |

|  |                |           |   |          |      |        |       |        |       |       |          |
|--|----------------|-----------|---|----------|------|--------|-------|--------|-------|-------|----------|
|  | <i>TMPRSS6</i> | rs228910  | A | HOM      | 1821 | 0.006  | 0.018 | -0.030 | 0.042 | 0.33  | 7.45E-01 |
|  | <i>TMPRSS6</i> | rs228910  | A | HET      | 1821 | -0.012 | 0.013 | -0.038 | 0.013 | -0.94 | 3.46E-01 |
|  | <i>TMPRSS6</i> | rs228910  | A | GENO_2DF | 1821 | NA     | NA    | NA     | NA    | 1.45  | 4.85E-01 |
|  | <i>TMPRSS6</i> | rs2235329 | C | HOM      | 1702 | 0.005  | 0.018 | -0.030 | 0.041 | 0.29  | 7.69E-01 |
|  | <i>TMPRSS6</i> | rs2235329 | C | HET      | 1702 | 0.001  | 0.014 | -0.027 | 0.028 | 0.05  | 9.59E-01 |
|  | <i>TMPRSS6</i> | rs2235329 | C | GENO_2DF | 1702 | NA     | NA    | NA     | NA    | 0.09  | 9.54E-01 |
|  | <i>TMPRSS6</i> | rs228913  | C | HOM      | 1821 | 0.055  | 0.033 | -0.009 | 0.120 | 1.69  | 9.10E-02 |
|  | <i>TMPRSS6</i> | rs228913  | C | HET      | 1821 | -0.014 | 0.013 | -0.039 | 0.012 | -1.04 | 2.97E-01 |
|  | <i>TMPRSS6</i> | rs228913  | C | GENO_2DF | 1821 | NA     | NA    | NA     | NA    | 4.46  | 1.08E-01 |
|  | <i>TMPRSS6</i> | rs228916  | C | HOM      | 1808 | 0.025  | 0.055 | -0.082 | 0.133 | 0.46  | 6.47E-01 |
|  | <i>TMPRSS6</i> | rs228916  | C | HET      | 1808 | -0.020 | 0.015 | -0.049 | 0.009 | -1.37 | 1.70E-01 |
|  | <i>TMPRSS6</i> | rs228916  | C | GENO_2DF | 1808 | NA     | NA    | NA     | NA    | 2.17  | 3.38E-01 |
|  | <i>TMPRSS6</i> | rs228918  | C | HOM      | 1820 | 0.008  | 0.017 | -0.026 | 0.042 | 0.49  | 6.27E-01 |
|  | <i>TMPRSS6</i> | rs228918  | C | HET      | 1820 | 0.012  | 0.013 | -0.014 | 0.039 | 0.93  | 3.51E-01 |
|  | <i>TMPRSS6</i> | rs228918  | C | GENO_2DF | 1820 | NA     | NA    | NA     | NA    | 0.88  | 6.45E-01 |
|  | <i>TMPRSS6</i> | rs228919  | T | HOM      | 1820 | 0.008  | 0.017 | -0.026 | 0.043 | 0.49  | 6.25E-01 |
|  | <i>TMPRSS6</i> | rs228919  | T | HET      | 1820 | 0.012  | 0.013 | -0.014 | 0.039 | 0.93  | 3.53E-01 |
|  | <i>TMPRSS6</i> | rs228919  | T | GENO_2DF | 1820 | NA     | NA    | NA     | NA    | 0.87  | 6.47E-01 |
|  | <i>TMPRSS6</i> | rs2092169 | T | HOM      | 1140 | 0.143  | 0.107 | -0.066 | 0.352 | 1.34  | 1.80E-01 |
|  | <i>TMPRSS6</i> | rs2092169 | T | HET      | 1140 | 0.026  | 0.022 | -0.017 | 0.068 | 1.18  | 2.37E-01 |
|  | <i>TMPRSS6</i> | rs2092169 | T | GENO_2DF | 1140 | NA     | NA    | NA     | NA    | 3.11  | 2.12E-01 |
|  | <i>TMPRSS6</i> | rs228921  | G | HOM      | 1819 | 0.008  | 0.017 | -0.026 | 0.043 | 0.49  | 6.25E-01 |
|  | <i>TMPRSS6</i> | rs228921  | G | HET      | 1819 | 0.012  | 0.013 | -0.014 | 0.039 | 0.93  | 3.54E-01 |
|  | <i>TMPRSS6</i> | rs228921  | G | GENO_2DF | 1819 | NA     | NA    | NA     | NA    | 0.87  | 6.48E-01 |
|  | <i>TMPRSS6</i> | rs3076475 | T | HOM      | 1078 | -0.036 | 0.038 | -0.111 | 0.039 | -0.93 | 3.51E-01 |
|  | <i>TMPRSS6</i> | rs3076475 | T | HET      | 1078 | -0.017 | 0.017 | -0.050 | 0.017 | -0.98 | 3.29E-01 |
|  | <i>TMPRSS6</i> | rs3076475 | T | GENO_2DF | 1078 | NA     | NA    | NA     | NA    | 1.57  | 4.55E-01 |
|  | <i>TMPRSS6</i> | rs228924  | A | HOM      | 1821 | 0.025  | 0.055 | -0.082 | 0.133 | 0.46  | 6.46E-01 |
|  | <i>TMPRSS6</i> | rs228924  | A | HET      | 1821 | -0.017 | 0.015 | -0.045 | 0.012 | -1.15 | 2.51E-01 |
|  | <i>TMPRSS6</i> | rs228924  | A | GENO_2DF | 1821 | NA     | NA    | NA     | NA    | 1.60  | 4.51E-01 |
|  | <i>TMPRSS6</i> | rs228925  | A | HOM      | 1139 | 0.041  | 0.035 | -0.027 | 0.109 | 1.18  | 2.38E-01 |
|  | <i>TMPRSS6</i> | rs228925  | A | HET      | 1139 | -0.005 | 0.016 | -0.037 | 0.027 | -0.31 | 7.56E-01 |
|  | <i>TMPRSS6</i> | rs228925  | A | GENO_2DF | 1139 | NA     | NA    | NA     | NA    | 1.67  | 4.34E-01 |

|                  |                |            |   |          |      |        |       |        |        |       |          |
|------------------|----------------|------------|---|----------|------|--------|-------|--------|--------|-------|----------|
|                  | <i>TMPRSS6</i> | rs5756520  | A | HOM      | 1817 | 0.009  | 0.017 | -0.026 | 0.043  | 0.49  | 6.24E-01 |
|                  | <i>TMPRSS6</i> | rs5756520  | A | HET      | 1817 | 0.013  | 0.013 | -0.013 | 0.039  | 0.95  | 3.40E-01 |
|                  | <i>TMPRSS6</i> | rs5756520  | A | GENO_2DF | 1817 | NA     | NA    | NA     | NA     | 0.92  | 6.32E-01 |
|                  | <i>TMPRSS6</i> | rs11914132 | T | HOM      | 1822 | 0.025  | 0.025 | -0.024 | 0.074  | 1.01  | 3.11E-01 |
|                  | <i>TMPRSS6</i> | rs11914132 | T | HET      | 1822 | -0.002 | 0.013 | -0.027 | 0.024  | -0.12 | 9.02E-01 |
|                  | <i>TMPRSS6</i> | rs11914132 | T | GENO_2DF | 1822 | NA     | NA    | NA     | NA     | 1.13  | 5.69E-01 |
|                  | <i>TMPRSS6</i> | rs738297   | C | HOM      | 1810 | 0.057  | 0.033 | -0.009 | 0.122  | 1.69  | 9.18E-02 |
|                  | <i>TMPRSS6</i> | rs738297   | C | HET      | 1810 | -0.016 | 0.013 | -0.043 | 0.010  | -1.23 | 2.18E-01 |
|                  | <i>TMPRSS6</i> | rs738297   | C | GENO_2DF | 1810 | NA     | NA    | NA     | NA     | 4.92  | 8.55E-02 |
|                  | <i>TMPRSS6</i> | rs11089823 | C | HOM      | 1813 | 0.030  | 0.025 | -0.019 | 0.079  | 1.22  | 2.25E-01 |
|                  | <i>TMPRSS6</i> | rs11089823 | C | HET      | 1813 | -0.001 | 0.013 | -0.026 | 0.024  | -0.09 | 9.25E-01 |
|                  | <i>TMPRSS6</i> | rs11089823 | C | GENO_2DF | 1813 | NA     | NA    | NA     | NA     | 1.58  | 4.53E-01 |
|                  | <i>TMPRSS6</i> | rs11089824 | C | HOM      | 1813 | 0.030  | 0.025 | -0.019 | 0.079  | 1.22  | 2.25E-01 |
|                  | <i>TMPRSS6</i> | rs11089824 | C | HET      | 1813 | -0.001 | 0.013 | -0.026 | 0.024  | -0.09 | 9.25E-01 |
|                  | <i>TMPRSS6</i> | rs11089824 | C | GENO_2DF | 1813 | NA     | NA    | NA     | NA     | 1.58  | 4.53E-01 |
| log(hepcidin/TS) | <i>HFE</i>     | rs9295687  | C | HOM      | 1745 | -0.097 | 0.028 | -0.152 | -0.043 | -3.53 | 4.26E-04 |
|                  | <i>HFE</i>     | rs9295687  | C | HET      | 1745 | -0.047 | 0.021 | -0.088 | -0.007 | -2.29 | 2.19E-02 |
|                  | <i>HFE</i>     | rs9295687  | C | GENO_2DF | 1745 | NA     | NA    | NA     | NA     | 13.27 | 1.32E-03 |
|                  | <i>HFE</i>     | rs4529296  | G | HOM      | 1745 | -0.097 | 0.028 | -0.152 | -0.043 | -3.53 | 4.26E-04 |
|                  | <i>HFE</i>     | rs4529296  | G | HET      | 1745 | -0.047 | 0.021 | -0.088 | -0.007 | -2.29 | 2.19E-02 |
|                  | <i>HFE</i>     | rs4529296  | G | GENO_2DF | 1745 | NA     | NA    | NA     | NA     | 13.27 | 1.32E-03 |
|                  | <i>HFE</i>     | rs9379825  | A | HOM      | 1745 | -0.097 | 0.028 | -0.152 | -0.043 | -3.53 | 4.26E-04 |
|                  | <i>HFE</i>     | rs9379825  | A | HET      | 1745 | -0.047 | 0.021 | -0.088 | -0.007 | -2.29 | 2.19E-02 |
|                  | <i>HFE</i>     | rs9379825  | A | GENO_2DF | 1745 | NA     | NA    | NA     | NA     | 13.27 | 1.32E-03 |
|                  | <i>HFE</i>     | rs9467672  | T | HOM      | 1745 | -0.097 | 0.028 | -0.152 | -0.043 | -3.53 | 4.26E-04 |
|                  | <i>HFE</i>     | rs9467672  | T | HET      | 1745 | -0.047 | 0.021 | -0.088 | -0.007 | -2.29 | 2.19E-02 |
|                  | <i>HFE</i>     | rs9467672  | T | GENO_2DF | 1745 | NA     | NA    | NA     | NA     | 13.27 | 1.32E-03 |
|                  | <i>HFE</i>     | rs9295688  | A | HOM      | 1744 | -0.098 | 0.028 | -0.152 | -0.043 | -3.53 | 4.29E-04 |
|                  | <i>HFE</i>     | rs9295688  | A | HET      | 1744 | -0.047 | 0.021 | -0.088 | -0.007 | -2.29 | 2.19E-02 |
|                  | <i>HFE</i>     | rs9295688  | A | GENO_2DF | 1744 | NA     | NA    | NA     | NA     | 13.26 | 1.32E-03 |
|                  | <i>HFE</i>     | rs2006736  | T | HOM      | 1744 | -0.098 | 0.028 | -0.152 | -0.043 | -3.53 | 4.29E-04 |
|                  | <i>HFE</i>     | rs2006736  | T | HET      | 1744 | -0.047 | 0.021 | -0.088 | -0.007 | -2.29 | 2.19E-02 |
|                  | <i>HFE</i>     | rs2006736  | T | GENO_2DF | 1744 | NA     | NA    | NA     | NA     | 13.26 | 1.32E-03 |

|  |     |           |   |          |      |        |       |        |        |       |          |
|--|-----|-----------|---|----------|------|--------|-------|--------|--------|-------|----------|
|  | HFE | rs1800702 | G | HOM      | 1744 | -0.098 | 0.028 | -0.152 | -0.043 | -3.53 | 4.29E-04 |
|  | HFE | rs1800702 | G | HET      | 1744 | -0.047 | 0.021 | -0.088 | -0.007 | -2.29 | 2.19E-02 |
|  | HFE | rs1800702 | G | GENO_2DF | 1744 | NA     | NA    | NA     | NA     | 13.26 | 1.32E-03 |
|  | HFE | rs2794720 | C | HOM      | 1744 | -0.098 | 0.028 | -0.152 | -0.043 | -3.53 | 4.29E-04 |
|  | HFE | rs2794720 | C | HET      | 1744 | -0.047 | 0.021 | -0.088 | -0.007 | -2.29 | 2.19E-02 |
|  | HFE | rs2794720 | C | GENO_2DF | 1744 | NA     | NA    | NA     | NA     | 13.26 | 1.32E-03 |
|  | HFE | rs2794719 | G | HOM      | 1744 | -0.098 | 0.028 | -0.152 | -0.043 | -3.53 | 4.29E-04 |
|  | HFE | rs2794719 | G | HET      | 1744 | -0.047 | 0.021 | -0.088 | -0.007 | -2.29 | 2.19E-02 |
|  | HFE | rs2794719 | G | GENO_2DF | 1744 | NA     | NA    | NA     | NA     | 13.26 | 1.32E-03 |
|  | HFE | rs9366637 | T | HOM      | 1804 | 0.167  | 0.149 | -0.124 | 0.458  | 1.12  | 2.61E-01 |
|  | HFE | rs9366637 | T | HET      | 1804 | -0.049 | 0.030 | -0.108 | 0.010  | -1.61 | 1.07E-01 |
|  | HFE | rs9366637 | T | GENO_2DF | 1804 | NA     | NA    | NA     | NA     | 3.95  | 1.39E-01 |
|  | HFE | rs1799945 | G | HOM      | 1755 | -0.055 | 0.055 | -0.163 | 0.052  | -1.01 | 3.12E-01 |
|  | HFE | rs1799945 | G | HET      | 1755 | -0.049 | 0.022 | -0.092 | -0.005 | -2.18 | 2.92E-02 |
|  | HFE | rs1799945 | G | GENO_2DF | 1755 | NA     | NA    | NA     | NA     | 5.40  | 6.71E-02 |
|  | HFE | rs2071303 | C | HOM      | 1804 | 0.004  | 0.030 | -0.055 | 0.062  | 0.12  | 9.03E-01 |
|  | HFE | rs2071303 | C | HET      | 1804 | -0.013 | 0.020 | -0.051 | 0.026  | -0.63 | 5.26E-01 |
|  | HFE | rs2071303 | C | GENO_2DF | 1804 | NA     | NA    | NA     | NA     | 0.53  | 7.67E-01 |
|  | HFE | rs1800562 | A | HOM      | 1804 | -0.580 | 0.196 | -0.963 | -0.196 | -2.96 | 3.11E-03 |
|  | HFE | rs1800562 | A | HET      | 1804 | -0.072 | 0.029 | -0.129 | -0.016 | -2.53 | 1.16E-02 |
|  | HFE | rs1800562 | A | GENO_2DF | 1804 | NA     | NA    | NA     | NA     | 14.93 | 5.73E-04 |
|  | HFE | rs1800708 | C | HOM      | 1803 | 0.134  | 0.161 | -0.181 | 0.448  | 0.83  | 4.06E-01 |
|  | HFE | rs1800708 | C | HET      | 1803 | -0.031 | 0.030 | -0.089 | 0.027  | -1.05 | 2.93E-01 |
|  | HFE | rs1800708 | C | GENO_2DF | 1803 | NA     | NA    | NA     | NA     | 1.84  | 3.99E-01 |
|  | HFE | rs2858996 | T | HOM      | 1803 | -0.057 | 0.050 | -0.155 | 0.041  | -1.14 | 2.54E-01 |
|  | HFE | rs2858996 | T | HET      | 1803 | -0.027 | 0.020 | -0.065 | 0.012  | -1.35 | 1.76E-01 |
|  | HFE | rs2858996 | T | GENO_2DF | 1803 | NA     | NA    | NA     | NA     | 2.76  | 2.52E-01 |
|  | HFE | rs1572982 | A | HOM      | 1804 | -0.019 | 0.027 | -0.071 | 0.033  | -0.73 | 4.66E-01 |
|  | HFE | rs1572982 | A | HET      | 1804 | -0.022 | 0.022 | -0.064 | 0.020  | -1.03 | 3.02E-01 |
|  | HFE | rs1572982 | A | GENO_2DF | 1804 | NA     | NA    | NA     | NA     | 1.12  | 5.71E-01 |
|  | HFE | rs707889  | A | HOM      | 1804 | -0.057 | 0.050 | -0.155 | 0.041  | -1.14 | 2.54E-01 |
|  | HFE | rs707889  | A | HET      | 1804 | -0.027 | 0.020 | -0.065 | 0.012  | -1.35 | 1.77E-01 |
|  | HFE | rs707889  | A | GENO_2DF | 1804 | NA     | NA    | NA     | NA     | 2.75  | 2.53E-01 |

|  |     |            |   |          |      |        |       |        |        |       |          |
|--|-----|------------|---|----------|------|--------|-------|--------|--------|-------|----------|
|  | HFE | rs1045537  | C | HOM      | 1753 | 0.001  | 0.070 | -0.136 | 0.139  | 0.02  | 9.84E-01 |
|  | HFE | rs1045537  | C | HET      | 1753 | 0.077  | 0.023 | 0.032  | 0.121  | 3.38  | 7.30E-04 |
|  | HFE | rs1045537  | C | GENO_2DF | 1753 | NA     | NA    | NA     | NA     | 11.50 | 3.18E-03 |
|  | HFE | rs12346    | T | HOM      | 1804 | 0.059  | 0.031 | -0.003 | 0.120  | 1.87  | 6.22E-02 |
|  | HFE | rs12346    | T | HET      | 1804 | 0.037  | 0.020 | -0.002 | 0.075  | 1.87  | 6.15E-02 |
|  | HFE | rs12346    | T | GENO_2DF | 1804 | NA     | NA    | NA     | NA     | 5.29  | 7.09E-02 |
|  | HFE | rs17596719 | A | HOM      | 1802 | -0.008 | 0.088 | -0.181 | 0.165  | -0.09 | 9.28E-01 |
|  | HFE | rs17596719 | A | HET      | 1802 | -0.027 | 0.023 | -0.073 | 0.019  | -1.16 | 2.46E-01 |
|  | HFE | rs17596719 | A | GENO_2DF | 1802 | NA     | NA    | NA     | NA     | 1.35  | 5.10E-01 |
|  | HFE | rs6918586  | C | HOM      | 1801 | -0.013 | 0.028 | -0.068 | 0.041  | -0.48 | 6.28E-01 |
|  | HFE | rs6918586  | C | HET      | 1801 | -0.015 | 0.020 | -0.055 | 0.025  | -0.73 | 4.69E-01 |
|  | HFE | rs6918586  | C | GENO_2DF | 1801 | NA     | NA    | NA     | NA     | 0.56  | 7.54E-01 |
|  | HFE | rs9393685  | C | HOM      | 1797 | 0.135  | 0.161 | -0.180 | 0.450  | 0.84  | 4.01E-01 |
|  | HFE | rs9393685  | C | HET      | 1797 | -0.027 | 0.029 | -0.083 | 0.030  | -0.92 | 3.56E-01 |
|  | HFE | rs9393685  | C | GENO_2DF | 1797 | NA     | NA    | NA     | NA     | 1.59  | 4.51E-01 |
|  | HFE | rs1150659  | A | HOM      | 1802 | -0.048 | 0.050 | -0.146 | 0.049  | -0.97 | 3.30E-01 |
|  | HFE | rs1150659  | A | HET      | 1802 | -0.028 | 0.020 | -0.067 | 0.011  | -1.41 | 1.59E-01 |
|  | HFE | rs1150659  | A | GENO_2DF | 1802 | NA     | NA    | NA     | NA     | 2.61  | 2.72E-01 |
|  | HFE | rs1150660  | A | HOM      | 1804 | 0.059  | 0.031 | -0.003 | 0.120  | 1.87  | 6.22E-02 |
|  | HFE | rs1150660  | A | HET      | 1804 | 0.037  | 0.020 | -0.002 | 0.075  | 1.87  | 6.15E-02 |
|  | HFE | rs1150660  | A | GENO_2DF | 1804 | NA     | NA    | NA     | NA     | 5.29  | 7.09E-02 |
|  | HFE | rs198857   | G | HOM      | 1802 | -0.020 | 0.027 | -0.072 | 0.032  | -0.75 | 4.54E-01 |
|  | HFE | rs198857   | G | HET      | 1802 | -0.023 | 0.022 | -0.066 | 0.019  | -1.08 | 2.79E-01 |
|  | HFE | rs198857   | G | GENO_2DF | 1802 | NA     | NA    | NA     | NA     | 1.22  | 5.42E-01 |
|  | HFE | rs198856   | G | HOM      | 1802 | -0.020 | 0.027 | -0.072 | 0.032  | -0.75 | 4.54E-01 |
|  | HFE | rs198856   | G | HET      | 1802 | -0.023 | 0.022 | -0.066 | 0.019  | -1.08 | 2.79E-01 |
|  | HFE | rs198856   | G | GENO_2DF | 1802 | NA     | NA    | NA     | NA     | 1.22  | 5.42E-01 |
|  | HFE | rs1543680  | A | HOM      | 1798 | -0.056 | 0.050 | -0.154 | 0.042  | -1.11 | 2.66E-01 |
|  | HFE | rs1543680  | A | HET      | 1798 | -0.028 | 0.020 | -0.067 | 0.011  | -1.40 | 1.61E-01 |
|  | HFE | rs1543680  | A | GENO_2DF | 1798 | NA     | NA    | NA     | NA     | 2.83  | 2.43E-01 |
|  | HFE | rs198855   | A | HOM      | 1755 | -0.061 | 0.037 | -0.133 | 0.011  | -1.66 | 9.75E-02 |
|  | HFE | rs198855   | A | HET      | 1755 | -0.046 | 0.020 | -0.085 | -0.007 | -2.33 | 2.01E-02 |
|  | HFE | rs198855   | A | GENO_2DF | 1755 | NA     | NA    | NA     | NA     | 6.81  | 3.33E-02 |

|  |         |           |   |          |          |        |       |        |        |       |          |
|--|---------|-----------|---|----------|----------|--------|-------|--------|--------|-------|----------|
|  | HFE     | rs7743957 | C | HOM      | 1797     | 0.135  | 0.161 | -0.180 | 0.450  | 0.84  | 4.01E-01 |
|  | HFE     | rs7743957 | C | HET      | 1797     | -0.027 | 0.029 | -0.083 | 0.030  | -0.92 | 3.56E-01 |
|  | HFE     | rs7743957 | C | GENO_2DF | 1797     | NA     | NA    | NA     | NA     | 1.59  | 4.51E-01 |
|  | HFE     | rs198854  | T | HOM      | 1803     | -0.020 | 0.027 | -0.072 | 0.032  | -0.76 | 4.50E-01 |
|  | HFE     | rs198854  | T | HET      | 1803     | -0.023 | 0.022 | -0.066 | 0.019  | -1.08 | 2.79E-01 |
|  | HFE     | rs198854  | T | GENO_2DF | 1803     | NA     | NA    | NA     | NA     | 1.23  | 5.42E-01 |
|  | HFE     | rs198853  | C | HOM      | 1804     | 0.059  | 0.031 | -0.003 | 0.120  | 1.87  | 6.22E-02 |
|  | HFE     | rs198853  | C | HET      | 1804     | 0.037  | 0.020 | -0.002 | 0.075  | 1.87  | 6.15E-02 |
|  | HFE     | rs198853  | C | GENO_2DF | 1804     | NA     | NA    | NA     | NA     | 5.29  | 7.09E-02 |
|  | HFE     | rs2229768 | C | HOM      | 1803     | -0.048 | 0.050 | -0.146 | 0.049  | -0.97 | 3.30E-01 |
|  | HFE     | rs2229768 | C | HET      | 1.80E+03 | -0.028 | 0.020 | -0.067 | 0.011  | -1.41 | 1.59E-01 |
|  | HFE     | rs2229768 | C | GENO_2DF | 1803     | NA     | NA    | NA     | NA     | 2.60  | 2.73E-01 |
|  | HFE     | rs198852  | G | HOM      | 1804     | 0.022  | 0.028 | -0.033 | 0.077  | 0.78  | 4.34E-01 |
|  | HFE     | rs198852  | G | HET      | 1804     | 0.006  | 0.020 | -0.034 | 0.046  | 0.30  | 7.61E-01 |
|  | HFE     | rs198852  | G | GENO_2DF | 1804     | NA     | NA    | NA     | NA     | 0.61  | 7.36E-01 |
|  | HFE     | rs198851  | T | HOM      | 1646     | -0.004 | 0.062 | -0.126 | 0.117  | -0.07 | 9.43E-01 |
|  | HFE     | rs198851  | T | HET      | 1646     | -0.044 | 0.024 | -0.091 | 0.002  | -1.86 | 6.27E-02 |
|  | HFE     | rs198851  | T | GENO_2DF | 1646     | NA     | NA    | NA     | NA     | 3.48  | 1.76E-01 |
|  | HFE     | rs198848  | T | HOM      | 1804     | 0.022  | 0.028 | -0.033 | 0.077  | 0.78  | 4.34E-01 |
|  | HFE     | rs198848  | T | HET      | 1804     | 0.006  | 0.020 | -0.034 | 0.046  | 0.30  | 7.61E-01 |
|  | HFE     | rs198848  | T | GENO_2DF | 1804     | NA     | NA    | NA     | NA     | 0.61  | 7.36E-01 |
|  | TMPRSS6 | rs2235320 | T | HOM      | 1803     | 0.137  | 0.076 | -0.012 | 0.286  | 1.81  | 7.10E-02 |
|  | TMPRSS6 | rs2235320 | T | HET      | 1803     | 0.084  | 0.022 | 0.041  | 0.128  | 3.80  | 1.48E-04 |
|  | TMPRSS6 | rs2235320 | T | GENO_2DF | 1803     | NA     | NA    | NA     | NA     | 16.88 | 2.16E-04 |
|  | TMPRSS6 | rs2235321 | A | HOM      | 1560     | -0.066 | 0.033 | -0.131 | -0.001 | -2.01 | 4.52E-02 |
|  | TMPRSS6 | rs2235321 | A | HET      | 1560     | -0.025 | 0.021 | -0.066 | 0.017  | -1.18 | 2.40E-01 |
|  | TMPRSS6 | rs2235321 | A | GENO_2DF | 1560     | NA     | NA    | NA     | NA     | 4.27  | 1.18E-01 |
|  | TMPRSS6 | rs855791  | A | HOM      | 1804     | 0.121  | 0.027 | 0.069  | 0.174  | 4.53  | 6.16E-06 |
|  | TMPRSS6 | rs855791  | A | HET      | 1804     | 0.051  | 0.021 | 0.009  | 0.093  | 2.38  | 1.76E-02 |
|  | TMPRSS6 | rs855791  | A | GENO_2DF | 1804     | NA     | NA    | NA     | NA     | 20.57 | 3.42E-05 |
|  | TMPRSS6 | rs5756504 | T | HOM      | 1603     | -0.072 | 0.034 | -0.138 | -0.006 | -2.12 | 3.39E-02 |
|  | TMPRSS6 | rs5756504 | T | HET      | 1603     | -0.036 | 0.021 | -0.077 | 0.005  | -1.70 | 8.86E-02 |
|  | TMPRSS6 | rs5756504 | T | GENO_2DF | 1603     | NA     | NA    | NA     | NA     | 5.63  | 6.00E-02 |

|  |                |            |   |          |      |        |       |        |        |       |          |
|--|----------------|------------|---|----------|------|--------|-------|--------|--------|-------|----------|
|  | <i>TMPRSS6</i> | rs5756505  | C | HOM      | 1647 | -0.080 | 0.031 | -0.141 | -0.018 | -2.53 | 1.16E-02 |
|  | <i>TMPRSS6</i> | rs5756505  | C | HET      | 1647 | -0.034 | 0.021 | -0.075 | 0.007  | -1.63 | 1.03E-01 |
|  | <i>TMPRSS6</i> | rs5756505  | C | GENO_2DF | 1647 | NA     | NA    | NA     | NA     | 6.92  | 3.15E-02 |
|  | <i>TMPRSS6</i> | rs5756506  | C | HOM      | 1635 | -0.073 | 0.033 | -0.138 | -0.009 | -2.22 | 2.66E-02 |
|  | <i>TMPRSS6</i> | rs5756506  | C | HET      | 1635 | -0.037 | 0.021 | -0.078 | 0.004  | -1.78 | 7.62E-02 |
|  | <i>TMPRSS6</i> | rs5756506  | C | GENO_2DF | 1635 | NA     | NA    | NA     | NA     | 6.11  | 4.72E-02 |
|  | <i>TMPRSS6</i> | rs4820268  | G | HOM      | 1799 | 0.114  | 0.027 | 0.062  | 0.167  | 4.28  | 2.00E-05 |
|  | <i>TMPRSS6</i> | rs4820268  | G | HET      | 1799 | 0.058  | 0.022 | 0.015  | 0.101  | 2.66  | 8.01E-03 |
|  | <i>TMPRSS6</i> | rs4820268  | G | GENO_2DF | 1799 | NA     | NA    | NA     | NA     | 18.48 | 9.73E-05 |
|  | <i>TMPRSS6</i> | rs13055107 | A | HOM      | 1603 | -0.111 | 0.084 | -0.276 | 0.055  | -1.31 | 1.91E-01 |
|  | <i>TMPRSS6</i> | rs13055107 | A | HET      | 1603 | -0.062 | 0.025 | -0.111 | -0.014 | -2.54 | 1.11E-02 |
|  | <i>TMPRSS6</i> | rs13055107 | A | GENO_2DF | 1603 | NA     | NA    | NA     | NA     | 7.82  | 2.01E-02 |
|  | <i>TMPRSS6</i> | rs2413450  | T | HOM      | 1719 | 0.114  | 0.028 | 0.059  | 0.168  | 4.10  | 4.31E-05 |
|  | <i>TMPRSS6</i> | rs2413450  | T | HET      | 1719 | 0.047  | 0.022 | 0.003  | 0.090  | 2.11  | 3.50E-02 |
|  | <i>TMPRSS6</i> | rs2413450  | T | GENO_2DF | 1719 | NA     | NA    | NA     | NA     | 16.82 | 2.23E-04 |
|  | <i>TMPRSS6</i> | rs855789   | C | HOM      | 1799 | 0.104  | 0.278 | -0.441 | 0.648  | 0.37  | 7.10E-01 |
|  | <i>TMPRSS6</i> | rs855789   | C | HET      | 1799 | -0.039 | 0.032 | -0.101 | 0.023  | -1.23 | 2.18E-01 |
|  | <i>TMPRSS6</i> | rs855789   | C | GENO_2DF | 1799 | NA     | NA    | NA     | NA     | 1.67  | 4.35E-01 |
|  | <i>TMPRSS6</i> | rs855788   | A | HOM      | 1803 | -0.062 | 0.029 | -0.120 | -0.005 | -2.15 | 3.19E-02 |
|  | <i>TMPRSS6</i> | rs855788   | A | HET      | 1803 | -0.029 | 0.020 | -0.068 | 0.011  | -1.43 | 1.53E-01 |
|  | <i>TMPRSS6</i> | rs855788   | A | GENO_2DF | 1803 | NA     | NA    | NA     | NA     | 5.01  | 8.18E-02 |
|  | <i>TMPRSS6</i> | rs17750017 | A | HOM      | 1790 | NA     | NA    | NA     | NA     | NA    | NA       |
|  | <i>TMPRSS6</i> | rs17750017 | A | HET      | 1790 | NA     | NA    | NA     | NA     | NA    | NA       |
|  | <i>TMPRSS6</i> | rs17750017 | A | GENO_2DF | 1790 | NA     | NA    | NA     | NA     | NA    | NA       |
|  | <i>TMPRSS6</i> | rs2743820  | C | HOM      | 1575 | -0.022 | 0.032 | -0.085 | 0.042  | -0.67 | 5.00E-01 |
|  | <i>TMPRSS6</i> | rs2743820  | C | HET      | 1575 | -0.028 | 0.021 | -0.070 | 0.014  | -1.31 | 1.90E-01 |
|  | <i>TMPRSS6</i> | rs2743820  | C | GENO_2DF | 1575 | NA     | NA    | NA     | NA     | 1.77  | 4.13E-01 |
|  | <i>TMPRSS6</i> | rs1005478  | A | HOM      | 1535 | -0.007 | 0.032 | -0.069 | 0.055  | -0.22 | 8.23E-01 |
|  | <i>TMPRSS6</i> | rs1005478  | A | HET      | 1535 | -0.001 | 0.022 | -0.043 | 0.042  | -0.03 | 9.76E-01 |
|  | <i>TMPRSS6</i> | rs1005478  | A | GENO_2DF | 1535 | NA     | NA    | NA     | NA     | 0.05  | 9.74E-01 |
|  | <i>TMPRSS6</i> | rs7286184  | G | HOM      | 1544 | 0.082  | 0.047 | -0.010 | 0.173  | 1.75  | 8.01E-02 |
|  | <i>TMPRSS6</i> | rs7286184  | G | HET      | 1544 | 0.013  | 0.022 | -0.029 | 0.056  | 0.62  | 5.36E-01 |
|  | <i>TMPRSS6</i> | rs7286184  | G | GENO_2DF | 1544 | NA     | NA    | NA     | NA     | 3.18  | 2.04E-01 |



|  |                |           |   |          |      |        |       |        |       |       |          |
|--|----------------|-----------|---|----------|------|--------|-------|--------|-------|-------|----------|
|  | <i>TMPRSS6</i> | rs2246092 | G | HOM      | 1534 | -0.011 | 0.032 | -0.073 | 0.051 | -0.34 | 7.35E-01 |
|  | <i>TMPRSS6</i> | rs2246092 | G | HET      | 1534 | -0.004 | 0.022 | -0.047 | 0.039 | -0.19 | 8.52E-01 |
|  | <i>TMPRSS6</i> | rs2246092 | G | GENO_2DF | 1534 | NA     | NA    | NA     | NA    | 0.12  | 9.42E-01 |
|  | <i>TMPRSS6</i> | rs2543519 | G | HOM      | 1559 | 0.088  | 0.041 | 0.007  | 0.169 | 2.14  | 3.28E-02 |
|  | <i>TMPRSS6</i> | rs2543519 | G | HET      | 1559 | -0.005 | 0.021 | -0.047 | 0.036 | -0.25 | 8.00E-01 |
|  | <i>TMPRSS6</i> | rs2543519 | G | GENO_2DF | 1559 | NA     | NA    | NA     | NA    | 5.05  | 8.00E-02 |
|  | <i>TMPRSS6</i> | rs2111833 | T | HOM      | 1598 | -0.024 | 0.032 | -0.087 | 0.039 | -0.74 | 4.60E-01 |
|  | <i>TMPRSS6</i> | rs2111833 | T | HET      | 1598 | -0.035 | 0.021 | -0.077 | 0.006 | -1.67 | 9.45E-02 |
|  | <i>TMPRSS6</i> | rs2111833 | T | GENO_2DF | 1598 | NA     | NA    | NA     | NA    | 2.82  | 2.44E-01 |
|  | <i>TMPRSS6</i> | rs2179229 | G | HOM      | 1550 | -0.011 | 0.031 | -0.073 | 0.050 | -0.36 | 7.17E-01 |
|  | <i>TMPRSS6</i> | rs2179229 | G | HET      | 1550 | -0.002 | 0.022 | -0.045 | 0.040 | -0.11 | 9.13E-01 |
|  | <i>TMPRSS6</i> | rs2179229 | G | GENO_2DF | 1550 | NA     | NA    | NA     | NA    | 0.13  | 9.36E-01 |
|  | <i>TMPRSS6</i> | rs2235323 | C | HOM      | 1801 | -0.021 | 0.029 | -0.078 | 0.036 | -0.72 | 4.73E-01 |
|  | <i>TMPRSS6</i> | rs2235323 | C | HET      | 1801 | -0.039 | 0.020 | -0.079 | 0.000 | -1.96 | 5.04E-02 |
|  | <i>TMPRSS6</i> | rs2235323 | C | GENO_2DF | 1801 | NA     | NA    | NA     | NA    | 3.84  | 1.47E-01 |
|  | <i>TMPRSS6</i> | rs2235324 | C | HOM      | 1803 | -0.021 | 0.029 | -0.078 | 0.036 | -0.72 | 4.71E-01 |
|  | <i>TMPRSS6</i> | rs2235324 | C | HET      | 1803 | -0.039 | 0.020 | -0.079 | 0.000 | -1.97 | 4.89E-02 |
|  | <i>TMPRSS6</i> | rs2235324 | C | GENO_2DF | 1803 | NA     | NA    | NA     | NA    | 3.89  | 1.43E-01 |
|  | <i>TMPRSS6</i> | rs736852  | C | HOM      | 1790 | -0.037 | 0.028 | -0.092 | 0.018 | -1.32 | 1.88E-01 |
|  | <i>TMPRSS6</i> | rs736852  | C | HET      | 1790 | -0.034 | 0.021 | -0.074 | 0.007 | -1.64 | 1.02E-01 |
|  | <i>TMPRSS6</i> | rs736852  | C | GENO_2DF | 1790 | NA     | NA    | NA     | NA    | 3.15  | 2.07E-01 |
|  | <i>TMPRSS6</i> | rs2019848 | A | HOM      | 1739 | 0.096  | 0.043 | 0.012  | 0.179 | 2.24  | 2.56E-02 |
|  | <i>TMPRSS6</i> | rs2019848 | A | HET      | 1739 | 0.015  | 0.020 | -0.024 | 0.054 | 0.74  | 4.59E-01 |
|  | <i>TMPRSS6</i> | rs2019848 | A | GENO_2DF | 1739 | NA     | NA    | NA     | NA    | 5.13  | 7.71E-02 |
|  | <i>TMPRSS6</i> | rs1421312 | G | HOM      | 1803 | -0.031 | 0.029 | -0.087 | 0.025 | -1.08 | 2.80E-01 |
|  | <i>TMPRSS6</i> | rs1421312 | G | HET      | 1803 | -0.037 | 0.020 | -0.076 | 0.003 | -1.82 | 6.93E-02 |
|  | <i>TMPRSS6</i> | rs1421312 | G | GENO_2DF | 1803 | NA     | NA    | NA     | NA    | 3.46  | 1.77E-01 |
|  | <i>TMPRSS6</i> | rs2543514 | C | HOM      | 1795 | -0.036 | 0.028 | -0.091 | 0.019 | -1.27 | 2.04E-01 |
|  | <i>TMPRSS6</i> | rs2543514 | C | HET      | 1795 | -0.032 | 0.021 | -0.072 | 0.008 | -1.57 | 1.16E-01 |
|  | <i>TMPRSS6</i> | rs2543514 | C | GENO_2DF | 1795 | NA     | NA    | NA     | NA    | 2.91  | 2.33E-01 |
|  | <i>TMPRSS6</i> | rs2543513 | G | HOM      | 1795 | -0.036 | 0.028 | -0.091 | 0.019 | -1.27 | 2.04E-01 |
|  | <i>TMPRSS6</i> | rs2543513 | G | HET      | 1795 | -0.032 | 0.021 | -0.072 | 0.008 | -1.57 | 1.16E-01 |
|  | <i>TMPRSS6</i> | rs2543513 | G | GENO_2DF | 1795 | NA     | NA    | NA     | NA    | 2.91  | 2.33E-01 |

|  |         |           |   |          |      |        |       |        |       |       |          |
|--|---------|-----------|---|----------|------|--------|-------|--------|-------|-------|----------|
|  | TMPRSS6 | rs2413451 | G | HOM      | 1795 | -0.036 | 0.028 | -0.091 | 0.019 | -1.27 | 2.04E-01 |
|  | TMPRSS6 | rs2413451 | G | HET      | 1795 | -0.032 | 0.021 | -0.072 | 0.008 | -1.57 | 1.16E-01 |
|  | TMPRSS6 | rs2413451 | G | GENO_2DF | 1795 | NA     | NA    | NA     | NA    | 2.91  | 2.33E-01 |
|  | TMPRSS6 | rs2251655 | T | HOM      | 1795 | -0.036 | 0.028 | -0.091 | 0.019 | -1.27 | 2.04E-01 |
|  | TMPRSS6 | rs2251655 | T | HET      | 1795 | -0.032 | 0.021 | -0.072 | 0.008 | -1.57 | 1.16E-01 |
|  | TMPRSS6 | rs2251655 | T | GENO_2DF | 1795 | NA     | NA    | NA     | NA    | 2.91  | 2.33E-01 |
|  | TMPRSS6 | rs2743824 | C | HOM      | 1793 | -0.036 | 0.028 | -0.091 | 0.020 | -1.27 | 2.05E-01 |
|  | TMPRSS6 | rs2743824 | C | HET      | 1793 | -0.032 | 0.021 | -0.072 | 0.008 | -1.56 | 1.20E-01 |
|  | TMPRSS6 | rs2743824 | C | GENO_2DF | 1793 | NA     | NA    | NA     | NA    | 2.87  | 2.38E-01 |
|  | TMPRSS6 | rs2543509 | G | HOM      | 1793 | -0.036 | 0.028 | -0.091 | 0.020 | -1.27 | 2.05E-01 |
|  | TMPRSS6 | rs2543509 | G | HET      | 1793 | -0.032 | 0.021 | -0.072 | 0.008 | -1.56 | 1.20E-01 |
|  | TMPRSS6 | rs2543509 | G | GENO_2DF | 1793 | NA     | NA    | NA     | NA    | 2.87  | 2.38E-01 |
|  | TMPRSS6 | rs2743825 | G | HOM      | 1792 | -0.036 | 0.028 | -0.091 | 0.020 | -1.27 | 2.05E-01 |
|  | TMPRSS6 | rs2743825 | G | HET      | 1792 | -0.032 | 0.021 | -0.072 | 0.008 | -1.55 | 1.21E-01 |
|  | TMPRSS6 | rs2743825 | G | GENO_2DF | 1792 | NA     | NA    | NA     | NA    | 2.86  | 2.40E-01 |
|  | TMPRSS6 | rs2160906 | A | HOM      | 1803 | 0.113  | 0.040 | 0.036  | 0.191 | 2.86  | 4.26E-03 |
|  | TMPRSS6 | rs2160906 | A | HET      | 1803 | 0.004  | 0.020 | -0.034 | 0.043 | 0.22  | 8.23E-01 |
|  | TMPRSS6 | rs2160906 | A | GENO_2DF | 1803 | NA     | NA    | NA     | NA    | 8.30  | 1.58E-02 |
|  | TMPRSS6 | rs732755  | C | HOM      | 1727 | 0.110  | 0.040 | 0.033  | 0.188 | 2.79  | 5.32E-03 |
|  | TMPRSS6 | rs732755  | C | HET      | 1727 | -0.003 | 0.020 | -0.042 | 0.036 | -0.14 | 8.86E-01 |
|  | TMPRSS6 | rs732755  | C | GENO_2DF | 1727 | NA     | NA    | NA     | NA    | 8.28  | 1.59E-02 |
|  | TMPRSS6 | rs8139988 | C | HOM      | 1780 | 0.116  | 0.040 | 0.038  | 0.194 | 2.90  | 3.75E-03 |
|  | TMPRSS6 | rs8139988 | C | HET      | 1780 | 0.003  | 0.020 | -0.036 | 0.042 | 0.16  | 8.75E-01 |
|  | TMPRSS6 | rs8139988 | C | GENO_2DF | 1780 | NA     | NA    | NA     | NA    | 8.59  | 1.37E-02 |
|  | TMPRSS6 | rs2017764 | A | HOM      | 1772 | -0.039 | 0.029 | -0.097 | 0.019 | -1.33 | 1.84E-01 |
|  | TMPRSS6 | rs2017764 | A | HET      | 1772 | -0.033 | 0.020 | -0.073 | 0.006 | -1.65 | 9.95E-02 |
|  | TMPRSS6 | rs2017764 | A | GENO_2DF | 1772 | NA     | NA    | NA     | NA    | 3.28  | 1.94E-01 |
|  | TMPRSS6 | rs733655  | C | HOM      | 1774 | 0.105  | 0.037 | 0.032  | 0.177 | 2.82  | 4.93E-03 |
|  | TMPRSS6 | rs733655  | C | HET      | 1774 | -0.007 | 0.020 | -0.046 | 0.032 | -0.35 | 7.29E-01 |
|  | TMPRSS6 | rs733655  | C | GENO_2DF | 1774 | NA     | NA    | NA     | NA    | 8.86  | 1.19E-02 |
|  | TMPRSS6 | rs2281090 | A | HOM      | 1775 | 0.107  | 0.040 | 0.028  | 0.186 | 2.65  | 8.15E-03 |
|  | TMPRSS6 | rs2281090 | A | HET      | 1775 | 0.005  | 0.020 | -0.034 | 0.043 | 0.23  | 8.18E-01 |
|  | TMPRSS6 | rs2281090 | A | GENO_2DF | 1775 | NA     | NA    | NA     | NA    | 7.09  | 2.89E-02 |

|  |                |            |   |          |      |        |       |        |       |       |          |
|--|----------------|------------|---|----------|------|--------|-------|--------|-------|-------|----------|
|  | <i>TMPRSS6</i> | rs2281091  | T | HOM      | 1773 | 0.109  | 0.041 | 0.029  | 0.189 | 2.68  | 7.35E-03 |
|  | <i>TMPRSS6</i> | rs2281091  | T | HET      | 1773 | 0.004  | 0.020 | -0.034 | 0.043 | 0.23  | 8.21E-01 |
|  | <i>TMPRSS6</i> | rs2281091  | T | GENO_2DF | 1773 | NA     | NA    | NA     | NA    | 7.28  | 2.63E-02 |
|  | <i>TMPRSS6</i> | rs228906   | A | HOM      | 1804 | 0.002  | 0.029 | -0.056 | 0.059 | 0.06  | 9.55E-01 |
|  | <i>TMPRSS6</i> | rs228906   | A | HET      | 1804 | -0.009 | 0.020 | -0.048 | 0.030 | -0.43 | 6.67E-01 |
|  | <i>TMPRSS6</i> | rs228906   | A | GENO_2DF | 1804 | NA     | NA    | NA     | NA    | 0.24  | 8.88E-01 |
|  | <i>TMPRSS6</i> | rs7289616  | A | HOM      | 1750 | -0.036 | 0.030 | -0.094 | 0.023 | -1.20 | 2.32E-01 |
|  | <i>TMPRSS6</i> | rs7289616  | A | HET      | 1750 | -0.032 | 0.020 | -0.072 | 0.008 | -1.57 | 1.18E-01 |
|  | <i>TMPRSS6</i> | rs7289616  | A | GENO_2DF | 1750 | NA     | NA    | NA     | NA    | 2.87  | 2.38E-01 |
|  | <i>TMPRSS6</i> | rs9619658  | T | HOM      | 1444 | -0.047 | 0.036 | -0.117 | 0.023 | -1.31 | 1.90E-01 |
|  | <i>TMPRSS6</i> | rs9619658  | T | HET      | 1444 | -0.041 | 0.022 | -0.083 | 0.002 | -1.88 | 6.11E-02 |
|  | <i>TMPRSS6</i> | rs9619658  | T | GENO_2DF | 1444 | NA     | NA    | NA     | NA    | 4.12  | 1.27E-01 |
|  | <i>TMPRSS6</i> | rs228907   | A | HOM      | 1801 | -0.008 | 0.035 | -0.076 | 0.061 | -0.22 | 8.28E-01 |
|  | <i>TMPRSS6</i> | rs228907   | A | HET      | 1801 | 0.006  | 0.020 | -0.033 | 0.044 | 0.30  | 7.67E-01 |
|  | <i>TMPRSS6</i> | rs228907   | A | GENO_2DF | 1801 | NA     | NA    | NA     | NA    | 0.17  | 9.16E-01 |
|  | <i>TMPRSS6</i> | rs17750152 | T | HOM      | 1067 | 0.009  | 0.056 | -0.100 | 0.119 | 0.17  | 8.68E-01 |
|  | <i>TMPRSS6</i> | rs17750152 | T | HET      | 1067 | -0.045 | 0.026 | -0.095 | 0.005 | -1.75 | 8.00E-02 |
|  | <i>TMPRSS6</i> | rs17750152 | T | GENO_2DF | 1067 | NA     | NA    | NA     | NA    | 3.28  | 1.95E-01 |
|  | <i>TMPRSS6</i> | rs4140590  | A | HOM      | 1570 | -0.038 | 0.029 | -0.095 | 0.020 | -1.29 | 1.98E-01 |
|  | <i>TMPRSS6</i> | rs4140590  | A | HET      | 1570 | -0.021 | 0.023 | -0.066 | 0.024 | -0.91 | 3.63E-01 |
|  | <i>TMPRSS6</i> | rs4140590  | A | GENO_2DF | 1570 | NA     | NA    | NA     | NA    | 1.76  | 4.14E-01 |
|  | <i>TMPRSS6</i> | rs4140589  | A | HOM      | 1603 | -0.034 | 0.029 | -0.091 | 0.023 | -1.17 | 2.41E-01 |
|  | <i>TMPRSS6</i> | rs4140589  | A | HET      | 1603 | -0.021 | 0.023 | -0.065 | 0.023 | -0.92 | 3.57E-01 |
|  | <i>TMPRSS6</i> | rs4140589  | A | GENO_2DF | 1603 | NA     | NA    | NA     | NA    | 1.54  | 4.63E-01 |
|  | <i>TMPRSS6</i> | rs5995380  | T | HOM      | 1681 | 0.081  | 0.053 | -0.024 | 0.185 | 1.52  | 1.29E-01 |
|  | <i>TMPRSS6</i> | rs5995380  | T | HET      | 1681 | 0.008  | 0.021 | -0.034 | 0.050 | 0.39  | 6.94E-01 |
|  | <i>TMPRSS6</i> | rs5995380  | T | GENO_2DF | 1681 | NA     | NA    | NA     | NA    | 2.35  | 3.09E-01 |
|  | <i>TMPRSS6</i> | rs11704654 | T | HOM      | 1723 | 0.089  | 0.051 | -0.010 | 0.188 | 1.76  | 7.85E-02 |
|  | <i>TMPRSS6</i> | rs11704654 | T | HET      | 1723 | 0.005  | 0.021 | -0.036 | 0.046 | 0.23  | 8.22E-01 |
|  | <i>TMPRSS6</i> | rs11704654 | T | GENO_2DF | 1723 | NA     | NA    | NA     | NA    | 3.10  | 2.12E-01 |
|  | <i>TMPRSS6</i> | rs5756515  | G | HOM      | 1684 | -0.030 | 0.028 | -0.086 | 0.026 | -1.06 | 2.88E-01 |
|  | <i>TMPRSS6</i> | rs5756515  | G | HET      | 1684 | -0.021 | 0.022 | -0.064 | 0.022 | -0.94 | 3.46E-01 |
|  | <i>TMPRSS6</i> | rs5756515  | G | GENO_2DF | 1684 | NA     | NA    | NA     | NA    | 1.38  | 5.03E-01 |

|  |                |           |   |          |      |        |       |        |       |       |          |
|--|----------------|-----------|---|----------|------|--------|-------|--------|-------|-------|----------|
|  | <i>TMPRSS6</i> | rs5756516 | T | HOM      | 1684 | -0.030 | 0.028 | -0.086 | 0.026 | -1.06 | 2.88E-01 |
|  | <i>TMPRSS6</i> | rs5756516 | T | HET      | 1684 | -0.021 | 0.022 | -0.064 | 0.022 | -0.94 | 3.46E-01 |
|  | <i>TMPRSS6</i> | rs5756516 | T | GENO_2DF | 1684 | NA     | NA    | NA     | NA    | 1.38  | 5.03E-01 |
|  | <i>TMPRSS6</i> | rs228909  | G | HOM      | 1803 | 0.070  | 0.046 | -0.019 | 0.160 | 1.53  | 1.25E-01 |
|  | <i>TMPRSS6</i> | rs228909  | G | HET      | 1803 | 0.004  | 0.020 | -0.036 | 0.043 | 0.18  | 8.56E-01 |
|  | <i>TMPRSS6</i> | rs228909  | G | GENO_2DF | 1803 | NA     | NA    | NA     | NA    | 2.36  | 3.08E-01 |
|  | <i>TMPRSS6</i> | rs228910  | A | HOM      | 1803 | 0.008  | 0.028 | -0.047 | 0.064 | 0.29  | 7.75E-01 |
|  | <i>TMPRSS6</i> | rs228910  | A | HET      | 1803 | -0.025 | 0.020 | -0.065 | 0.014 | -1.25 | 2.12E-01 |
|  | <i>TMPRSS6</i> | rs228910  | A | GENO_2DF | 1803 | NA     | NA    | NA     | NA    | 2.25  | 3.26E-01 |
|  | <i>TMPRSS6</i> | rs2235329 | C | HOM      | 1687 | -0.018 | 0.028 | -0.074 | 0.037 | -0.65 | 5.18E-01 |
|  | <i>TMPRSS6</i> | rs2235329 | C | HET      | 1687 | -0.016 | 0.022 | -0.058 | 0.027 | -0.73 | 4.67E-01 |
|  | <i>TMPRSS6</i> | rs2235329 | C | GENO_2DF | 1687 | NA     | NA    | NA     | NA    | 0.65  | 7.22E-01 |
|  | <i>TMPRSS6</i> | rs228913  | C | HOM      | 1803 | 0.082  | 0.050 | -0.017 | 0.181 | 1.63  | 1.04E-01 |
|  | <i>TMPRSS6</i> | rs228913  | C | HET      | 1803 | 0.010  | 0.020 | -0.030 | 0.050 | 0.50  | 6.20E-01 |
|  | <i>TMPRSS6</i> | rs228913  | C | GENO_2DF | 1803 | NA     | NA    | NA     | NA    | 2.73  | 2.55E-01 |
|  | <i>TMPRSS6</i> | rs228916  | C | HOM      | 1790 | 0.014  | 0.084 | -0.151 | 0.179 | 0.16  | 8.70E-01 |
|  | <i>TMPRSS6</i> | rs228916  | C | HET      | 1790 | -0.012 | 0.023 | -0.056 | 0.033 | -0.52 | 6.06E-01 |
|  | <i>TMPRSS6</i> | rs228916  | C | GENO_2DF | 1790 | NA     | NA    | NA     | NA    | 0.30  | 8.59E-01 |
|  | <i>TMPRSS6</i> | rs228918  | C | HOM      | 1802 | 0.036  | 0.027 | -0.017 | 0.088 | 1.33  | 1.85E-01 |
|  | <i>TMPRSS6</i> | rs228918  | C | HET      | 1802 | -0.004 | 0.021 | -0.045 | 0.036 | -0.22 | 8.30E-01 |
|  | <i>TMPRSS6</i> | rs228918  | C | GENO_2DF | 1802 | NA     | NA    | NA     | NA    | 2.54  | 2.81E-01 |
|  | <i>TMPRSS6</i> | rs228919  | T | HOM      | 1802 | 0.037  | 0.027 | -0.016 | 0.090 | 1.38  | 1.68E-01 |
|  | <i>TMPRSS6</i> | rs228919  | T | HET      | 1802 | -0.003 | 0.021 | -0.044 | 0.037 | -0.17 | 8.66E-01 |
|  | <i>TMPRSS6</i> | rs228919  | T | GENO_2DF | 1802 | NA     | NA    | NA     | NA    | 2.64  | 2.67E-01 |
|  | <i>TMPRSS6</i> | rs2092169 | T | HOM      | 1127 | 0.173  | 0.162 | -0.143 | 0.490 | 1.07  | 2.83E-01 |
|  | <i>TMPRSS6</i> | rs2092169 | T | HET      | 1127 | -0.012 | 0.033 | -0.077 | 0.052 | -0.37 | 7.13E-01 |
|  | <i>TMPRSS6</i> | rs2092169 | T | GENO_2DF | 1127 | NA     | NA    | NA     | NA    | 1.31  | 5.18E-01 |
|  | <i>TMPRSS6</i> | rs228921  | G | HOM      | 1801 | 0.037  | 0.027 | -0.016 | 0.090 | 1.38  | 1.68E-01 |
|  | <i>TMPRSS6</i> | rs228921  | G | HET      | 1801 | -0.003 | 0.021 | -0.044 | 0.037 | -0.17 | 8.68E-01 |
|  | <i>TMPRSS6</i> | rs228921  | G | GENO_2DF | 1801 | NA     | NA    | NA     | NA    | 2.64  | 2.68E-01 |
|  | <i>TMPRSS6</i> | rs3076475 | T | HOM      | 1065 | -0.001 | 0.058 | -0.115 | 0.113 | -0.01 | 9.89E-01 |
|  | <i>TMPRSS6</i> | rs3076475 | T | HET      | 1065 | -0.038 | 0.026 | -0.088 | 0.013 | -1.45 | 1.47E-01 |
|  | <i>TMPRSS6</i> | rs3076475 | T | GENO_2DF | 1065 | NA     | NA    | NA     | NA    | 2.15  | 3.41E-01 |

|  |                |            |   |          |      |        |       |        |       |       |          |
|--|----------------|------------|---|----------|------|--------|-------|--------|-------|-------|----------|
|  | <i>TMPRSS6</i> | rs228924   | A | HOM      | 1803 | 0.014  | 0.084 | -0.152 | 0.179 | 0.16  | 8.71E-01 |
|  | <i>TMPRSS6</i> | rs228924   | A | HET      | 1803 | -0.013 | 0.022 | -0.057 | 0.031 | -0.56 | 5.76E-01 |
|  | <i>TMPRSS6</i> | rs228924   | A | GENO_2DF | 1803 | NA     | NA    | NA     | NA    | 0.35  | 8.39E-01 |
|  | <i>TMPRSS6</i> | rs228925   | A | HOM      | 1126 | 0.041  | 0.052 | -0.061 | 0.144 | 0.79  | 4.32E-01 |
|  | <i>TMPRSS6</i> | rs228925   | A | HET      | 1126 | -0.032 | 0.025 | -0.081 | 0.017 | -1.28 | 2.00E-01 |
|  | <i>TMPRSS6</i> | rs228925   | A | GENO_2DF | 1126 | NA     | NA    | NA     | NA    | 2.71  | 2.58E-01 |
|  | <i>TMPRSS6</i> | rs5756520  | A | HOM      | 1799 | 0.037  | 0.027 | -0.016 | 0.090 | 1.38  | 1.68E-01 |
|  | <i>TMPRSS6</i> | rs5756520  | A | HET      | 1799 | -0.003 | 0.021 | -0.043 | 0.037 | -0.15 | 8.82E-01 |
|  | <i>TMPRSS6</i> | rs5756520  | A | GENO_2DF | 1799 | NA     | NA    | NA     | NA    | 2.60  | 2.72E-01 |
|  | <i>TMPRSS6</i> | rs11914132 | T | HOM      | 1804 | 0.074  | 0.038 | -0.001 | 0.150 | 1.94  | 5.31E-02 |
|  | <i>TMPRSS6</i> | rs11914132 | T | HET      | 1804 | -0.028 | 0.020 | -0.066 | 0.011 | -1.39 | 1.63E-01 |
|  | <i>TMPRSS6</i> | rs11914132 | T | GENO_2DF | 1804 | NA     | NA    | NA     | NA    | 6.94  | 3.11E-02 |
|  | <i>TMPRSS6</i> | rs738297   | C | HOM      | 1793 | 0.073  | 0.052 | -0.029 | 0.174 | 1.41  | 1.59E-01 |
|  | <i>TMPRSS6</i> | rs738297   | C | HET      | 1793 | 0.007  | 0.021 | -0.034 | 0.047 | 0.33  | 7.44E-01 |
|  | <i>TMPRSS6</i> | rs738297   | C | GENO_2DF | 1793 | NA     | NA    | NA     | NA    | 2.01  | 3.66E-01 |
|  | <i>TMPRSS6</i> | rs11089823 | C | HOM      | 1796 | 0.076  | 0.039 | 0.001  | 0.152 | 1.98  | 4.80E-02 |
|  | <i>TMPRSS6</i> | rs11089823 | C | HET      | 1796 | -0.028 | 0.020 | -0.067 | 0.011 | -1.43 | 1.54E-01 |
|  | <i>TMPRSS6</i> | rs11089823 | C | GENO_2DF | 1796 | NA     | NA    | NA     | NA    | 7.26  | 2.65E-02 |
|  | <i>TMPRSS6</i> | rs11089824 | C | HOM      | 1796 | 0.076  | 0.039 | 0.001  | 0.152 | 1.98  | 4.80E-02 |
|  | <i>TMPRSS6</i> | rs11089824 | C | HET      | 1796 | -0.028 | 0.020 | -0.067 | 0.011 | -1.43 | 1.54E-01 |
|  | <i>TMPRSS6</i> | rs11089824 | C | GENO_2DF | 1796 | NA     | NA    | NA     | NA    | 7.26  | 2.65E-02 |

**Table S10. Mean serum hepcidin concentrations (nM) stratified by genotypes of *TMPRSS6* rs855791 and *HFE* rs1800562 in the total study population (N=1832) and in Subset 2 (N=1177).**

|                      |            | All                     |                      |             |             | Subset 2                |             |             |             |          |
|----------------------|------------|-------------------------|----------------------|-------------|-------------|-------------------------|-------------|-------------|-------------|----------|
|                      |            | <i>TMPRSS6</i> rs855791 |                      |             |             | <i>TMPRSS6</i> rs855791 |             |             |             |          |
|                      |            | GG                      | AG                   | AA          | <i>P</i> *  | GG                      | AG          | AA          | <i>P</i> *  |          |
| <i>HFE</i> rs1800562 | GG         | N                       | 467                  | 811         | 330         | 1.38E-01                | 315         | 511         | 218         | 2.70E-01 |
|                      |            | Geometric mean (SD)†    | 6.08 (2.60)          | 6.38 (2.64) | 6.97 (2.54) |                         | 6.08 (2.55) | 6.13 (2.56) | 6.86 (2.54) |          |
|                      | AG         | N                       | 64                   | 117         | 38          | 9.48E-01                | 40          | 71          | 18          | 9.54E-01 |
|                      |            |                         | Geometric mean (SD)† | 6.35 (2.67) | 6.25 (2.40) |                         | 6.62 (2.65) | 6.25 (2.69) | 5.96 (2.19) |          |
|                      | AA         | N                       | 2                    | 2           | 1           | 6.38E-01                | 2           | 2           | 0           | 5.19E-01 |
|                      |            |                         | Geometric mean (SD)† | 2.98 (1.73) | 4.34 (1.50) |                         | 5.34 (NA)   | 2.98 (1.73) | 4.34 (1.50) |          |
|                      | <i>P</i> * | 5.40E-01                | 8.36E-01             | 9.12E-01    |             | 5.54E-01                | 8.47E-01    | 6.55E-01    |             |          |

N indicates number; NA, not applicable.

\**P*-value derived from one-way ANOVA using the log-transformed serum hepcidin concentration as dependent variable.

†Geometric means are presented, because we used log-transformed serum hepcidin as dependent variable conform other analyses.
